# Supplementary material for: Patient-Derived Organoids of Cholangiocarcinoma
Source: Int J Mol Sci. 2021 Aug 12;22(16):8675. doi: 10.3390/ijms22168675 (PMC8395494; doi:10.3390/ijms22168675)
Supplement: Supplementary file 1 [file ijms-22-08675-s001.zip › IJMS, Appendix Tables_CM_LZ.xlsx]

## Sheet: Table S1
Table S1. Antibodies.
	Products	Clonality	Conjugate	Supplier	Cat#
	Cytokeratin 7 antibody	Monoclonal (OV-TL12/30)	Alexa Fluor 488	Novus Biologicals	NBP1-22539
	Anti-Cytokeratin 19 antibody	Monoclonal (RCK108)	Unconjugated	DAKO	M0888
	anti-human CD326 (EpCAM) Antibody	Monoclonal (9C4)	Alexa Fluor 488	Biolegend	324207
	Anti-MUC1 antibody	Polyclonal	Unconjugated	Abcam	ab15481
	p53 Mouse mAb	Monoclonal (1C12)	Unconjugated	Cell Signaling Technology	2524S
	Goat anti-Mouse IgG	Polyclonal	Alexa Fluor 488	Invitrogen	A28175

## Sheet: Table S2
Table S2. Significantly enriched Kyoto Encyclopedia of Genes and Genomes (KEGG) pathways of over representative genes in P68 cholangiocarcinoma compared to the control healthy biliary tissue.
	ID	Description	GeneRatio	BgRatio	p value	p.adjust	q value	geneID	Count
	hsa04360	Axon guidance	63/1699	182/8102	1.14614e-05	0.00164952	0.00116287	2048/10509/2049/5727/4233/10154/5879/9901/219699/1969/90249/10507/64218/5880/2043/22885/29984/6405/1073/8829/91653/6091/5295/658/57715/25/2771/84612/5998/59277/5364/54361/5291/3983/9353/25791/1943/10371/64101/6469/4756/54434/2041/7852/84448/2534/5293/5336/9723/1942/659/4773/6608/5530/8503/2770/84552/50855/5365/1944/55558/6093/10398	63
	hsa05222	Small cell lung cancer	37/1699	92/8102	1.91996e-05	0.00164952	0.00116287	3918/1286/3675/6256/1287/3914/1285/3908/1021/3912/1163/5295/207/4790/330/7187/598/9618/3909/4616/5291/1869/1643/898/3915/7188/1288/5293/2272/51426/5915/10000/1282/5925/1164/3655/8503	37
	hsa04611	Platelet activation	46/1699	124/8102	2.41674e-05	0.00164952	0.00116287	111/255189/5742/5028/3708/2983/7094/5332/115/5321/4067/5600/3709/83706/5566/5295/1277/207/2771/6850/2776/10125/8673/5291/2149/107/196883/5906/5330/2534/5567/109/5293/5336/4638/3690/6916/10000/5593/2909/5592/113/8503/2770/8605/6093	46
	hsa04510	Focal adhesion	67/1699	201/8102	2.49907e-05	0.00164952	0.00116287	5228/3918/1291/1286/56034/4233/80310/3675/5879/7057/2317/3691/1287/87/3914/4660/7094/7409/894/1285/5880/3908/2064/3695/3912/3694/5295/7148/1277/207/330/3909/8395/1293/2889/3680/3678/5291/3672/5906/6655/3915/1956/2316/1288/2534/5293/2318/7422/1299/3696/4638/1793/3690/10000/55742/1282/2909/3655/25759/8503/3371/3725/399694/8515/6093/10398	67
	hsa04923	Regulation of lipolysis in adipocytes	26/1699	57/8102	2.5222e-05	0.00164952	0.00116287	111/154/5742/134/115/11145/5566/5295/207/2771/5291/107/196883/5567/109/5293/4886/5140/10000/5593/5592/113/8660/8503/2770/3991	26
	hsa05166	Human T-cell leukemia virus 1 infection	71/1699	219/8102	4.08349e-05	0.002116	0.00149172	111/7042/7416/3135/4089/3109/3689/7046/7094/7538/3554/894/1958/115/23373/7850/4215/3123/3108/2648/8829/1959/7043/4088/5566/3112/5295/991/207/1031/8850/4790/598/64784/5291/64764/55697/6513/3601/29882/107/1869/196883/3133/7040/472/898/148327/9133/5567/109/5293/9232/567/4214/1111/3383/8061/10000/5925/2033/4773/113/293/3718/5530/8503/51529/3725/2113/701	71
	hsa05146	Amoebiasis	39/1699	102/8102	4.52966e-05	0.002116	0.00149172	3918/1286/7042/3689/1287/87/929/3914/5332/3554/1285/7850/7097/3908/7043/3912/5566/7099/5295/3576/1277/4790/2776/9630/2921/3909/2920/2919/5291/107/7040/3915/5330/1288/5567/5293/1282/733/8503	39
	hsa05414	Dilated cardiomyopathy	37/1699	96/8102	5.76806e-05	0.00235769	0.00166211	111/7042/3675/3691/1756/115/3908/7043/3695/5566/3694/489/6443/183/3680/3678/784/487/3672/107/196883/7040/776/7139/7168/785/5567/109/3696/783/3690/781/113/27092/3655/93589/8515	37
	hsa05226	Gastric cancer	51/1699	149/8102	0.000106282	0.00376251	0.00265247	8321/8325/1045/7042/4233/7855/4089/2263/8313/6256/1015/7046/8817/3728/8322/8324/7473/7043/2064/4088/4041/5295/207/54361/4616/5291/2535/6934/2475/1869/6469/1643/7040/6655/898/1956/7482/5293/51426/5915/2254/10000/4040/5925/25759/8503/2549/7483/399694/8323/2247	51
	hsa04015	Rap1 signaling pathway	67/1699	210/8102	0.000115062	0.00376251	0.00265247	5228/1902/111/56034/4233/5909/80310/5879/2263/7057/22808/1435/3689/1969/5028/26037/7094/8817/5332/7409/115/5880/5600/91860/5295/207/2771/84612/2776/5587/2889/5291/9732/1943/2149/107/196883/135/5906/57121/1956/2260/1500/5330/109/5293/7422/2254/1942/51466/3690/23683/51735/10000/136/9693/113/27040/3397/8503/2770/84552/50855/2261/1944/375189/2247	67
	hsa00532	Glycosaminoglycan biosynthesis - chondroitin sulfate / dermatan sulfate	12/1699	20/8102	0.000161189	0.00451717	0.00318449	50515/51363/55790/29940/10090/55454/22856/113189/55501/79586/64131/56548	12
	hsa05205	Proteoglycans in cancer	65/1699	205/8102	0.000176907	0.00451717	0.00318449	8321/8325/3091/7042/5727/4233/7855/5879/7057/2317/22808/7430/7078/3708/2817/4660/7409/7097/8322/8324/3059/7473/5600/3709/2064/5566/7099/5295/1277/207/1514/4478/54361/3678/2065/5291/2535/27250/2475/6469/7040/6655/1956/7482/2260/2316/5567/5293/2318/5336/7422/288/3690/5329/10855/10000/6608/8503/2549/7483/6383/8323/5962/6093/2247	65
	hsa04976	Bile secretion	34/1699	90/8102	0.000179582	0.00451717	0.00318449	111/6256/8671/115/760/8714/2052/9429/5566/358/6550/54576/57552/54600/54659/54577/54579/54657/54575/10257/28234/54658/338821/54578/6513/6523/107/196883/3156/5567/109/478/483/113	34
	hsa04512	ECM-receptor interaction	33/1699	88/8102	0.000261046	0.00593698	0.00418541	3918/1291/1286/80144/3675/7057/3691/1287/3914/1285/3908/3695/3912/3694/7148/1277/3909/1293/3680/3678/3672/3915/1288/255743/341640/1299/3696/3690/1282/3655/3371/3161/8515	33
	hsa04928	Parathyroid hormone synthesis, secretion and action	38/1699	106/8102	0.000272338	0.00593698	0.00418541	10568/111/4324/6256/5143/3708/5332/1958/115/2768/3709/5142/7421/5566/4041/2625/2771/2776/64764/107/196883/4205/1956/2260/148327/5330/5567/109/860/4209/4323/5337/4040/113/2770/4326/64386/4929	38
	hsa04218	Cellular senescence	51/1699	156/8102	0.000382012	0.00742222	0.00523247	7042/7416/3135/22808/3708/2626/7046/894/5600/3709/9261/91860/1021/7043/4088/5295/3576/28996/207/90550/4790/4616/5291/2475/1869/3364/5934/3133/7040/472/898/1875/776/5883/9133/5293/91750/2305/1111/10000/5925/4773/293/891/132660/204851/5530/8503/3486/2113/983	51
	hsa05225	Hepatocellular carcinoma	54/1699	168/8102	0.000418315	0.00742222	0.00523247	8321/8325/7042/4233/7855/4089/8313/6604/7046/8322/8324/7473/1021/7043/8289/4088/4041/5295/207/598/6595/54361/57492/4616/5291/2938/2535/7296/6934/2475/1869/1643/7040/8110/6655/1956/7482/5293/51426/2947/5336/2948/3162/10000/4040/5925/1728/25759/7039/8503/2549/7483/399694/8323	54
	hsa05211	Renal cell carcinoma	27/1699	69/8102	0.000421657	0.00742222	0.00523247	3091/7042/4233/5879/7043/5295/207/2889/5291/54583/6513/112399/5906/7040/6655/9915/405/5293/7422/10000/2033/7039/8503/2549/3725/2113/2034	27
	hsa05212	Pancreatic cancer	29/1699	76/8102	0.000431261	0.00742222	0.00523247	7042/4089/5879/7046/5880/1021/7043/2064/4088/5295/207/4790/598/5888/4616/5291/2475/1869/1643/7040/1956/5293/51426/7422/10000/5337/5925/7039/8503	29
	hsa01522	Endocrine resistance	35/1699	98/8102	0.000507008	0.00828423	0.00584016	111/115/5600/2064/5566/5295/207/1031/28514/5291/4855/2475/107/1869/3714/1564/196883/6655/2100/4851/1956/5567/109/5293/4854/182/4853/10000/5925/113/638/25759/8503/3725/399694	35
	hsa05412	Arrhythmogenic right ventricular cardiomyopathy	29/1699	77/8102	0.000555444	0.00828423	0.00584016	1824/3675/1832/3691/1756/3728/3908/3695/3694/489/1829/6443/3680/3678/784/487/3672/6934/776/785/3696/783/3690/781/27092/3655/93589/8515/2697	29
	hsa04550	Signaling pathways regulating pluripotency of stem cells	47/1699	143/8102	0.000557349	0.00828423	0.00584016	8321/8325/7855/652/4089/2263/8313/6926/4211/8322/8324/7473/5600/4088/5295/658/207/3572/3398/54361/4086/3670/5291/2535/90/5013/7482/2260/5293/5978/3976/84759/5080/659/10000/6498/463/3720/3718/3397/5460/8503/2261/7483/8323/3977/2247	47
	hsa04926	Relaxin signaling pathway	43/1699	129/8102	0.000678104	0.00964088	0.00679656	4312/111/1286/1287/7046/5332/1285/115/10681/5600/5566/5295/1277/207/2771/4790/5291/64764/107/196883/7040/6655/1956/2790/148327/5330/1288/5567/109/5293/7422/2787/59345/59/10000/1282/113/1906/25759/8503/2770/3725/399694	43
	hsa04390	Hippo signaling pathway	50/1699	157/8102	0.000850022	0.0115815	0.00816468	8321/8325/7042/7855/652/4089/122786/8313/3689/7046/894/8322/8324/7473/4092/7043/4088/7534/1742/658/5520/330/84612/60485/3398/54361/1740/4086/8994/2535/6934/2736/332/7040/1490/27113/7482/9113/166824/3993/659/84962/85409/26524/3397/84552/50855/7483/8323/7003	50
	hsa05165	Human papillomavirus infection	93/1699	331/8102	0.00100977	0.0127344	0.00897741	8321/8325/3918/1291/1286/7855/8638/3135/3675/7057/8313/3691/1287/3914/894/55534/1285/5734/8322/8324/245973/7473/3908/1021/3695/3912/7098/5566/3694/5295/7148/9550/1277/207/155066/4790/5520/84612/7187/3909/1293/54361/1740/3680/3678/5291/64764/2535/4855/3672/6934/2475/1869/5934/3133/472/10134/6655/898/3915/523/9636/4851/1956/7482/148327/1288/9114/5567/5293/4854/182/7422/1299/3696/4853/3690/3993/5550…	93
	hsa04010	MAPK signaling pathway	84/1699	294/8102	0.00101252	0.0127344	0.00897741	5228/6196/7042/255189/56034/4233/80310/115727/5879/2263/2317/22808/1435/1969/929/7046/8817/3554/627/5880/4215/2768/5321/5600/9261/7043/2064/1843/5566/1649/3306/207/4790/10125/51776/2323/8913/784/4616/4216/2065/1943/80824/5906/5494/3556/7040/6655/776/2122/1956/3164/2260/2316/4915/785/5567/5598/9479/9064/2318/9175/7422/4137/4214/2254/1942/783/9252/11221/781/10000/2872/9693/27092/5924/7039/5530/2261…	84
	hsa05224	Breast cancer	47/1699	147/8102	0.00109182	0.0132232	0.00932201	8321/8325/7855/8313/8817/8322/8324/7473/1021/2064/4041/5295/207/28514/54361/4616/5291/2535/4855/6934/2475/1869/3714/1643/6655/2100/4851/1956/7482/2260/5293/4854/51426/182/2254/4853/672/10000/4040/5925/25759/8503/3725/7483/399694/8323/2247	47
	hsa05217	Basal cell carcinoma	24/1699	63/8102	0.00134643	0.0157244	0.0110853	8321/8325/5727/7855/652/8313/8322/8324/7473/51684/54361/4616/2535/6934/2736/6469/2737/1643/7482/51426/8643/6608/7483/8323	24
	hsa04371	Apelin signaling pathway	44/1699	137/8102	0.00140129	0.0158007	0.0111391	111/4089/22808/10891/3708/7046/5327/5332/1958/115/10681/3709/91860/4088/5566/207/2771/2776/814/2475/107/196883/4205/1490/9759/2790/5330/5567/109/4854/182/5140/2787/4638/4209/59345/59/10000/113/4207/2770/5581/6263/3991	44
	hsa04933	AGE-RAGE signaling pathway in diabetic complications	34/1699	100/8102	0.00162473	0.0173896	0.0122592	1286/7042/4089/5879/1287/113026/7046/5332/1285/1958/7056/5600/7043/4088/5295/3576/1277/207/4790/183/5291/7040/5330/1288/5293/5336/7422/3383/10000/1282/1906/8503/3725/5581	34
	hsa04915	Estrogen signaling pathway	44/1699	138/8102	0.00164856	0.0173896	0.0122592	3880/111/3866/25984/3875/3708/5332/115/3709/91860/5566/3306/5295/2288/207/2771/2776/7031/3872/5291/64764/107/196883/3858/6655/2100/1956/148327/5330/3860/2289/5567/109/5293/3326/1509/10000/113/25759/7039/8503/2770/3725/399694	44
	hsa04151	PI3K-Akt signaling pathway	97/1699	354/8102	0.00191098	0.0191873	0.0135266	5228/1902/3918/1291/1286/56034/4233/80310/3675/5879/2263/7057/6256/1435/3691/1969/1287/3914/3563/8817/894/1285/4602/627/6446/10681/7097/3570/3908/1021/2064/3695/3912/7534/7099/3694/5295/7148/1277/207/6850/4790/5520/598/3574/3909/23239/1293/2323/10110/3680/3678/2065/5291/64764/3672/1943/2149/2475/5934/9180/6655/57121/898/3915/117145/1956/3164/2260/2790/148327/4915/1288/5293/3326/7422/2787/1299/369…	97
	hsa00830	Retinol metabolism	25/1699	68/8102	0.00193634	0.0191873	0.0135266	216/54905/29785/8854/195814/54884/51109/54576/54600/54659/54577/54579/54657/8694/54575/54658/54578/220/1577/8608/8630/126/5959/9227/56603	25
	hsa04934	Cushing syndrome	48/1699	155/8102	0.00206218	0.0198333	0.013982	8321/8325/111/7855/8313/3708/5332/115/5087/8322/8324/7473/3709/1021/5566/1031/2771/57552/2776/8913/54361/183/64764/2535/6934/107/1869/8622/196883/5906/898/776/1956/7482/3164/148327/405/5330/5567/109/5925/79798/113/2770/7483/8323/50940/8085	48
	hsa04072	Phospholipase D signaling pathway	46/1699	148/8102	0.00233097	0.0217779	0.0153529	1902/111/255189/56034/1608/80310/22808/8613/56895/26052/5332/115/2768/5321/5295/3576/207/6850/27128/8395/1759/183/5291/10555/2149/2475/107/196883/6655/57121/1956/5330/1606/8611/2534/109/5293/5336/10000/5337/113/25759/8503/2549/8605/399694	46
	hsa04330	Notch signaling pathway	22/1699	59/8102	0.00288121	0.026171	0.0184498	7091/1840/55534/2648/7088/7089/8850/28514/8650/4855/3714/79816/4851/4854/9253/83464/182/342371/4853/6310/2033/3955	22
	hsa00512	Mucin type O-glycan biosynthesis	14/1699	32/8102	0.00305719	0.0270189	0.0190476	2650/6482/55568/63917/374378/2590/51301/55808/8693/100528030/6483/9334/51809/50614	14
	hsa04964	Proximal tubule bicarbonate reclamation	11/1699	23/8102	0.00365575	0.0306663	0.021619	8671/760/358/6550/1468/27165/478/2744/483/2747/5105	11
	hsa04022	cGMP-PKG signaling pathway	50/1699	167/8102	0.00365745	0.0306663	0.021619	111/7416/154/3708/2983/134/2626/5332/9569/115/2768/3709/91860/489/207/2771/2776/8654/5139/4882/487/64764/107/196883/1259/4205/624/776/148327/5330/109/5140/4638/4209/478/10000/5593/4773/493/483/5592/113/293/8660/4207/5530/2770/5581/6093/10398	50
	hsa04110	Cell cycle	39/1699	124/8102	0.00384161	0.0314052	0.0221398	7042/2810/4089/990/894/1021/7043/4088/7534/991/25/1031/995/4999/4616/29882/1869/4173/5934/7040/472/898/1875/9133/9232/1111/1028/5925/2033/7465/8318/891/699/5347/51529/7272/983/8317/701	39
	hsa05410	Hypertrophic cardiomyopathy	30/1699	90/8102	0.00414826	0.0330849	0.023324	7042/3675/3691/1756/3908/7043/3695/3694/489/6443/183/3680/3678/784/487/3672/7040/776/7139/7168/785/3696/783/3690/781/27092/3655/1906/93589/8515	30
	hsa01521	EGFR tyrosine kinase inhibitor resistance	27/1699	79/8102	0.004325	0.0336732	0.0237387	56034/4233/2621/80310/2263/3570/2064/5295/207/598/2065/5291/2475/6655/1956/5293/5336/7422/558/10000/25759/7039/8503/2549/2261/399694/2247	27
	hsa04925	Aldosterone synthesis and secretion	32/1699	98/8102	0.00447854	0.0340577	0.0240098	111/3708/5332/115/3709/91860/5566/2776/5587/8913/814/183/64764/747/107/196883/221955/776/3164/148327/5330/5567/109/478/23683/493/483/113/5581/8536/3991/4929	32
	hsa04810	Regulation of actin cytoskeleton	62/1699	218/8102	0.00490521	0.0361887	0.025512	89846/1902/56034/79784/80310/3675/5879/2263/22808/3689/7430/3691/4629/87/4660/8817/7409/5880/2768/1073/10163/3695/3694/5295/10788/4628/4478/8395/3680/5305/3678/5291/85477/3672/2149/6655/57121/624/128239/54434/1956/2260/7852/1131/5293/50649/3696/4638/2254/1793/3690/2909/3655/8503/2261/5962/8515/6093/375189/10398/200576/2247	62
	hsa05220	Chronic myeloid leukemia	26/1699	76/8102	0.00498009	0.0361887	0.025512	7042/4089/7046/1021/7043/4088/5295/25/207/4790/598/861/4616/5291/1869/1643/7040/6655/2122/5293/51426/10000/5925/25759/8503/399694	26
	hsa04924	Renin secretion	24/1699	69/8102	0.00539254	0.0381843	0.0269189	111/154/3708/2983/134/5332/5734/3709/91860/5566/358/2771/2776/5139/183/776/5330/5567/3759/5140/5593/1906/5530/2770	24
	hsa00330	Arginine and proline metabolism	19/1699	51/8102	0.00548826	0.0381843	0.0269189	6611/4942/6723/26/548596/51056/223/6303/5832/1159/8974/219/2628/217/8659/5831/79814/283208/1160	19
	hsa04914	Progesterone-mediated oocyte maturation	32/1699	100/8102	0.00628423	0.0428113	0.0301808	6196/111/115/5600/5566/5295/207/2771/995/6793/5291/29882/107/196883/80315/9133/6790/5567/109/5293/3326/5140/22849/10000/113/891/699/8503/2770/5347/51529/983	32
	hsa01523	Antifolate resistance	13/1699	31/8102	0.00659125	0.0439865	0.0310093	8714/6470/9429/113235/4790/10257/2356/471/4524/2348/200895/7298/6573	13
	hsa04970	Salivary secretion	30/1699	93/8102	0.00704478	0.0451695	0.0318433	111/154/727897/3708/2983/5332/115/3709/91860/1755/5566/2776/1471/55503/6558/107/196883/6844/5330/1131/5567/109/683/478/5593/493/483/5592/113/6263	30
	hsa05323	Rheumatoid arthritis	30/1699	93/8102	0.00704478	0.0451695	0.0318433	4312/7042/1513/1435/3109/3689/7097/3123/3108/245973/8741/7043/7099/3112/3576/9550/155066/3606/51561/2921/1514/2920/2919/7040/523/9114/7422/8792/3383/3725	30
	hsa05215	Prostate cancer	31/1699	97/8102	0.00723045	0.0454684	0.032054	2119/56034/80310/2263/5327/7850/6935/2064/5295/207/4790/6692/5291/64764/6934/2475/1869/6655/898/1956/2260/148327/5293/3326/4824/7113/10000/5925/2033/7039/8503	31
	hsa04520	Adherens junction	24/1699	71/8102	0.00804628	0.049644	0.0349977	4233/5797/4089/5879/87/7046/5880/81607/10163/2064/4088/25945/10580/5787/6934/1956/2260/1500/2534/5795/6615/2033/4008/10810	24
	hsa04750	Inflammatory mediator regulation of TRP channels	31/1699	98/8102	0.00850372	0.0514948	0.0363024	111/255189/5583/3708/5332/3554/115/5734/5321/5600/3709/91860/5566/5295/2776/5291/107/196883/3556/624/5330/5567/109/5293/5336/9311/41/113/8503/8605/5581	31
	hsa04310	Wnt signaling pathway	48/1699	166/8102	0.00889872	0.0529069	0.037298	7091/8321/8325/144165/7855/4089/5879/8313/4007/22943/5332/894/84133/5880/4919/8322/8324/7473/7088/2239/166336/4088/5566/4041/7089/5176/54361/27101/55366/2535/59352/6934/79816/54894/7482/5330/8549/56998/5567/8061/4040/2033/4773/85409/5530/3725/7483/8323	48
	hsa04392	Hippo signaling pathway - multiple species	12/1699	29/8102	0.0100961	0.0589541	0.0415611	122786/79633/60485/9770/8994/8642/9113/166824/84962/83937/26524/7003	12
	hsa04935	Growth hormone synthesis, secretion and action	36/1699	119/8102	0.0104461	0.0599274	0.0422472	111/3708/3726/5332/115/5600/3709/5566/5295/207/2771/2776/5291/64764/2475/107/196883/6655/776/148327/5330/5567/109/5293/5336/9021/4214/10000/2033/113/8660/25759/8503/2770/3486/399694	36
	hsa04927	Cortisol synthesis and secretion	22/1699	65/8102	0.010719	0.0604331	0.0426037	111/3708/5332/115/5087/3709/5566/57552/2776/8913/183/64764/107/8622/196883/776/3164/148327/5330/5567/109/113	22
	hsa04540	Gap junction	28/1699	88/8102	0.0110339	0.0611538	0.0431118	1902/111/56034/80310/3708/2983/5332/115/3709/5566/2771/2776/107/196883/6655/1956/5330/5567/109/5598/7846/5593/5592/113/81027/2770/983/2697	28
	hsa00790	Folate biosynthesis	11/1699	26/8102	0.0112447	0.0612834	0.0432032	4337/2643/5092/6697/57016/55034/2356/4338/200895/10243/231	11
	hsa04973	Carbohydrate digestion and absorption	17/1699	47/8102	0.0116538	0.0616109	0.043434	5332/3099/5295/207/5291/83756/6523/776/80201/5330/5293/2542/93432/478/10000/483/8503	17
	hsa04115	p53 signaling pathway	24/1699	73/8102	0.0116816	0.0616109	0.043434	2810/7057/64065/894/1021/598/143686/4616/8795/3732/1643/472/898/27113/9133/5268/1111/10572/92344/891/51512/6241/3486/983	24
	hsa04380	Osteoclast differentiation	38/1699	128/8102	0.0119942	0.0622554	0.0438884	4286/7042/5879/5468/1513/1435/7046/3726/4688/3554/1540/5600/2354/5295/207/6850/4790/814/5291/7040/1535/2534/5293/5336/4982/9021/3690/8792/8061/10000/4773/29760/5530/8503/140885/126014/3725/2355	38
	hsa04912	GnRH signaling pathway	29/1699	93/8102	0.0131683	0.0640728	0.0451696	111/255189/3708/5332/1958/115/4215/5321/5600/3709/91860/5566/2776/4216/107/196883/6655/776/1956/5330/5567/109/5598/4214/4323/5337/113/3725/8605	29
	hsa04014	Ras signaling pathway	63/1699	232/8102	0.0134636	0.0640728	0.0451696	5228/255189/56034/4233/80310/115727/5879/2263/22808/8437/23179/1435/1969/8817/627/10681/5880/5321/91860/11145/5566/8399/5295/25/207/4790/10125/598/2323/5291/9610/1943/5906/10156/6655/1956/2260/100271927/2790/4915/5567/5293/5336/7422/2787/2254/1942/59345/10000/5337/27040/25759/5924/7039/8503/2549/2261/27/8605/1944/2113/399694/2247	63
	hsa04916	Melanogenesis	31/1699	101/8102	0.0134717	0.0640728	0.0451696	4286/8321/8325/111/7855/5332/115/8322/8324/7473/91860/5566/2771/2776/54361/64764/2535/6934/107/196883/7482/148327/5330/5567/109/2033/113/1906/2770/7483/8323	31
	hsa04270	Vascular smooth muscle contraction	39/1699	133/8102	0.0136034	0.0640728	0.0451696	111/255189/79784/5583/10203/3708/2983/4629/4660/5332/115/2768/5321/3709/91860/133/5566/8399/2776/4628/4882/183/107/196883/135/776/5330/5567/109/4638/59/136/5592/113/1906/8605/5581/6093/10398	39
	hsa00053	Ascorbate and aldarate metabolism	12/1699	30/8102	0.0136816	0.0640728	0.0451696	54576/54600/223/54659/54577/54579/54657/54575/54658/54578/219/217	12
	hsa04725	Cholinergic synapse	34/1699	113/8102	0.0136935	0.0640728	0.0451696	111/3784/3708/5332/115/10681/3709/5566/5295/207/2771/2776/814/5291/64764/43/107/196883/776/2790/148327/5330/1131/2534/5567/109/5293/3759/2787/59345/10000/113/8503/2770	34
	hsa04919	Thyroid hormone signaling pathway	36/1699	121/8102	0.0137159	0.0640728	0.0451696	3091/9882/652/6256/1827/113026/2626/5332/2648/5566/5295/489/207/8850/54361/9862/487/5291/4855/6513/2475/4851/5330/5567/5293/4854/5336/478/4853/3690/7068/10000/2033/483/23389/8503	36
	hsa00280	Valine, leucine and isoleucine degradation	17/1699	48/8102	0.0146043	0.0670289	0.0472536	5019/65985/259307/4329/223/593/10449/219/11112/36/3033/34/197322/18/1629/217/549	17
	hsa04921	Oxytocin signaling pathway	44/1699	154/8102	0.0147587	0.0670289	0.0472536	111/255189/1827/3708/2983/4660/5332/5021/115/5321/3709/91860/5566/2771/1938/2776/4882/814/784/107/196883/776/1956/5330/785/5567/109/5598/3759/4638/783/781/4773/113/27092/5530/2770/3725/8605/93589/8536/6263/6093/10398	44
	hsa00601	Glycosphingolipid biosynthesis - lacto and neolacto series	11/1699	27/8102	0.015453	0.0683605	0.0481923	2528/10331/6484/28/2526/2525/6487/10402/53947/8706/2683	11
	hsa05231	Choline metabolism in cancer	30/1699	98/8102	0.0154699	0.0683605	0.0481923	3091/255189/56034/1608/80310/5879/8613/5880/5321/10163/5295/56994/207/8395/56261/5291/1119/2475/6655/1956/1606/8611/5293/6581/10000/5337/10810/8503/3725/8605	30
	hsa04670	Leukocyte transendothelial migration	34/1699	114/8102	0.0156896	0.0684065	0.0482247	1364/9075/83692/137075/5879/1366/3689/7430/87/4688/7409/5880/5600/5295/90952/9080/2771/4478/83700/5291/9076/5906/1535/7852/1365/1500/5293/5336/3383/2909/8503/2770/6093/10398	34
	hsa05202	Transcriptional misregulation in cancer	53/1699	192/8102	0.0161275	0.0693906	0.0489185	4286/2119/4233/5468/6256/8091/8938/929/5327/894/4211/7102/3021/5087/3728/7850/6935/3695/1649/3087/4005/5218/3576/5090/1031/604/4790/330/2115/598/3398/3020/6692/4086/8842/861/4616/64332/7849/1643/472/9915/7403/51426/860/4298/8351/8861/7113/1051/8864/3486/85414	53

## Sheet: Table S3
Table S3. Significantly enriched Kyoto Encyclopedia of Genes and Genomes (KEGG) pathways of over representative genes in P68 cholangiocarcinoma organoids when compare to benign biliary organoids.
	ID	Description	GeneRatio	BgRatio	p value	p.adjust	q value	geneID	Count
	hsa05414	Dilated cardiomyopathy	30/943	96/8102	2.0718e-07	4.08218e-05	3.07311e-05	183/776/3695/7171/7042/8515/196883/111/3678/3694/115/3672/6443/487/27092/1756/109/7043/5567/7169/3688/782/93589/3908/781/7139/9254/3696/7134/785	30
	hsa04510	Focal adhesion	49/943	201/8102	2.52767e-07	4.08218e-05	3.07311e-05	5228/29780/595/7410/3912/80310/5058/2335/3695/1291/7423/7057/7422/8515/3480/3678/1287/894/3694/7094/4638/3672/23396/5604/25759/2317/83660/5155/1286/1288/1299/2534/858/87/7409/399694/9564/3688/5578/3908/3371/1285/56924/2318/3914/2316/3911/3696/10398	49
	hsa05410	Hypertrophic cardiomyopathy	28/943	90/8102	5.82762e-07	6.2744e-05	4.72344e-05	183/776/1906/3695/7171/7042/8515/3678/3694/3672/6443/487/27092/1756/7043/7169/3688/782/5563/93589/3908/781/1636/7139/9254/3696/7134/785	28
	hsa04261	Adrenergic signaling in cardiomyocytes	35/943	150/8102	3.56933e-05	0.00281777	0.00212125	183/154/776/468/493/7171/5600/196883/111/818/115/148327/5519/2770/9586/487/27092/109/6324/10411/5567/7169/5526/5523/5578/782/28227/93589/781/90993/483/7139/9254/7134/785	35
	hsa04512	ECM-receptor interaction	24/943	88/8102	4.36187e-05	0.00281777	0.00212125	3339/3912/80144/2335/3695/1291/7057/8515/255743/3678/1287/3694/3672/375790/1286/1288/1299/3688/3908/3371/1285/3914/3911/3696	24
	hsa04151	PI3K-Akt signaling pathway	66/943	354/8102	5.51731e-05	0.00297015	0.00223596	5228/5106/8817/595/468/1435/3912/598/1946/80310/2335/3695/1291/627/7423/7057/1027/7422/8515/3480/3678/1287/2065/894/3694/1969/10681/3672/148327/5519/2261/4915/9586/5604/9223/1021/3563/55970/4602/5155/7039/1942/1286/1288/1299/5526/9863/3688/5523/1978/5578/5563/28227/10018/118788/3908/3371/1285/90993/3914/2149/3911/54541/7099/3696/2784	66
	hsa05032	Morphine addiction	24/943	91/8102	7.84784e-05	0.00362122	0.00272609	5139/5142/5141/134/196883/5143/111/10681/115/2770/409/2869/55970/157/109/5140/5567/2550/50940/2562/5578/27115/5144/2784	24
	hsa04360	Axon guidance	39/943	182/8102	9.85841e-05	0.00398033	0.00299644	90249/5336/1946/10509/2051/5058/5362/4690/2049/1969/818/6405/5365/2770/10371/4776/658/64218/57715/23654/59277/6091/1942/54361/7976/2534/7869/54910/3688/2043/5578/25791/8482/10505/56924/7220/84448/3897/10398	39
	hsa04926	Relaxin signaling pathway	30/943	129/8102	0.000135074	0.00463466	0.00348902	4312/468/1906/5600/7423/7422/196883/111/1287/10681/115/148327/3640/2770/9586/5604/7046/409/25759/55970/109/1286/5567/1288/399694/5578/1285/90993/2769/2784	30
	hsa05205	Proteoglycans in cancer	42/943	205/8102	0.000156699	0.00463466	0.00348902	7078/7473/5336/3339/595/7410/3091/5058/2335/7476/5600/22808/7057/7042/7422/7430/7023/3480/3678/2065/1514/818/7477/5604/2317/3709/4478/54361/7976/5567/3708/858/7409/3688/2535/5578/51196/2318/2316/3059/7099/5328	42
	hsa00250	Alanine, aspartate and glutamate metabolism	13/943	37/8102	0.000161512	0.00463466	0.00348902	445/440/7915/2805/2752/2747/284716/8659/18/80150/435/1373/84706	13
	hsa00860	Porphyrin and chlorophyll metabolism	14/943	42/8102	0.000173589	0.00463466	0.00348902	3162/1356/54575/54577/54600/54579/54659/54657/54578/211/54576/2990/54658/645	14
	hsa00830	Retinol metabolism	19/943	68/8102	0.000189175	0.00463466	0.00348902	8854/220/54575/54577/54600/54579/54659/54657/54578/54576/54658/195814/216/157506/56603/9227/8630/10170/29785	19
	hsa05146	Amoebiasis	25/943	102/8102	0.000200883	0.00463466	0.00348902	3576/3912/2335/2767/7850/7042/1287/2774/2920/7043/1286/5567/1288/2919/87/5578/2921/3908/1285/3914/3911/3689/7099/2769/9630	25
	hsa00053	Ascorbate and aldarate metabolism	11/943	30/8102	0.000335879	0.00651087	0.00490145	54575/54577/54600/54579/54659/54657/54578/54576/2990/54658/219	11
	hsa04934	Cushing syndrome	33/943	155/8102	0.000374876	0.00651087	0.00490145	183/7473/595/776/468/7476/2767/1027/196883/111/5087/6667/818/115/148327/2770/9586/7477/5604/6934/1021/109/3709/54361/7976/5567/3708/8313/2535/50940/1031/83439/90993	33
	hsa04933	AGE-RAGE signaling pathway in diabetic complications	24/943	100/8102	0.000374885	0.00651087	0.00490145	4772/183/5336/595/3576/5292/2335/1906/5600/7423/4089/7042/1027/7422/7056/1287/7046/7043/1286/1288/5578/51196/3383/1285	24
	hsa05412	Arrhythmogenic right ventricular cardiomyopathy	20/943	77/8102	0.000377731	0.00651087	0.00490145	776/3695/8515/3678/3694/3672/6443/6934/487/27092/1756/3688/782/93589/3908/781/83439/9254/3696/785	20
	hsa04010	MAPK signaling pathway	54/943	294/8102	0.000382992	0.00651087	0.00490145	5228/4772/8817/776/468/1435/1649/2122/1946/80310/5058/627/5600/7423/22808/4137/1843/7042/7422/3480/2065/3306/1969/2261/27330/4915/5604/7046/409/27092/55970/2317/9448/7043/5155/7039/1942/5567/5321/1847/1647/80824/9479/5578/782/93589/1326/781/255189/2318/2316/11221/9254/785	54
	hsa00140	Steroid hormone biosynthesis	17/943	61/8102	0.000420514	0.0067913	0.00511257	54575/54577/54600/54579/54659/54657/54578/54576/1571/54658/6820/1109/374875/8644/79644/8630/3294	17
	hsa00220	Arginine biosynthesis	9/943	22/8102	0.000457728	0.00702202	0.00528626	445/100526760/95/2805/2752/2747/435/1373/84706	9
	hsa04390	Hippo signaling pathway	33/943	157/8102	0.00047828	0.00702202	0.00528626	7473/595/650/7476/4089/1490/7042/894/8945/4771/5519/7477/7046/6934/658/7043/154796/9231/54361/7976/4092/656/652/84962/7161/8313/2535/83439/353500/332/2736/3689/8463	33
	hsa04928	Parathyroid hormone synthesis, secretion and action	24/943	106/8102	0.000921955	0.0129475	0.00974698	2625/468/10893/2767/5142/5141/196883/5143/111/6667/115/148327/860/2770/9586/5604/409/109/3709/5567/3708/5578/5144/90993	24
	hsa04725	Cholinergic synapse	25/943	113/8102	0.00103972	0.0139929	0.010534	776/468/2767/196883/111/3759/10681/818/115/148327/2770/9586/5604/55970/109/3709/5567/2534/3708/5578/90993/43/9132/2784/1136	25
	hsa00040	Pentose and glucuronate interconversions	11/943	34/8102	0.00113509	0.0146653	0.0110402	54575/54577/54600/54579/54659/54657/54578/54576/2990/54658/9942	11
	hsa04310	Wnt signaling pathway	33/943	166/8102	0.00132201	0.0164234	0.0123637	4772/8549/54894/7473/4316/595/79816/166336/7476/84133/4089/10023/894/8945/818/2239/7477/23401/22943/4776/6934/6907/59343/54361/7976/5567/27130/8313/2535/5578/83439/7089/283106	33
	hsa05165	Human papillomavirus infection	57/943	331/8102	0.0013743	0.0164406	0.0123767	3106/7473/595/3912/4854/2335/7476/3695/1291/5734/10379/7057/1027/7422/8515/3678/1287/894/3694/3672/148327/5519/9586/7477/5604/9223/6934/4599/1021/4242/90423/84441/54361/1286/7976/5567/1288/1299/5526/3955/8313/3688/5523/1978/2535/28227/3908/3371/3135/1285/83439/90993/4851/3914/3911/4600/3696	57
	hsa04921	Oxytocin signaling pathway	31/943	154/8102	0.0014812	0.0170868	0.0128631	4772/595/776/2983/196883/111/3759/4638/818/115/2770/5604/4776/27092/109/3709/5567/5321/3708/5578/782/5563/5021/93589/781/255189/5997/9254/10398/4878/785	31
	hsa05225	Hepatocellular carcinoma	33/943	168/8102	0.00162985	0.0181532	0.0136659	7473/5336/3162/595/8110/598/7476/4089/10023/7042/3480/1643/4257/7477/5604/23401/7046/6934/1021/2938/25759/7043/7039/54361/1728/7976/399694/8313/1647/2535/5578/83439/2944	33
	hsa00983	Drug metabolism - other enzymes	19/943	80/8102	0.00168757	0.0181695	0.0136782	978/54575/54577/54600/54579/54659/7378/54657/54578/54576/1571/2990/54658/7498/9/4257/2938/1890/2944	19
	hsa04024	cAMP signaling pathway	40/943	216/8102	0.00180135	0.0187689	0.0141294	4772/10257/84152/154/7410/776/5139/27198/493/5058/1906/5142/627/5141/134/196883/5143/111/818/115/148327/2770/9586/5604/487/109/5140/51/10411/5567/7409/2550/51196/5021/5144/90993/2149/483/10398/4878	40
	hsa04924	Renin secretion	17/943	69/8102	0.00190401	0.0190893	0.0143707	183/154/776/5139/2983/1906/5734/134/111/3759/2770/3709/5140/5567/3708/1636/4878	17
	hsa01230	Biosynthesis of amino acids	18/943	75/8102	0.0019503	0.0190893	0.0143707	445/875/26227/440/6472/5831/1491/5723/100526760/95/29968/2805/2752/435/4144/1373/230/84706	18
	hsa04927	Cortisol synthesis and secretion	16/943	65/8102	0.00258466	0.0245542	0.0184847	183/776/468/2767/196883/111/5087/6667/115/148327/9586/109/3709/5567/3708/90993	16
	hsa04976	Bile secretion	20/943	90/8102	0.00301191	0.0277957	0.0209249	10257/54575/54577/54600/54579/54659/54657/57835/54578/54576/196883/6550/111/54658/115/109/6523/5567/8671/483	20
	hsa05202	Transcriptional misregulation in cancer	35/943	192/8102	0.00439992	0.039477	0.0297187	5327/5468/1649/3576/7849/598/8938/3695/5218/7850/8091/1027/3480/894/5087/7113/6667/3486/4286/1643/51804/55589/1051/8351/860/4211/85414/7185/4299/221037/1647/1031/8864/2118/5328	35
	hsa04918	Thyroid hormone synthesis	17/943	75/8102	0.00484596	0.0423039	0.0318468	468/7849/50506/2878/196883/111/53905/115/148327/9586/109/3709/5567/3708/5578/90993/483	17
	hsa04350	TGF-beta signaling pathway	20/943	94/8102	0.00509089	0.0432726	0.0325761	650/4089/7057/7042/79875/3625/6667/5519/7046/658/57154/7043/4092/93/656/652/83729/130399/353500/2200	20
	hsa04022	cGMP-PKG signaling pathway	31/943	167/8102	0.00541046	0.0439051	0.0330522	4772/154/776/5139/468/493/2983/2767/134/196883/111/4638/115/148327/2770/9586/5604/9569/4776/487/27094/109/3709/5140/3708/8654/90993/483/5997/10398/4878	31
	hsa04916	Melanogenesis	21/943	101/8102	0.0055085	0.0439051	0.0330522	7473/1906/7476/196883/111/4286/818/115/148327/2770/7477/5604/6934/109/54361/7976/5567/2535/5578/83439/90993	21
	hsa04670	Leukocyte transendothelial migration	23/943	114/8102	0.00557309	0.0439051	0.0330522	5336/7410/4267/1364/90952/5600/9075/100506658/7430/2770/4478/1366/10411/87/7409/1365/9564/3688/5578/83700/3383/3689/10398	23
	hsa04015	Rap1 signaling pathway	37/943	210/8102	0.00618166	0.0475399	0.0357885	5228/8817/7410/1435/1946/80310/5600/7423/22808/7057/7422/196883/111/3480/7094/1969/5909/115/2261/2770/5604/9223/9771/109/83660/5155/1942/51466/10411/7409/9863/9564/3688/5578/51196/2149/3689	37
	hsa04514	Cell adhesion molecules	28/943	149/8102	0.00671059	0.0504074	0.0379473	3106/4267/4897/1364/90952/3695/5797/9075/3109/1462/100506658/5819/5817/54413/23308/1366/23705/3123/1365/3688/83700/3383/29126/3135/3689/3897/3696/3384	28
	hsa04550	Signaling pathways regulating pluripotency of stem cells	27/943	143/8102	0.00720154	0.0528659	0.039798	5080/7473/7476/5600/4089/9314/6498/3625/84759/3480/2261/4211/7477/5604/658/54361/7976/93/652/8313/2535/3670/3572/6926/83729/130399/5013	27
	hsa04610	Complement and coagulation cascades	18/943	85/8102	0.00803982	0.057708	0.0434432	5327/3426/629/718/7056/5627/1191/1604/716/5265/5104/2153/7035/2161/2149/3689/5328/5624	18
	hsa01521	EGFR tyrosine kinase inhibitor resistance	17/943	79/8102	0.00836238	0.0577504	0.0434751	2621/5336/598/80310/7422/3480/2065/2261/5604/25759/5155/7039/558/399694/1978/5578/10018	17
	hsa04915	Estrogen signaling pathway	26/943	138/8102	0.00849652	0.0577504	0.0434751	468/196883/111/3306/6667/115/148327/2770/9586/5604/25759/109/3709/7039/25984/5567/3875/3708/399694/2550/3860/2852/7031/3872/90993/10499	26
	hsa05222	Small cell lung cancer	19/943	92/8102	0.00866808	0.0577504	0.0434751	595/3912/598/2335/1027/1163/1287/1643/1021/1286/1288/7185/3688/1647/3908/1285/3914/3911/5915	19
	hsa05030	Cocaine addiction	12/943	49/8102	0.00890963	0.0577504	0.0434751	84152/468/627/111/148327/4128/2770/9586/5567/26086/90993/2354	12
	hsa04911	Insulin secretion	18/943	86/8102	0.00909565	0.0577504	0.0434751	776/468/2767/196883/111/818/115/148327/3651/9586/27094/109/5864/5567/6804/5578/90993/483	18
	hsa04668	TNF signaling pathway	22/943	112/8102	0.00911848	0.0577504	0.0434751	468/1435/9021/8809/1906/5600/148327/1051/9586/6364/5604/153090/7128/8837/2920/7185/2919/197259/2921/3383/1326/90993	22
	hsa04935	Growth hormone synthesis, secretion and action	23/943	119/8102	0.00947384	0.0583164	0.0439012	5336/776/468/9021/2767/5600/196883/111/3486/115/148327/2770/9586/5604/25759/109/3709/5567/3708/399694/9564/5578/90993	23
	hsa01040	Biosynthesis of unsaturated fatty acids	8/943	27/8102	0.00956894	0.0583164	0.0439012	6319/79966/3992/51/11332/79071/79993/9415	8

## Sheet: Table S4
Table S4. Significantly enriched gene ontology (GO) terms of over representative features in P68 cholangiocarcinoma compared to normal biliary tissues.
	ONTOLOGY	ID	Description	GeneRatio	BgRatio	p value	p.adjust	q value	geneID	Count
	BP	GO:1990778	protein localization to cell periphery	123/3670	340/18866	2.73735e-13	2.66782e-09	2.23944e-09	EPHB2/S100A10/PKP3/ARHGAP44/RAB40B/PTCH1/MISP/VIL1/GAS6/PRKCH/ITGA3/LRP1/CIB1/EZR/EPHA2/KRT18/GOLPH3/P2RY1/STAC/ANXA2/RILPL2/PRNP/SLC9A3R2/LDLRAP1/JUP/MYO5A/GPC4/CNPY4/WDR72/CLSTN1/RAB3A/DLG4/PIK3R1/AKT1/TMBIM1/TUB/NECTIN3/ATP2C2/LGALS3/PDZD11/RAB40C/GGA3/BCL2L1/RAB8B/CD81/PDZD3/C16orf70/VAMP8/NUMB/CCDC88A/ZDHHC7/BBS2/KIF1B/DLG2/ARL3/CACNB3/ZFYVE27/SORBS1/CSK/RAB11FIP2/SEC16A/TTC7B/KCNIP3/DAB2/ST…	123
	BP	GO:0072659	protein localization to plasma membrane	105/3670	281/18866	1.52042e-12	7.40902e-09	6.21933e-09	EPHB2/S100A10/PKP3/ARHGAP44/RAB40B/PTCH1/VIL1/GAS6/PRKCH/ITGA3/LRP1/CIB1/EZR/EPHA2/KRT18/GOLPH3/P2RY1/STAC/ANXA2/RILPL2/PRNP/SLC9A3R2/LDLRAP1/JUP/MYO5A/CNPY4/WDR72/RAB3A/PIK3R1/AKT1/TMBIM1/NECTIN3/ATP2C2/LGALS3/RAB40C/GGA3/BCL2L1/RAB8B/CD81/PDZD3/C16orf70/VAMP8/NUMB/CCDC88A/ZDHHC7/BBS2/CACNB3/ZFYVE27/SORBS1/CSK/RAB11FIP2/SEC16A/TTC7B/KCNIP3/DAB2/STXBP1/AMN/PACS2/ZDHHC23/STX4/DCHS1/RAP1A/TGFB1/VAM…	105
	BP	GO:0003279	cardiac septum development	53/3670	114/18866	5.26421e-11	1.2831e-07	1.07707e-07	FZD1/TGFB2/BMP4/ENG/SMAD4/FGFR2/TBX3/CCN1/HEG1/GATA4/TGFBR1/NDST1/MKS1/LUZP1/SMAD7/NRP1/AP2B1/SUFU/ROBO1/DNAH11/GATA3/PLXND1/STRA6/LTBP1/SAV1/TRIP11/MYH10/PROX1/ID2/TGFBR3/CRELD1/ISL1/FZD2/ACVR1/SLIT2/EGLN1/PAX8/LMO4/NRP2/NOTCH1/PRDM1/JAG1/RARB/CITED2/HECTD1/NOTCH2/BMPR2/PARVA/SMO/ZFPM1/PCSK5/FGFRL1/ADAMTS6	53
	BP	GO:0030198	extracellular matrix organization	131/3670	395/18866	5.43082e-11	1.2831e-07	1.07707e-07	MMP1/LAMC2/COL6A1/FBLN5/COL4A4/TGFB2/HTRA1/ADAM15/ERO1A/ADAMTSL5/GAS6/MMP15/ITGA3/ENG/LRP1/THBS1/CTSK/CCN1/ITGB2/EMILIN1/ITGB4/SLC39A8/MIA/CSGALNACT1/ANXA2/MYH11/COL4A5/LAMB3/MFAP4/TGFBR1/COL4A3/SPINT2/LCP1/SH3PXD2A/GFOD2/ICAM3/ADAMTS15/CRISPLD2/VCAN/CCDC80/LAMA2/WDR72/ITGB7/SMAD3/LAMB1/COL12A1/ITGB6/FBN1/TLL2/CYP1B1/TNXB/ANTXR1/COL1A1/ABL1/NTN4/CTSS/COL16A1/LAMA3/CTSL/ERO1B/APP/CST3/COL6A3/TIMP2…	131
	BP	GO:0043062	extracellular structure organization	131/3670	396/18866	6.58268e-11	1.2831e-07	1.07707e-07	MMP1/LAMC2/COL6A1/FBLN5/COL4A4/TGFB2/HTRA1/ADAM15/ERO1A/ADAMTSL5/GAS6/MMP15/ITGA3/ENG/LRP1/THBS1/CTSK/CCN1/ITGB2/EMILIN1/ITGB4/SLC39A8/MIA/CSGALNACT1/ANXA2/MYH11/COL4A5/LAMB3/MFAP4/TGFBR1/COL4A3/SPINT2/LCP1/SH3PXD2A/GFOD2/ICAM3/ADAMTS15/CRISPLD2/VCAN/CCDC80/LAMA2/WDR72/ITGB7/SMAD3/LAMB1/COL12A1/ITGB6/FBN1/TLL2/CYP1B1/TNXB/ANTXR1/COL1A1/ABL1/NTN4/CTSS/COL16A1/LAMA3/CTSL/ERO1B/APP/CST3/COL6A3/TIMP2…	131
	BP	GO:0051056	regulation of small GTPase mediated signal transduction	111/3670	323/18866	1.49655e-10	2.4309e-07	2.04057e-07	EPHB2/FGD3/LPAR1/TGFB2/ARHGAP44/AUTS2/MET/RAP1GAP/EPS8L3/ITGA3/RASGRP4/RAC1/PSD/KANK2/RASAL1/ARHGEF28/SRGAP3/CSF1/HEG1/DLC1/ARHGEF17/SIPA1L1/ARHGEF5/MAPRE2/VAV1/RAC2/ARHGEF3/LYN/RHOD/FBXO8/NRP1/LRRC59/GPR35/TIAM2/MAPKAP1/ROBO1/ABL1/EPS8L1/DAB2IP/BCL6/IQSEC1/FGD2/RASGRP1/KCTD13/ADGRG1/CYTH4/RHOV/TIMP2/RAPGEF1/ARHGEF19/EPS8L2/SPRY1/ITPKB/CGNL1/ARHGEF2/ARHGEF26/SLIT2/CHN1/RHOC/NGEF/STARD13/F2R/MFN2/…	111
	BP	GO:0003205	cardiac chamber development	70/3670	174/18866	1.84186e-10	2.5644e-07	2.15262e-07	FZD1/CPE/HIF1A/TGFB2/BMP4/ENG/DSP/SMAD4/FGFR2/RXRA/TBX3/CCN1/HEG1/GREB1L/GATA4/SMARCD3/TGFBR1/NDST1/FOXH1/MKS1/LUZP1/SMAD7/NRP1/AP2B1/ARID1A/SUFU/ROBO1/DNAH11/GATA3/PLXND1/PPP1R13L/UBE4B/STRA6/LTBP1/SAV1/TRIP11/MYH10/PROX1/ID2/ADAMTS1/TGFBR3/CRELD1/ISL1/FZD2/ACVR1/SLIT2/EGLN1/PAX8/LMO4/TGFB1/TNNT2/NRP2/NOTCH1/PRDM1/TPM1/TNNI1/JAG1/RARB/CITED2/HECTD1/NOTCH2/BMPR2/PARVA/TBX6/SMO/ZFPM1/PCSK5/FGFRL1/…	70
	BP	GO:0007411	axon guidance	100/3670	284/18866	2.63475e-10	2.59296e-07	2.1766e-07	EPHB2/SEMA4B/EPHB3/MATN2/LAMC2/VLDLR/PTCH1/PTPRM/RAP1GAP/GRB7/CELSR3/PLXNC1/LRP1/SMAD4/RAC1/UNC5B/EZR/EPHA2/UNC5A/PALLD/EPHA10/GPC1/MYCBP2/SEMA4D/SEMA4A/BDNF/RAC2/EPHA4/SCN1B/WNT3/SEMA3F/LAMA2/NRP1/BOC/NRCAM/EGR2/ERBB2/PLA2G10/ROBO1/PIK3R1/BMPR1B/SEMA4G/GATA3/IGSF9/PLXND1/EXT1/PTPRA/ETV1/NTN4/PLXNB1/MYH10/LAMA3/APP/FLRT3/SHANK3/APBB2/ISL1/PIK3CB/SPTB/LGR6/SLIT2/CHN1/NPTN/MEGF8/GLI2/EFNA2/SEMA3A/N…	100
	BP	GO:0061448	connective tissue development	94/3670	262/18866	2.88768e-10	2.59296e-07	2.1766e-07	CHST11/HIF1A/BMP4/PDGFD/RORC/AXIN2/CTSK/CSF1/CCN1/HMGA2/PPARGC1A/CSGALNACT1/EFEMP1/TGFBR1/FGF18/EGR1/OXCT1/SLC39A14/OSR1/FTO/XBP1/IL6R/KAT2A/SMAD7/AACS/ZEB1/ANXA6/PLAAT3/SMAD3/LRP5/BMPR1B/HYAL2/COL1A1/POC1A/CHSY1/TRIP11/ID2/RFLNA/BBS2/ARID5B/SMAD1/RUNX1/GLG1/CREB3L2/SCIN/MKKS/SPTLC2/SLC25A25/CCN3/GLI2/SELENOM/GLI3/LTBP3/TGFB1/CCN2/NOTCH1/WNT2B/CRIP1/FGFR1/EIF2AK3/MEX3C/SH3PXD2B/PITX1/SNORC/SORL1/…	94
	BP	GO:0001655	urogenital system development	112/3670	330/18866	2.89496e-10	2.59296e-07	2.1766e-07	EPHB2/OVOL1/PGF/TMED10/EPHB3/EPCAM/TACSTD2/NFIA/COL4A4/TGFB2/KIF26B/GCNT1/PTCH1/FRAS1/BMP4/TNS2/ALDH1A2/PDGFD/ITGA3/CAT/SMAD4/FGFR2/PODXL/KANK2/TFAP2A/RXRA/GREB1L/TGFBR1/COL4A3/EGR1/NUP85/PBX1/BDNF/OSR1/KLF15/EPHA4/CA2/IL6R/SMAD7/WNK4/NRP1/FAT4/MTSS1/SMAD3/FBN1/FKBP4/HYAL2/PKD2/GATA3/GCNT4/DLL1/STRA6/PROX1/SERPINF1/ID2/CTSH/WNT4/RPGRIP1L/ADAMTS1/GDF11/ARID5B/SMAD1/TBX18/SGPL1/AGT/PROM1/LGR4/ARL3/…	112
	BP	GO:0072001	renal system development	102/3670	292/18866	2.92659e-10	2.59296e-07	2.1766e-07	OVOL1/PGF/TMED10/EPCAM/TACSTD2/NFIA/COL4A4/TGFB2/KIF26B/GCNT1/PTCH1/FRAS1/BMP4/TNS2/ALDH1A2/PDGFD/ITGA3/CAT/SMAD4/FGFR2/PODXL/KANK2/TFAP2A/GREB1L/TGFBR1/COL4A3/EGR1/NUP85/PBX1/BDNF/OSR1/KLF15/EPHA4/CA2/IL6R/SMAD7/WNK4/NRP1/FAT4/MTSS1/SMAD3/FBN1/HYAL2/PKD2/GATA3/GCNT4/DLL1/STRA6/PROX1/SERPINF1/ID2/CTSH/WNT4/RPGRIP1L/ADAMTS1/GDF11/ARID5B/SMAD1/TBX18/SGPL1/AGT/PROM1/LGR4/ARL3/SPRY1/SLIT2/GLI2/PAX8/D…	102
	BP	GO:0097485	neuron projection guidance	100/3670	285/18866	3.2925e-10	2.67406e-07	2.24468e-07	EPHB2/SEMA4B/EPHB3/MATN2/LAMC2/VLDLR/PTCH1/PTPRM/RAP1GAP/GRB7/CELSR3/PLXNC1/LRP1/SMAD4/RAC1/UNC5B/EZR/EPHA2/UNC5A/PALLD/EPHA10/GPC1/MYCBP2/SEMA4D/SEMA4A/BDNF/RAC2/EPHA4/SCN1B/WNT3/SEMA3F/LAMA2/NRP1/BOC/NRCAM/EGR2/ERBB2/PLA2G10/ROBO1/PIK3R1/BMPR1B/SEMA4G/GATA3/IGSF9/PLXND1/EXT1/PTPRA/ETV1/NTN4/PLXNB1/MYH10/LAMA3/APP/FLRT3/SHANK3/APBB2/ISL1/PIK3CB/SPTB/LGR6/SLIT2/CHN1/NPTN/MEGF8/GLI2/EFNA2/SEMA3A/N…	100
	BP	GO:0002064	epithelial cell development	82/3670	221/18866	6.15727e-10	4.61606e-07	3.87484e-07	SPDEF/HIF1A/PPP1R16B/MET/SFN/CDSN/PTPRS/BMP4/ENG/FRMD6/PODXL/FLNB/HEG1/EZR/EPHA2/PALLD/RILPL2/SLITRK6/SPINT2/CLIC4/XBP1/RAB25/CDK6/CCDC88C/ONECUT2/DLL1/TRIOBP/SLC4A7/TBC1D20/ARNTL/PROX1/IL6ST/CST3/MSN/HSD17B4/RAPGEF1/ARHGEF26/PSAP/NOTCH4/CLDN1/RAP1A/S1PR3/NOTCH1/FGFR1/CXCR4/CLDN3/ARID4A/MYO1E/TMOD1/FLNA/PRDM1/PROC/S1PR2/GSTM3/JAG1/VEGFA/RARB/PAX6/NOTCH2/LHFPL5/BFSP1/ACTA2/ICAM1/MYO7A/FAT1/RAPGEF2…	82
	BP	GO:0046578	regulation of Ras protein signal transduction	74/3670	194/18866	1.00223e-09	6.97698e-07	5.85666e-07	EPHB2/LPAR1/TGFB2/ARHGAP44/AUTS2/MET/EPS8L3/ITGA3/RASGRP4/RAC1/PSD/KANK2/RASAL1/ARHGEF28/CSF1/HEG1/DLC1/MAPRE2/VAV1/ARHGEF3/LYN/FBXO8/NRP1/LRRC59/GPR35/MAPKAP1/ROBO1/ABL1/EPS8L1/DAB2IP/BCL6/IQSEC1/RASGRP1/KCTD13/ADGRG1/CYTH4/TIMP2/RAPGEF1/EPS8L2/SPRY1/ITPKB/ARHGEF2/STARD13/F2R/MFN2/RASA4/OPHN1/SPRY2/NOTCH1/SGSM3/RASA4B/FBP1/SH3BP1/ARHGAP42/FOXM1/EPOR/DENND4A/EPS8/ARFGEF3/MYO9B/STMN3/CCDC125/NOTCH…	74
	BP	GO:0001822	kidney development	98/3670	283/18866	1.10713e-09	7.1934e-07	6.03834e-07	OVOL1/PGF/TMED10/EPCAM/TACSTD2/COL4A4/TGFB2/KIF26B/GCNT1/PTCH1/FRAS1/BMP4/TNS2/ALDH1A2/PDGFD/ITGA3/CAT/SMAD4/FGFR2/PODXL/KANK2/TFAP2A/GREB1L/TGFBR1/COL4A3/EGR1/NUP85/PBX1/BDNF/OSR1/KLF15/EPHA4/CA2/IL6R/SMAD7/WNK4/NRP1/FAT4/MTSS1/SMAD3/FBN1/HYAL2/PKD2/GATA3/GCNT4/DLL1/STRA6/PROX1/SERPINF1/ID2/CTSH/WNT4/RPGRIP1L/ADAMTS1/GDF11/ARID5B/SMAD1/SGPL1/AGT/PROM1/LGR4/ARL3/SPRY1/SLIT2/GLI2/PAX8/DCHS1/GZF1/S…	98
	BP	GO:0032970	regulation of actin filament-based process	128/3670	405/18866	2.844e-09	1.73235e-06	1.45418e-06	IQANK1/LPAR1/S100A10/TACSTD2/DSC2/ARHGAP44/LIMCH1/VILL/MET/BAIAP2L1/VIL1/PPM1F/LRP1/DSP/SMAD4/RAC1/FRMD6/DLC1/ASAP3/WASH6P/ADORA1/SRI/ARHGEF5/GATA4/TGFBR1/CORO1A/JUP/RAC2/PTGER4/SYNPO/HCLS1/RHOD/CFL2/NRP1/TMSB10/WASF2/PDE4B/TGFB3/SMAD3/CAPZB/SMIM22/PIK3R1/IQGAP2/ESAM/ABL1/COTL1/ARHGEF10L/TRIOBP/FCHSD2/DSG2/DIXDC1/SWAP70/PROX1/FHOD3/WNT4/CCDC88A/SHANK3/JAM3/CDC42EP3/ARHGEF19/ATP2A1/RNF207/PDXP/SCI…	128
	BP	GO:0060562	epithelial tube morphogenesis	109/3670	331/18866	3.4675e-09	1.9879e-06	1.66869e-06	PGF/FZD1/ETV5/PRICKLE1/TACSTD2/HIF1A/TGFB2/KIF26B/PTCH1/MET/BMP4/ENG/SMAD4/FGFR2/PODXL/TBX3/CSF1/DLC1/EPHA2/GREB1L/GATA4/PBX1/SPINT2/FOXH1/OSR1/CLIC4/EPHA4/MKS1/LUZP1/KAT2A/WNK4/NRP1/COBL/ADM/FAT4/VDR/MTSS1/ARID1A/SUFU/SMAD3/PRKACA/LRP5/PKD2/GATA3/ABL1/PLXND1/DLL1/PROX1/CTSH/WNT4/BCL10/SPINT1/AGT/CC2D2A/ESRP2/LGR4/MTHFR/RNF207/SPRY1/BBS5/FZD2/IFT52/NRARP/ACVR1/MKKS/NOTCH4/SLIT2/STARD13/MEGF8/GLI2…	109
	BP	GO:0051017	actin filament bundle assembly	62/3670	157/18866	4.67195e-09	2.5296e-06	2.12342e-06	LPAR1/S100A10/TACSTD2/LIMCH1/MET/BAIAP2L1/VIL1/PPM1F/RAC1/EZR/DLC1/ASAP3/ACTN1/ARHGEF5/TGFBR1/LCP1/PTGER4/SYNPO/RHOD/NRP1/WASF2/TGFB3/SMAD3/PIK3R1/ABL1/ARHGEF10L/KCTD13/SWAP70/WNT4/CCDC88A/SHANK3/ESPN/SORBS1/PDXP/CGNL1/MKKS/RHOC/MTOR/FAM171A1/PDLIM1/CCN2/EPHA1/SH3PXD2B/AIF1L/NEDD9/FLNA/FSCN1/FSCN2/TPM1/FHOD1/EPS8/EVL/MYO1B/SPIRE2/ARHGEF18/ALMS1/PHACTR1/ID1/SERPINF2/RDX/BAIAP2L2/ROCK1	62
	BP	GO:0061572	actin filament bundle organization	63/3670	161/18866	5.37913e-09	2.75921e-06	2.31615e-06	LPAR1/S100A10/TACSTD2/LIMCH1/MET/BAIAP2L1/VIL1/PPM1F/RAC1/EZR/DLC1/ASAP3/ACTN1/ARHGEF5/TGFBR1/LCP1/PTGER4/SYNPO/RHOD/NRP1/WASF2/TGFB3/SMAD3/PIK3R1/ABL1/ARHGEF10L/KCTD13/SWAP70/WNT4/RFLNA/CCDC88A/SHANK3/ESPN/SORBS1/PDXP/CGNL1/MKKS/RHOC/MTOR/FAM171A1/PDLIM1/CCN2/EPHA1/SH3PXD2B/AIF1L/NEDD9/FLNA/FSCN1/FSCN2/TPM1/FHOD1/EPS8/EVL/MYO1B/SPIRE2/ARHGEF18/ALMS1/PHACTR1/ID1/SERPINF2/RDX/BAIAP2L2/ROCK1	63
	BP	GO:0050769	positive regulation of neurogenesis	146/3670	485/18866	8.60225e-09	3.88562e-06	3.26169e-06	EPHB2/FZD1/ETV5/LPAR1/VLDLR/HIF1A/SYT17/BMP4/PRKCH/PLXNC1/ITGA3/LRP8/LRP1/CAPRIN2/PPARG/ENC1/RASAL1/DISC1/CSF1/NEGR1/ARSB/RETREG3/DKK1/SEMA4D/SMARCD3/MYB/BDNF/CRTC1/ROR1/TLR2/FZD4/EPHA4/SCN1B/LYN/WNT3/ZEB1/NRP1/COBL/NRCAM/EGR2/TIAM2/DDX56/SYT1/ROBO1/DLG4/P3H1/DAB2IP/PLXND1/CNTN1/BCL6/PLXNB1/PRKD1/PROX1/SERPINF1/IL6ST/PTK6/ID2/CYB5D2/NUMB/TIMP2/SCARF1/SHANK3/NME2/TCF12/RAPGEF1/TRAK1/SPINT1/TRIM32/…	146
	BP	GO:0043087	regulation of GTPase activity	145/3670	481/18866	8.74356e-09	3.88562e-06	3.26169e-06	PTPRN2/EPHB3/FGD3/SNX18/S100A10/PLEKHG6/ARHGAP44/DOCK8/ALDH1A1/TBC1D4/RAP1GAP/PLXNC1/RIC8B/RASAL1/SRGAP3/TBC1D2B/DLC1/ASAP3/EPHA2/SH3BP4/SIPA1L1/SEMA4D/ARHGEF5/TBC1D13/MAPRE2/VAV1/RSU1/GNB5/EPHA4/ALS2CL/DOCK11/NRP1/RGS5/ADAP1/TIAM2/ERBB2/RGP1/TBC1D10C/IQGAP2/MTSS2/DAB2IP/DOCK9/PLXND1/RGL3/BCL6/SMAP2/SEC23B/ARHGEF10L/IQSEC1/FGD2/TBC1D20/RGS3/GNAQ/RASGRP1/PLXNB1/FGD6/TBC1D8/EVI5L/ARHGAP27/GIT2/WNT4…	145
	BP	GO:0001503	ossification	128/3670	412/18866	9.09185e-09	3.88562e-06	3.26169e-06	FZD1/COL6A1/HIF1A/TGFB2/WWOX/PTCH1/BMP4/ADRB2/SIRT7/CAT/TUFT1/FGFR2/KREMEN1/FAM20C/AXIN2/TFAP2A/CTSK/CSF1/CCN1/EPHA2/CSGALNACT1/TMEM64/DKK1/SEMA4D/JUNB/FGF18/H3-3B/PBX1/OSR1/PTGER4/VCAN/CLIC1/WNT3/IL6R/SMAD7/LRP3/CDK6/FAT4/EGR2/TGFB3/SUFU/SMAD3/PRKACA/LRP5/BMPR1B/COL1A1/AKT1/RRBP1/ZHX3/EXT1/OSTF1/CHSY1/PLXNB1/PRKD1/IL6ST/ID2/TOB2/RASSF2/SUN1/NPR2/H3-3A/WNT4/RFLNA/TOB1/HSD17B4/SMAD1/BCOR/RUNX1/LGR…	128
	BP	GO:0002062	chondrocyte differentiation	47/3670	108/18866	9.16983e-09	3.88562e-06	3.26169e-06	CHST11/BMP4/AXIN2/HMGA2/EFEMP1/TGFBR1/FGF18/SLC39A14/OSR1/SMAD7/ANXA6/SMAD3/BMPR1B/POC1A/CHSY1/TRIP11/RFLNA/RUNX1/GLG1/CREB3L2/SCIN/CCN3/GLI2/GLI3/LTBP3/TGFB1/CCN2/WNT2B/FGFR1/EIF2AK3/MEX3C/PKDCC/RUNX2/RARB/TGFBI/FGF9/MEF2D/TRPS1/BMPR2/SOX6/MUSTN1/FGFR3/WNT9A/ADAMTS7/SERPINH1/MDK/COL27A1	47
	BP	GO:0007409	axonogenesis	145/3670	482/18866	1.01433e-08	4.11904e-06	3.45764e-06	EPHB2/SEMA4B/EPHB3/MATN2/LAMC2/S100A6/VLDLR/AUTS2/PTCH1/PTPRM/PTPRS/RAP1GAP/GRB7/CELSR3/PLXNC1/LRP1/SMAD4/RAC1/FGFR2/DISC1/UNC5B/EZR/EPHA2/UNC5A/PALLD/EPHA10/GPC1/SIPA1L1/MYCBP2/SEMA4D/MAP1A/SLITRK6/ATL1/SEMA4A/BDNF/RAC2/UST/XK/EPHA4/SCN1B/WNT3/SEMA3F/LAMA2/NRP1/COBL/BOC/NRCAM/EGR2/TIAM2/ERBB2/PLA2G10/ROBO1/RAB3A/PIK3R1/BMPR1B/SEMA4G/GATA3/ABL1/IGSF9/PLXND1/EXT1/PARD6B/PTPRA/ETV1/NTN4/PLXNB1/MYH1…	145
	BP	GO:0051058	negative regulation of small GTPase mediated signal transduction	31/3670	59/18866	1.39538e-08	5.43973e-06	4.56626e-06	EPHB2/TGFB2/ARHGAP44/MET/ITGA3/RASAL1/HEG1/DLC1/MAPKAP1/DAB2IP/BCL6/KCTD13/TIMP2/RAPGEF1/SPRY1/CGNL1/SLIT2/MFN2/RASA4/SPRY2/RASA4B/FBP1/SH3BP1/ARHGAP42/STMN3/CCDC125/SPRY3/ARHGAP35/SPRY4/CD2AP/ABL2	31
	BP	GO:0031346	positive regulation of cell projection organization	122/3670	394/18866	2.49068e-08	9.18334e-06	7.70874e-06	FZD1/LPAR1/VLDLR/SYT17/AUTS2/VIL1/EPS8L3/PLXNC1/ITGA3/LRP8/LRP1/RAC1/CAPRIN2/ENC1/RASAL1/DISC1/NEGR1/ARSB/RETREG3/SEMA4D/TGFBR1/DNM3/BDNF/MIEN1/RAC2/CRTC1/ROR1/FZD4/PLEK2/EPHA4/SCN1B/LYN/WNT3/DOCK11/KAT2A/NRP1/COBL/WASF2/TIAM2/TGFB3/DDX56/SYT1/ROBO1/DLG4/P3H1/EPS8L1/DAB2IP/PLXND1/CNTN1/PLXNB1/PRKD1/RAB8B/SERPINF1/PTK6/DEF8/LCN2/SCARF1/CCDC88A/SHANK3/NME2/RAPGEF1/TRAK1/CDC42EP3/AGT/ANLN/ESPN/MARK2…	122
	BP	GO:0048732	gland development	134/3670	443/18866	2.54412e-08	9.18334e-06	7.70874e-06	PTPN3/EPHB3/ETV5/HIF1A/TGFB2/PTCH1/MET/BMP4/ALDH1A2/SMAD4/FGFR2/CDK5RAP3/RXRA/TBX3/CSF1/TGM2/EPHA2/LSR/TGFBR1/MST1L/OXTR/PBX1/ELF5/XBP1/WNT3/AACS/NRP1/COBL/VDR/TGFB3/CEBPG/SMAD3/HK2/ROBO1/ONECUT2/FA2H/LRP5/FKBP4/PKD2/PHF2/GATA3/ABL1/AKT1/PLXND1/ATP2C2/STRA6/NTN4/PROX1/SERPINF1/ID2/UGT1A1/ZBTB7B/ZBTB1/CST3/MSN/WNT4/RPGRIP1L/FPGS/ARID5B/ESRP2/TGFBR3/SRP54/ISL1/MST1/BTBD7/PSAP/NOTCH4/CLDN1/NME1/GLI2…	134
	BP	GO:0003281	ventricular septum development	36/3670	76/18866	3.42823e-08	1.19327e-05	1.00166e-05	FZD1/TGFB2/BMP4/SMAD4/FGFR2/TBX3/CCN1/HEG1/GATA4/TGFBR1/LUZP1/SMAD7/AP2B1/SUFU/ROBO1/GATA3/STRA6/LTBP1/SAV1/TRIP11/PROX1/ID2/TGFBR3/FZD2/ACVR1/SLIT2/EGLN1/PAX8/LMO4/NOTCH1/PRDM1/CITED2/HECTD1/BMPR2/ZFPM1/FGFRL1	36
	BP	GO:0001763	morphogenesis of a branching structure	72/3670	201/18866	3.63428e-08	1.22137e-05	1.02525e-05	PGF/ETV5/TACSTD2/PTCH1/MET/FZD5/BMP4/ENG/SMAD4/FGFR2/RXRA/TBX3/CSF1/TGM2/EPHA2/GREB1L/PBX1/SPINT2/CLIC4/MKS1/NRP1/ADM/FAT4/VDR/RERE/LRP5/PKD2/ABL1/PLXND1/NTN4/PROX1/BCL11A/CTSH/WNT4/SPINT1/AGT/ESRP2/LGR4/SPRY1/BTBD7/NRARP/ACVR1/NOTCH4/SLIT2/GLI2/PAX8/SEMA3A/DCHS1/GZF1/SHH/GLI3/SPRY2/NOTCH1/WNT2B/FGFR1/PRDM1/CTNNBIP1/NPNT/PKD1/MAP3K13/SEMA3E/VEGFA/SOCS3/NKX3-1/MMP14/LRP6/COL4A1/SMO/EDN1/TNC/MDK/FG…	72
	BP	GO:0003007	heart morphogenesis	87/3670	258/18866	3.82119e-08	1.24138e-05	1.04205e-05	FZD1/CPE/HIF1A/TGFB2/PTCH1/ADAM15/BMP4/ALDH1A2/ZMIZ1/ENG/DSP/SMAD4/FGFR2/AXIN2/RXRA/TBX3/CCN1/HEG1/DLC1/DKK1/GATA4/SMARCD3/TGFBR1/FOXH1/MKS1/SMAD7/NRP1/FAT4/SUFU/SMAD3/ROBO1/DNAH11/PKD2/GATA3/PLXND1/PPP1R13L/DLL1/UBE4B/SAV1/PROX1/ID2/ADAMTS1/TGFBR3/ISL1/RNF207/SPRY1/BBS5/FZD2/IFT52/ACVR1/MKKS/SLIT2/EGLN1/PDCD4/MEGF8/ARL13B/MTOR/FOLR1/DCHS1/SHH/TGFB1/TBX19/TNNT2/NRP2/NOTCH1/KDM6A/TPM1/TNNI1/NPY1R/…	87
	BP	GO:0061138	morphogenesis of a branching epithelium	68/3670	187/18866	4.38655e-08	1.37907e-05	1.15763e-05	PGF/ETV5/TACSTD2/PTCH1/MET/FZD5/BMP4/ENG/SMAD4/FGFR2/RXRA/TBX3/CSF1/TGM2/EPHA2/GREB1L/PBX1/SPINT2/CLIC4/MKS1/NRP1/ADM/FAT4/VDR/LRP5/PKD2/ABL1/PLXND1/NTN4/PROX1/CTSH/WNT4/SPINT1/AGT/ESRP2/LGR4/SPRY1/BTBD7/NRARP/ACVR1/NOTCH4/SLIT2/GLI2/PAX8/SEMA3A/DCHS1/GZF1/SHH/GLI3/SPRY2/NOTCH1/WNT2B/FGFR1/CTNNBIP1/NPNT/PKD1/SEMA3E/VEGFA/SOCS3/NKX3-1/MMP14/LRP6/COL4A1/SMO/EDN1/TNC/MDK/FGF2	68
	BP	GO:0003231	cardiac ventricle development	52/3670	131/18866	6.50414e-08	1.98092e-05	1.66283e-05	FZD1/CPE/HIF1A/TGFB2/BMP4/ENG/DSP/SMAD4/FGFR2/RXRA/TBX3/CCN1/HEG1/GREB1L/GATA4/SMARCD3/TGFBR1/FOXH1/LUZP1/SMAD7/AP2B1/SUFU/ROBO1/GATA3/PPP1R13L/UBE4B/STRA6/LTBP1/SAV1/TRIP11/PROX1/ID2/TGFBR3/ISL1/FZD2/ACVR1/SLIT2/EGLN1/PAX8/LMO4/TGFB1/TNNT2/NOTCH1/PRDM1/TPM1/TNNI1/JAG1/CITED2/HECTD1/BMPR2/ZFPM1/FGFRL1	52
	BP	GO:0032956	regulation of actin cytoskeleton organization	112/3670	360/18866	6.98982e-08	2.06433e-05	1.73285e-05	IQANK1/LPAR1/S100A10/TACSTD2/ARHGAP44/LIMCH1/VILL/MET/BAIAP2L1/VIL1/PPM1F/LRP1/SMAD4/RAC1/DLC1/ASAP3/WASH6P/ARHGEF5/TGFBR1/CORO1A/RAC2/PTGER4/SYNPO/HCLS1/RHOD/CFL2/NRP1/TMSB10/WASF2/TGFB3/SMAD3/CAPZB/SMIM22/PIK3R1/IQGAP2/ESAM/ABL1/COTL1/ARHGEF10L/TRIOBP/FCHSD2/DIXDC1/SWAP70/PROX1/FHOD3/WNT4/CCDC88A/SHANK3/JAM3/CDC42EP3/ARHGEF19/PDXP/SCIN/CGNL1/SPTB/MKKS/SLIT2/RHOC/FCHSD1/MTOR/RHOBTB3/TMOD2/BIN1/P…	112
	BP	GO:0048880	sensory system development	120/3670	394/18866	8.91961e-08	2.55678e-05	2.14623e-05	EPHB2/MITF/HIF1A/TTLL5/TGFB2/PTPRM/SHROOM2/FZD5/BMP4/ALDH1A2/MEIS2/TFAP2A/RXRA/C3/EPHA2/EFEMP1/FJX1/SMARCD3/TGFBR1/MEIS1/SLITRK6/PBX1/BDNF/CLIC4/FZD4/MYOM2/ZEB1/NRP1/ARID1A/SMAD3/FBN1/LRP5/SPRED1/BMPR1B/CYP1B1/LPCAT1/HIPK2/GATA3/PBX3/TOPORS/PPP1R13L/DLL1/TUB/NECTIN3/ZHX2/STRA6/TBC1D20/MYH10/TMEM231/PROX1/SERPINF1/B9D1/XRN2/CST3/RPGRIP1L/GDF11/CC2D2A/PROM1/ISL1/COL5A2/SPRY1/ACHE/SLC25A25/NINJ1/SKI…	120
	BP	GO:0031589	cell-substrate adhesion	111/3670	359/18866	1.14161e-07	3.17889e-05	2.66844e-05	EPHB3/SGCE/S100A10/TACSTD2/FBLN5/LIMCH1/MSLN/ADAM15/GAS6/ITGA3/PPM1F/LRP1/RAC1/THBS1/CIB1/DISC1/CSF1/CCN1/ITGB2/EMILIN1/DLC1/ITGB4/CCL28/ACTN1/LAMB3/CORO1A/SNED1/EPDR1/JUP/RSU1/RAC2/FZD4/FZD7/CCDC80/RHOD/FERMT3/NRP1/CDK6/LPXN/ITGB7/SMAD3/LAMB1/ITGB6/ONECUT2/FERMT2/PIK3R1/MEGF9/ANTXR1/COL1A1/ABL1/BCL6/TRIOBP/TMEM8B/NTN4/COL16A1/ATXN3/WNT4/JAM3/UNC13D/ATRN/ITGA5/SORBS1/PIK3CB/LYPD3/BCAM/UTRN/ITGA1/…	111
	BP	GO:0150063	visual system development	118/3670	388/18866	1.24252e-07	3.31431e-05	2.78212e-05	EPHB2/MITF/HIF1A/TTLL5/TGFB2/PTPRM/SHROOM2/FZD5/BMP4/ALDH1A2/MEIS2/TFAP2A/RXRA/C3/EPHA2/EFEMP1/FJX1/SMARCD3/TGFBR1/MEIS1/SLITRK6/PBX1/BDNF/CLIC4/FZD4/MYOM2/ZEB1/NRP1/ARID1A/SMAD3/FBN1/LRP5/SPRED1/BMPR1B/CYP1B1/LPCAT1/HIPK2/GATA3/PBX3/TOPORS/PPP1R13L/DLL1/TUB/NECTIN3/ZHX2/STRA6/TBC1D20/MYH10/TMEM231/PROX1/SERPINF1/B9D1/XRN2/CST3/RPGRIP1L/GDF11/CC2D2A/PROM1/COL5A2/SPRY1/ACHE/SLC25A25/NINJ1/SKI/MFN2…	118
	BP	GO:0001654	eye development	117/3670	384/18866	1.25825e-07	3.31431e-05	2.78212e-05	EPHB2/MITF/HIF1A/TTLL5/TGFB2/PTPRM/SHROOM2/FZD5/BMP4/ALDH1A2/MEIS2/TFAP2A/RXRA/EPHA2/EFEMP1/FJX1/SMARCD3/TGFBR1/MEIS1/SLITRK6/PBX1/BDNF/CLIC4/FZD4/MYOM2/ZEB1/NRP1/ARID1A/SMAD3/FBN1/LRP5/SPRED1/BMPR1B/CYP1B1/LPCAT1/HIPK2/GATA3/PBX3/TOPORS/PPP1R13L/DLL1/TUB/NECTIN3/ZHX2/STRA6/TBC1D20/MYH10/TMEM231/PROX1/SERPINF1/B9D1/XRN2/CST3/RPGRIP1L/GDF11/CC2D2A/PROM1/COL5A2/SPRY1/ACHE/SLC25A25/NINJ1/SKI/MFN2/SI…	117
	BP	GO:0031032	actomyosin structure organization	70/3670	200/18866	1.58351e-07	4.06129e-05	3.40916e-05	LPAR1/KRT19/S100A10/TACSTD2/LIMCH1/MET/MYH14/PPM1F/SMAD4/RAC1/FRMD6/KRT8/DLC1/ASAP3/MYH11/ARHGEF5/EPB41L4A/TGFBR1/CNN3/PTGER4/NEBL/CFL2/NRP1/WASF2/TGFB3/SMAD3/PIK3R1/ABL1/ARHGEF10L/KLHL41/KCTD13/MYH10/PROX1/FHOD3/WNT4/CCDC88A/ANLN/MYO18A/SORBS1/EPB41L4B/CGNL1/MKKS/RHOC/RTKN/MTOR/TMOD2/FAM171A1/PDLIM1/MEF2A/CCN2/TNNT2/EPHA1/EPB41/SH3PXD2B/TMOD1/TPM1/EPB41L2/FHOD1/FRMD5/FRMD3/CNN2/EVL/ARHGEF18/ALMS…	70
	BP	GO:0046580	negative regulation of Ras protein signal transduction	27/3670	52/18866	1.64357e-07	4.10724e-05	3.44773e-05	EPHB2/TGFB2/ARHGAP44/MET/ITGA3/RASAL1/HEG1/DLC1/MAPKAP1/DAB2IP/BCL6/KCTD13/TIMP2/RAPGEF1/SPRY1/MFN2/RASA4/SPRY2/RASA4B/FBP1/ARHGAP42/STMN3/CCDC125/SPRY3/ARHGAP35/SPRY4/ABL2	27
	BP	GO:0001933	negative regulation of protein phosphorylation	131/3670	444/18866	1.77245e-07	4.17373e-05	3.50354e-05	EPHB2/GPRC5A/NR2F2/PSCA/NDRG2/SFN/BMP4/ENG/PPM1F/CAMK2N1/SMAD4/TRIB2/CDK5RAP3/CIB1/PLPP3/EMILIN1/HEG1/EZR/TIMP3/PTPN13/PPARGC1A/DKK1/SEMA4D/PRNP/PRR5L/DMD/PRKAR2B/PTPRH/LYN/CYLD/SMAD7/SH2B3/SNCA/SIRT2/ZMYND11/VPS25/DUSP1/TLR4/TBC1D10C/CBLC/LRP5/SPRED1/HHEX/HYAL2/WNK2/ABL1/AKT1/DAB2IP/CDKN2C/ITPRIP/KAT2B/MLXIPL/PIBF1/RGS3/DBNDD2/GNAQ/PTK6/RASSF2/ADARB1/RAPGEF1/HEXIM2/AGT/GADD45B/TARBP2/CSK/INKA2/S…	131
	BP	GO:0003206	cardiac chamber morphogenesis	51/3670	131/18866	1.79664e-07	4.17373e-05	3.50354e-05	FZD1/CPE/HIF1A/TGFB2/BMP4/ENG/DSP/SMAD4/FGFR2/RXRA/TBX3/CCN1/HEG1/GATA4/SMARCD3/TGFBR1/FOXH1/MKS1/SMAD7/NRP1/ROBO1/DNAH11/GATA3/PPP1R13L/UBE4B/SAV1/PROX1/ID2/ADAMTS1/TGFBR3/ISL1/FZD2/ACVR1/SLIT2/EGLN1/TGFB1/TNNT2/NRP2/NOTCH1/TPM1/TNNI1/JAG1/RARB/CITED2/NOTCH2/BMPR2/PARVA/SMO/ZFPM1/FGFRL1/ADGRG6	51
	BP	GO:0051216	cartilage development	69/3670	197/18866	1.8752e-07	4.17373e-05	3.50354e-05	CHST11/HIF1A/BMP4/AXIN2/CTSK/CCN1/HMGA2/CSGALNACT1/EFEMP1/TGFBR1/FGF18/SLC39A14/OSR1/KAT2A/SMAD7/ZEB1/ANXA6/SMAD3/BMPR1B/HYAL2/COL1A1/POC1A/CHSY1/TRIP11/RFLNA/BBS2/SMAD1/RUNX1/GLG1/CREB3L2/SCIN/MKKS/CCN3/GLI2/GLI3/LTBP3/TGFB1/CCN2/WNT2B/FGFR1/EIF2AK3/MEX3C/PITX1/SNORC/PKDCC/PKD1/RUNX2/ITGB8/RARB/TGFBI/FGF9/MEF2D/TRPS1/SNAI1/BMPR2/LRP6/SOX6/EDN1/MUSTN1/HYAL3/FGFR3/WNT9A/ADAMTS7/TYMS/SATB2/SERPINH1…	69
	BP	GO:0007265	Ras protein signal transduction	107/3670	346/18866	1.90013e-07	4.17373e-05	3.50354e-05	EPHB2/LPAR1/TGFB2/ARHGAP44/AUTS2/MET/EPS8L3/ITGA3/RASGRP4/RAC1/PSD/KANK2/MRAS/RASAL1/ARHGEF28/CSF1/HEG1/DLC1/MAPRE2/VAV1/RAC2/ARHGEF3/GNA12/LYN/RHOD/MAPK11/FBXO8/NRP1/WASF2/LRRC59/GPR35/GARRE1/MAPKAP1/ROBO1/ZNF304/ABL1/EPS8L1/DAB2IP/BCL6/IQSEC1/RASGRP1/KCTD13/PRKD1/ADGRG1/CYTH4/RHOV/TIMP2/RAPGEF1/CDC42EP3/DOK3/EPS8L2/RAB33B/SPRY1/ITPKB/ARHGEF2/STARD13/RTKN/F2R/MFN2/PLK2/PHACTR4/RAP1A/RASA4/DNMT1/…	107
	BP	GO:0060411	cardiac septum morphogenesis	35/3670	77/18866	1.90663e-07	4.17373e-05	3.50354e-05	FZD1/TGFB2/BMP4/ENG/SMAD4/FGFR2/TBX3/CCN1/GATA4/TGFBR1/MKS1/SMAD7/NRP1/ROBO1/DNAH11/SAV1/PROX1/ID2/TGFBR3/ISL1/FZD2/ACVR1/SLIT2/EGLN1/NRP2/NOTCH1/JAG1/RARB/CITED2/NOTCH2/BMPR2/PARVA/SMO/ZFPM1/FGFRL1	35
	BP	GO:0045785	positive regulation of cell adhesion	127/3670	428/18866	1.92713e-07	4.17373e-05	3.50354e-05	PTPRU/S100A10/TGFB2/DOCK8/KIF26B/HLA-G/ZMIZ1/ITGA3/PPM1F/RAC1/PODXL/CIB1/DISC1/PLPP3/CSF1/CCN1/HLA-DMB/ITGB2/EMILIN1/PTAFR/TGM2/CD74/CCL28/VAV1/CORO1A/MYB/HSPD1/JUP/RSU1/FUT4/CD27/FUT3/CCDC80/LYN/XBP1/CYLD/RHOD/SMAD7/NRP1/CDK6/ERBB2/SMAD3/EGR3/PIK3R1/TNFSF4/GATA3/ABL1/AKT1/BCL6/IL18/SYK/TRIOBP/RASGRP1/IL23A/IL7/ADGRG1/COL16A1/IL6ST/CD81/KIFAP3/ZBTB7B/IL27RA/ZBTB1/CCDC88B/WNT4/MALT1/BCL10/UNC13D/N…	127
	BP	GO:0042326	negative regulation of phosphorylation	140/3670	484/18866	2.45173e-07	5.19447e-05	4.36037e-05	EPHB2/GPRC5A/NR2F2/PSCA/NDRG2/SFN/BMP4/ENG/PPM1F/CAMK2N1/SMAD4/TRIB2/CDK5RAP3/CIB1/PLPP3/EMILIN1/HEG1/EZR/TIMP3/PTPN13/PPARGC1A/DKK1/SEMA4D/PRNP/PRR5L/DMD/PRKAR2B/PTPRH/LYN/CYLD/SMAD7/SH2B3/SNCA/SIRT2/ZMYND11/VPS25/DUSP1/TLR4/TBC1D10C/CBLC/LRP5/SPRED1/HHEX/HYAL2/WNK2/ABL1/AKT1/DAB2IP/CDKN2C/ITPRIP/KAT2B/MLXIPL/PIBF1/RGS3/DBNDD2/GNAQ/PTK6/RASSF2/ADARB1/RAPGEF1/HEXIM2/AGT/PRDX3/GADD45B/TARBP2/CSK/I…	140
	BP	GO:1902107	positive regulation of leukocyte differentiation	58/3670	159/18866	3.70187e-07	7.67626e-05	6.44366e-05	GAS6/HLA-G/ZMIZ1/CSF1/CD74/TMEM64/ZBTB46/MYB/CD27/HLA-DRB1/HCLS1/CA2/XBP1/CYLD/EGR3/TNFSF4/GATA3/BCL6/IL18/SYK/RASGRP1/IL23A/CD101/IL7/ID2/ZBTB7B/ZBTB1/FLT3LG/MALT1/NFKBID/RUNX1/ITPKB/NFKBIZ/GLI2/SHH/GLI3/VSIR/TGFB1/BTN2A2/CTNNBIP1/INPP5D/TESC/LIF/NOTCH2/DUSP10/TNFSF9/ATP11C/MMP14/AXL/RB1/PPARGC1B/JUN/PCK1/KLF10/CD83/FOXP3/MDK/ADAM8	58
	BP	GO:1902105	regulation of leukocyte differentiation	92/3670	290/18866	3.84258e-07	7.80204e-05	6.54924e-05	MITF/SLAMF8/TMEM131L/BMP4/GAS6/HLA-G/ZMIZ1/DTX1/CSF1/CD74/TMEM64/ZBTB46/MYB/CD27/HLA-DRB1/HCLS1/CA2/LYN/XBP1/KAT2A/CYLD/SMAD7/ZEB1/CDK6/ERBB2/TLR3/TLR4/FBN1/EGR3/PIK3R1/TNFSF4/GATA3/ABL1/BCL6/IL18/SYK/RASGRP1/IL23A/CD101/IL7/ID2/TOB2/ZBTB7B/ZBTB1/RASSF2/FLT3LG/CAMK4/NME2/MALT1/NFKBID/RUNX1/ITPKB/NFKBIZ/NRARP/NME1/GLI2/INHA/ZC3H12A/MTOR/SHH/GLI3/VSIR/TGFB1/BTN2A2/PRDM1/IRF7/CTNNBIP1/INPP5D/TESC/LI…	92
	BP	GO:0052696	flavonoid glucuronidation	9/3670	9/18866	3.95769e-07	7.87176e-05	6.60777e-05	UGT1A8/UGT1A9/UGT1A3/UGT1A7/UGT1A5/UGT1A4/UGT1A10/UGT1A1/UGT1A6	9
	BP	GO:0007015	actin filament organization	127/3670	434/18866	4.44534e-07	8.66485e-05	7.27351e-05	IQANK1/LPAR1/S100A10/TACSTD2/LIMCH1/VILL/MET/BAIAP2L1/SHROOM2/VIL1/PPM1F/RAC1/EZR/DLC1/ASAP3/WASH6P/ACTN1/ARHGEF5/TGFBR1/CORO1A/LCP1/RAC2/PTGER4/NEBL/SYNPO/GAS7/HCLS1/RHOD/MYO5A/CFL2/NRP1/COBL/TMSB10/WASF2/TGFB3/SMAD3/CAPZB/WIPF1/PIK3R1/IQGAP2/ESAM/ABL1/COTL1/ARHGEF10L/MCU/TRIOBP/FCHSD2/MYO6/SPATC1L/KCTD13/SWAP70/PROX1/FHOD3/WNT4/RFLNA/CCDC88A/SHANK3/MYO1A/CDC42EP3/ESPN/SORBS1/PDXP/SCIN/CGNL1/ARH…	127
	BP	GO:0048568	embryonic organ development	131/3670	451/18866	4.61097e-07	8.81148e-05	7.39659e-05	EPHB2/NR2F2/CDX2/CHST11/KRT19/HS6ST1/HIF1A/TGFB2/PDGFC/SOBP/PTCH1/TSHZ1/FZD5/BMP4/ALDH1A2/ENG/FGFR2/VASH1/TFAP2A/KRT8/TBX3/CCN1/EPHA2/EFEMP1/LRIG1/PLCD3/GATA4/TGFBR1/JUNB/SLITRK6/PBX1/SPINT2/NDST1/FOXH1/OSR1/MKS1/SH2B3/ZEB1/COBL/ADM/TGFB3/ARID1A/SUFU/SMAD3/LRIG3/FBN1/PKD2/CXCL8/HIPK2/GATA3/PBX3/AKT1/PPP1R13L/DLL1/TRIOBP/STRA6/MYO6/PROX1/ID2/FLT3LG/SPINT1/CC2D2A/TTC39C/RNF207/BBS5/FZD2/IFT52/ACVR1…	131
	BP	GO:0072073	kidney epithelium development	53/3670	142/18866	5.06578e-07	9.44054e-05	7.92464e-05	PGF/EPCAM/TACSTD2/KIF26B/PTCH1/BMP4/CAT/SMAD4/FGFR2/PODXL/KANK2/GREB1L/PBX1/BDNF/OSR1/KLF15/EPHA4/SMAD7/WNK4/FAT4/MTSS1/SMAD3/PKD2/GATA3/DLL1/WNT4/GDF11/SMAD1/AGT/PROM1/LGR4/SPRY1/SLIT2/PAX8/DCHS1/GZF1/SHH/GLI3/NOTCH1/WNT2B/FGFR1/MYO1E/CTNNBIP1/NPNT/BASP1/LIF/PKD1/JAG1/VEGFA/RARB/NOTCH2/SMO/FGF2	53
	BP	GO:0043010	camera-type eye development	102/3670	332/18866	5.13389e-07	9.44054e-05	7.92464e-05	EPHB2/MITF/HIF1A/TTLL5/TGFB2/PTPRM/SHROOM2/FZD5/BMP4/ALDH1A2/TFAP2A/RXRA/EPHA2/EFEMP1/FJX1/SMARCD3/TGFBR1/MEIS1/SLITRK6/CLIC4/FZD4/MYOM2/ZEB1/NRP1/ARID1A/SMAD3/FBN1/LRP5/SPRED1/BMPR1B/CYP1B1/LPCAT1/HIPK2/GATA3/TOPORS/PPP1R13L/DLL1/TUB/NECTIN3/ZHX2/STRA6/TBC1D20/MYH10/TMEM231/PROX1/SERPINF1/B9D1/XRN2/RPGRIP1L/GDF11/CC2D2A/PROM1/SPRY1/ACHE/SLC25A25/NINJ1/SKI/MFN2/SIX5/RAB11FIP4/PHACTR4/SHH/GLI3/SPR…	102
	BP	GO:1902903	regulation of supramolecular fiber organization	112/3670	373/18866	5.23872e-07	9.45491e-05	7.93671e-05	IQANK1/LPAR1/S100A10/TACSTD2/LIMCH1/VILL/MET/BAIAP2L1/VIL1/PPM1F/SMAD4/RAC1/CIB1/EMILIN1/DLC1/ASAP3/WASH6P/ARHGEF5/TGFBR1/MAP1A/CORO1A/PTGER4/SYNPO/HCLS1/SNCA/CFL2/NRP1/TMSB10/WASF2/TGFB3/SMAD3/CAPZB/PIK3R1/MID1/FKBP4/IQGAP2/ESAM/ABL1/COTL1/ARHGEF10L/TRIOBP/FCHSD2/SWAP70/PROX1/APP/MID1IP1/FHOD3/TPX2/WNT4/CCDC88A/SHANK3/CDC42EP3/HDGFL3/PDXP/SCIN/CGNL1/ARHGEF2/SPTB/MECP2/MKKS/SLIT2/RHOC/NIN/FCHSD1/…	112
	BP	GO:0032231	regulation of actin filament bundle assembly	42/3670	104/18866	6.70935e-07	0.00011889	9.97992e-05	LPAR1/S100A10/TACSTD2/LIMCH1/MET/VIL1/PPM1F/RAC1/DLC1/ASAP3/ARHGEF5/TGFBR1/PTGER4/SYNPO/NRP1/WASF2/TGFB3/SMAD3/PIK3R1/ABL1/ARHGEF10L/SWAP70/WNT4/CCDC88A/SHANK3/CGNL1/MKKS/RHOC/MTOR/CCN2/EPHA1/SH3PXD2B/FLNA/TPM1/FHOD1/EVL/ARHGEF18/ALMS1/ID1/SERPINF2/RDX/ROCK1	42
	BP	GO:1903829	positive regulation of cellular protein localization	103/3670	338/18866	6.93229e-07	0.000120647	0.000101274	EPHB2/SFN/ABHD17C/FZD5/VIL1/GAS6/PRKCH/ITGA3/LRP1/CDK5RAP3/CIB1/ITGB2/EZR/EPHA2/STAC/ABHD17B/PRNP/PRR5L/MAP1A/CCT6A/JUP/RAC2/HCLS1/ABLIM3/CYLD/AP2B1/CNPY4/ERBB2/SREBF2/SMAD3/YWHAZ/PRKACA/PIK3R1/HYAL2/AKT1/LGALS3/TRIM8/CD81/ZPR1/MSN/CCDC88A/CACNB3/PPP1R13B/SORBS1/RAB11FIP2/EDEM1/DKC1/SEC16A/PINX1/TCF7L2/NPTN/NPEPPS/ZC3H12A/E2F1/STX4/SHH/GLI3/PPM1A/TGFB1/BCAP31/SSH1/BBC3/VAMP2/EGFR/EPB41/EIF2AK3/FL…	103
	BP	GO:0051090	regulation of DNA-binding transcription factor activity	131/3670	455/18866	7.80533e-07	0.000133457	0.000112028	FZD1/PTCH1/GAS6/PRKCH/CAT/LRP8/DAP/IRAK2/TRIM31/PPARG/CDK5RAP3/CIB1/PLPP3/ITGB2/PPARGC1A/IL18R1/SRI/ARHGEF5/PRNP/SGK1/FOXH1/RIPK4/JUP/CRTC1/ROR1/TLR2/FZD4/HCLS1/CYLD/SMAD7/MAPK11/STING1/SUFU/CEBPG/SMAD3/TLR3/ANXA4/TLR4/DDIT3/WWP2/PLA2G10/LRP5/NLRC5/CYP1B1/PKD2/HIPK2/TNFSF4/TLR6/AKT1/DAB2IP/IL18/SYK/NFKB1/TRAF3/SAV1/PRKD1/NLRC3/CRTC3/PROX1/TRIM8/ID2/APP/MALT1/BCL10/TRIM32/ARID5B/NFKBID/TRIM62/AGT/…	131
	BP	GO:0045444	fat cell differentiation	77/3670	235/18866	8.24518e-07	0.000135655	0.000113872	FABP3/PRDM16/ERO1A/ADRB2/RORC/TRIB2/PPARG/STEAP4/HMGA2/PPARGC1A/TMEM64/LAMB3/RORA/ZFP36/ZBTB7C/ZNF385A/FTO/XBP1/AACS/CCDC71L/LRP3/SIRT2/ATAT1/EGR2/SMAD3/DDIT3/JDP2/LRP5/ALDH6A1/PEX11A/GATA3/AKT1/ZADH2/NR1D1/SAV1/FAM120B/ARNTL/ID2/ZBTB7B/BBS2/TRIM32/ARID5B/PSMB8/GRK5/MKKS/TCF7L2/ZC3H12A/MTOR/E2F1/TGFB1/NUDT7/NR4A1/MEX3C/SH3PXD2B/CEBPD/RNASEL/OSBPL11/ZNF516/INSIG1/LRRC8C/JAG1/MMP11/CLIP3/DUSP10/CEB…	77
	BP	GO:1903708	positive regulation of hemopoiesis	69/3670	204/18866	8.28055e-07	0.000135655	0.000113872	HIF1A/GAS6/HLA-G/ZMIZ1/CSF1/CD74/TMEM64/ZBTB46/MYB/CD27/HLA-DRB1/HCLS1/CA2/XBP1/CYLD/EGR3/TNFSF4/GATA3/BCL6/IL18/SYK/RASGRP1/IL23A/CD101/IL7/ID2/ZBTB7B/ZBTB1/FLT3LG/MALT1/NFKBID/RUNX1/ITPKB/SCIN/NFKBIZ/FAXDC2/GLI2/SHH/GLI3/VSIR/TGFB1/ISG15/BTN2A2/ARNT/BRD1/CTNNBIP1/INPP5D/TESC/LIF/JAG1/NUDT21/ATXN1L/NOTCH2/DUSP10/TNFSF9/ATP11C/MMP14/AXL/RB1/MTURN/PPARGC1B/JUN/PCK1/ETS1/KLF10/CD83/FOXP3/MDK/ADAM8	69
	BP	GO:0048754	branching morphogenesis of an epithelial tube	56/3670	155/18866	8.35141e-07	0.000135655	0.000113872	PGF/ETV5/TACSTD2/PTCH1/MET/BMP4/ENG/SMAD4/FGFR2/TBX3/CSF1/EPHA2/GREB1L/PBX1/CLIC4/MKS1/NRP1/FAT4/VDR/LRP5/PKD2/ABL1/PLXND1/CTSH/WNT4/AGT/ESRP2/LGR4/SPRY1/NRARP/ACVR1/NOTCH4/SLIT2/GLI2/PAX8/DCHS1/GZF1/SHH/GLI3/SPRY2/NOTCH1/WNT2B/CTNNBIP1/NPNT/PKD1/SEMA3E/VEGFA/NKX3-1/MMP14/LRP6/COL4A1/SMO/EDN1/TNC/MDK/FGF2	56
	BP	GO:0051047	positive regulation of secretion	103/3670	340/18866	9.40386e-07	0.000150246	0.000126121	CADPS2/HIF1A/TGFB2/SCAMP5/LRP1/SMAD4/RAC1/MYRIP/ITGB2/PTAFR/EZR/GOLPH3/P2RY1/ADORA1/SRI/BAIAP3/CD14/OXTR/MYB/OXCT1/PTGER4/TLR2/HLA-DRB1/XBP1/SNCA/AACS/TGFB3/SYT1/NTSR1/TLR4/AQP1/SNF8/PLA2G10/RAB3A/TNFSF4/UNC13B/GNAI2/SYK/MCU/RAB2B/GLUL/RAB8B/SDCBP/MYH10/FRMD4A/VAMP8/CACNA1G/UNC13D/AGT/MYO18A/ATP13A2/ISL1/HGS/SCIN/ACHE/PPIA/NCS1/GAPDH/STXBP1/SLC12A2/TCF7L2/ACSL4/INHA/GIPR/STX4/RAB27B/ADORA2A/HLA-E…	103
	BP	GO:1904375	regulation of protein localization to cell periphery	47/3670	123/18866	1.00847e-06	0.000158525	0.00013307	EPHB2/ARHGAP44/MISP/VIL1/PRKCH/ITGA3/LRP1/CIB1/EZR/EPHA2/STAC/PRNP/LDLRAP1/GPC4/CNPY4/PIK3R1/AKT1/TMBIM1/LGALS3/BCL2L1/VAMP8/NUMB/ZDHHC7/SORBS1/CSK/RAB11FIP2/DAB2/STX4/RAP1A/TGFB1/EGFR/EPB41/LYPD1/EPB41L2/PKDCC/CLIP3/SPTBN1/MMP14/ATP2B4/NKD2/GBP1/GNAI1/PLK1/AGR2/RSC1A1/PRKCE/ABCA2	47
	BP	GO:1904951	positive regulation of establishment of protein localization	110/3670	370/18866	1.1225e-06	0.000173649	0.000145766	HIF1A/TGFB2/SCAMP5/SFN/FZD5/GAS6/LRP1/RAC1/MYRIP/CIB1/ITGB2/EZR/GOLPH3/SRI/BAIAP3/CD14/ARHGEF5/PRNP/PRR5L/OXCT1/CCT6A/JUP/RAC2/PTGER4/TLR2/HLA-DRB1/HCLS1/XBP1/ABLIM3/AACS/TGFB3/ERBB2/SREBF2/SMAD3/YWHAZ/PRKACA/TLR4/PIK3R1/HYAL2/TNFSF4/UNC13B/SYK/MCU/GLUL/MYH10/CD81/FRMD4A/ZPR1/MYO18A/ATP13A2/CACNB3/PPP1R13B/ISL1/ACHE/PPIA/EDEM1/DKC1/SEC16A/GAPDH/TCF7L2/ACSL4/NPEPPS/ZC3H12A/E2F1/GIPR/STX4/ADORA2A/S…	110
	BP	GO:1903532	positive regulation of secretion by cell	96/3670	313/18866	1.19222e-06	0.000175801	0.000147572	CADPS2/HIF1A/TGFB2/SCAMP5/LRP1/SMAD4/RAC1/MYRIP/ITGB2/PTAFR/EZR/GOLPH3/P2RY1/SRI/BAIAP3/CD14/OXTR/MYB/OXCT1/PTGER4/TLR2/HLA-DRB1/XBP1/SNCA/AACS/TGFB3/SYT1/NTSR1/TLR4/SNF8/PLA2G10/RAB3A/TNFSF4/UNC13B/SYK/MCU/RAB2B/GLUL/RAB8B/SDCBP/MYH10/FRMD4A/VAMP8/CACNA1G/UNC13D/AGT/MYO18A/ATP13A2/ISL1/HGS/ACHE/PPIA/NCS1/GAPDH/STXBP1/SLC12A2/TCF7L2/ACSL4/INHA/GIPR/STX4/RAB27B/ADORA2A/HLA-E/TGFB1/GRK2/ABAT/SNX4/N…	96
	BP	GO:0051222	positive regulation of protein transport	106/3670	354/18866	1.20802e-06	0.000175801	0.000147572	HIF1A/TGFB2/SCAMP5/SFN/FZD5/GAS6/LRP1/RAC1/MYRIP/CIB1/ITGB2/EZR/GOLPH3/SRI/BAIAP3/CD14/ARHGEF5/PRNP/PRR5L/OXCT1/JUP/RAC2/PTGER4/TLR2/HLA-DRB1/HCLS1/XBP1/ABLIM3/AACS/TGFB3/ERBB2/SREBF2/SMAD3/YWHAZ/PRKACA/TLR4/PIK3R1/HYAL2/TNFSF4/UNC13B/SYK/MCU/GLUL/MYH10/CD81/FRMD4A/ZPR1/MYO18A/ATP13A2/CACNB3/PPP1R13B/ISL1/ACHE/PPIA/EDEM1/SEC16A/GAPDH/TCF7L2/ACSL4/NPEPPS/ZC3H12A/E2F1/GIPR/STX4/ADORA2A/SHH/GLI3/HLA…	106
	BP	GO:0072163	mesonephric epithelium development	40/3670	99/18866	1.20856e-06	0.000175801	0.000147572	PGF/EPCAM/TACSTD2/KIF26B/PTCH1/BMP4/CAT/SMAD4/FGFR2/GREB1L/PBX1/BDNF/OSR1/SMAD7/FAT4/SMAD3/PKD2/GATA3/WNT4/GDF11/SMAD1/AGT/LGR4/SPRY1/SLIT2/PAX8/DCHS1/GZF1/SHH/GLI3/WNT2B/FGFR1/CTNNBIP1/NPNT/BASP1/PKD1/VEGFA/RARB/SMO/FGF2	40
	BP	GO:0072164	mesonephric tubule development	40/3670	99/18866	1.20856e-06	0.000175801	0.000147572	PGF/EPCAM/TACSTD2/KIF26B/PTCH1/BMP4/CAT/SMAD4/FGFR2/GREB1L/PBX1/BDNF/OSR1/SMAD7/FAT4/SMAD3/PKD2/GATA3/WNT4/GDF11/SMAD1/AGT/LGR4/SPRY1/SLIT2/PAX8/DCHS1/GZF1/SHH/GLI3/WNT2B/FGFR1/CTNNBIP1/NPNT/BASP1/PKD1/VEGFA/RARB/SMO/FGF2	40
	BP	GO:0009101	glycoprotein biosynthetic process	103/3670	342/18866	1.26922e-06	0.00018191	0.0001527	CHST11/SOAT1/HS6ST1/FUT6/GCNT1/CHST15/ST3GAL5/ST8SIA4/B3GNT3/POGLUT3/ST3GAL1/MUC6/MAN1C1/MAN1A1/MUC5B/B3GNT9/GALNT10/ST3GAL4/ST6GALNAC6/GOLPH3/BACE2/SLC39A8/NPC1/CSGALNACT1/ABO/ST6GAL1/GALNT11/HS3ST3B1/GALNT18/GALNT2/NDST1/DSE/UST/EXTL3/CSGALNACT2/FUT4/VCAN/FUT3/CHST10/ST3GAL3/MGAT2/UBE2J1/BMPR1B/DHDDS/GCNT4/DERL3/EXT1/ST6GALNAC2/CHSY1/TRIP11/ST6GALNAC1/ALG8/GALNT4/TRAK1/CHST14/MGAT5/B4GALT6/SLC3…	103
	BP	GO:0010976	positive regulation of neuron projection development	90/3670	290/18866	1.46564e-06	0.000207016	0.000173775	FZD1/LPAR1/VLDLR/SYT17/PLXNC1/ITGA3/LRP8/LRP1/CAPRIN2/ENC1/RASAL1/DISC1/NEGR1/ARSB/RETREG3/SEMA4D/BDNF/CRTC1/ROR1/FZD4/EPHA4/SCN1B/LYN/WNT3/NRP1/COBL/TIAM2/DDX56/SYT1/ROBO1/DLG4/P3H1/DAB2IP/PLXND1/CNTN1/PLXNB1/PRKD1/SERPINF1/PTK6/SCARF1/SHANK3/NME2/RAPGEF1/TRAK1/AGT/MARK2/ZFYVE27/CREB3L2/SLIT2/NME1/NIN/STYXL1/NPTN/MEGF8/FKBP1B/MTOR/ANAPC2/RAP1A/C21orf91/FGFR1/CXCR4/NTRK2/TENM3/FYN/KATNB1/ITSN1/UN…	90
	BP	GO:0006066	alcohol metabolic process	113/3670	385/18866	1.60568e-06	0.000223556	0.000187659	APOL2/APOL1/SOAT1/VLDLR/ALDH1A1/H6PD/ALDH1A2/CAT/SDR16C5/RXRA/PLPP3/PTAFR/P2RY1/NPC1/CYB5R3/RETSAT/PLCD3/SPTLC3/PLCB4/CUBN/NPC2/RDH11/LDLRAP1/AKR1C4/PLA2G4A/IDH2/SNCA/MBTPS1/ALDH3B1/VDR/SULT1A2/SREBF2/NTSR1/GCH1/LRP5/CYP1B1/PCBD1/DHDDS/SPR/NFKB1/AKR1B10/DGAT1/GDPD3/APP/IP6K2/ERLIN2/WNT4/SCARF1/FMO5/GK/ACAA2/ALDH1B1/TPI1/PDXP/INPP5A/ITPKB/MECP2/SMPD1/SPTLC2/CHKA/STARD3/AKR7A2/OSBPL5/MYOF/SULT1A1/I…	113
	BP	GO:0042063	gliogenesis	94/3670	307/18866	1.66304e-06	0.000227519	0.000190986	EIF2B2/MATN2/ETV5/LPAR1/TGFB2/PRKCH/ZMIZ1/LRP1/DTX1/PPARG/DISC1/CSF1/BACE2/P2RY1/TNFRSF21/GPC1/MYB/KLF15/ROR1/GPR157/TLR2/EPHA4/IDH2/LYN/LAMA2/CDK6/SIRT2/EGR2/SUN2/ERBB2/LAMB1/TLR4/FA2H/ABL1/AKT1/DAB2IP/CDKN2C/MXRA8/DLL1/EEF2/NR1D1/NSUN5/ADGRG1/IL6ST/ID2/APP/SUN1/CD9/SPINT1/B4GALT6/ERBB3/CSK/TNFRSF1B/SKI/MTOR/E2F1/SYNE2/ADORA2A/BIN1/SHH/GLI3/TGFB1/B4GALT5/NOTCH1/EGFR/CXCR4/CSPG4/NTRK2/PLAG1/SERPI…	94
	BP	GO:0001649	osteoblast differentiation	75/3670	231/18866	1.68083e-06	0.000227519	0.000190986	FZD1/COL6A1/WWOX/PTCH1/BMP4/SIRT7/CAT/FGFR2/FAM20C/AXIN2/CCN1/EPHA2/TMEM64/SEMA4D/JUNB/H3-3B/VCAN/CLIC1/WNT3/IL6R/LRP3/CDK6/SUFU/SMAD3/PRKACA/LRP5/BMPR1B/COL1A1/AKT1/RRBP1/ZHX3/PRKD1/IL6ST/ID2/RASSF2/H3-3A/WNT4/TOB1/HSD17B4/SMAD1/LGR4/HSPE1/ACHE/LIMD1/ACVR1/ASF1A/HIRA/GLI2/SKI/PHB/SHH/GLI3/NOTCH1/HDAC4/FBXO5/SH3PXD2B/CEBPD/SMOC1/CTNNBIP1/NPNT/REST/JAG1/TWSG1/RUNX2/FGF9/MEF2D/CEBPB/SNAI1/BMPR2/SMO…	75
	BP	GO:0048593	camera-type eye morphogenesis	47/3670	125/18866	1.72005e-06	0.000229638	0.000192765	EPHB2/HIF1A/PTPRM/SHROOM2/FZD5/BMP4/TFAP2A/EPHA2/FJX1/MEIS1/ZEB1/ARID1A/LRP5/HIPK2/TOPORS/DLL1/NECTIN3/ZHX2/STRA6/TBC1D20/PROX1/RPGRIP1L/GDF11/PROM1/SKI/MFN2/PHACTR4/GLI3/WNT2B/NTRK2/TENM3/JAG1/VEGFA/ALDH1A3/PAX6/NOTCH2/THRB/NRL/LRP6/ROM1/FAT1/MAN2A1/C12orf57/ARL6/HIPK1/RPGRIP1/WNT9A	47
	BP	GO:0007431	salivary gland development	21/3670	39/18866	1.7909e-06	0.000235866	0.000197992	TGFB2/FGFR2/TGM2/XBP1/NRP1/TGFB3/PLXND1/NTN4/CST3/ESRP2/BTBD7/SEMA3A/SHH/TGFB1/EGFR/FGFR1/TWSG1/PAX6/NKX3-1/TFCP2L1/CLCN2	21
	BP	GO:0003170	heart valve development	28/3670	61/18866	2.46173e-06	0.000311346	0.000261352	TGFB2/BMP4/SMAD4/CCN1/EMILIN1/GATA4/ROBO1/GATA3/STRA6/TNFRSF1B/ACVR1/SLIT2/MTOR/DCHS1/TGFB1/NOTCH1/PRDM1/JAG1/ADAMTS9/EFNA1/HECTD1/NOTCH2/SNAI1/BMPR2/RB1/ZFPM1/FGFRL1/ROCK1	28
	BP	GO:0048608	reproductive structure development	126/3670	443/18866	2.49604e-06	0.000311346	0.000261352	EIF2B2/NR2F2/CDX2/KRT19/HS6ST1/HIF1A/TGFB2/HTRA1/GJB3/PTCH1/ADAM15/FZD5/BMP4/SMAD4/FGFR2/PPARG/VASH1/RXRA/KRT8/TBX3/CCN1/GREB1L/PLCD3/GATA4/TGFBR1/JUNB/H3-3B/SPINT2/OSR1/MAMLD1/FZD4/ADM/VDR/ARID1A/TLR3/FKBP4/BMPR1B/PKD2/GATA3/AKT1/STRA6/TBC1D20/BCL2L2/BCL2L1/ADGRG1/SERPINF1/CST3/H3-3A/HSD17B2/WNT4/ADAMTS1/HSD17B4/SPINT1/ARID5B/SGPL1/PRDX3/LGR4/MAP3K4/TFEB/PSAP/MKKS/STC2/SLIT2/EGLN1/GLI2/INHA/RHOB…	126
	BP	GO:0008360	regulation of cell shape	55/3670	156/18866	2.4987e-06	0.000311346	0.000261352	FGD3/LPAR1/MYH14/VIL1/PLXNC1/RAC1/ITGB2/EZR/DLC1/P2RY1/SEMA4D/CORO1A/SEMA4A/RAC2/GNA12/RHOD/PALM2AKAP2/FERMT2/PLXND1/FGD2/PLXNB1/FGD6/MYH10/MSN/CDC42EP3/MARK2/LIMD1/RHOC/RHOBTB3/FAM171A1/EPB41/ALDOA/TPM1/FYN/FMNL1/SEMA3E/VEGFA/PLEKHO1/EPS8/RHOBTB1/RHOF/ICAM1/PARVA/ARHGEF18/ARHGAP35/RHOB/FGD4/GAS2/WASF3/PLXNB3/FMNL3/WDPCP/COCH/RDX/PLXNA3	55
	BP	GO:0048592	eye morphogenesis	55/3670	156/18866	2.4987e-06	0.000311346	0.000261352	EPHB2/HIF1A/PTPRM/SHROOM2/FZD5/BMP4/TFAP2A/EPHA2/EFEMP1/FJX1/MEIS1/BDNF/ZEB1/ARID1A/FBN1/LRP5/HIPK2/TOPORS/DLL1/NECTIN3/ZHX2/STRA6/TBC1D20/PROX1/RPGRIP1L/GDF11/PROM1/COL5A2/SKI/MFN2/PHACTR4/GLI3/WNT2B/NTRK2/TENM3/PRDM1/FSCN2/JAG1/VEGFA/RARB/ALDH1A3/PAX6/NOTCH2/THRB/MYO7A/NRL/LRP6/ROM1/FAT1/MAN2A1/C12orf57/ARL6/HIPK1/RPGRIP1/WNT9A	55
	BP	GO:0045621	positive regulation of lymphocyte differentiation	41/3670	105/18866	2.54084e-06	0.000311346	0.000261352	GAS6/HLA-G/ZMIZ1/CD74/MYB/CD27/XBP1/CYLD/EGR3/TNFSF4/GATA3/BCL6/IL18/SYK/RASGRP1/IL23A/IL7/ZBTB7B/ZBTB1/FLT3LG/MALT1/NFKBID/RUNX1/ITPKB/NFKBIZ/GLI2/SHH/GLI3/VSIR/BTN2A2/INPP5D/DUSP10/TNFSF9/ATP11C/MMP14/AXL/PCK1/CD83/FOXP3/MDK/ADAM8	41
	BP	GO:0001657	ureteric bud development	39/3670	98/18866	2.55569e-06	0.000311346	0.000261352	PGF/EPCAM/TACSTD2/KIF26B/PTCH1/BMP4/CAT/SMAD4/FGFR2/GREB1L/PBX1/BDNF/OSR1/SMAD7/FAT4/SMAD3/PKD2/GATA3/WNT4/GDF11/SMAD1/AGT/LGR4/SPRY1/SLIT2/PAX8/DCHS1/GZF1/SHH/GLI3/WNT2B/FGFR1/CTNNBIP1/NPNT/BASP1/VEGFA/RARB/SMO/FGF2	39
	BP	GO:0022604	regulation of cell morphogenesis	139/3670	499/18866	2.67318e-06	0.00032164	0.000269993	EPHB2/SEMA4B/EPHB3/FGD3/LPAR1/CLDN4/S100A10/TACSTD2/SYT17/ARHGAP44/PTPRS/MYH14/VIL1/PLXNC1/LRP8/LRP1/RAC1/CAPRIN2/RASAL1/CIB1/DISC1/ITGB2/EZR/DLC1/P2RY1/SIPA1L1/MYCBP2/SEMA4D/DNM3/CORO1A/SEMA4A/BDNF/RAC2/UST/FZD4/XK/GNA12/EPHA4/WNT3/RHOD/SEMA3F/NRP1/PALM2AKAP2/NRCAM/TIAM2/SYT1/CAPZB/ROBO1/DLG4/FERMT2/SEMA4G/ABL1/PLXND1/SARM1/TRIOBP/FGD2/PLXNB1/FGD6/MYH10/BCL11A/MSN/SHANK3/TRAK1/CDC42EP3/UNC13D/IF…	139
	BP	GO:0003179	heart valve morphogenesis	25/3670	52/18866	2.97424e-06	0.0003535	0.000296737	TGFB2/BMP4/SMAD4/CCN1/EMILIN1/GATA4/ROBO1/GATA3/STRA6/ACVR1/SLIT2/MTOR/DCHS1/TGFB1/NOTCH1/JAG1/ADAMTS9/EFNA1/NOTCH2/SNAI1/BMPR2/RB1/ZFPM1/FGFRL1/ROCK1	25
	BP	GO:0001676	long-chain fatty acid metabolic process	43/3670	113/18866	3.24753e-06	0.000376791	0.000316288	CYP2S1/ACSL1/PTGS1/ACSL5/FAAH2/SLC27A1/PLA2G4A/LTC4S/MYO5A/EPHX1/FADS2/SLC27A2/PLA2G10/FADS1/GPX4/CYP1B1/ACOX1/QKI/HSD17B4/SCP2/GSTA1/DAGLA/ACSL4/CYP2D7/DAGLB/ACOT2/ACOT8/ELOVL5/CYP2U1/CYP2E1/PTGES3/PTGES/GSTM4/ACOT1/TBXAS1/PNPLA3/PAM/FAAH/ABCD1/CYP4F12/CYP4F11/PLA2G4C/LIPE	43
	BP	GO:0032963	collagen metabolic process	43/3670	113/18866	3.24753e-06	0.000376791	0.000316288	MMP1/HIF1A/ADAM15/BMP4/TNS2/MMP15/ENG/PPARG/CTSK/EMILIN1/KLK6/MFAP4/MYB/TGFB3/PEPD/TNXB/COL1A1/P3H1/CIITA/CTSS/P3H3/CTSL/CST3/WNT4/ERRFI1/F2R/TRAM2/RAP1A/VSIR/TGFB1/CCN2/P3H2/MMP11/MMP14/CTSD/LARP6/ID1/TMPRSS6/SERPINF2/MMP17/MMP25/VIM/SERPINH1	43
	BP	GO:0032233	positive regulation of actin filament bundle assembly	28/3670	62/18866	3.65942e-06	0.000419584	0.00035221	LPAR1/S100A10/LIMCH1/VIL1/PPM1F/RAC1/ARHGEF5/TGFBR1/SYNPO/NRP1/TGFB3/SMAD3/ABL1/ARHGEF10L/SWAP70/WNT4/CCDC88A/RHOC/MTOR/CCN2/EPHA1/SH3PXD2B/FLNA/TPM1/FHOD1/EVL/ID1/SERPINF2	28
	BP	GO:1903706	regulation of hemopoiesis	138/3670	498/18866	3.91497e-06	0.000440251	0.000369558	MITF/HIF1A/SLAMF8/TMEM131L/BMP4/GAS6/HLA-G/ZMIZ1/MEIS2/DTX1/THBS1/CIB1/CSF1/CD74/TMEM64/ZFP36/ZBTB46/MEIS1/MYB/H3-3B/CD27/HLA-DRB1/HCLS1/CA2/LYN/XBP1/KAT2A/CYLD/SMAD7/ZEB1/KLF13/CDK6/ERBB2/TLR3/TLR4/FBN1/EGR3/PIK3R1/LMO2/TNFSF4/GATA3/ABL1/PSMC5/PSMC4/PSMD3/BCL6/IL18/SYK/KAT2B/DLL1/LGALS3/RASGRP1/IL23A/CD101/IL7/ID2/TOB2/ZBTB7B/ZBTB1/RASSF2/H3-3A/PRMT6/FLT3LG/CAMK4/PSMD13/NME2/MALT1/TCF12/NFKBID/R…	138
	BP	GO:0001823	mesonephros development	40/3670	103/18866	3.93001e-06	0.000440251	0.000369558	PGF/EPCAM/TACSTD2/KIF26B/PTCH1/BMP4/CAT/SMAD4/FGFR2/GREB1L/PBX1/BDNF/OSR1/SMAD7/FAT4/SMAD3/PKD2/GATA3/WNT4/GDF11/SMAD1/AGT/LGR4/SPRY1/SLIT2/PAX8/DCHS1/GZF1/SHH/GLI3/WNT2B/FGFR1/CTNNBIP1/NPNT/BASP1/PKD1/VEGFA/RARB/SMO/FGF2	40
	BP	GO:0061458	reproductive system development	126/3670	447/18866	4.08621e-06	0.000452548	0.000379881	EIF2B2/NR2F2/CDX2/KRT19/HS6ST1/HIF1A/TGFB2/HTRA1/GJB3/PTCH1/ADAM15/FZD5/BMP4/SMAD4/FGFR2/PPARG/VASH1/RXRA/KRT8/TBX3/CCN1/GREB1L/PLCD3/GATA4/TGFBR1/JUNB/H3-3B/SPINT2/OSR1/MAMLD1/FZD4/ADM/VDR/ARID1A/TLR3/FKBP4/BMPR1B/PKD2/GATA3/AKT1/STRA6/TBC1D20/BCL2L2/BCL2L1/ADGRG1/SERPINF1/CST3/H3-3A/HSD17B2/WNT4/ADAMTS1/HSD17B4/SPINT1/ARID5B/SGPL1/PRDX3/LGR4/MAP3K4/TFEB/PSAP/MKKS/STC2/SLIT2/EGLN1/GLI2/INHA/RHOB…	126
	BP	GO:0051098	regulation of binding	107/3670	367/18866	4.19214e-06	0.000459063	0.00038535	S100A10/MET/ADAM15/BMP4/ADRB2/LRP1/SMAD4/CAPRIN2/PPARG/CLN5/DISC1/HMGA2/PIM2/P2RY1/ANXA2/SRI/DKK1/SMARCD3/TGFBR1/ZBTB7C/BDNF/LDLRAP1/AMFR/EPHA4/FBH1/H1-0/CYLD/NRP1/STING1/SIRT2/CEBPG/SMAD3/PRKACA/DDIT3/ATP2A3/ZNF304/IFI16/PCBD1/HIPK2/GATA3/ABL1/AKT1/PLXND1/IFIT2/ID2/APP/CDCA5/MARK2/TGFBR3/ISL1/HJURP/PINX1/DAB2/SPPL3/NME1/TCF7L2/DDX11/SKI/ZNF462/E2F1/NIBAN2/PLK2/TGFB1/TRIM6/HDAC4/EPB41/PCSK9/AURKA…	107
	BP	GO:0045666	positive regulation of neuron differentiation	110/3670	380/18866	4.44351e-06	0.000481183	0.000403918	FZD1/ETV5/LPAR1/VLDLR/SYT17/BMP4/PLXNC1/ITGA3/LRP8/LRP1/CAPRIN2/ENC1/RASAL1/DISC1/NEGR1/ARSB/RETREG3/DKK1/SEMA4D/BDNF/CRTC1/ROR1/FZD4/EPHA4/SCN1B/LYN/WNT3/ZEB1/NRP1/COBL/NRCAM/TIAM2/DDX56/SYT1/ROBO1/DLG4/P3H1/DAB2IP/PLXND1/CNTN1/BCL6/PLXNB1/PRKD1/PROX1/SERPINF1/PTK6/CYB5D2/TIMP2/SCARF1/SHANK3/NME2/TCF12/RAPGEF1/TRAK1/TRIM32/AGT/MARK2/ZFYVE27/CREB3L2/ARHGEF2/SLIT2/NME1/NIN/STYXL1/NPTN/MEGF8/GLI2/F…	110
	BP	GO:0030278	regulation of ossification	68/3670	212/18866	7.96442e-06	0.000837962	0.000703408	HIF1A/TGFB2/PTCH1/BMP4/ADRB2/FGFR2/KREMEN1/FAM20C/AXIN2/TFAP2A/CSF1/CCN1/TMEM64/DKK1/SEMA4D/PBX1/OSR1/PTGER4/CLIC1/IL6R/SMAD7/LRP3/CDK6/EGR2/TGFB3/SUFU/SMAD3/PRKACA/LRP5/BMPR1B/ZHX3/CHSY1/PRKD1/IL6ST/ID2/TOB2/RASSF2/WNT4/RFLNA/TOB1/SMAD1/BCOR/LIMD1/ACVR1/SKI/GLI3/LTBP3/TGFB1/ISG15/NOTCH1/HDAC4/FBXO5/CEBPD/SMOC1/CTNNBIP1/NPNT/REST/PKDCC/JAG1/TWSG1/RUNX2/CEBPB/BMPR2/LRP6/IFITM1/ADGRV1/ID1/MDK	68
	BP	GO:0110020	regulation of actomyosin structure organization	39/3670	102/18866	7.99615e-06	0.000837962	0.000703408	LPAR1/S100A10/TACSTD2/LIMCH1/MET/PPM1F/SMAD4/RAC1/DLC1/ASAP3/ARHGEF5/TGFBR1/PTGER4/NRP1/WASF2/TGFB3/SMAD3/PIK3R1/ABL1/ARHGEF10L/PROX1/WNT4/CCDC88A/CGNL1/MKKS/RHOC/MTOR/CCN2/EPHA1/SH3PXD2B/TPM1/FHOD1/EVL/ARHGEF18/ALMS1/ECT2/EDN1/SERPINF2/ROCK1	39
	BP	GO:1903076	regulation of protein localization to plasma membrane	39/3670	102/18866	7.99615e-06	0.000837962	0.000703408	EPHB2/ARHGAP44/VIL1/PRKCH/ITGA3/LRP1/CIB1/EZR/EPHA2/STAC/PRNP/LDLRAP1/CNPY4/PIK3R1/AKT1/TMBIM1/LGALS3/BCL2L1/VAMP8/NUMB/ZDHHC7/SORBS1/CSK/RAB11FIP2/DAB2/STX4/TGFB1/EGFR/LYPD1/PKDCC/CLIP3/SPTBN1/MMP14/ATP2B4/NKD2/GBP1/AGR2/RSC1A1/PRKCE	39
	BP	GO:0060412	ventricular septum morphogenesis	22/3670	45/18866	8.23486e-06	0.000846678	0.000710724	FZD1/TGFB2/BMP4/SMAD4/FGFR2/TBX3/TGFBR1/SMAD7/ROBO1/SAV1/PROX1/ID2/TGFBR3/FZD2/ACVR1/SLIT2/EGLN1/NOTCH1/CITED2/BMPR2/ZFPM1/FGFRL1	22
	BP	GO:0061326	renal tubule development	37/3670	95/18866	8.25307e-06	0.000846678	0.000710724	PGF/TACSTD2/KIF26B/PTCH1/BMP4/SMAD4/GREB1L/PBX1/OSR1/WNK4/FAT4/MTSS1/PKD2/GATA3/DLL1/WNT4/AGT/PROM1/LGR4/PAX8/DCHS1/GZF1/SHH/GLI3/NOTCH1/WNT2B/LGR5/CTNNBIP1/NPNT/LIF/PKD1/JAG1/VEGFA/NOTCH2/COL4A1/SMO/FGF2	37
	BP	GO:0045619	regulation of lymphocyte differentiation	60/3670	181/18866	8.57014e-06	0.000861447	0.000723122	SLAMF8/TMEM131L/BMP4/GAS6/HLA-G/ZMIZ1/DTX1/CD74/MYB/CD27/XBP1/KAT2A/CYLD/SMAD7/ZEB1/ERBB2/EGR3/TNFSF4/GATA3/ABL1/BCL6/IL18/SYK/RASGRP1/IL23A/IL7/ID2/ZBTB7B/ZBTB1/FLT3LG/CAMK4/MALT1/NFKBID/RUNX1/ITPKB/NFKBIZ/NRARP/GLI2/INHA/ZC3H12A/SHH/GLI3/VSIR/BTN2A2/PRDM1/INPP5D/DUSP10/TNFSF9/ATP11C/MMP14/AXL/FANCD2/NFATC2/JAK3/PCK1/CD83/FOXP3/CYP26B1/MDK/ADAM8	60
	BP	GO:0033627	cell adhesion mediated by integrin	30/3670	71/18866	8.76318e-06	0.000861447	0.000723122	TGFB2/PODXL/CIB1/PLPP3/ITGB2/ITGB4/EPHA2/LYN/FERMT3/LPXN/ITGB7/ITGB6/FBN1/CYP1B1/SYK/SWAP70/COL16A1/JAM3/ITGA5/CCN3/DPP4/NPNT/TESC/LIF/PDE3B/ITGB8/EFNA1/ITGB3/ICAM1/WNK1	30
	BP	GO:0009100	glycoprotein metabolic process	117/3670	415/18866	8.81807e-06	0.000861447	0.000723122	CHST11/SOAT1/HS6ST1/HIF1A/FUT6/GCNT1/CHST15/ST3GAL5/ST8SIA4/B3GNT3/POGLUT3/ST3GAL1/MUC6/MAN1C1/MAN1A1/MUC5B/B3GNT9/GALNT10/ST3GAL4/ST6GALNAC6/ARSB/GOLPH3/BACE2/SLC39A8/NPC1/CSGALNACT1/ABO/GPC1/ST6GAL1/GALNT11/HS3ST3B1/GALNT18/GALNT2/NDST1/DSE/UST/EXTL3/CSGALNACT2/AMFR/FUT4/VCAN/FUT3/CHST10/ST3GAL3/FBXO27/MGAT2/UBE2J1/BMPR1B/DHDDS/GCNT4/DERL3/EXT1/ST6GALNAC2/CHSY1/MAN2B1/TRIP11/ST6GALNAC1/CTSL/ENG…	117
	BP	GO:0090287	regulation of cellular response to growth factor stimulus	92/3670	310/18866	8.85609e-06	0.000861447	0.000723122	FZD1/CHST11/PRDM16/VASN/HIF1A/HTRA1/ADGRA2/BMP4/ITGA3/ENG/SMAD4/FAM20C/THBS1/FGFBP1/CCN1/EMILIN1/GPC1/DKK1/GATA4/TGFBR1/FGF18/VEPH1/LTBP4/FSTL1/PEG10/FZD4/SMAD7/ZEB1/TGFB3/SMAD3/ROBO1/FBN1/ONECUT2/SPRED1/HHEX/HIPK2/GATA3/ABL1/DAB2IP/DLL1/LTBP1/SDCBP/WNT4/TOB1/AGT/PELO/TGFBR3/ITGA5/GLG1/HGS/SPRY1/SLIT2/DAB2/NPTN/SKI/FOLR1/NIBAN2/NBL1/PPM1A/TGFB1/MYOF/SPRY2/NEO1/NOTCH1/FGFR1/ARNT/SORL1/NPNT/DSTYK/H…	92
	BP	GO:0030038	contractile actin filament bundle assembly	40/3670	106/18866	8.92737e-06	0.000861447	0.000723122	LPAR1/S100A10/TACSTD2/LIMCH1/MET/PPM1F/RAC1/DLC1/ASAP3/ARHGEF5/TGFBR1/PTGER4/NRP1/WASF2/TGFB3/SMAD3/PIK3R1/ABL1/ARHGEF10L/KCTD13/WNT4/CCDC88A/SORBS1/CGNL1/MKKS/RHOC/MTOR/FAM171A1/PDLIM1/CCN2/EPHA1/SH3PXD2B/TPM1/FHOD1/EVL/ARHGEF18/ALMS1/PHACTR1/SERPINF2/ROCK1	40
	BP	GO:0043149	stress fiber assembly	40/3670	106/18866	8.92737e-06	0.000861447	0.000723122	LPAR1/S100A10/TACSTD2/LIMCH1/MET/PPM1F/RAC1/DLC1/ASAP3/ARHGEF5/TGFBR1/PTGER4/NRP1/WASF2/TGFB3/SMAD3/PIK3R1/ABL1/ARHGEF10L/KCTD13/WNT4/CCDC88A/SORBS1/CGNL1/MKKS/RHOC/MTOR/FAM171A1/PDLIM1/CCN2/EPHA1/SH3PXD2B/TPM1/FHOD1/EVL/ARHGEF18/ALMS1/PHACTR1/SERPINF2/ROCK1	40
	BP	GO:0110053	regulation of actin filament organization	84/3670	278/18866	1.01614e-05	0.000970916	0.000815013	IQANK1/LPAR1/S100A10/TACSTD2/LIMCH1/VILL/MET/BAIAP2L1/VIL1/PPM1F/RAC1/DLC1/ASAP3/WASH6P/ARHGEF5/TGFBR1/CORO1A/PTGER4/SYNPO/HCLS1/CFL2/NRP1/TMSB10/WASF2/TGFB3/SMAD3/CAPZB/PIK3R1/IQGAP2/ESAM/ABL1/COTL1/ARHGEF10L/TRIOBP/FCHSD2/SWAP70/FHOD3/WNT4/CCDC88A/SHANK3/CDC42EP3/PDXP/SCIN/CGNL1/SPTB/MKKS/SLIT2/RHOC/FCHSD1/MTOR/TMOD2/BIN1/PYCARD/CCN2/SSH1/EPHA1/SH3PXD2B/TMOD1/FLNA/SH3BP1/TPM1/FHOD1/LATS1/EPS8/W…	84
	BP	GO:0048661	positive regulation of smooth muscle cell proliferation	39/3670	103/18866	1.0474e-05	0.00099106	0.000831922	BMP4/PDGFD/CALCRL/FGFR2/THBS1/PTAFR/TGM2/PPARGC1A/MYB/LDLRAP1/IL6R/AKT1/GNAI2/IL18/ABCC4/ID2/ADAMTS1/AGT/MFN2/MTOR/PHB/DNMT1/CYBA/HMGCR/EGFR/HDAC4/NOTCH3/NAMPT/FGF9/MEF2D/HMOX1/RBPMS2/AKR1B1/EDN1/SERPINF2/JUN/GJA1/FGF2/ERN1	39
	BP	GO:0030900	forebrain development	111/3670	391/18866	1.06033e-05	0.000993648	0.000834095	EPHB2/NR2F2/EPHB3/LPAR1/HIF1A/PTPRS/AKNA/BMP4/ALDH1A2/ZMIZ1/LRP8/LRP1/FGFR2/DYNC2H1/DISC1/TBX3/DLC1/BTG2/PPARGC1A/DKK1/OXTR/NDST1/KAT2A/NRP1/CDK6/FAT4/ATAT1/SUN2/ARID1A/LAMB1/AQP1/ROBO1/DAB2IP/EXT1/NSUN5/DIXDC1/MYH10/ADGRG1/PROX1/ID2/BTBD3/XRN2/APP/HERC1/SUN1/NUMB/WNT4/RPGRIP1L/SHANK3/BBS2/ATIC/ISL1/MKKS/SLIT2/NME1/OTX1/NIN/SLC2A1/GLI2/SKI/ARL13B/EFNA2/E2F1/SEMA3A/CCDC85C/SYNE2/SHH/GLI3/ZSWIM6/OP…	111
	BP	GO:0070507	regulation of microtubule cytoskeleton organization	62/3670	190/18866	1.07452e-05	0.00099736	0.000837211	MET/RAC1/CIB1/MAPRE2/MAP1A/KAT2A/CYLD/SNCA/ATAT1/CHMP4C/MID1/FKBP4/ABL1/KAT2B/POC1A/DIXDC1/MID1IP1/TRIM36/TPX2/MARK2/HDGFL3/SKA3/ARHGEF2/MECP2/CHMP2B/PHLDB1/MAPK15/NIN/BICD2/PLK2/TOGARAM2/TOGARAM1/SPAG5/AURKA/KATNB1/DYRK1A/PKD1/SLAIN2/MAP2/MAPT/CHEK1/DYNC1H1/NEK2/STMN3/CEP97/CLIP3/PKHD1/BRCA1/TPPP/CCP110/TTBK2/AKAP9/CEP295NL/ALMS1/MAP1B/GNAI1/PLK1/MAP9/CDK5R1/STIL/PLK4/ROCK1	62
	BP	GO:0032388	positive regulation of intracellular transport	70/3670	222/18866	1.13512e-05	0.00103503	0.000868836	SFN/FZD5/GAS6/CIB1/ITGB2/EZR/ANXA2/PRNP/PRR5L/LDLRAP1/JUP/RAC2/HCLS1/ABLIM3/ERBB2/SREBF2/SMAD3/RBM26/YWHAZ/PRKACA/PIK3R1/HYAL2/TBC1D20/CD81/ZPR1/MSN/CACNB3/ATP2A1/PPP1R13B/EDEM1/SCP2/SEC16A/DAB2/TCF7L2/NPEPPS/ZC3H12A/E2F1/SHH/GLI3/PPM1A/TGFB1/SPAG5/BCAP31/BBC3/VAMP2/EHD2/FLNA/SORL1/FYN/RIPOR1/HSP90AB1/MAP2/DYNC1H1/ANK3/STOM/MAVS/RAB29/TCAF1/TCAF2/SMO/ECT2/MTCL1/GTSE1/CDK1/CDK5R1/CAMK1/RDX/C2CD5/T…	70
	BP	GO:0061008	hepaticobiliary system development	50/3670	144/18866	1.13635e-05	0.00103503	0.000868836	PTPN3/PTCH1/MET/ALDH1A2/CDK5RAP3/LSR/MKS1/XBP1/AACS/COBL/CEBPG/SMAD3/ONECUT2/PKD2/PHF2/PROX1/UGT1A1/WNT4/RPGRIP1L/FPGS/ARID5B/TGFBR3/CLDN1/RAP1A/GLI3/NOTCH1/EGFR/IGF2R/PCSK9/AURKA/WDR35/PKD1/CITED2/HMOX1/TNFAIP3/NOTCH2/E2F7/CEBPB/ASNS/JARID2/HNF1A/MAN2A1/DBP/EZH2/CCDC40/HNF4A/JUN/PCK1/TYMS/MDK	50
	BP	GO:0033559	unsaturated fatty acid metabolic process	43/3670	118/18866	1.17271e-05	0.00105826	0.000888335	PLA2G4F/SCD5/CYP2S1/ACSL1/DEGS1/PTGS1/CD74/FAAH2/AKR1C4/PLA2G4A/LTC4S/EPHX1/FADS2/PLA2G10/FADS1/GPX4/CYP1B1/ZADH2/PRXL2B/PIBF1/ACOX1/HSD17B4/FABP5/SCP2/GSTA1/DAGLA/CYP2D7/DAGLB/ACOT8/ELOVL5/CYP2U1/CYP2E1/DECR2/PTGES3/PTGES/FADS3/TBXAS1/FAAH/ABCD1/CYP4F12/EDN1/CYP4F11/PLA2G4C	43
	BP	GO:0009791	post-embryonic development	34/3670	86/18866	1.29798e-05	0.00116056	0.000974204	CHST11/FZD5/BMP4/FGFR2/HEG1/ITPR1/EFEMP1/TGFBR1/RAB3A/FBN1/ACO1/GATA3/ABL1/PPP1R13L/ARID5B/SGPL1/MECP2/CSRNP1/MTOR/ATM/IGF2R/MYO1E/PRDM1/VEGFA/SLC18A2/MYO7A/ASH1L/SOX6/C12orf57/PLEKHA1/AGO2/SELENOP/ATRX/NR4A2	34
	BP	GO:0001889	liver development	49/3670	141/18866	1.348e-05	0.00119433	0.00100255	PTPN3/PTCH1/MET/ALDH1A2/CDK5RAP3/LSR/XBP1/AACS/COBL/CEBPG/SMAD3/ONECUT2/PKD2/PHF2/PROX1/UGT1A1/WNT4/RPGRIP1L/FPGS/ARID5B/TGFBR3/CLDN1/RAP1A/GLI3/NOTCH1/EGFR/IGF2R/PCSK9/AURKA/WDR35/PKD1/CITED2/HMOX1/TNFAIP3/NOTCH2/E2F7/CEBPB/ASNS/JARID2/HNF1A/MAN2A1/DBP/EZH2/CCDC40/HNF4A/JUN/PCK1/TYMS/MDK	49
	BP	GO:0043547	positive regulation of GTPase activity	114/3670	406/18866	1.39381e-05	0.00122379	0.00102728	SNX18/S100A10/PLEKHG6/ARHGAP44/DOCK8/ALDH1A1/TBC1D4/RAP1GAP/RIC8B/RASAL1/SRGAP3/TBC1D2B/DLC1/ASAP3/EPHA2/SIPA1L1/SEMA4D/ARHGEF5/TBC1D13/MAPRE2/VAV1/RSU1/GNB5/ALS2CL/DOCK11/NRP1/RGS5/ADAP1/TIAM2/ERBB2/RGP1/TBC1D10C/MTSS2/DAB2IP/DOCK9/RGL3/SMAP2/SEC23B/ARHGEF10L/IQSEC1/TBC1D20/RGS3/GNAQ/RASGRP1/PLXNB1/TBC1D8/EVI5L/ARHGAP27/GIT2/WNT4/TBC1D16/RAPGEF1/ARHGEF19/TBC1D9/RAB11FIP2/ERRFI1/ARHGEF26/RIN1/CHN…	114
	BP	GO:0052697	xenobiotic glucuronidation	9/3670	11/18866	1.48316e-05	0.00129061	0.00108338	UGT1A8/UGT1A9/UGT1A3/UGT1A7/UGT1A5/UGT1A4/UGT1A10/UGT1A1/UGT1A6	9
	BP	GO:0071466	cellular response to xenobiotic stimulus	44/3670	123/18866	1.60059e-05	0.00137448	0.00115377	CYP2W1/CYP2S1/ACSL1/RORC/PTGS1/CYB5R3/RORA/ALDH3A1/EPHX1/ACY1/SULT1A2/AOC1/CYP1B1/UGT1A8/UGT1A9/UGT1A3/UGT1A7/UGT1A5/AADAC/UGT1A4/UGT1A10/UGT1A1/UGT1A6/GSTA1/AKR7A2/E2F1/CYP2D7/SULT1A1/ARNT2/CRYZ/ARNT/CYP2U1/CYP2E1/HSP90AB1/GSTM3/PTGES3/GSTM4/CYP3A5/CYP2R1/RB1/NQO1/HNF4A/ACSM1/CYP26B1	44
	BP	GO:0050708	regulation of protein secretion	101/3670	352/18866	1.60774e-05	0.00137448	0.00115377	ADCY5/HIF1A/TGFB2/KCNS3/SCAMP5/TLR5/LRP1/RAC1/ARL2BP/MYRIP/EZR/GOLPH3/ITPR1/SRI/BAIAP3/CD14/ICA1/OXCT1/PTGER4/TLR2/HLA-DRB1/IDH2/LYN/XBP1/AACS/ITPR2/JAGN1/TGFB3/TLR4/LRP5/TNFSF4/UNC13B/P3H1/TLR6/RHBDF1/SYK/MCU/NR1D1/GLUL/MYH10/ARNTL/FRMD4A/MYO18A/LGR4/ATP13A2/RAB11FIP3/ISL1/ACHE/PPIA/BRSK2/GAPDH/CCN3/SLC12A2/SLC2A1/TCF7L2/HMGN3/ACSL4/F2R/FKBP1B/GIPR/UQCC2/STX4/RAB11FIP5/ADORA2A/RAP1A/HLA-E/HADH/D…	101
	BP	GO:0030217	T cell differentiation	77/3670	253/18866	1.76107e-05	0.00149247	0.00125282	FZD8/TMEM131L/FZD5/BMP4/HLA-G/ZMIZ1/RORC/DTX1/IL18R1/CD74/RORA/VAV1/EGR1/MYB/SEMA4A/PTGER4/MR1/FZD7/CD27/XBP1/KAT2A/CYLD/SMAD7/ZEB1/CDK6/ERBB2/EGR3/TNFSF4/GATA3/ABL1/BCL6/IL18/SYK/RASGRP1/IL23A/IL7/CTSL/ZBTB7B/ZBTB1/WNT4/CAMK4/MALT1/NFKBID/RUNX1/ITPKB/NFKBIZ/NRARP/PSAP/GLI2/ZC3H12A/MTOR/JAG2/SHH/GLI3/VSIR/BTN2A2/PRDM1/PIK3CD/B2M/RUNX2/DUSP10/TNFSF9/RSAD2/LEPR/FANCD2/NFATC2/LFNG/ZFPM1/SATB1/GPR89B…	77
	BP	GO:0045580	regulation of T cell differentiation	51/3670	150/18866	1.80959e-05	0.00152037	0.00127624	TMEM131L/BMP4/HLA-G/ZMIZ1/DTX1/CD74/MYB/CD27/XBP1/KAT2A/CYLD/SMAD7/ZEB1/ERBB2/EGR3/TNFSF4/GATA3/ABL1/BCL6/IL18/SYK/RASGRP1/IL23A/IL7/ZBTB7B/ZBTB1/CAMK4/MALT1/NFKBID/RUNX1/ITPKB/NFKBIZ/NRARP/GLI2/ZC3H12A/SHH/GLI3/VSIR/BTN2A2/PRDM1/DUSP10/TNFSF9/FANCD2/NFATC2/JAK3/PCK1/CD83/FOXP3/CYP26B1/MDK/ADAM8	51
	BP	GO:0009612	response to mechanical stimulus	66/3670	209/18866	1.88751e-05	0.00155898	0.00130865	PTCH1/TLR5/ENG/RAC1/MEIS2/PPARG/THBS1/P2RY1/BTG2/CASP1/GATA4/DMD/SLITRK6/JUP/PTGER4/FOSB/TLR3/TLR4/AQP1/PKD2/COL1A1/AKT1/NFKB1/STRA6/ETV1/PPL/SUN1/TMEM150C/SHANK3/BCL10/AGT/CACNB3/MKKS/BACE1/TNFRSF10B/SLC2A1/CLCN6/CYBA/EGFR/HDAC4/CXCR4/SERPINE2/FYN/PKD1/KCNJ2/ASIC3/MAP3K1/CHEK1/CNN2/LHFPL5/ASNS/MMP14/FOSL1/KIAA0319/TMEM120A/MAP1B/CCNB1/EDN1/ADGRV1/TNC/JUN/ETS1/USP53/PKD2L2/MDK/GJA1	66
	BP	GO:0016051	carbohydrate biosynthetic process	67/3670	213/18866	1.88754e-05	0.00155898	0.00130865	CHST11/CHST15/B3GNT3/SIRT7/B3GNT9/ST3GAL4/PTAFR/ST6GALNAC6/P2RY1/PPARGC1A/CSGALNACT1/SLC39A14/PGD/NDST1/CSGALNACT2/FUT3/CHST10/KAT2A/SNCA/NTSR1/MGAT2/AKT1/KAT2B/EXT1/NFKB1/NR1D1/ST6GALNAC1/SLC25A10/FAM3C/CHST14/SORBS1/TPI1/PDXP/NDST2/MST1/GAPDH/SLC2A1/MTOR/PHKG2/TGFB1/ST3GAL2/IMPA2/CRY1/B4GALT5/GBE1/FBP1/ALDOA/CHST12/SLC37A4/PPP1R3E/SOGA1/GYG2/B3GALNT1/DGAT2/LEPR/B3GNT7/SLC35B4/EP300/AKR1B1/GPD1/…	67
	BP	GO:0071902	positive regulation of protein serine/threonine kinase activity	99/3670	345/18866	1.93336e-05	0.0015834	0.00132915	FZD8/LPAR1/PDGFC/MST1R/FZD5/BMP4/ACSL1/ADRB2/PDGFD/ERN2/IRAK2/CDC6/THBS1/CIB1/TPD52L1/HMGA2/CD74/ADORA1/DKK1/ARHGEF5/TGFBR1/FGF18/CCND2/SLC27A1/MAP3K3/FZD4/EPHA4/CXCL17/MAPK11/SNCA/MAPKAPK2/TGFB3/ERBB2/TLR4/CKS1B/ROBO1/PKD2/TLR6/AKT1/DAB2IP/SYK/FGD2/SPATC1L/RASGRP1/PROX1/PDE5A/CD81/SASH1/MAP3K20/DIPK2A/RAPGEF1/AGT/GADD45B/MAP3K4/PIK3CB/CSK/PEA15/MDFIC/ITGA1/F2R/TGFB1/SPRY2/IQGAP3/EGFR/FGFR1/CXCR4…	99
	BP	GO:0022407	regulation of cell-cell adhesion	121/3670	439/18866	1.971e-05	0.00158772	0.00133277	PTPRU/EPHB3/EPCAM/DOCK8/KIF26B/TMEM131L/IL1RN/CDSN/AKNA/BMP4/HLA-G/ZMIZ1/PPM1F/RAC1/DTX1/PODXL/PLPP3/HLA-DMB/ITGB2/PTAFR/TNFRSF21/CD74/CCL28/PRNP/VAV1/CORO1A/MYB/HSPD1/SPINT2/FUT4/CD27/HLA-DRB1/FUT3/LYN/XBP1/CYLD/SMAD7/SH2B3/FERMT3/ERBB2/EGR3/PIK3R1/TNFSF4/GATA3/ABL1/AKT1/BCL6/IL18/SYK/LGALS3/RASGRP1/IL23A/IL7/SWAP70/IL6ST/PDE5A/CD81/KIFAP3/ZBTB7B/IL27RA/ZBTB1/CELSR2/CCDC88B/CD9/WNT4/MALT1/BCL10/…	121
	BP	GO:0051492	regulation of stress fiber assembly	35/3670	91/18866	1.9712e-05	0.00158772	0.00133277	LPAR1/S100A10/TACSTD2/LIMCH1/MET/PPM1F/RAC1/DLC1/ASAP3/ARHGEF5/TGFBR1/PTGER4/NRP1/WASF2/TGFB3/SMAD3/PIK3R1/ABL1/ARHGEF10L/WNT4/CCDC88A/CGNL1/MKKS/RHOC/MTOR/CCN2/EPHA1/SH3PXD2B/TPM1/FHOD1/EVL/ARHGEF18/ALMS1/SERPINF2/ROCK1	35
	BP	GO:0061333	renal tubule morphogenesis	31/3670	77/18866	2.01439e-05	0.00160397	0.00134641	PGF/TACSTD2/KIF26B/PTCH1/BMP4/SMAD4/GREB1L/PBX1/OSR1/WNK4/FAT4/MTSS1/PKD2/GATA3/WNT4/AGT/LGR4/PAX8/DCHS1/GZF1/SHH/GLI3/WNT2B/LGR5/CTNNBIP1/NPNT/PKD1/VEGFA/COL4A1/SMO/FGF2	31
	BP	GO:0030111	regulation of Wnt signaling pathway	106/3670	375/18866	2.0243e-05	0.00160397	0.00134641	TLE4/PTPRU/FZD1/NXN/PRICKLE1/WWOX/TMEM131L/ADGRA2/IGFBP4/ITGA3/LRP1/CAPRIN2/FGFR2/KREMEN1/AXIN2/DISC1/PLPP3/TMEM64/DKK1/EGR1/ZNRF3/JUP/AMFR/TLR2/FZD4/FZD7/MKS1/ATP6V1C2/WNT3/CYLD/TLE1/SMAD3/CCDC88C/DDIT3/HHEX/FAM53B/CDK14/WNK2/TLE2/COL1A1/ABL1/PSMC5/SOX7/DAB2IP/PSMC4/PSMD3/HIC1/NFKB1/GNAQ/DIXDC1/ARNTL/APP/PSMD13/RAPGEF1/TBX18/RUNX1/CDH3/PSMB8/LGR4/ISL1/LIMD1/GID8/NRARP/LGR6/MDFIC/DAB2/TCF7L2/SKI/…	106
	BP	GO:0042493	response to drug	111/3670	397/18866	2.1975e-05	0.00172716	0.00144982	PGF/FZD1/FABP3/S100A10/ABCA3/TGFB2/SLAMF8/KCNQ1/PTCH1/PTPRM/CYP2W1/CYP2S1/GAS6/ACSL1/ITGA3/CAT/LRP8/ENG/PPM1F/FECH/PPARG/THBS1/HMGA2/NPC1/PPARGC1A/GATA4/PRNP/OXTR/PRKAR2B/LDHA/HSPD1/OXCT1/BDNF/ALDH3A1/EFTUD2/GNA12/LYN/AACS/ABCC3/PDE4B/RECQL5/FOSB/CARD9/TLR3/AQP1/AOC1/COL1A1/GATA3/SLC46A1/EEF2/SRP68/MYO6/ABCC4/UGT1A1/PDE3A/CST3/RAD51/TIMP2/LCN2/GCLM/CDH3/MTHFR/SRP54/AGPAT2/SMPD1/RNF149/NME1/NNMT/A…	111
	BP	GO:0043405	regulation of MAP kinase activity	98/3670	342/18866	2.26098e-05	0.00176284	0.00147978	EPHB2/FZD8/LPAR1/PDGFC/MST1R/FZD5/BMP4/PDGFD/ERN2/IRAK2/TRIB2/THBS1/CDK5RAP3/TPD52L1/CD74/ADORA1/DKK1/ARHGEF5/TGFBR1/FGF18/MAP3K3/FZD4/EPHA4/CXCL17/LYN/SH2B3/MAPK11/MAPKAPK2/TGFB3/ERBB2/DUSP1/TLR4/ROBO1/CBLC/SPRED1/HYAL2/TLR6/DAB2IP/SYK/FGD2/RGS3/RASGRP1/PDE5A/CD81/SASH1/MAP3K20/RAPGEF1/AGT/GADD45B/MAP3K4/PIK3CB/CSK/HGS/SPRY1/SMPD1/PEA15/MDFIC/ITGA1/PDCD4/MBIP/F2R/DUSP16/TGFB1/SPRY2/HMGCR/IQGAP3/…	98
	BP	GO:0120254	olefinic compound metabolic process	43/3670	121/18866	2.3912e-05	0.00184957	0.00155258	H6PD/CYP2S1/ALDH1A2/ACSL1/SDR16C5/PTGS1/PPARGC1A/EGR1/FAAH2/RDH11/AKR1C4/PLA2G4A/EPHX1/ADM/FADS2/PLA2G10/FADS1/GPX4/CYP1B1/ACOX1/WNT4/HSD17B4/SCP2/GSTA1/DAGLA/STARD3/CYP2D7/DAGLB/ACOT8/ELOVL5/CYP2U1/REST/CYP2E1/PTGES3/PTGES/ALDH1A3/TBXAS1/FAAH/ABCD1/CYP4F12/CYP4F11/PLA2G4C/CLCN2	43
	BP	GO:0009812	flavonoid metabolic process	11/3670	16/18866	2.45444e-05	0.00188354	0.0015811	PPARGC1A/UGT1A8/UGT1A9/UGT1A3/UGT1A7/UGT1A5/UGT1A4/UGT1A10/UGT1A1/UGT1A6/SULT1A1	11
	BP	GO:0003014	renal system process	44/3670	125/18866	2.5343e-05	0.00192963	0.00161978	CLDN4/AQP3/ADCY5/KCNQ1/BMP4/GAS6/ITGA3/ADORA1/PRKAR2B/ADCY9/SGK1/WNK4/LGMN/ADM/PRKACA/AQP1/HYAL2/GNAI2/SLC15A2/AGT/RAB11FIP2/PSAP/F2R/ADCY1/ADCY4/ADORA2A/CYBA/MYO1E/BTC/PRKACB/ADCY3/WFS1/MCAM/TBC1D8B/HNF1A/CYP4F12/AKR1B1/ADCY7/HSD11B2/PCSK5/EDN1/AKAP11/SERPINF2/GJA1	44
	BP	GO:0045582	positive regulation of T cell differentiation	35/3670	92/18866	2.59153e-05	0.00195791	0.00164352	HLA-G/ZMIZ1/CD74/MYB/CD27/XBP1/CYLD/EGR3/TNFSF4/GATA3/BCL6/IL18/SYK/RASGRP1/IL23A/IL7/ZBTB7B/ZBTB1/MALT1/NFKBID/RUNX1/ITPKB/NFKBIZ/GLI2/SHH/GLI3/VSIR/BTN2A2/DUSP10/TNFSF9/PCK1/CD83/FOXP3/MDK/ADAM8	35
	BP	GO:1905475	regulation of protein localization to membrane	62/3670	195/18866	2.64169e-05	0.00198046	0.00166245	EPHB2/ARHGAP44/SFN/VIL1/PRKCH/ITGA3/LRP1/CIB1/ITGB2/EZR/EPHA2/STAC/GPC1/PRNP/LDLRAP1/GPC4/AP2B1/CNPY4/ERBB2/YWHAZ/PIK3R1/AKT1/TMBIM1/LGALS3/BCL2L1/CD81/VAMP8/NUMB/ZDHHC7/CACNB3/PPP1R13B/SORBS1/CSK/RAB11FIP2/DAB2/E2F1/STX4/RAP1A/TGFB1/SSH1/BBC3/EGFR/LYPD1/FYN/PKDCC/ANK3/CLIP3/STOM/SPTBN1/MMP14/TCAF1/TCAF2/ATP2B4/NKD2/MTCL1/GBP1/AGR2/RSC1A1/CDK5R1/PRKCE/C2CD5/CEMIP	62
	BP	GO:0035272	exocrine system development	23/3670	51/18866	2.73627e-05	0.0020357	0.00170882	TGFB2/FGFR2/TGM2/XBP1/NRP1/TGFB3/PLXND1/NTN4/CST3/ESRP2/SRP54/BTBD7/SEMA3A/SHH/TGFB1/EGFR/FGFR1/IGSF3/TWSG1/PAX6/NKX3-1/TFCP2L1/CLCN2	23
	BP	GO:0001890	placenta development	52/3670	156/18866	2.79125e-05	0.00206087	0.00172995	NR2F2/CDX2/KRT19/HS6ST1/HIF1A/HTRA1/GJB3/FZD5/FGFR2/PPARG/VASH1/RXRA/KRT8/CCN1/PLCD3/JUNB/SPINT2/ADM/VDR/ARID1A/PKD2/AKT1/HSD17B2/SPINT1/PRDX3/MAP3K4/TFEB/STC2/EGLN1/EGFR/ARNT/PRDM1/LIF/PKD1/HSP90AB1/ITGB8/EPOR/PCDH12/SOCS3/NOTCH2/E2F7/CEBPB/SNAI1/BMPR2/FOSL1/ASH1L/CCDC134/TPPP3/PHLDA2/PLK4/EPAS1/GJA1	52
	BP	GO:0006805	xenobiotic metabolic process	42/3670	118/18866	2.83276e-05	0.00207579	0.00174248	CYP2W1/CYP2S1/ACSL1/RORC/PTGS1/CYB5R3/RORA/ALDH3A1/EPHX1/ACY1/SULT1A2/AOC1/CYP1B1/UGT1A8/UGT1A9/UGT1A3/UGT1A7/UGT1A5/AADAC/UGT1A4/UGT1A10/UGT1A1/UGT1A6/GSTA1/AKR7A2/CYP2D7/SULT1A1/ARNT2/CRYZ/ARNT/CYP2U1/CYP2E1/HSP90AB1/GSTM3/PTGES3/GSTM4/CYP3A5/CYP2R1/NQO1/HNF4A/ACSM1/CYP26B1	42
	BP	GO:0042552	myelination	47/3670	137/18866	2.91965e-05	0.00211399	0.00177454	EIF2B2/LPAR1/DEGS1/PMP22/KLK6/TNFRSF21/GPC1/CTSC/PLLP/TLR2/XK/MYO5A/SIRT2/EGR2/ERBB2/FA2H/AKT1/MAL2/NSUN5/QKI/ZPR1/CD9/JAM3/ATRN/B4GALT6/MBP/TNFRSF1B/PSAP/SKI/MTOR/B4GALT5/CXCR4/EIF2AK3/MALL/NTRK2/RARB/TPPP/CMTM8/NDRG1/ACER3/ABCD1/WASF3/DICER1/PRX/ABCA2/PIKFYVE/ADGRG6	47
	BP	GO:0098742	cell-cell adhesion via plasma-membrane adhesion molecules	82/3670	277/18866	2.92826e-05	0.00211399	0.00177454	CLDN4/EPCAM/CLDN2/DSC2/TGFB2/PTPRM/IL1RN/PTPRS/CLDN23/PCDHGA9/CELSR3/CLSTN3/PCDHGC3/PCDHGB6/PCDHGA4/PCDHGB1/CLDN7/PCDHGA6/PCDHGA12/PCDHGB7/PCDHGA3/PCDHGA2/PCDHGA11/PCDHGA1/PCDHGC5/PCDHGC4/PCDHGB3/PCDHGA8/PCDHGA5/PCDHGA7/ITGB2/PCDHGB4/PALLD/PCDHGA10/PCDHGB2/CDHR5/CDH17/CEACAM5/CDHR2/NECTIN4/GPC4/FAT4/CLSTN1/ROBO1/ESAM/IGSF9/CLDN9/DSG2/NECTIN3/KIFAP3/FLRT3/CELSR2/CDH24/ADGRL1/MBP/CDH3/ITGA5/ACVR1/A…	82
	BP	GO:0090596	sensory organ morphogenesis	80/3670	269/18866	3.04576e-05	0.00218265	0.00183217	EPHB2/HIF1A/SOBP/PTPRM/TSHZ1/SHROOM2/FZD5/BMP4/FGFR2/TFAP2A/EPHA2/EFEMP1/LRIG1/FJX1/MEIS1/SLITRK6/BDNF/OSR1/ZEB1/ARID1A/LRIG3/FBN1/LRP5/HIPK2/GATA3/TOPORS/DLL1/TRIOBP/NECTIN3/ZHX2/STRA6/MYO6/TBC1D20/PROX1/RPGRIP1L/GDF11/PROM1/TTC39C/COL5A2/FZD2/OTX1/GLI2/SKI/PAX8/MFN2/PHACTR4/GLI3/SPRY2/WNT2B/FGFR1/NTRK2/TENM3/PRDM1/FSCN2/INSIG1/JAG1/VEGFA/RARB/FGF9/ALDH1A3/PAX6/NOTCH2/LHFPL5/THRB/RPL38/MYO7A/NRL…	80
	BP	GO:0060348	bone development	64/3670	204/18866	3.13862e-05	0.00223278	0.00187425	TTC9/PDGFC/BMP4/ENG/FGFR2/FAM20C/AXIN2/TFAP2A/CSGALNACT1/ANXA2/SEMA4D/SPNS2/FGF18/MEIS1/ZNF385A/PTGER4/KAT2A/SH2B3/ANXA6/WASF2/FAT4/TGFB3/FBN1/LRP5/BMPR1B/COL1A1/P3H1/POC1A/CHSY1/PLXNB1/TRIP11/NPR2/RFLNA/SMAD1/PIP4K2A/GLG1/MEGF8/SKI/DCHS1/GLI3/LTBP3/RAB23/SH3PXD2B/AMER1/ANKRD11/INSIG1/RUNX2/RARB/MEF2D/XYLT1/NOTCH2/BMPR2/MMP14/LRP6/FOXN3/EP300/PHEX/ZFPM1/LRRK1/FGFR3/SERPINH1/CYP26B1/GJA1/COL27A1	64
	BP	GO:0006631	fatty acid metabolic process	110/3670	396/18866	3.23016e-05	0.00228124	0.00191494	FABP3/PLA2G4F/SCD5/ACSF2/CYP2S1/ACSL1/DEGS1/PPARG/C3/PTGS1/ACSL5/PPARGC1A/LIPH/CD74/LPIN3/PRKAR2B/CRAT/FAAH2/SLC27A1/AKR1C4/PLA2G4A/XBP1/AACS/LTC4S/MYO5A/EPHX1/FADS2/SLC27A2/LIPG/PLA2G10/FADS1/FA2H/GPX4/CYP1B1/AKT1/ZADH2/UGT1A8/PRXL2B/MLXIPL/PIBF1/UCP3/ACOX1/QKI/CYP4V2/ACOT11/MID1IP1/ERLIN2/HSD17B4/FABP5/PDP2/SGPL1/ACAA2/HACD4/WDTC1/SCP2/GSTA1/PDPR/PON2/ACADSB/DAGLA/ACSL4/TYSND1/MTOR/CYP2D7/CPT1B…	110
	BP	GO:0072080	nephron tubule development	35/3670	93/18866	3.38499e-05	0.00237339	0.00199229	PGF/TACSTD2/KIF26B/PTCH1/BMP4/SMAD4/GREB1L/PBX1/OSR1/WNK4/FAT4/MTSS1/PKD2/GATA3/DLL1/WNT4/AGT/PROM1/LGR4/PAX8/DCHS1/GZF1/SHH/GLI3/NOTCH1/WNT2B/CTNNBIP1/NPNT/LIF/PKD1/JAG1/VEGFA/NOTCH2/SMO/FGF2	35
	BP	GO:0002367	cytokine production involved in immune response	38/3670	104/18866	3.44277e-05	0.00239666	0.00201182	TGFB2/FZD5/GAS6/HLA-G/IL18R1/CD74/IL1R1/HSPD1/TLR2/MR1/SMAD7/TGFB3/TLR3/TLR4/TNFSF4/GATA3/BCL6/IL18/TRIL/CD81/MALT1/BCL10/TNFRSF1B/HLA-E/SCIMP/TGFB1/TRIM6/CD55/B2M/LACC1/HMOX1/BST2/RSAD2/MAVS/CD160/GPRC5B/JAK3/FOXP3	38
	BP	GO:0003229	ventricular cardiac muscle tissue development	24/3670	55/18866	3.59874e-05	0.00248747	0.00208805	TGFB2/ENG/DSP/SMAD4/FGFR2/RXRA/TBX3/HEG1/TGFBR1/FOXH1/SMAD7/PPP1R13L/DSG2/UBE4B/PROX1/ID2/TGFBR3/ISL1/TGFB1/TNNT2/NOTCH1/TPM1/TNNI1/ADAMTS9	24
	BP	GO:0010810	regulation of cell-substrate adhesion	67/3670	217/18866	3.6464e-05	0.00250267	0.0021008	S100A10/TACSTD2/LIMCH1/ADAM15/ITGA3/PPM1F/LRP1/RAC1/THBS1/CIB1/DISC1/CSF1/CCN1/EMILIN1/DLC1/CCL28/JUP/RSU1/RAC2/FZD4/FZD7/CCDC80/RHOD/NRP1/CDK6/SMAD3/ONECUT2/PIK3R1/COL1A1/ABL1/BCL6/TRIOBP/COL16A1/ATXN3/WNT4/UNC13D/ITGA5/PIK3CB/UTRN/NINJ1/FBLN1/EPHA1/NOTCH1/NEDD9/PLEKHA2/FLNA/NPNT/PEAK1/BST1/JAG1/SEMA3E/VEGFA/LGALS1/LDB1/DOCK5/PTPRJ/DOCK1/MMP14/MACF1/ITGA6/GBP1/AGR2/WDPCP/PRKCE/SPOCK2/ROCK1/MDK	67
	BP	GO:0031099	regeneration	63/3670	201/18866	3.71837e-05	0.00252137	0.0021165	PTPN3/PTPRU/PGF/MATN2/PTCH1/ADAM15/PTPRS/GAS6/LRP1/KREMEN1/PPARG/KLK6/GATA4/LCP1/NINJ2/FZD7/EPHA4/ADM/CD81/UGT1A1/CD9/SCARF1/JAM3/FPGS/ATIC/IFRD1/TGFBR3/TARBP2/ISL1/LGR6/CLDN1/CCN3/NINJ1/NNMT/FKBP1B/FOLR1/RAP1A/GLI3/NOTCH1/EGFR/IGF2R/AURKA/WDR35/LPIN1/MTR/HMOX1/DUSP10/CEBPB/AXL/KIAA0319/MAP1B/CCNB1/MUSTN1/PPP3CA/EZH2/TNC/PFKFB1/NREP/DYSF/JUN/CDK1/TYMS/MDK	63
	BP	GO:0007224	smoothened signaling pathway	48/3670	142/18866	3.7254e-05	0.00252137	0.0021165	PTCH1/DZIP1L/FGFR2/DYNC2H1/RORA/NDST1/MKS1/BOC/TXNDC15/SUFU/PRKACA/HIPK2/KIAA0586/CHSY1/TMEM231/B9D1/RPGRIP1L/PDCL/CC2D2A/ARL3/IFT52/MEGF8/GLI2/ARL13B/SHH/GLI3/HHAT/SERPINE2/PRKACB/RUNX2/FGF9/GLIS2/PAX6/PTCH2/TTBK2/HERC4/RB1/DCDC2/SMO/GORAB/ARL6/HIPK1/TEDC2/WNT9A/WDPCP/STIL/GPR37L1/RAB34	48
	BP	GO:0007173	epidermal growth factor receptor signaling pathway	43/3670	123/18866	3.75976e-05	0.00252708	0.00212129	PTPN3/GPRC5A/VIL1/GRB7/PIGR/EFEMP1/ADORA1/MVB12B/AFAP1L2/VPS25/CBLC/PIK3R1/ABL1/AKT1/DAB2IP/FAM83B/RHBDF1/PTK6/APP/RASSF2/CCDC88A/AGT/HGS/SPRY1/ERRFI1/ITGA1/TGFB1/SPRY2/EGFR/BTC/RPS6KA5/PTPRJ/GAREM1/PLAUR/STAM/HIP1/ERBIN/HAP1/SOCS4/TGFA/IFI6/GAB1/AGR2	43
	BP	GO:1905477	positive regulation of protein localization to membrane	44/3670	127/18866	3.9451e-05	0.00263349	0.00221062	EPHB2/SFN/VIL1/PRKCH/ITGA3/LRP1/CIB1/ITGB2/EZR/EPHA2/STAC/PRNP/AP2B1/CNPY4/ERBB2/YWHAZ/PIK3R1/AKT1/LGALS3/CD81/CACNB3/PPP1R13B/SORBS1/RAB11FIP2/E2F1/STX4/SSH1/BBC3/EGFR/FYN/ANK3/CLIP3/STOM/SPTBN1/TCAF1/TCAF2/ATP2B4/NKD2/MTCL1/AGR2/CDK5R1/PRKCE/C2CD5/CEMIP	44
	BP	GO:0032330	regulation of chondrocyte differentiation	23/3670	52/18866	4.00801e-05	0.00263933	0.00221552	BMP4/AXIN2/EFEMP1/TGFBR1/FGF18/SMAD7/SMAD3/BMPR1B/RFLNA/GLG1/SCIN/GLI2/GLI3/LTBP3/CCN2/PKDCC/RUNX2/RARB/TRPS1/SOX6/WNT9A/ADAMTS7/MDK	23
	BP	GO:0051496	positive regulation of stress fiber assembly	23/3670	52/18866	4.00801e-05	0.00263933	0.00221552	LPAR1/S100A10/LIMCH1/PPM1F/RAC1/ARHGEF5/TGFBR1/NRP1/TGFB3/SMAD3/ABL1/ARHGEF10L/WNT4/CCDC88A/RHOC/MTOR/CCN2/EPHA1/SH3PXD2B/TPM1/FHOD1/EVL/SERPINF2	23
	BP	GO:0030098	lymphocyte differentiation	103/3670	368/18866	4.07622e-05	0.00265171	0.00222591	FZD8/SLAMF8/TMEM131L/FZD5/BMP4/GAS6/HLA-G/ZMIZ1/RORC/DTX1/IL18R1/CD74/RORA/CDH17/VAV1/EGR1/MYB/SEMA4A/PTGER4/MR1/FZD7/CD27/XBP1/DOCK11/KAT2A/CYLD/SMAD7/ZEB1/CDK6/ERBB2/CEBPG/EGR3/HHEX/PIK3R1/TNFSF4/GATA3/ABL1/BCL6/IL18/SYK/DLL1/RASGRP1/IL23A/IL7/CTSL/ID2/ZBTB7B/ZBTB1/LRRC8A/FLT3LG/WNT4/CAMK4/MALT1/NFKBID/RUNX1/ITPKB/NFKBIZ/NRARP/PSAP/GLI2/INHA/ZC3H12A/MTOR/JAG2/SHH/GLI3/VSIR/ATM/HDAC4/BTN2A2/PRDM…	103
	BP	GO:0007160	cell-matrix adhesion	70/3670	230/18866	4.14227e-05	0.00265171	0.00222591	SGCE/S100A10/FBLN5/LIMCH1/MSLN/ADAM15/ITGA3/PPM1F/LRP1/RAC1/THBS1/CIB1/DISC1/CSF1/ITGB2/EMILIN1/DLC1/ITGB4/CCL28/ACTN1/SNED1/EPDR1/JUP/RHOD/FERMT3/NRP1/CDK6/ITGB7/SMAD3/ITGB6/ONECUT2/FERMT2/PIK3R1/ABL1/BCL6/TMEM8B/COL16A1/WNT4/JAM3/SORBS1/PIK3CB/LYPD3/BCAM/UTRN/ITGA1/NINJ1/MUC4/CCN2/EPHA1/PLEKHA2/NPNT/PEAK1/BST1/PKD1/JAG1/SEMA3E/VEGFA/ADAMTS9/LDB1/PTPRJ/ITGB3/MMP14/HPSE/AJUBA/MACF1/NID2/ITGA6/WDP…	70
	BP	GO:0097191	extrinsic apoptotic signaling pathway	70/3670	230/18866	4.14227e-05	0.00265171	0.00222591	SRPX/TGFB2/WWOX/BMP4/THBS1/CIB1/KRT8/UNC5B/KRT18/TIMP3/TGFBR1/CD27/IL6R/CYLD/TNFSF12/NRP1/ZMYND11/SMAD3/TLR3/BCL2L14/PIK3R1/BMPR1B/HYAL2/AKT1/DAB2IP/TMBIM1/ITPRIP/MOAP1/LGALS3/BCL2L2/BCL2L1/IL7/LCN2/BCL10/GCLM/AGT/ERBB3/TNFRSF1B/ARHGEF2/ACVR1/PEA15/TNFRSF10B/TCF7L2/STX4/ITM2C/PYCARD/TGFB1/IFI27/FGFR1/FYN/MAPK7/DEPTOR/FAIM/SGPP1/TRPS1/HMOX1/TNFAIP3/SIVA1/BRCA1/ICAM1/PELI3/SKIL/MKNK2/TNFRSF12A/TMC8…	70
	BP	GO:0002791	regulation of peptide secretion	106/3670	381/18866	4.1529e-05	0.00265171	0.00222591	ADCY5/HIF1A/TGFB2/KCNS3/SCAMP5/TLR5/LRP1/RAC1/ARL2BP/MYRIP/EZR/GOLPH3/ITPR1/CD74/ADORA1/SRI/BAIAP3/CD14/ICA1/OXCT1/PTGER4/TLR2/HLA-DRB1/IDH2/LYN/XBP1/AACS/ITPR2/JAGN1/TGFB3/TLR4/LRP5/TNFSF4/UNC13B/P3H1/TLR6/RHBDF1/SYK/MCU/NR1D1/GLUL/RAB8B/MYH10/ARNTL/FRMD4A/MYO18A/LGR4/ATP13A2/RAB11FIP3/ISL1/ACHE/PPIA/BRSK2/GAPDH/CCN3/SLC12A2/SLC2A1/TCF7L2/HMGN3/ACSL4/PAX8/F2R/FKBP1B/GIPR/UQCC2/STX4/RAB11FIP5/ADO…	106
	BP	GO:0002718	regulation of cytokine production involved in immune response	32/3670	83/18866	4.16285e-05	0.00265171	0.00222591	TGFB2/FZD5/HLA-G/IL18R1/CD74/IL1R1/SMAD7/TGFB3/TLR3/TLR4/TNFSF4/GATA3/BCL6/IL18/TRIL/CD81/MALT1/BCL10/TNFRSF1B/HLA-E/SCIMP/TGFB1/TRIM6/B2M/HMOX1/BST2/RSAD2/MAVS/CD160/GPRC5B/JAK3/FOXP3	32
	BP	GO:0071230	cellular response to amino acid stimulus	28/3670	69/18866	4.21256e-05	0.00266595	0.00223787	COL6A1/PDGFC/PDGFD/SH3BP4/KLHL22/XBP1/ZEB1/COL1A1/BCL2L2/BCL2L1/COL16A1/BCL11A/SESN3/GCLM/COL5A2/CASTOR3/CASTOR1/MTOR/DNMT1/CPEB4/CYBA/EGFR/NTRK2/FYN/RRAGD/CPEB3/CEBPB/COL4A1	28
	BP	GO:0071229	cellular response to acid chemical	30/3670	76/18866	4.25318e-05	0.00267429	0.00224487	COL6A1/PDGFC/PDGFD/SH3BP4/KLHL22/XBP1/ZEB1/PKD2/COL1A1/BCL2L2/BCL2L1/COL16A1/BCL11A/SESN3/GCLM/COL5A2/CASTOR3/CASTOR1/MTOR/DNMT1/CPEB4/CYBA/EGFR/NTRK2/FYN/RRAGD/VEGFA/CPEB3/CEBPB/COL4A1	30
	BP	GO:0001667	ameboidal-type cell migration	129/3670	481/18866	4.30511e-05	0.00268959	0.00225771	SEMA4B/NR2F2/TACSTD2/HIF1A/TGFB2/MET/PTPRM/ADGRA2/BMP4/VIL1/ITGA3/PPM1F/PPARG/VASH1/THBS1/KANK2/S100P/CIB1/FGFBP1/PLPP3/PTPRG/ITGB2/EPHA2/ARSB/SEMA4D/PRR5L/TGFBR1/MAPRE2/FGF18/S100A2/SEMA4A/DNAJA4/PRSS3/JUP/MAP3K3/GNA12/SEMA3F/RAB25/TNFSF12/ANXA6/LGMN/NRP1/WASF2/LPXN/SRPX2/ITGB7/ROBO1/EGR3/LRP5/SPRED1/CYP1B1/SEMA4G/HYAL2/GATA3/ABL1/AKT1/DAB2IP/PLXND1/IQSEC1/PRKD1/GLUL/PRCP/PROX1/SERPINF1/SASH1/CT…	129
	BP	GO:0045778	positive regulation of ossification	35/3670	94/18866	4.39352e-05	0.00271344	0.00227773	TGFB2/BMP4/ADRB2/FAM20C/TFAP2A/CCN1/OSR1/CLIC1/IL6R/LRP3/TGFB3/SMAD3/LRP5/BMPR1B/ZHX3/PRKD1/IL6ST/TOB2/WNT4/SMAD1/ACVR1/GLI3/TGFB1/ISG15/FBXO5/CEBPD/CTNNBIP1/NPNT/PKDCC/JAG1/RUNX2/CEBPB/BMPR2/IFITM1/ADGRV1	35
	BP	GO:0007272	ensheathment of neurons	47/3670	139/18866	4.42681e-05	0.00271344	0.00227773	EIF2B2/LPAR1/DEGS1/PMP22/KLK6/TNFRSF21/GPC1/CTSC/PLLP/TLR2/XK/MYO5A/SIRT2/EGR2/ERBB2/FA2H/AKT1/MAL2/NSUN5/QKI/ZPR1/CD9/JAM3/ATRN/B4GALT6/MBP/TNFRSF1B/PSAP/SKI/MTOR/B4GALT5/CXCR4/EIF2AK3/MALL/NTRK2/RARB/TPPP/CMTM8/NDRG1/ACER3/ABCD1/WASF3/DICER1/PRX/ABCA2/PIKFYVE/ADGRG6	47
	BP	GO:0008366	axon ensheathment	47/3670	139/18866	4.42681e-05	0.00271344	0.00227773	EIF2B2/LPAR1/DEGS1/PMP22/KLK6/TNFRSF21/GPC1/CTSC/PLLP/TLR2/XK/MYO5A/SIRT2/EGR2/ERBB2/FA2H/AKT1/MAL2/NSUN5/QKI/ZPR1/CD9/JAM3/ATRN/B4GALT6/MBP/TNFRSF1B/PSAP/SKI/MTOR/B4GALT5/CXCR4/EIF2AK3/MALL/NTRK2/RARB/TPPP/CMTM8/NDRG1/ACER3/ABCD1/WASF3/DICER1/PRX/ABCA2/PIKFYVE/ADGRG6	47
	BP	GO:0072006	nephron development	48/3670	143/18866	4.56151e-05	0.00277853	0.00233237	PGF/TACSTD2/COL4A4/KIF26B/PTCH1/BMP4/PDGFD/ITGA3/SMAD4/PODXL/GREB1L/COL4A3/EGR1/NUP85/PBX1/OSR1/KLF15/IL6R/WNK4/FAT4/MTSS1/PKD2/GATA3/DLL1/WNT4/AGT/PROM1/LGR4/PAX8/DCHS1/GZF1/SHH/GLI3/NOTCH1/WNT2B/MYO1E/CTNNBIP1/NPNT/BASP1/NOTCH3/LIF/PKD1/JAG1/VEGFA/NOTCH2/ACTA2/SMO/FGF2	48
	BP	GO:0033673	negative regulation of kinase activity	79/3670	268/18866	4.76074e-05	0.00288187	0.00241912	EPHB2/GPRC5A/NR2F2/SFN/BMP4/PPM1F/CAMK2N1/TRIB2/CDK5RAP3/CIB1/HEG1/PRKAR2B/PTPRH/LYN/SH2B3/SNCA/VPS25/DUSP1/CBLC/LRP5/SPRED1/HHEX/HYAL2/ABL1/AKT1/DAB2IP/CDKN2C/ITPRIP/KAT2B/RGS3/DBNDD2/GNAQ/PTK6/ADARB1/HEXIM2/AGT/PRDX3/GADD45B/TARBP2/CSK/INKA2/SPRY1/ERRFI1/PTPRB/SMPD1/PDCD4/MBIP/DUSP16/ADORA2A/PYCARD/SPRY2/HMGCR/EPHA1/SORL1/DEPTOR/MAPK8IP1/TESC/MAPT/MLLT1/SOCS3/LATS1/WASHC1/TNFAIP3/PKIG/DUSP10/PT…	79
	BP	GO:1903510	mucopolysaccharide metabolic process	40/3670	113/18866	5.00962e-05	0.00301381	0.00252987	CHST11/CHST15/B3GNT3/ST3GAL1/ST3GAL4/ARSB/CSGALNACT1/NDST1/DSE/UST/CSGALNACT2/VCAN/ST3GAL3/HYAL2/AKT1/NFKB1/CHSY1/GALNS/CHST14/B4GALT6/NDST2/ST3GAL6/TGFB1/ST3GAL2/B4GALT5/CSPG4/CHST12/ITIH2/CHPF/XYLT1/B3GNT7/DSEL/CHST7/B4GALT1/ITIH4/HYAL3/HMMR/SPOCK2/FGF2/CEMIP	40
	BP	GO:0046849	bone remodeling	34/3670	91/18866	5.17436e-05	0.0030883	0.0025924	MITF/ADRB2/RAC1/CTSK/EPHA2/TMEM64/RAC2/CA2/TGFB3/LRP5/SYK/IL7/DEF8/RASSF2/LGR4/NCDN/CSK/EFNA2/LTBP3/TGFB1/EGFR/INPP5D/TNFRSF11B/TNFAIP3/NOTCH2/ITGB3/LEPR/TNFRSF11A/LRP6/LRRK1/PPARGC1B/MDK/GJA1/ADAM8	34
	BP	GO:0060840	artery development	37/3670	102/18866	5.1968e-05	0.0030883	0.0025924	PRICKLE1/TGFB2/BMP4/ZMIZ1/ENG/LRP1/TGFBR1/NDST1/FOXH1/LUZP1/SMAD7/NRP1/AP2B1/SUFU/ROBO1/PKD2/PLXND1/STRA6/LTBP1/MYH10/PROX1/LOXL1/FOLR1/SHH/GLI3/NOTCH1/PRDM1/NOTCH3/JAG1/VEGFA/ADAMTS9/MYLK/HECTD1/NKX3-1/BMPR2/ADAMTS6/MDK	37
	BP	GO:0051552	flavone metabolic process	6/3670	6/18866	5.40116e-05	0.00318973	0.00267755	PPARGC1A/UGT1A8/UGT1A9/UGT1A7/UGT1A10/UGT1A1	6
	BP	GO:0032886	regulation of microtubule-based process	72/3670	240/18866	5.44279e-05	0.00318973	0.00267755	MET/RAC1/CIB1/MAPRE2/MAP1A/KAT2A/CYLD/SNCA/ATAT1/ERBB2/CHMP4C/MID1/FKBP4/DNAH11/ABL1/KAT2B/POC1A/DIXDC1/MID1IP1/TRIM36/TPX2/BBS2/MARK2/CFAP20/HDGFL3/SKA3/ARHGEF2/MECP2/MKKS/CHMP2B/PHLDB1/MAPK15/NIN/BICD2/PLK2/TOGARAM2/TOGARAM1/SPAG5/AURKA/KATNB1/DYRK1A/PKD1/SLAIN2/MAP2/MAPT/CHEK1/DYNC1H1/NEK2/STMN3/CEP97/CLIP3/PKHD1/BRCA1/TPPP/CCP110/TTBK2/AKAP9/CEP295NL/ALMS1/HAP1/MACF1/MAP1B/CNIH2/GNAI1/CCDC40/…	72
	BP	GO:0032528	microvillus organization	14/3670	25/18866	5.46579e-05	0.00318973	0.00267755	RAP1GAP/VIL1/PODXL/EZR/CDHR5/CDHR2/MYO1A/ESPN/FSCN1/RAP2A/RAPGEF6/PLD1/RAPGEF2/RDX	14
	BP	GO:0030099	myeloid cell differentiation	117/3670	431/18866	5.49841e-05	0.00318973	0.00267755	MITF/HIF1A/BMP4/RASGRP4/MEIS2/PPARG/FAM20C/THBS1/CDK5RAP3/CIB1/CSF1/EPHA2/CD74/ANXA2/TMEM64/EIF2AK1/ACTN1/JUNB/ZFP36/ZBTB46/MEIS1/H3-3B/ZNF385A/SH3PXD2A/TLR2/HLA-DRB1/HCLS1/CA2/LYN/SH2B3/KLF13/JAGN1/CDK6/WASF2/CEBPG/TLR3/TLR4/FBN1/PIK3R1/IFI16/HIPK2/GATA3/DYRK3/BCL6/KAT2B/DLL1/LGALS3/IL23A/CD101/TRIM10/CD81/ID2/TOB2/APP/RASSF2/H3-3A/PRMT6/CAMK4/NME2/PRDX3/RUNX1/TGFBR3/PIP4K2A/SRP54/ITPKB/SCIN/LEO…	117
	BP	GO:0030033	microvillus assembly	11/3670	17/18866	5.72678e-05	0.00330256	0.00277225	RAP1GAP/PODXL/EZR/MYO1A/ESPN/FSCN1/RAP2A/RAPGEF6/PLD1/RAPGEF2/RDX	11
	BP	GO:1905314	semi-lunar valve development	18/3670	37/18866	5.91423e-05	0.00338562	0.00284198	TGFB2/BMP4/EMILIN1/GATA4/ROBO1/GATA3/STRA6/TNFRSF1B/SLIT2/TGFB1/NOTCH1/JAG1/EFNA1/NOTCH2/SNAI1/BMPR2/RB1/ROCK1	18
	BP	GO:0072009	nephron epithelium development	39/3670	110/18866	5.9403e-05	0.00338562	0.00284198	PGF/TACSTD2/KIF26B/PTCH1/BMP4/SMAD4/PODXL/GREB1L/PBX1/OSR1/KLF15/WNK4/FAT4/MTSS1/PKD2/GATA3/DLL1/WNT4/AGT/PROM1/LGR4/PAX8/DCHS1/GZF1/SHH/GLI3/NOTCH1/WNT2B/MYO1E/CTNNBIP1/NPNT/BASP1/LIF/PKD1/JAG1/VEGFA/NOTCH2/SMO/FGF2	39
	BP	GO:0048017	inositol lipid-mediated signaling	61/3670	196/18866	6.15837e-05	0.00347174	0.00291427	TGFB2/PPP1R16B/PDGFC/PDGFD/CAT/UNC5B/PTAFR/EZR/PTPN13/HCST/SEMA4D/PLCD3/PRR5L/PLCB4/ROR1/HCLS1/LYN/SIRT2/ERBB2/PIK3R1/GPR143/GATA3/AKT1/DAB2IP/IL18/RASGRP1/PLXNB1/NLRC3/DIPK2A/PIP5K1B/AGT/PIP4K2A/ERBB3/PIK3CB/NCS1/F2R/NOP53/EGFR/FGFR1/BTN2A2/PLCB2/NTRK2/SERPINE2/PI4KA/FYN/PLCH1/PIK3CD/EPOR/CEP55/FBXL2/PLCL2/NKX3-1/PLD1/PLCH2/CD160/IER3/LIME1/EDN1/IRS2/GAB1/PLEKHA1	61
	BP	GO:0048015	phosphatidylinositol-mediated signaling	60/3670	192/18866	6.18299e-05	0.00347174	0.00291427	TGFB2/PPP1R16B/PDGFC/PDGFD/CAT/UNC5B/PTAFR/EZR/PTPN13/HCST/SEMA4D/PLCD3/PRR5L/PLCB4/ROR1/HCLS1/LYN/SIRT2/ERBB2/PIK3R1/GPR143/GATA3/AKT1/DAB2IP/IL18/RASGRP1/PLXNB1/NLRC3/DIPK2A/PIP5K1B/AGT/PIP4K2A/ERBB3/PIK3CB/NCS1/F2R/NOP53/EGFR/FGFR1/BTN2A2/PLCB2/NTRK2/SERPINE2/PI4KA/FYN/PLCH1/PIK3CD/EPOR/CEP55/FBXL2/PLCL2/NKX3-1/PLCH2/CD160/IER3/LIME1/EDN1/IRS2/GAB1/PLEKHA1	60
	BP	GO:0031345	negative regulation of cell projection organization	59/3670	188/18866	6.19826e-05	0.00347174	0.00291427	EPHB2/SEMA4B/NR2F1/LPAR1/TACSTD2/ARHGAP44/PTPRS/RAP1GAP/ITGA3/LRP1/KREMEN1/PMP22/CIB1/PTPRG/DKK1/SEMA4D/PRNP/DNM3/SEMA4A/EPHA4/WNT3/SEMA3F/NRP1/CAPZB/FKBP4/SEMA4G/TCHP/BCL11A/EVI5L/IFRD1/SLIT2/NGEF/SEMA3A/PLK2/ITM2C/SPRY2/FYN/SRGAP2C/B2M/SEMA3E/MAP2/EFNA1/LGALS1/CEP97/EVL/RAB29/CCP110/KIAA0319/TBX6/RAPGEF2/ID1/PPP3CA/PLXNB3/CDK5R1/PLXNA3/VIM/MINAR1/TRIM46/ARPIN	59
	BP	GO:0048251	elastic fiber assembly	8/3670	10/18866	6.28177e-05	0.00349841	0.00293666	FBLN5/EMILIN1/MYH11/MFAP4/TNXB/LTBP3/THSD4/EFEMP2	8
	BP	GO:0010718	positive regulation of epithelial to mesenchymal transition	22/3670	50/18866	6.46599e-05	0.00358054	0.0030056	TGFB2/BMP4/ENG/SMAD4/AXIN2/TGFBR1/TGFB3/SMAD3/COL1A1/SDCBP/ISL1/GLIPR2/ACVR1/DAB2/TCF7L2/MTOR/TGFB1/NOTCH1/JAG1/SNAI1/EZH2/MDK	22
	BP	GO:0071559	response to transforming growth factor beta	76/3670	258/18866	6.72226e-05	0.00370142	0.00310707	CHST11/PRDM16/VASN/TGFB2/WWOX/HTRA1/ZMIZ1/PDGFD/ITGA3/ENG/SMAD4/FGFR2/THBS1/EMILIN1/PPARGC1A/CGN/TGFBR1/VEPH1/LTBP4/PEG10/FOXH1/LTBP2/SMAD7/ZEB1/LPXN/TGFB3/SMAD3/FBN1/ONECUT2/SPRED1/FERMT2/HYAL2/HIPK2/COL1A1/LTBP1/SDCBP/PDE3A/WNT4/SMAD1/TGFBR3/GLG1/SPRY1/ACVR1/CLDN1/DAB2/FNTA/SKI/FOLR1/PPM1A/LTBP3/TGFB1/SPRY2/ZFYVE9/CLEC3B/NPNT/FYN/MAPK7/HSP90AB1/CD109/TWSG1/LEMD3/CITED2/EID2/CDKN1C/SKIL/EP300/AR…	76
	BP	GO:0045926	negative regulation of growth	75/3670	254/18866	6.86692e-05	0.00375983	0.0031561	SEMA4B/HIF1A/TGFB2/WWC3/PTCH1/ADAM15/PTPRS/BMP4/ADRB2/SMAD4/CAPRIN2/PPARG/SH3BP4/SEMA4D/MEIS1/SEMA4A/CDHR2/TMPRSS4/WNT3/SEMA3F/MAPK11/LGMN/NRP1/SMAD3/TLL2/SEMA4G/HYAL2/CDKN2C/BCL6/TCHP/SAV1/PPT1/SMARCA2/PTK6/BCL11A/IP6K2/BBS2/DCBLD2/AGT/IFRD1/APBB2/STC2/SLIT2/CCN3/CXADR/SEMA3A/PHB/TGFB1/RAI1/SERTAD2/ESR2/NOTCH1/FBP1/SERPINE2/OSGIN1/EAF2/CDA/SEMA3E/MAP2/NOTCH2/DUSP10/PTPRJ/BST2/WWC2/BMPR2/KIAA0319…	75
	BP	GO:0051348	negative regulation of transferase activity	85/3670	296/18866	7.038e-05	0.00381696	0.00320406	EPHB2/GPRC5A/NR2F2/SFN/BMP4/PPM1F/CAMK2N1/TRIB2/PPARG/CDK5RAP3/CIB1/HEG1/ZFP36/PRKAR2B/PTPRH/LYN/SMAD7/SH2B3/SNCA/VPS25/DUSP1/CBLC/LRP5/SPRED1/HHEX/HYAL2/EIF4A2/ABL1/AKT1/DAB2IP/CDKN2C/ITPRIP/KAT2B/RGS3/DBNDD2/GNAQ/PTK6/ADARB1/HEXIM2/AGT/PRDX3/GADD45B/TARBP2/CSK/INKA2/SPRY1/ERRFI1/PTPRB/SMPD1/PINX1/PDCD4/MBIP/DUSP16/ADORA2A/PYCARD/SPRY2/HMGCR/EPHA1/FBXO5/SORL1/DEPTOR/MAPK8IP1/TESC/MAPT/MLLT1/SOCS…	85
	BP	GO:0060271	cilium assembly	104/3670	377/18866	7.04959e-05	0.00381696	0.00320406	IFT43/SEPTIN6/DZIP1L/CELSR3/DYNC2H1/DISC1/CPLANE2/RILPL2/UNC119B/GALNT11/PRKAR2B/CFAP221/RSPH1/MKS1/ABLIM3/CYLD/TXNDC15/ATAT1/PRKACA/ONECUT2/KIAA0586/TCHP/POC1A/PIBF1/TRIP11/ABCC4/TMEM231/B9D1/NEK1/KIFAP3/EVI5L/CELSR2/RPGRIP1L/CCDC88A/BBS2/SPAG16/CC2D2A/ARL3/ATMIN/CFAP20/TTC39C/DYNLRB1/DNAL1/BBS5/DNAAF2/IFT52/MKKS/ABLIM1/MAPK15/OFD1/ARL13B/CFAP44/TOGARAM1/SYNE2/UBXN10/SPATA6/NOTCH1/RAB23/EHD2/FLN…	104
	BP	GO:0006469	negative regulation of protein kinase activity	73/3670	246/18866	7.15189e-05	0.00385096	0.0032326	EPHB2/GPRC5A/NR2F2/SFN/BMP4/PPM1F/CAMK2N1/TRIB2/CDK5RAP3/CIB1/HEG1/PRKAR2B/PTPRH/LYN/SH2B3/SNCA/VPS25/DUSP1/CBLC/LRP5/SPRED1/HHEX/HYAL2/ABL1/AKT1/DAB2IP/CDKN2C/ITPRIP/KAT2B/RGS3/DBNDD2/GNAQ/PTK6/ADARB1/HEXIM2/AGT/GADD45B/TARBP2/INKA2/SPRY1/ERRFI1/PTPRB/SMPD1/PDCD4/MBIP/DUSP16/ADORA2A/PYCARD/SPRY2/HMGCR/EPHA1/SORL1/DEPTOR/MAPK8IP1/TESC/MLLT1/SOCS3/LATS1/TNFAIP3/PKIG/DUSP10/PTPRJ/CDKN1C/SH3BP5/LRP6…	73
	BP	GO:0061005	cell differentiation involved in kidney development	24/3670	57/18866	7.25659e-05	0.00388586	0.0032619	PTCH1/BMP4/PODXL/OSR1/KLF15/FAT4/MTSS1/GATA3/WNT4/PROM1/LGR4/PAX8/SHH/GLI3/NOTCH1/MYO1E/AMER1/BASP1/LIF/JAG1/GLIS2/NOTCH2/ACTA2/SMO	24
	BP	GO:0048736	appendage development	57/3670	181/18866	7.35529e-05	0.00389591	0.00327033	NR2F2/CHST11/TGFB2/PTCH1/FRAS1/BMP4/ALDH1A2/SMAD4/FGFR2/KREMEN1/TFAP2A/DYNC2H1/TBX3/ITGB4/DKK1/ZNRF3/PBX1/OSR1/GNA12/MKS1/WNT3/KAT2A/LRP5/BMPR1B/ECE1/KAT2B/TMEM231/B9D1/MAP3K20/RPGRIP1L/IFT52/MEGF8/GLI2/SKI/MBNL1/SHH/GLI3/NOTCH1/FGFR1/PITX1/SMOC1/PKDCC/FREM2/RUNX2/RARB/FGF9/NOTCH2/BMPR2/PAM/LRP6/ITGA6/PCSK5/WNT9A/WDPCP/FZD6/CYP26B1/ATRX	57
	BP	GO:0060173	limb development	57/3670	181/18866	7.35529e-05	0.00389591	0.00327033	NR2F2/CHST11/TGFB2/PTCH1/FRAS1/BMP4/ALDH1A2/SMAD4/FGFR2/KREMEN1/TFAP2A/DYNC2H1/TBX3/ITGB4/DKK1/ZNRF3/PBX1/OSR1/GNA12/MKS1/WNT3/KAT2A/LRP5/BMPR1B/ECE1/KAT2B/TMEM231/B9D1/MAP3K20/RPGRIP1L/IFT52/MEGF8/GLI2/SKI/MBNL1/SHH/GLI3/NOTCH1/FGFR1/PITX1/SMOC1/PKDCC/FREM2/RUNX2/RARB/FGF9/NOTCH2/BMPR2/PAM/LRP6/ITGA6/PCSK5/WNT9A/WDPCP/FZD6/CYP26B1/ATRX	57
	BP	GO:0009410	response to xenobiotic stimulus	44/3670	130/18866	7.43308e-05	0.00391583	0.00328705	CYP2W1/CYP2S1/ACSL1/RORC/PTGS1/CYB5R3/RORA/ALDH3A1/EPHX1/ACY1/SULT1A2/AOC1/CYP1B1/UGT1A8/UGT1A9/UGT1A3/UGT1A7/UGT1A5/AADAC/UGT1A4/UGT1A10/UGT1A1/UGT1A6/GSTA1/AKR7A2/E2F1/CYP2D7/SULT1A1/ARNT2/CRYZ/ARNT/CYP2U1/CYP2E1/HSP90AB1/GSTM3/PTGES3/GSTM4/CYP3A5/CYP2R1/RB1/NQO1/HNF4A/ACSM1/CYP26B1	44
	BP	GO:0060070	canonical Wnt signaling pathway	95/3670	339/18866	7.56185e-05	0.00395043	0.00331609	TLE4/PTPRU/MITF/FZD1/FZD8/PRICKLE1/TMEM131L/ADGRA2/FZD5/IGFBP4/CAPRIN2/FGFR2/KREMEN1/AXIN2/DISC1/PLPP3/TMEM64/DKK1/EGR1/ZNRF3/JUP/AMFR/FZD4/FZD7/MKS1/WNT3/CYLD/TLE1/SMAD3/CCDC88C/DDIT3/LRP5/FAM53B/CDK14/WNK2/TLE2/COL1A1/GATA3/PSMC5/SOX7/DAB2IP/PSMC4/PSMD3/NFKB1/GNAQ/DIXDC1/ARNTL/WNT4/PSMD13/RAPGEF1/TBX18/CDH3/PSMB8/LGR4/ISL1/LIMD1/GID8/FZD2/NRARP/LGR6/DAB2/TCF7L2/FOLR1/TLE6/SHH/GLI3/PPM1A/TGFB1/Z…	95
	BP	GO:0097503	sialylation	12/3670	20/18866	7.57983e-05	0.00395043	0.00331609	ST3GAL5/ST8SIA4/ST3GAL1/ST3GAL4/ST6GALNAC6/ST6GAL1/ST3GAL3/ST6GALNAC2/ST6GALNAC1/ST6GALNAC4/ST3GAL6/ST3GAL2	12
	BP	GO:0042982	amyloid precursor protein metabolic process	28/3670	71/18866	7.71688e-05	0.00400046	0.0033581	TMED10/SOAT1/BACE2/KLK6/PRNP/LDLRAP1/EPHA4/LYN/GGA3/APP/ACHE/BACE1/ITM2C/BIN1/NTRK2/SORL1/UNC13A/DYRK1A/GSAP/EFNA1/ITM2B/HAP1/SLC2A13/AGO2/TMCC2/EFNA3/ROCK1/ABCA2	28
	BP	GO:0007162	negative regulation of cell adhesion	86/3670	301/18866	7.78143e-05	0.00400298	0.00336021	EPCAM/TACSTD2/TMEM131L/ADAM15/IL1RN/CDSN/AKNA/BMP4/HLA-G/PLXNC1/PPM1F/LRP1/DTX1/PODXL/CLDN7/THBS1/DLC1/TNFRSF21/CD74/CCL28/SEMA4D/PRNP/SPINT2/FZD4/FZD7/HLA-DRB1/SMAD7/SH2B3/LPXN/ERBB2/DUSP1/PIK3R1/CYP1B1/TNFSF4/COL1A1/ABL1/AKT1/PLXND1/BCL6/LGALS3/PLXNB1/SWAP70/PDE5A/ZBTB7B/CD9/JAM3/NFKBID/RUNX1/MBP/ERBB3/NRARP/NOTCH4/FBLN1/ZC3H12A/ADORA2A/SHH/GLI3/VSIR/TGFB1/ABAT/NOTCH1/BTN2A2/SERPINE2/IL20RB/MAP…	86
	BP	GO:0010631	epithelial cell migration	101/3670	365/18866	7.82227e-05	0.00400298	0.00336021	NR2F2/TACSTD2/HIF1A/TGFB2/MET/PTPRM/ADGRA2/BMP4/VIL1/ITGA3/PPM1F/PPARG/VASH1/THBS1/KANK2/S100P/CIB1/FGFBP1/PLPP3/PTPRG/ITGB2/EPHA2/ARSB/TGFBR1/MAPRE2/FGF18/S100A2/SEMA4A/DNAJA4/PRSS3/JUP/MAP3K3/RAB25/TNFSF12/LGMN/NRP1/LPXN/SRPX2/ROBO1/EGR3/SPRED1/CYP1B1/GATA3/ABL1/AKT1/DAB2IP/PLXND1/IQSEC1/PRKD1/GLUL/PRCP/PROX1/SERPINF1/SASH1/CTSH/AGT/ANLN/GLIPR2/EPB41L4B/MECP2/SLIT2/CCN3/STARD13/ZC3H12A/MTOR/SEM…	101
	BP	GO:0006023	aminoglycan biosynthetic process	40/3670	115/18866	7.84496e-05	0.00400298	0.00336021	CHST11/HS6ST1/CHST15/B3GNT3/ST3GAL1/B3GNT9/ST3GAL4/CSGALNACT1/GPC1/HS3ST3B1/SDC3/NDST1/DSE/UST/CSGALNACT2/VCAN/GPC4/ST3GAL3/EXT1/NFKB1/CHSY1/CHST14/B4GALT6/NDST2/ST3GAL6/TGFB1/ST3GAL2/B4GALT5/CSPG4/HS3ST1/CHST12/B3GALNT1/CHPF/XYLT1/B3GNT7/DSEL/CHST7/B4GALT1/SDC2/CEMIP	40
	BP	GO:0002573	myeloid leukocyte differentiation	64/3670	210/18866	8.26292e-05	0.00417256	0.00350256	MITF/BMP4/PPARG/FAM20C/CSF1/EPHA2/CD74/ANXA2/TMEM64/EIF2AK1/JUNB/ZBTB46/SH3PXD2A/TLR2/HLA-DRB1/HCLS1/CA2/LYN/JAGN1/CDK6/TLR3/TLR4/FBN1/PIK3R1/IFI16/GATA3/IL23A/CD101/CD81/ID2/TOB2/APP/RASSF2/CAMK4/NME2/RUNX1/SRP54/NME1/EFNA2/INHA/MTOR/TGFB1/IRF7/CTNNBIP1/INPP5D/PIK3CD/TESC/LIF/CD109/VEGFA/NOTCH2/CEBPB/PIR/TNFRSF11A/TMEM178A/RB1/ZFPM1/LRRK1/BATF2/PPARGC1B/OSCAR/JUN/KLF10/UBD	64
	BP	GO:0045216	cell-cell junction organization	64/3670	210/18866	8.26292e-05	0.00417256	0.00350256	CLDN4/CLDN2/PKP3/TGFB2/CLDN23/FZD5/PRKCH/DSP/CLDN7/HEG1/EPHA2/PERP/LSR/CDH17/TGFBR1/TLN1/RASSF8/JUP/NECTIN4/EPHA4/SMAD7/TGFB3/SMAD3/PRKACA/ESAM/CLDN9/DSG2/NECTIN3/PARD6B/NUMB/CD9/CDH24/JAM3/KIFC3/AGT/RUNX1/CDH3/CSK/GRHL1/CLDN1/RHOC/CXADR/F2R/DCHS1/TGFB1/NLGN2/PLEKHA7/CLDN3/CTNND1/FSCN1/GJD3/NUMBL/VEGFA/SNAI1/MPP7/ECT2/HIPK1/POF1B/PARD6G/PARD6A/ARVCF/RDX/ROCK1/GJA1	64
	BP	GO:0001701	in utero embryonic development	105/3670	383/18866	8.52014e-05	0.00428027	0.00359298	SLC34A2/NR2F2/CDX2/NXN/CHST11/KRT19/HS6ST1/HIF1A/GJB3/PTCH1/TENT5C/FZD5/ZMIZ1/SMAD4/FGFR2/VASH1/RXRA/KRT8/TBX3/CCN1/HEG1/PLCD3/TGFBR1/JUNB/ADCY9/SPINT2/SH3PXD2A/GNA12/KAT2A/ADM/SEC24D/TGFB3/RRP7A/SMAD3/PKD2/SMIM14/GATA3/AKT1/PSMC4/POLG2/TM4SF1/BCL2L1/MYH10/TMEM231/B9D1/ZPR1/HSD17B2/RPGRIP1L/NPM2/SPINT1/BCOR/PELO/WDTC1/ACVR1/TFEB/WDR74/EGLN1/GLI2/MFN2/JAG2/MBNL1/GLI3/CMIP/NOTCH1/EGFR/ARNT2/FGFR1/M…	105
	BP	GO:0016266	O-glycan processing	25/3670	61/18866	8.81e-05	0.004357	0.00365738	GCNT1/B3GNT3/ST3GAL1/MUC6/MUC5B/GALNT10/ST3GAL4/ST6GAL1/GALNT11/GALNT2/ST3GAL3/GCNT4/ST6GALNAC2/GALNT4/ST6GALNAC4/MUC13/ST3GAL2/MUC4/B4GALT5/GXYLT2/MUC3A/B3GNT7/GALNT7/GALNT9/MUC20	25
	BP	GO:0031100	animal organ regeneration	29/3670	75/18866	8.81384e-05	0.004357	0.00365738	PTPN3/PTPRU/PGF/PTCH1/GAS6/PPARG/LCP1/ADM/UGT1A1/FPGS/ATIC/TGFBR3/CLDN1/NNMT/RAP1A/GLI3/NOTCH1/EGFR/IGF2R/AURKA/WDR35/LPIN1/HMOX1/CEBPB/AXL/EZH2/PFKFB1/CDK1/TYMS	29
	BP	GO:0072088	nephron epithelium morphogenesis	29/3670	75/18866	8.81384e-05	0.004357	0.00365738	PGF/TACSTD2/KIF26B/PTCH1/BMP4/SMAD4/GREB1L/PBX1/OSR1/WNK4/FAT4/PKD2/GATA3/WNT4/AGT/LGR4/PAX8/DCHS1/GZF1/SHH/GLI3/WNT2B/CTNNBIP1/NPNT/LIF/PKD1/VEGFA/SMO/FGF2	29
	BP	GO:0006024	glycosaminoglycan biosynthetic process	38/3670	108/18866	8.85169e-05	0.004357	0.00365738	CHST11/HS6ST1/CHST15/B3GNT3/ST3GAL1/ST3GAL4/CSGALNACT1/GPC1/HS3ST3B1/SDC3/NDST1/DSE/UST/CSGALNACT2/VCAN/GPC4/ST3GAL3/EXT1/NFKB1/CHSY1/CHST14/B4GALT6/NDST2/ST3GAL6/TGFB1/ST3GAL2/B4GALT5/CSPG4/HS3ST1/CHST12/CHPF/XYLT1/B3GNT7/DSEL/CHST7/B4GALT1/SDC2/CEMIP	38
	BP	GO:1904377	positive regulation of protein localization to cell periphery	27/3670	68/18866	8.972e-05	0.00439403	0.00368846	EPHB2/VIL1/PRKCH/ITGA3/LRP1/CIB1/EZR/EPHA2/STAC/PRNP/CNPY4/PIK3R1/AKT1/LGALS3/SORBS1/RAB11FIP2/STX4/EGFR/EPB41/EPB41L2/CLIP3/SPTBN1/ATP2B4/NKD2/GNAI1/AGR2/PRKCE	27
	BP	GO:0045667	regulation of osteoblast differentiation	44/3670	131/18866	9.10949e-05	0.00443905	0.00372626	PTCH1/BMP4/FGFR2/FAM20C/AXIN2/CCN1/TMEM64/SEMA4D/CLIC1/IL6R/LRP3/CDK6/SUFU/SMAD3/PRKACA/LRP5/BMPR1B/ZHX3/PRKD1/IL6ST/ID2/RASSF2/WNT4/TOB1/SMAD1/LIMD1/ACVR1/SKI/GLI3/NOTCH1/HDAC4/FBXO5/CEBPD/SMOC1/CTNNBIP1/NPNT/REST/JAG1/TWSG1/RUNX2/CEBPB/BMPR2/IFITM1/ID1	44
	BP	GO:0043122	regulation of I-kappaB kinase/NF-kappaB signaling	74/3670	252/18866	9.28707e-05	0.00446747	0.00375011	LPAR1/APOL3/TGM2/TFG/PIM2/CASP1/CD74/RORA/ROR1/MAP3K3/HLA-DRB1/TLE1/CXXC5/ZMYND11/CARD9/TLR3/TLR4/ABL1/TLR6/AKT1/DAB2IP/NR1D1/BIRC3/TRAF3/PRKD1/NLRC3/TRAF4/TRIM8/SECTM1/MALT1/BCL10/TRIM32/NFKBID/TRIM62/USP10/TRIM22/RHOC/TNFRSF10B/F2R/ZC3H12A/TIFA/CARD8/PLK2/SLC20A1/PPM1A/PYCARD/CASP10/TRAF5/TRIM6/FLNA/TNIP1/NEK6/FYN/S100A4/LITAF/LGALS1/HMOX1/TNFAIP3/BST2/MIB2/MAVS/PELI2/ANKRD17/AJUBA/ECT2/ASH1L/M…	74
	BP	GO:0008589	regulation of smoothened signaling pathway	32/3670	86/18866	9.30532e-05	0.00446747	0.00375011	PTCH1/FGFR2/DYNC2H1/RORA/NDST1/MKS1/TXNDC15/SUFU/PRKACA/CHSY1/RPGRIP1L/PDCL/MEGF8/GLI2/SHH/GLI3/SERPINE2/PRKACB/RUNX2/FGF9/GLIS2/PTCH2/HERC4/RB1/DCDC2/SMO/GORAB/ARL6/TEDC2/WNT9A/GPR37L1/RAB34	32
	BP	GO:0035023	regulation of Rho protein signal transduction	32/3670	86/18866	9.30532e-05	0.00446747	0.00375011	LPAR1/MET/EPS8L3/ITGA3/RAC1/KANK2/ARHGEF28/HEG1/DLC1/ARHGEF3/NRP1/GPR35/ROBO1/ABL1/EPS8L1/BCL6/KCTD13/ADGRG1/EPS8L2/ARHGEF2/STARD13/F2R/OPHN1/ARHGAP42/EPS8/MYO9B/CCDC125/ARHGDIB/ARHGEF18/ARHGAP35/RASGRF2/ABL2	32
	BP	GO:0007435	salivary gland morphogenesis	17/3670	35/18866	9.70774e-05	0.00463783	0.00389312	TGFB2/FGFR2/TGM2/NRP1/TGFB3/PLXND1/NTN4/ESRP2/BTBD7/SEMA3A/SHH/TGFB1/EGFR/FGFR1/TWSG1/PAX6/NKX3-1	17
	BP	GO:0070373	negative regulation of ERK1 and ERK2 cascade	30/3670	79/18866	9.90261e-05	0.0046874	0.00393473	EPHB2/PSCA/NDRG2/CAMK2N1/SMAD4/EMILIN1/EZR/TIMP3/LYN/DUSP1/TLR4/TBC1D10C/SPRED1/WNK2/ABL1/DAB2IP/RAPGEF1/CSK/SPRY1/ERRFI1/FBLN1/PHB/SPRY2/BTN2A2/TNIP1/LIF/DUSP10/SPRY4/GBP1/SIRPA	30
	BP	GO:0007249	I-kappaB kinase/NF-kappaB signaling	82/3670	286/18866	9.90769e-05	0.0046874	0.00393473	LPAR1/APOL3/IRAK2/TGM2/TFG/PIM2/CASP1/CD74/TIAF1/CD14/RORA/ROR1/MAP3K3/TLR2/HLA-DRB1/TLE1/CXXC5/ZMYND11/CARD9/TLR3/TLR4/ABL1/TLR6/AKT1/DAB2IP/NR1D1/BIRC3/TRAF3/PRKD1/NLRC3/IRAK1BP1/TRAF4/TRIM8/SECTM1/MALT1/BCL10/TRIM32/NFKBID/TRIM62/USP10/TRIM22/RHOC/TNFRSF10B/F2R/ZC3H12A/TIFA/CARD8/PLK2/SLC20A1/PPM1A/PYCARD/CASP10/TRAF5/TRIM6/FLNA/TNIP1/NEK6/FYN/FAIM/S100A4/LITAF/LGALS1/HMOX1/TNFAIP3/ERC1/BST2/M…	82
	BP	GO:0051494	negative regulation of cytoskeleton organization	52/3670	163/18866	0.000102908	0.0048282	0.00405292	IQANK1/TACSTD2/VILL/MET/VIL1/SMAD4/CIB1/DLC1/CORO1A/KAT2A/SNCA/TMSB10/WASF2/CAPZB/MID1/FKBP4/KAT2B/TRIOBP/SWAP70/MID1IP1/FHOD3/TPX2/SHANK3/ESPN/HDGFL3/SCIN/CGNL1/ARHGEF2/SPTB/MKKS/SLIT2/TMOD2/SSH1/TMOD1/KATNB1/DYRK1A/MAP2/EPS8/NEK2/CLIP3/SPTBN1/CAPG/BRCA1/CCP110/TTBK2/ARHGEF18/MAP1B/KANK3/RDX/PFN4/ARPIN/CRACD	52
	BP	GO:0061035	regulation of cartilage development	28/3670	72/18866	0.000103044	0.0048282	0.00405292	BMP4/AXIN2/CTSK/CCN1/EFEMP1/TGFBR1/FGF18/KAT2A/SMAD7/SMAD3/BMPR1B/RFLNA/SMAD1/GLG1/SCIN/GLI2/GLI3/LTBP3/CCN2/PKDCC/RUNX2/RARB/TRPS1/BMPR2/SOX6/WNT9A/ADAMTS7/MDK	28
	BP	GO:0022612	gland morphogenesis	42/3670	124/18866	0.000105081	0.00490009	0.00411327	ETV5/TGFB2/PTCH1/BMP4/FGFR2/RXRA/TBX3/CSF1/TGM2/EPHA2/XBP1/NRP1/VDR/TGFB3/LRP5/PLXND1/NTN4/PROX1/MSN/WNT4/ESRP2/BTBD7/GLI2/SEMA3A/SHH/GLI3/TGFB1/NOTCH1/EGFR/CRIP1/FGFR1/PLAG1/SERPINB5/TWSG1/PAX6/TNFAIP3/NOTCH2/NKX3-1/CEBPB/LRP6/TNC/MDK	42
	BP	GO:0007389	pattern specification process	121/3670	455/18866	0.000108001	0.00501225	0.00420742	NR2F2/CDX2/PSKH1/HIF1A/PTCH1/DZIP1L/TSHZ1/FZD5/BMP4/ALDH1A2/ENG/SMAD4/MEIS2/FGFR2/AXIN2/DYNC2H1/C3/TBX3/BTG2/DKK1/GATA4/SMARCD3/TGFBR1/GALNT11/MEIS1/PBX1/FOXH1/OSR1/MKS1/WNT3/KAT2A/SEMA3F/ZEB1/NRP1/COBL/SIM2/EGR2/SUFU/SMAD3/PRKACA/DDIT3/ROBO1/LRP5/HHEX/MID1/BMPR1B/DNAH11/PKD2/HIPK2/AP1B1/PBX3/DLL1/CHSY1/ADGRG1/CELSR2/RPGRIP1L/GDF11/SMAD1/BCOR/TBX18/CC2D2A/ISL1/RNF207/SPRY1/BBS5/SSBP3/IFT52/NRARP/…	121
	BP	GO:0007517	muscle organ development	110/3670	407/18866	0.000109429	0.00502775	0.00422042	FZD1/NR2F2/SGCE/TGFB2/MYH14/BMP4/ENG/DSP/SMAD4/FGFR2/RXRA/FLNB/MRAS/HEG1/BTG2/GPC1/SRI/DKK1/TGFBR1/DMD/MEIS1/EGR1/FOXH1/XK/MYOM2/FZD7/XBP1/KAT2A/SMAD7/MAPK11/LAMA2/CFL2/SIRT2/EGR2/SMAD3/ZBTB18/EGR3/TLL2/DLL1/KLHL41/EEF2/UBE4B/STRA6/ETV1/ZBTB42/SAV1/SGCB/ARNTL/SAP30/PROX1/COL6A3/ADARB1/SELENON/TCF12/GPCPD1/ARID5B/TGFBR3/LUC7L/ISL1/ERBB3/FZD2/UTRN/EGLN1/CXADR/SKI/MTOR/NIBAN2/UQCC2/SHH/TGFB1/MEF2A/H…	110
	BP	GO:0034308	primary alcohol metabolic process	34/3670	94/18866	0.000109713	0.00502775	0.00422042	ALDH1A1/H6PD/ALDH1A2/SDR16C5/RETSAT/RDH11/AKR1C4/ALDH3B1/SULT1A2/CYP1B1/AKR1B10/DGAT1/GDPD3/WNT4/ALDH1B1/CHKA/AKR7A2/SULT1A1/GDE1/REST/ALDH2/ALDH1A3/DGAT2/CYP3A5/RDH16/ACSS1/AKR1B1/ADH1C/RDH5/GPD1/LRAT/ALDH3B2/LIPE/CLCN2	34
	BP	GO:0090132	epithelium migration	101/3670	368/18866	0.000109882	0.00502775	0.00422042	NR2F2/TACSTD2/HIF1A/TGFB2/MET/PTPRM/ADGRA2/BMP4/VIL1/ITGA3/PPM1F/PPARG/VASH1/THBS1/KANK2/S100P/CIB1/FGFBP1/PLPP3/PTPRG/ITGB2/EPHA2/ARSB/TGFBR1/MAPRE2/FGF18/S100A2/SEMA4A/DNAJA4/PRSS3/JUP/MAP3K3/RAB25/TNFSF12/LGMN/NRP1/LPXN/SRPX2/ROBO1/EGR3/SPRED1/CYP1B1/GATA3/ABL1/AKT1/DAB2IP/PLXND1/IQSEC1/PRKD1/GLUL/PRCP/PROX1/SERPINF1/SASH1/CTSH/AGT/ANLN/GLIPR2/EPB41L4B/MECP2/SLIT2/CCN3/STARD13/ZC3H12A/MTOR/SEM…	101
	BP	GO:0001101	response to acid chemical	44/3670	132/18866	0.000111221	0.00504166	0.0042321	COL6A1/PDGFC/GLRB/PDGFD/KRT8/SH3BP4/PPARGC1A/KLHL22/LYN/XBP1/ZEB1/PKD2/COL1A1/BCL2L2/BCL2L1/COL16A1/BCL11A/SESN3/CD9/GCLM/MTHFR/COL5A2/CASTOR3/CASTOR1/MTOR/DNMT1/CPEB4/CYBA/CCN2/EGFR/NTRK2/FYN/RRAGD/VEGFA/PEMT/CPEB3/CEBPB/ASNS/ICAM1/COL4A1/ATP2B4/AKR1B1/EDN1/PCK1	44
	BP	GO:0019751	polyol metabolic process	44/3670	132/18866	0.000111221	0.00504166	0.0042321	PLPP3/PTAFR/P2RY1/PLCD3/SPTLC3/PLCB4/PLA2G4A/SNCA/NTSR1/GCH1/PCBD1/SPR/IP6K2/GK/TPI1/PDXP/INPP5A/ITPKB/MECP2/SPTLC2/MYOF/IMPA2/SPTLC1/NUDT4/PLCB2/PLPP1/PLCH1/INPP5D/PLCG2/ASAH1/SGPP1/DGAT2/SYNJ1/CYP2R1/INPP4A/PLCH2/ACER3/AKR1B1/INPP4B/DYSF/PCK1/COQ3/ABCA2/FGF2	44
	BP	GO:1902905	positive regulation of supramolecular fiber organization	63/3670	208/18866	0.000113835	0.00513626	0.00431151	LPAR1/S100A10/LIMCH1/MET/BAIAP2L1/VIL1/PPM1F/RAC1/WASH6P/ARHGEF5/TGFBR1/CORO1A/SYNPO/CFL2/NRP1/WASF2/TGFB3/SMAD3/IQGAP2/ABL1/ARHGEF10L/FCHSD2/SWAP70/PROX1/APP/WNT4/CCDC88A/CDC42EP3/PDXP/SCIN/MECP2/RHOC/NIN/FCHSD1/MTOR/TOGARAM1/BIN1/PYCARD/CCN2/EPHA1/SH3PXD2B/FLNA/TPM1/KATNB1/FHOD1/SLAIN2/MAPT/WASHC1/EVL/ICAM1/SPIRE2/RB1/AKAP9/MAP1B/EDN1/WASF3/ID1/SERPINF2/CDK5R1/PRKCE/BAIAP2L2/ARPIN/CRACD	63
	BP	GO:0006835	dicarboxylic acid transport	35/3670	98/18866	0.000117452	0.00527504	0.00442801	SLC26A6/ADORA1/PRAF2/BDNF/SLC25A30/SYT1/NTSR1/RAB3A/UNC13B/SLC46A1/SLC25A10/LRRC8A/SLC26A9/STXBP1/SLC12A2/LRRC8E/FOLR1/ADORA2A/ABAT/VAMP2/NTRK2/SLC25A14/LRRC8C/SLC1A4/GLS2/SLC26A2/GLS/SLC26A1/SLC19A2/PER2/PPFIA3/STX1A/SLC25A21/GJA1/SLC19A1	35
	BP	GO:0034329	cell junction assembly	116/3670	434/18866	0.000118741	0.00530849	0.00445609	EPHB2/FZD1/EPHB3/LAMC2/CLDN4/CLDN2/S100A10/PKP3/LIMCH1/PTPRS/CLDN23/FZD5/PRKCH/CLSTN3/PPM1F/LRP1/RAC1/CLDN7/THBS1/VMP1/HEG1/DLC1/ITGB4/EPHA2/DKK1/ACTN1/SEMA4D/LAMB3/LSR/TLN1/DNM3/OXTR/SLITRK6/SEMA4A/BDNF/JUP/TLR2/RHOD/SMAD7/SNCA/GPC4/NRP1/NRCAM/SRPX2/SMAD3/PRKACA/CLSTN1/FERMT2/ESAM/ABL1/PLXND1/CLDN9/PARD6B/PLXNB1/COL16A1/LAMA3/APP/FLRT3/CD9/CDH24/WNT4/SHANK3/JAM3/RAPGEF1/ADGRL1/AGT/RUNX1/ITGA5/SO…	116
	BP	GO:0046328	regulation of JNK cascade	57/3670	184/18866	0.00012112	0.00539012	0.00452461	FZD8/FZD5/ERN2/TPD52L1/DKK1/ARHGEF5/FZD4/FZD7/EPHA4/CD27/CYLD/ZMYND11/CARD9/TLR3/TLR4/HIPK2/TLR6/AKT1/DAB2IP/SYK/FGD2/TRAF3/RASGRP1/SDCBP/TRAF4/APP/PHLPP1/SASH1/MAP3K20/RASSF2/RAPGEF1/GADD45B/MAP3K4/MDFIC/PDCD4/SEMA3A/PYCARD/CCN2/TRAF5/MECOM/EGFR/MAPK8IP1/MAP3K6/MAP3K13/RAP2A/DUSP10/TNFRSF11A/PJA2/MAP4K5/MTURN/EDN1/MLKL/SERPINF2/SIRPA/DUSP19/FKTN/ERN1	57
	BP	GO:0006022	aminoglycan metabolic process	54/3670	172/18866	0.000122623	0.0054076	0.00453929	CHST11/HS6ST1/CHI3L2/CHST15/B3GNT3/ST3GAL1/B3GNT9/ST3GAL4/ARSB/CSGALNACT1/GPC1/HS3ST3B1/SDC3/NDST1/DSE/UST/CSGALNACT2/VCAN/GPC4/ST3GAL3/HYAL2/AKT1/EXT1/NFKB1/CHSY1/GALNS/FUCA1/CHST14/OVGP1/B4GALT6/NDST2/ST3GAL6/TGFB1/ST3GAL2/B4GALT5/CSPG4/HS3ST1/CHST12/B3GALNT1/ITIH2/CHPF/XYLT1/B3GNT7/HPSE/DSEL/CHST7/B4GALT1/ITIH4/HYAL3/HMMR/SDC2/SPOCK2/FGF2/CEMIP	54
	BP	GO:0070304	positive regulation of stress-activated protein kinase signaling cascade	54/3670	172/18866	0.000122623	0.0054076	0.00453929	FZD8/TGFB2/FZD5/ERN2/TPD52L1/DKK1/ARHGEF5/MAP3K3/FZD4/FZD7/EPHA4/CD27/LYN/CARD9/TLR3/TLR4/MID1/HIPK2/TLR6/DAB2IP/SYK/FGD2/TRAF3/RASGRP1/SDCBP/TRAF4/APP/SASH1/MAP3K20/RASSF2/GADD45B/MAP3K4/MDFIC/ZC3H12A/SEMA3A/SCIMP/PYCARD/HMGCR/CCN2/TRAF5/MAPK8IP1/MAP3K6/MAP3K13/VEGFA/TNFRSF11A/PJA2/MAP4K5/MTURN/EDN1/MLKL/RELL1/SERPINF2/DUSP19/ERN1	54
	BP	GO:0042110	T cell activation	127/3670	483/18866	0.000125709	0.00550668	0.00462245	FZD8/DOCK8/TMEM131L/FZD5/BMP4/HLA-G/ZMIZ1/RORC/RAC1/DTX1/HLA-DMB/TNFRSF21/IL18R1/CD74/PRNP/RORA/VAV1/EGR1/CORO1A/MYB/HSPD1/SEMA4A/LCP1/RAC2/PTGER4/MR1/FZD7/CD27/HLA-DRB1/LYN/XBP1/KAT2A/CYLD/SMAD7/ZEB1/CDK6/ERBB2/SMAD3/EGR3/PIK3R1/TNFSF4/GATA3/ABL1/AKT1/BCL6/IL18/SYK/LGALS3/RASGRP1/IL23A/IL7/NLRC3/IL6ST/PDE5A/CD81/CTSL/ZBTB7B/IL27RA/ZBTB1/MSN/CCDC88B/WNT4/CAMK4/MALT1/BCL10/NFKBID/RUNX1/CSK/ITPKB/T…	127
	BP	GO:0042445	hormone metabolic process	66/3670	221/18866	0.000125999	0.00550668	0.00462245	CPE/HIF1A/ALDH1A1/CYP2W1/H6PD/CYP2S1/ALDH1A2/SDR16C5/CTSK/BACE2/KLK6/PPARGC1A/RETSAT/EGR1/RDH11/AKR1C4/HSD17B11/ADM/CYP1B1/GATA3/GCNT4/ECE1/UGT1A8/UGT1A9/ALDH9A1/UGT1A3/UGT1A7/AKR1B10/DGAT1/DUOX1/CTSL/ERO1B/UGT1A1/SCPEP1/HSD17B2/WNT4/HSD17B4/SGPL1/STC2/TCF7L2/PAX8/SELENOM/STARD3/DUOX2/PCSK7/SHH/SULT1A1/FDXR/ARNT/PCSK4/REST/DISP1/ALDH1A3/DGAT2/CYP3A5/RDH16/HSD17B6/AKR1B1/ADH1C/RDH5/LRAT/PCSK5/PLEK…	66
	BP	GO:0071692	protein localization to extracellular region	124/3670	470/18866	0.000128793	0.00559828	0.00469935	PTPRN2/ADCY5/HIF1A/TGFB2/KCNS3/SCAMP5/TLR5/IL1RN/LRP1/RAC1/ARL2BP/MYRIP/EZR/GOLPH3/ITPR1/SRI/BAIAP3/CD14/ICA1/OXCT1/PTGER4/TLR2/HLA-DRB1/LTBP2/IDH2/LYN/XBP1/AACS/MYO5A/ITPR2/JAGN1/TGFB3/TLR4/RAB3A/FBN1/LRP5/TNFSF4/UNC13B/P3H1/TLR6/SNCG/RHBDF1/SYK/MCU/NR1D1/LTBP1/GLUL/RAB8B/MYH10/ARNTL/FRMD4A/AGT/MYO18A/LGR4/ATP13A2/RAB11FIP3/ISL1/RAB11FIP2/ACHE/PPIA/BRSK2/PSAP/GAPDH/CCN3/SLC12A2/SLC2A1/TCF7L2/HMG…	124
	BP	GO:1900182	positive regulation of protein localization to nucleus	30/3670	80/18866	0.000129244	0.00559828	0.00469935	CDK5RAP3/CCT6A/JUP/HCLS1/SMAD3/PIK3R1/HYAL2/AKT1/TRIM8/ZPR1/DKC1/PINX1/ZC3H12A/SHH/GLI3/TGFB1/EIF2AK3/FLNA/PARP9/FYN/LIF/HSP90AB1/GLIS2/MAVS/SMO/ECT2/CD2AP/GTSE1/PLK1/CDK1	30
	BP	GO:0060021	roof of mouth development	33/3670	91/18866	0.000129903	0.00560194	0.00470242	EPHB2/FZD1/EPHB3/PRDM16/TGFB2/FRAS1/TSHZ1/SMAD4/TFAP2A/TBX3/TGFBR1/OSR1/TGFB3/GDF11/ARID5B/BCOR/SGPL1/TGFBR3/FZD2/CSRNP1/SKI/JAG2/SHH/GLI3/INSIG1/PKDCC/SNAI1/LRP6/GABRB3/PLEKHA1/WDPCP/MMP25/SATB2	33
	BP	GO:0036109	alpha-linolenic acid metabolic process	9/3670	13/18866	0.000131616	0.00562599	0.00472261	ACSL1/FADS2/FADS1/ACOX1/HSD17B4/SCP2/ACOT8/ELOVL5/ABCD1	9
	BP	GO:1902285	semaphorin-plexin signaling pathway involved in neuron projection guidance	9/3670	13/18866	0.000131616	0.00562599	0.00472261	PLXNC1/SEMA3F/NRP1/PLXND1/PLXNB1/SEMA3A/NRP2/PLXNB3/PLXNA3	9
	BP	GO:0090130	tissue migration	102/3670	374/18866	0.000132221	0.00562717	0.0047236	NR2F2/TACSTD2/HIF1A/TGFB2/MET/PTPRM/ADGRA2/BMP4/VIL1/ITGA3/PPM1F/PPARG/VASH1/THBS1/KANK2/S100P/CIB1/FGFBP1/PLPP3/PTPRG/ITGB2/EPHA2/ARSB/TGFBR1/MAPRE2/FGF18/S100A2/SEMA4A/DNAJA4/PRSS3/JUP/MAP3K3/RAB25/TNFSF12/LGMN/NRP1/LPXN/SRPX2/ROBO1/EGR3/SPRED1/CYP1B1/GATA3/ABL1/AKT1/DAB2IP/PLXND1/IQSEC1/PRKD1/GLUL/PRCP/PROX1/SERPINF1/SASH1/CTSH/AGT/ANLN/GLIPR2/EPB41L4B/MECP2/SLIT2/CCN3/STARD13/ZC3H12A/MTOR/SEM…	102
	BP	GO:0046879	hormone secretion	88/3670	314/18866	0.000135887	0.00575214	0.0048285	PTPRN2/CPE/ADCY5/HIF1A/KCNS3/IL1RN/LRP1/SMAD4/RAC1/ARL2BP/MYRIP/TBX3/P2RY1/ITPR1/ADORA1/SRI/BAIAP3/ICA1/LTBP4/MYB/OXCT1/FZD4/HLA-DRB1/LYN/AACS/MYO5A/ITPR2/JAGN1/ADM/LRP5/GATA3/MCU/NR1D1/GLUL/RAB8B/ARNTL/VAMP8/AGT/EXOC3L1/RAB11FIP3/ISL1/RAB11FIP2/BRSK2/CCN3/SLC2A1/TCF7L2/HMGN3/ACSL4/PAX8/SELENOM/INHA/FKBP1B/GIPR/NIBAN2/UQCC2/STX4/RAB11FIP5/RAP1A/HADH/DPP4/ABAT/SNX4/NLGN2/CACNA1D/CRY1/HMGCR/EGFR/FG…	88
	BP	GO:0072078	nephron tubule morphogenesis	28/3670	73/18866	0.000136421	0.00575214	0.0048285	PGF/TACSTD2/KIF26B/PTCH1/BMP4/SMAD4/GREB1L/PBX1/OSR1/WNK4/FAT4/PKD2/GATA3/WNT4/AGT/LGR4/PAX8/DCHS1/GZF1/SHH/GLI3/WNT2B/CTNNBIP1/NPNT/PKD1/VEGFA/SMO/FGF2	28
	BP	GO:0032535	regulation of cellular component size	104/3670	383/18866	0.000136928	0.00575214	0.0048285	IQANK1/SEMA4B/VILL/PTPRS/BAIAP2L1/VIL1/LRP1/RAC1/DISC1/EZR/CDHR5/WASH6P/SEMA4D/VAV1/CORO1A/SEMA4A/BDNF/CDHR2/XK/HCLS1/WNT3/SEMA3F/CFL2/NRP1/TMSB10/WASF2/NRCAM/CAPZB/AQP1/SNF8/SEMA4G/IQGAP2/ESAM/PEX11A/ABL1/COTL1/AKT1/TRIOBP/FCHSD2/SWAP70/FHOD3/MSN/LRRC8A/SHANK3/CDC42EP3/IFRD1/ATP13A2/ZFYVE27/WDTC1/PDXP/SCIN/SPTB/MKKS/SLIT2/SLC12A4/FCHSD1/SLC12A2/MEGF8/CLCN6/MTOR/ANAPC2/SEMA3A/TMOD2/BIN1/PYCARD/IQ…	104
	BP	GO:0010001	glial cell differentiation	68/3670	230/18866	0.000140017	0.00581772	0.00488355	EIF2B2/LPAR1/LRP1/DTX1/PPARG/BACE2/TNFRSF21/GPC1/KLF15/ROR1/GPR157/TLR2/EPHA4/LYN/LAMA2/CDK6/SIRT2/EGR2/ERBB2/TLR4/FA2H/ABL1/AKT1/CDKN2C/MXRA8/DLL1/NR1D1/NSUN5/IL6ST/ID2/APP/CD9/SPINT1/B4GALT6/ERBB3/CSK/TNFRSF1B/SKI/MTOR/ADORA2A/BIN1/SHH/GLI3/TGFB1/B4GALT5/NOTCH1/EGFR/CXCR4/NTRK2/SERPINE2/LIF/MAPT/PAX6/DUSP10/TPPP/NDRG1/SMO/SOX6/WASF3/DICER1/PRX/CDK1/GPR37L1/VIM/MDK/ABCA2/SLC45A3/ADGRG6	68
	BP	GO:0051495	positive regulation of cytoskeleton organization	68/3670	230/18866	0.000140017	0.00581772	0.00488355	LPAR1/S100A10/LIMCH1/MET/BAIAP2L1/VIL1/PPM1F/RAC1/WASH6P/ARHGEF5/TGFBR1/CORO1A/SYNPO/HCLS1/CFL2/NRP1/WASF2/TGFB3/SMAD3/IQGAP2/ABL1/ARHGEF10L/FCHSD2/POC1A/SWAP70/PROX1/WNT4/CCDC88A/CDC42EP3/PDXP/SCIN/MECP2/RHOC/MAPK15/NIN/FCHSD1/MTOR/TOGARAM1/BIN1/PYCARD/SPAG5/CCN2/EPHA1/SH3PXD2B/FLNA/TPM1/KATNB1/FHOD1/SLAIN2/MAPT/DYNC1H1/WASHC1/EVL/ICAM1/SPIRE2/AKAP9/MAP1B/EDN1/WASF3/ID1/SERPINF2/CDK5R1/PRKCE/PLK…	68
	BP	GO:0072171	mesonephric tubule morphogenesis	26/3670	66/18866	0.00014028	0.00581772	0.00488355	PGF/TACSTD2/KIF26B/PTCH1/BMP4/SMAD4/GREB1L/PBX1/OSR1/FAT4/PKD2/GATA3/WNT4/AGT/LGR4/PAX8/DCHS1/GZF1/SHH/GLI3/WNT2B/CTNNBIP1/NPNT/VEGFA/SMO/FGF2	26
	BP	GO:0060491	regulation of cell projection assembly	57/3670	185/18866	0.000142343	0.00587827	0.00493438	TACSTD2/ARHGAP44/AUTS2/PPP1R16B/RAP1GAP/EPS8L3/RAC1/PODXL/EPHA2/TGFBR1/DNM3/MIEN1/RAC2/PLEK2/DOCK11/CYLD/NRP1/COBL/WASF2/TGFB3/CAPZB/EPS8L1/KLHL41/TCHP/FAM110C/EVI5L/DEF8/CCDC88A/CDC42EP3/ANLN/ESPN/EPS8L2/ATMIN/SLIT2/MAPK15/MTOR/SYNE2/HDAC4/FSCN1/SRGAP2C/EPS8/WASHC1/CEP97/EVL/KCTD17/ICAM1/CCP110/PLD1/HAP1/DCDC2/ARHGAP35/MNS1/CDKL1/CEP135/PLXNB3/WDPCP/RDX	57
	BP	GO:0001678	cellular glucose homeostasis	49/3670	153/18866	0.000144332	0.00591032	0.00496128	PTPRN2/ADCY5/HIF1A/GAS6/LRP1/RAC1/PPARGC1A/SRI/BAIAP3/GATA4/OXCT1/SLC39A14/KLF15/HLA-DRB1/XBP1/AACS/JAGN1/HK2/PRKACA/LRP5/PIK3R1/UNC13B/MLXIPL/NR1D1/SERPINF1/NME2/GCLM/RAB11FIP2/BRSK2/NME1/HMGN3/FKBP1B/STX4/RAB11FIP5/CYBA/HMGCR/HKDC1/NUCKS1/WDR35/SYBU/FOXA3/LGALS1/ICAM1/IRS2/PPP3CA/PCK1/PRKCE/ZNF236/ERN1	49
	BP	GO:0030048	actin filament-based movement	49/3670	153/18866	0.000144332	0.00591032	0.00496128	DSC2/LIMCH1/KCNQ1/MYH14/VIL1/DSP/FRMD6/ADORA1/SRI/GATA4/DMD/TNNI2/JUP/SCN1B/MYO5A/WASF2/PDE4B/SUN2/CCDC88C/WIPF1/DSG2/MYO6/MYH10/WIPF3/CACNA1G/MYO1A/ATP2A1/RNF207/SYNE2/BIN1/CACNA1D/TNNT2/MYO1E/TMOD1/FLNA/TPM1/TNNI1/KCNJ2/NOS1AP/CACNB2/MYO9B/CACNA2D1/MYO7A/PARVA/MYO1B/AKAP9/VIM/ROCK1/GJA1	49
	BP	GO:0003382	epithelial cell morphogenesis	17/3670	36/18866	0.000150747	0.00614577	0.00515892	MET/FRMD6/FLNB/HEG1/PALLD/RILPL2/SPINT2/CLIC4/RAB25/CCDC88C/ARHGEF26/NOTCH4/CLDN3/FAT1/ID1/POF1B/ROCK1	17
	BP	GO:0044782	cilium organization	107/3670	397/18866	0.000151343	0.00614577	0.00515892	IFT43/SEPTIN6/DZIP1L/CELSR3/DYNC2H1/DISC1/CPLANE2/RILPL2/UNC119B/GALNT11/PRKAR2B/CFAP221/RSPH1/MKS1/ABLIM3/CYLD/TXNDC15/ATAT1/PRKACA/ONECUT2/PKD2/TUB/KIAA0586/TCHP/POC1A/PIBF1/TRIP11/ABCC4/TMEM231/B9D1/NEK1/KIFAP3/EVI5L/CELSR2/RPGRIP1L/CCDC88A/BBS2/SPAG16/CC2D2A/ARL3/ATMIN/CFAP20/TTC39C/DYNLRB1/DNAL1/BBS5/DNAAF2/IFT52/MKKS/ABLIM1/MAPK15/OFD1/ARL13B/CFAP44/TOGARAM1/SYNE2/UBXN10/SPATA6/NOTCH1/RAB23…	107
	BP	GO:0072028	nephron morphogenesis	29/3670	77/18866	0.0001522	0.00615496	0.00516663	PGF/TACSTD2/KIF26B/PTCH1/BMP4/SMAD4/GREB1L/PBX1/OSR1/WNK4/FAT4/PKD2/GATA3/WNT4/AGT/LGR4/PAX8/DCHS1/GZF1/SHH/GLI3/WNT2B/CTNNBIP1/NPNT/LIF/PKD1/VEGFA/SMO/FGF2	29
	BP	GO:0034754	cellular hormone metabolic process	44/3670	134/18866	0.00016398	0.00658134	0.00552456	ALDH1A1/CYP2W1/CYP2S1/ALDH1A2/SDR16C5/PPARGC1A/RETSAT/EGR1/RDH11/AKR1C4/HSD17B11/ADM/CYP1B1/ECE1/UGT1A8/UGT1A9/UGT1A3/UGT1A7/AKR1B10/DGAT1/UGT1A1/SCPEP1/HSD17B2/WNT4/HSD17B4/SGPL1/STARD3/SHH/SULT1A1/FDXR/REST/ALDH1A3/DGAT2/CYP3A5/RDH16/HSD17B6/AKR1B1/ADH1C/RDH5/LRAT/PLEKHA1/CYP26B1/LIPE/CLCN2	44
	BP	GO:0071560	cellular response to transforming growth factor beta stimulus	73/3670	252/18866	0.000164095	0.00658134	0.00552456	CHST11/PRDM16/VASN/TGFB2/WWOX/HTRA1/ZMIZ1/PDGFD/ITGA3/ENG/SMAD4/FGFR2/THBS1/EMILIN1/PPARGC1A/CGN/TGFBR1/VEPH1/LTBP4/PEG10/FOXH1/LTBP2/SMAD7/ZEB1/LPXN/TGFB3/SMAD3/FBN1/ONECUT2/SPRED1/FERMT2/HYAL2/HIPK2/COL1A1/LTBP1/SDCBP/PDE3A/WNT4/SMAD1/TGFBR3/GLG1/SPRY1/ACVR1/CLDN1/DAB2/FNTA/SKI/FOLR1/PPM1A/LTBP3/TGFB1/SPRY2/ZFYVE9/CLEC3B/NPNT/FYN/MAPK7/HSP90AB1/CD109/TWSG1/LEMD3/CITED2/EID2/CDKN1C/SKIL/EP300/AR…	73
	BP	GO:0046330	positive regulation of JNK cascade	45/3670	138/18866	0.000166536	0.0066519	0.00558378	FZD8/FZD5/ERN2/TPD52L1/DKK1/ARHGEF5/FZD4/FZD7/EPHA4/CD27/CARD9/TLR3/TLR4/HIPK2/TLR6/DAB2IP/SYK/FGD2/TRAF3/RASGRP1/SDCBP/TRAF4/APP/SASH1/MAP3K20/RASSF2/GADD45B/MAP3K4/MDFIC/SEMA3A/PYCARD/CCN2/TRAF5/MAPK8IP1/MAP3K6/MAP3K13/TNFRSF11A/PJA2/MAP4K5/MTURN/EDN1/MLKL/SERPINF2/DUSP19/ERN1	45
	BP	GO:0035148	tube formation	48/3670	150/18866	0.000171448	0.00678513	0.00569562	FZD1/PRICKLE1/HIF1A/TGFB2/PTCH1/BMP4/FGFR2/PODXL/TGM2/DLC1/SPINT2/OSR1/MKS1/LUZP1/KAT2A/COBL/ADM/ARID1A/SUFU/YWHAZ/PRKACA/GATA3/ABL1/DAB2IP/PROX1/WNT4/BCL10/SPINT1/CC2D2A/MTHFR/FZD2/IFT52/SKI/PAX8/LMO4/FOLR1/PHACTR4/SHH/TGFB1/NOTCH1/KDM6A/PRKACB/VEGFA/LRP6/ARHGAP35/DICER1/STIL/FZD6	48
	BP	GO:0032874	positive regulation of stress-activated MAPK cascade	53/3670	170/18866	0.000171855	0.00678513	0.00569562	FZD8/TGFB2/FZD5/ERN2/TPD52L1/DKK1/ARHGEF5/MAP3K3/FZD4/FZD7/EPHA4/CD27/CARD9/TLR3/TLR4/MID1/HIPK2/TLR6/DAB2IP/SYK/FGD2/TRAF3/RASGRP1/SDCBP/TRAF4/APP/SASH1/MAP3K20/RASSF2/GADD45B/MAP3K4/MDFIC/ZC3H12A/SEMA3A/SCIMP/PYCARD/HMGCR/CCN2/TRAF5/MAPK8IP1/MAP3K6/MAP3K13/VEGFA/TNFRSF11A/PJA2/MAP4K5/MTURN/EDN1/MLKL/RELL1/SERPINF2/DUSP19/ERN1	53
	BP	GO:0014065	phosphatidylinositol 3-kinase signaling	49/3670	154/18866	0.000172243	0.00678513	0.00569562	TGFB2/PPP1R16B/PDGFC/PDGFD/CAT/UNC5B/PTPN13/HCST/SEMA4D/PRR5L/ROR1/HCLS1/LYN/SIRT2/ERBB2/PIK3R1/GATA3/AKT1/DAB2IP/IL18/RASGRP1/PLXNB1/NLRC3/DIPK2A/PIP5K1B/AGT/PIP4K2A/ERBB3/PIK3CB/F2R/NOP53/EGFR/FGFR1/BTN2A2/NTRK2/SERPINE2/FYN/PIK3CD/EPOR/CEP55/FBXL2/NKX3-1/CD160/IER3/LIME1/EDN1/IRS2/GAB1/PLEKHA1	49
	BP	GO:0030203	glycosaminoglycan metabolic process	50/3670	158/18866	0.000172657	0.00678513	0.00569562	CHST11/HS6ST1/CHST15/B3GNT3/ST3GAL1/ST3GAL4/ARSB/CSGALNACT1/GPC1/HS3ST3B1/SDC3/NDST1/DSE/UST/CSGALNACT2/VCAN/GPC4/ST3GAL3/HYAL2/AKT1/EXT1/NFKB1/CHSY1/GALNS/FUCA1/CHST14/B4GALT6/NDST2/ST3GAL6/TGFB1/ST3GAL2/B4GALT5/CSPG4/HS3ST1/CHST12/ITIH2/CHPF/XYLT1/B3GNT7/HPSE/DSEL/CHST7/B4GALT1/ITIH4/HYAL3/HMMR/SDC2/SPOCK2/FGF2/CEMIP	50
	BP	GO:0070302	regulation of stress-activated protein kinase signaling cascade	70/3670	240/18866	0.000176851	0.00692206	0.00581056	FZD8/TGFB2/FZD5/ERN2/TPD52L1/EZR/DKK1/ARHGEF5/MAP3K3/FZD4/FZD7/EPHA4/CD27/LYN/CYLD/ZMYND11/CARD9/DUSP1/TLR3/TLR4/MID1/HIPK2/TLR6/AKT1/DAB2IP/SYK/FGD2/TRAF3/RASGRP1/SDCBP/TRAF4/APP/PHLPP1/SASH1/MAP3K20/RASSF2/RAPGEF1/GADD45B/MAP3K4/MDFIC/PDCD4/ZC3H12A/SEMA3A/SCIMP/PYCARD/HMGCR/CCN2/TRAF5/MECOM/EGFR/MAPK8IP1/MAP3K6/MAP3K13/FOXM1/VEGFA/RAP2A/DUSP10/TNFRSF11A/PJA2/MAP4K5/MTURN/EDN1/MLKL/RELL1/SERPINF…	70
	BP	GO:0018212	peptidyl-tyrosine modification	102/3670	377/18866	0.000182781	0.00712552	0.00598135	EPHB2/GPRC5A/EPHB3/PDGFC/MET/MST1R/GAS6/PDGFD/LRP8/ARL2BP/FGFR2/ITGB2/EPHA2/EPHA10/EFEMP1/CD74/ADORA1/SEMA4D/STAP2/PRNP/BDNF/ROR1/EPHA4/HCLS1/LYN/IL6R/SH2B3/NRP1/ERBB2/TPST1/AFAP1L2/VPS25/CBLC/DLG4/HYAL2/HIPK2/DYRK3/ABL1/CNTN1/IL18/SYK/PIBF1/IL23A/IL7/IL6ST/PTK6/CD81/NEK1/APP/AGT/ITGA5/ISL1/ERBB3/CSK/ERRFI1/ARHGEF2/ACVR1/MTOR/TGFB1/BANK1/EPHA1/EGFR/FGFR1/NEDD9/BTC/STYK1/CSPG4/NTRK2/PARP9/FYN/TTL/…	102
	BP	GO:0007159	leukocyte cell-cell adhesion	99/3670	364/18866	0.000183541	0.00712664	0.00598229	DOCK8/GCNT1/TMEM131L/BMP4/HLA-G/ZMIZ1/RAC1/DTX1/HLA-DMB/ITGB2/PTAFR/EZR/GOLPH3/SLC39A8/TNFRSF21/CD74/CCL28/SEMA4D/PRNP/VAV1/CORO1A/MYB/HSPD1/RAC2/FUT4/CD27/HLA-DRB1/LYN/XBP1/CYLD/SMAD7/FERMT3/ERBB2/ITGB7/EGR3/PIK3R1/TNFSF4/GATA3/AKT1/NT5E/BCL6/IL18/SYK/LGALS3/RASGRP1/IL23A/CERCAM/IL7/IL6ST/PDE5A/CD81/ZBTB7B/IL27RA/ZBTB1/MSN/STK10/CCDC88B/MALT1/BCL10/NFKBID/RUNX1/ITGA5/CSK/ITPKB/NFKBIZ/NRARP/GLI2/…	99
	BP	GO:0030865	cortical cytoskeleton organization	24/3670	60/18866	0.000189684	0.00723234	0.00607102	VIL1/RAC1/EZR/TLN1/RAC2/RHOD/FHOD3/ANLN/RHOC/RTKN/RHOBTB3/EPB41/EHD2/EPB41L2/FHOD1/FMNL1/RHOBTB1/RHOF/LLGL2/RHOB/ECT2/AKAP11/FMNL3/ROCK1	24
	BP	GO:0044803	multi-organism membrane organization	8/3670	11/18866	0.000190781	0.00723234	0.00607102	GAS6/HYAL2/FCHSD2/CTSL/PPIA/FCHSD1/CXCR4/PI4KA	8
	BP	GO:0051091	positive regulation of DNA-binding transcription factor activity	77/3670	270/18866	0.000190783	0.00723234	0.00607102	FZD1/PRKCH/CAT/LRP8/IRAK2/TRIM31/PPARG/CIB1/PLPP3/ITGB2/PPARGC1A/IL18R1/ARHGEF5/RIPK4/JUP/CRTC1/ROR1/TLR2/FZD4/HCLS1/STING1/CEBPG/SMAD3/TLR3/TLR4/DDIT3/LRP5/HIPK2/TLR6/AKT1/IL18/NFKB1/SAV1/PRKD1/CRTC3/TRIM8/APP/MALT1/BCL10/TRIM32/ARID5B/TRIM62/AGT/PRDX3/SLCO3A1/TRIM22/ARHGEF2/FZD2/ADCY1/SHH/IL1RAP/PYCARD/LPAR5/ESR2/TRAF5/TRIM6/HDAC4/FANK1/MAP3K13/VEGFA/RPS6KA5/ERC1/NKX3-1/MAVS/TNFRSF11A/ICAM1/FOS…	77
	BP	GO:0014066	regulation of phosphatidylinositol 3-kinase signaling	42/3670	127/18866	0.000191457	0.00723234	0.00607102	TGFB2/PPP1R16B/PDGFC/PDGFD/CAT/UNC5B/PTPN13/HCST/SEMA4D/PRR5L/ROR1/HCLS1/LYN/PIK3R1/DAB2IP/IL18/RASGRP1/PLXNB1/NLRC3/DIPK2A/PIP5K1B/AGT/PIP4K2A/ERBB3/PIK3CB/F2R/NOP53/EGFR/FGFR1/BTN2A2/NTRK2/SERPINE2/FYN/PIK3CD/EPOR/CEP55/FBXL2/NKX3-1/IER3/LIME1/IRS2/GAB1	42
	BP	GO:0017015	regulation of transforming growth factor beta receptor signaling pathway	42/3670	127/18866	0.000191457	0.00723234	0.00607102	CHST11/PRDM16/VASN/HTRA1/ITGA3/ENG/SMAD4/THBS1/EMILIN1/TGFBR1/VEPH1/LTBP4/PEG10/SMAD7/ZEB1/TGFB3/SMAD3/FBN1/ONECUT2/SPRED1/HIPK2/LTBP1/SDCBP/TGFBR3/GLG1/SPRY1/DAB2/SKI/FOLR1/PPM1A/TGFB1/SPRY2/NPNT/HSP90AB1/CD109/LEMD3/CITED2/EID2/CDKN1C/SKIL/EP300/NREP	42
	BP	GO:0030326	embryonic limb morphogenesis	42/3670	127/18866	0.000191457	0.00723234	0.00607102	CHST11/TGFB2/PTCH1/FRAS1/BMP4/ALDH1A2/SMAD4/TFAP2A/DYNC2H1/TBX3/DKK1/PBX1/OSR1/GNA12/MKS1/WNT3/LRP5/ECE1/TMEM231/B9D1/MAP3K20/RPGRIP1L/IFT52/MEGF8/GLI2/SKI/MBNL1/SHH/GLI3/NOTCH1/FGFR1/PITX1/FREM2/RUNX2/RARB/FGF9/NOTCH2/LRP6/WNT9A/WDPCP/FZD6/CYP26B1	42
	BP	GO:0035113	embryonic appendage morphogenesis	42/3670	127/18866	0.000191457	0.00723234	0.00607102	CHST11/TGFB2/PTCH1/FRAS1/BMP4/ALDH1A2/SMAD4/TFAP2A/DYNC2H1/TBX3/DKK1/PBX1/OSR1/GNA12/MKS1/WNT3/LRP5/ECE1/TMEM231/B9D1/MAP3K20/RPGRIP1L/IFT52/MEGF8/GLI2/SKI/MBNL1/SHH/GLI3/NOTCH1/FGFR1/PITX1/FREM2/RUNX2/RARB/FGF9/NOTCH2/LRP6/WNT9A/WDPCP/FZD6/CYP26B1	42
	BP	GO:0019511	peptidyl-proline hydroxylation	10/3670	16/18866	0.000193079	0.00726542	0.00609879	ERO1A/P3H1/P3H3/ERO1B/P4HA2/EGLN1/EGLN3/P4HTM/P3H2/P4HA3	10
	BP	GO:0043409	negative regulation of MAPK cascade	57/3670	187/18866	0.000195223	0.00731254	0.00613835	EPHB2/PSCA/NDRG2/BMP4/CAMK2N1/SMAD4/CDK5RAP3/EMILIN1/EZR/TIMP3/LYN/CYLD/SH2B3/ZMYND11/DUSP1/TLR4/TBC1D10C/CBLC/SPRED1/HYAL2/WNK2/ABL1/AKT1/DAB2IP/RGS3/RAPGEF1/AGT/CSK/SPRY1/ERRFI1/SMPD1/RNF149/PDCD4/MBIP/FBLN1/DUSP16/PHB/SPRY2/HMGCR/MECOM/BTN2A2/TNIP1/SORL1/MAPK8IP1/LIF/FOXM1/EFNA1/DUSP10/PTPRJ/SPRY3/ASH1L/SPRY4/GBP1/SIRPA/DUSP19/FKTN/PBK	57
	BP	GO:0001892	embryonic placenta development	32/3670	89/18866	0.000195832	0.00731254	0.00613835	NR2F2/CDX2/KRT19/HS6ST1/HIF1A/FZD5/FGFR2/VASH1/KRT8/CCN1/PLCD3/JUNB/SPINT2/ADM/PKD2/AKT1/SPINT1/TFEB/EGLN1/EGFR/ARNT/PRDM1/LIF/PKD1/PCDH12/SOCS3/E2F7/CEBPB/SNAI1/PHLDA2/PLK4/EPAS1	32
	BP	GO:0120032	regulation of plasma membrane bounded cell projection assembly	56/3670	183/18866	0.000197438	0.00734441	0.00616509	TACSTD2/ARHGAP44/AUTS2/PPP1R16B/RAP1GAP/EPS8L3/RAC1/PODXL/EPHA2/TGFBR1/DNM3/MIEN1/RAC2/PLEK2/DOCK11/CYLD/NRP1/COBL/WASF2/TGFB3/CAPZB/EPS8L1/KLHL41/TCHP/EVI5L/DEF8/CCDC88A/CDC42EP3/ANLN/ESPN/EPS8L2/ATMIN/SLIT2/MAPK15/MTOR/SYNE2/HDAC4/FSCN1/SRGAP2C/EPS8/WASHC1/CEP97/EVL/KCTD17/ICAM1/CCP110/PLD1/HAP1/DCDC2/ARHGAP35/MNS1/CDKL1/CEP135/PLXNB3/WDPCP/RDX	56
	BP	GO:0007229	integrin-mediated signaling pathway	37/3670	108/18866	0.000203004	0.00749424	0.00629087	ADAM15/ITGA3/PLPP3/ITGB2/ITGB4/CDH17/TLN1/VAV1/FERMT3/NRP1/ITGB7/ITGB6/FERMT2/ZNF304/ABL1/SYK/PRKD1/COL16A1/LAMA3/ADAMTS1/NME2/ITGA9/ITGA5/ITGA1/PHACTR4/CCN2/ISG15/NEDD9/FLNA/BST1/ITGB8/DOCK1/ITGB3/ERBIN/ITGA6/LAT/ITGA10	37
	BP	GO:0032526	response to retinoic acid	37/3670	108/18866	0.000203004	0.00749424	0.00629087	AQP3/GJB3/PTCH1/ALDH1A2/FGFR2/PPARG/RXRA/DKK1/MYB/OSR1/FZD4/FZD7/LYN/WNT3/DUSP1/AQP1/COL1A1/SERPINF1/PTK6/CTSH/HSD17B2/IGFBP7/DNAAF2/ATM/IGF2R/TESC/PTGES/MICB/TRIM16/SETX/LRAT/TNC/PCK1/WNT9A/ABL2/CYP26B1/GJA1	37
	BP	GO:0021915	neural tube development	51/3670	163/18866	0.000204501	0.007521	0.00631332	FZD1/PRICKLE1/HIF1A/TGFB2/PTCH1/DZIP1L/BMP4/ALDH1A2/DLC1/EPHA2/SPINT2/MKS1/LUZP1/KAT2A/COBL/ADM/ARID1A/SUFU/PRKACA/PKD2/ABL1/PROX1/RPGRIP1L/BCL10/SPINT1/CC2D2A/MTHFR/FZD2/SSBP3/IFT52/GLI2/SKI/ARL13B/LMO4/FOLR1/DCHS1/PHACTR4/SHH/GLI3/TGFB1/NOTCH1/KDM6A/PRKACB/PKD1/PAX6/LRP6/ARHGAP35/SMO/GORAB/STIL/FZD6	51
	BP	GO:0032872	regulation of stress-activated MAPK cascade	69/3670	237/18866	0.000207644	0.00760787	0.00638625	FZD8/TGFB2/FZD5/ERN2/TPD52L1/EZR/DKK1/ARHGEF5/MAP3K3/FZD4/FZD7/EPHA4/CD27/CYLD/ZMYND11/CARD9/DUSP1/TLR3/TLR4/MID1/HIPK2/TLR6/AKT1/DAB2IP/SYK/FGD2/TRAF3/RASGRP1/SDCBP/TRAF4/APP/PHLPP1/SASH1/MAP3K20/RASSF2/RAPGEF1/GADD45B/MAP3K4/MDFIC/PDCD4/ZC3H12A/SEMA3A/SCIMP/PYCARD/HMGCR/CCN2/TRAF5/MECOM/EGFR/MAPK8IP1/MAP3K6/MAP3K13/FOXM1/VEGFA/RAP2A/DUSP10/TNFRSF11A/PJA2/MAP4K5/MTURN/EDN1/MLKL/RELL1/SERPINF2/SI…	69
	BP	GO:0071526	semaphorin-plexin signaling pathway	18/3670	40/18866	0.000208496	0.00761048	0.00638844	SEMA4B/MET/PLXNC1/RAC1/SEMA4D/SEMA4A/SEMA3F/NRP1/SEMA4G/PLXND1/PLXNB1/SEMA3A/NRP2/FLNA/SH3BP1/SEMA3E/PLXNB3/PLXNA3	18
	BP	GO:0060537	muscle tissue development	109/3670	409/18866	0.000211448	0.00768945	0.00645473	NR2F2/TGFB2/PTCH1/MYH14/BMP4/ALDH1A2/ENG/DSP/SMAD4/FGFR2/RXRA/FLNB/TBX3/HEG1/BTG2/PPARGC1A/GPC1/DKK1/MYH11/GATA4/TGFBR1/MEIS1/EGR1/FOXH1/OSR1/NEBL/XK/MYOM2/FZD7/KAT2A/SMAD7/MAPK11/CFL2/SIRT2/EGR2/ARID1A/SMAD3/ZBTB18/TLL2/PKD2/PPP1R13L/DLL1/KLHL41/DSG2/EEF2/UBE4B/STRA6/SAV1/MYH10/SGCB/ARNTL/SAP30/PROX1/ID2/FHOD3/DIPK2A/SELENON/GPCPD1/CACYBP/SMAD1/AGT/IFRD1/TGFBR3/LUC7L/ISL1/ERBB3/ACVR1/EGLN1/CXADR…	109
	BP	GO:0009306	protein secretion	121/3670	462/18866	0.000213209	0.00769453	0.00645899	PTPRN2/ADCY5/HIF1A/TGFB2/KCNS3/SCAMP5/TLR5/IL1RN/LRP1/RAC1/ARL2BP/MYRIP/EZR/GOLPH3/ITPR1/SRI/BAIAP3/CD14/ICA1/OXCT1/PTGER4/TLR2/HLA-DRB1/LTBP2/IDH2/LYN/XBP1/AACS/MYO5A/ITPR2/JAGN1/TGFB3/TLR4/RAB3A/LRP5/TNFSF4/UNC13B/P3H1/TLR6/SNCG/RHBDF1/SYK/MCU/NR1D1/GLUL/RAB8B/MYH10/ARNTL/FRMD4A/AGT/MYO18A/LGR4/ATP13A2/RAB11FIP3/ISL1/RAB11FIP2/ACHE/PPIA/BRSK2/PSAP/GAPDH/CCN3/SLC12A2/SLC2A1/TCF7L2/HMGN3/ACSL4/F2…	121
	BP	GO:2000027	regulation of animal organ morphogenesis	73/3670	254/18866	0.000213677	0.00769453	0.00645899	FZD1/ETV5/PRICKLE1/TACSTD2/TGFB2/FZD5/BMP4/CELSR3/ENG/SMAD4/RAC1/FGFR2/TFAP2A/RXRA/CSF1/DKK1/TGFBR1/ZNRF3/BDNF/ROR1/FZD4/FZD7/MKS1/XBP1/GPC4/AP2B1/VDR/PRICKLE2/ROBO1/GATA3/ABL1/PSMC5/PSMC4/PSMD3/NTN4/CELSR2/WNT4/PSMD13/ARHGEF19/BCOR/AGT/PSMB8/LGR4/ISL1/RNF207/SPRY1/FZD2/BTBD7/ACVR1/DAB2/PAX8/SHH/NOTCH1/WNT2B/FGFR1/PSMB10/PSMD12/BASP1/LIF/JAG1/VEGFA/RUNX2/TNFRSF11B/CITED2/AP2A2/TNFAIP3/THRB/BMPR2/…	73
	BP	GO:0060541	respiratory system development	61/3670	204/18866	0.000213956	0.00769453	0.00645899	SPDEF/HS6ST1/BMP4/ALDH1A2/ITGA3/FGFR2/HEG1/FGF18/CRISPLD2/AIMP2/SIM2/TGFB3/YWHAZ/RAB3A/STRA6/SAV1/PROX1/CTSH/RPGRIP1L/ESRP2/SPRY1/ERRFI1/CIC/GLI2/SKI/SHH/GLI3/STK40/LTBP3/SPRY2/CCN2/NOTCH1/EGFR/WNT2B/FGFR1/BASP1/PKDCC/LIF/PKD1/VEGFA/FGF9/ATXN1L/DISP1/ALDH1A3/THRB/BMPR2/MMP14/LRP6/MAN1A2/EP300/PHEX/MAN2A1/FGFRL1/ID1/CCDC40/TNC/AGR2/WDPCP/EPAS1/SPEF2/FGF2	61
	BP	GO:0030166	proteoglycan biosynthetic process	25/3670	64/18866	0.000218899	0.00784333	0.0065839	CHST11/HS6ST1/CHST15/CSGALNACT1/HS3ST3B1/NDST1/DSE/UST/EXTL3/CSGALNACT2/VCAN/CHST10/BMPR1B/EXT1/CHSY1/CHST14/NDST2/TCF7L2/CSPG4/CHST12/CHPF/XYLT1/BMPR2/DSEL/CHST7	25
	BP	GO:0003091	renal water homeostasis	17/3670	37/18866	0.000228611	0.00816133	0.00685084	AQP3/ADCY5/PRKAR2B/ADCY9/PRKACA/AQP1/HYAL2/RAB11FIP2/ADCY1/ADCY4/PRKACB/ADCY3/WFS1/CYP4F12/AKR1B1/ADCY7/AKAP11	17
	BP	GO:0035592	establishment of protein localization to extracellular region	121/3670	463/18866	0.00023425	0.00833212	0.0069942	PTPRN2/ADCY5/HIF1A/TGFB2/KCNS3/SCAMP5/TLR5/IL1RN/LRP1/RAC1/ARL2BP/MYRIP/EZR/GOLPH3/ITPR1/SRI/BAIAP3/CD14/ICA1/OXCT1/PTGER4/TLR2/HLA-DRB1/LTBP2/IDH2/LYN/XBP1/AACS/MYO5A/ITPR2/JAGN1/TGFB3/TLR4/RAB3A/LRP5/TNFSF4/UNC13B/P3H1/TLR6/SNCG/RHBDF1/SYK/MCU/NR1D1/GLUL/RAB8B/MYH10/ARNTL/FRMD4A/AGT/MYO18A/LGR4/ATP13A2/RAB11FIP3/ISL1/RAB11FIP2/ACHE/PPIA/BRSK2/PSAP/GAPDH/CCN3/SLC12A2/SLC2A1/TCF7L2/HMGN3/ACSL4/F2…	121
	BP	GO:0009914	hormone transport	89/3670	323/18866	0.000235562	0.00834831	0.0070078	PTPRN2/CPE/ADCY5/HIF1A/KCNS3/IL1RN/LRP1/SMAD4/RAC1/ARL2BP/MYRIP/TBX3/P2RY1/ITPR1/ADORA1/SRI/BAIAP3/ICA1/LTBP4/MYB/OXCT1/FZD4/HLA-DRB1/LYN/AACS/MYO5A/ITPR2/JAGN1/ADM/LRP5/GATA3/MCU/NR1D1/GLUL/RAB8B/ARNTL/VAMP8/AGT/EXOC3L1/RAB11FIP3/ISL1/RAB11FIP2/BRSK2/CCN3/SLC2A1/TCF7L2/HMGN3/ACSL4/PAX8/SELENOM/INHA/FKBP1B/GIPR/NIBAN2/UQCC2/STX4/RAB11FIP5/RAP1A/HADH/DPP4/ABAT/SNX4/NLGN2/CACNA1D/CRY1/HMGCR/SLCO4A1…	89
	BP	GO:0050714	positive regulation of protein secretion	53/3670	172/18866	0.000238196	0.00838639	0.00703976	HIF1A/TGFB2/SCAMP5/LRP1/RAC1/MYRIP/EZR/GOLPH3/SRI/BAIAP3/CD14/OXCT1/PTGER4/TLR2/HLA-DRB1/XBP1/AACS/TGFB3/TLR4/TNFSF4/UNC13B/SYK/MCU/GLUL/MYH10/FRMD4A/MYO18A/ATP13A2/ISL1/ACHE/PPIA/GAPDH/TCF7L2/ACSL4/GIPR/STX4/ADORA2A/HLA-E/TGFB1/ABAT/NLGN2/PANX1/EGFR/SORL1/SYBU/DOC2B/CD2AP/IRS2/PARD6A/C1QTNF3/PRKCE/GJA1/ADAM8	53
	BP	GO:0071331	cellular response to hexose stimulus	44/3670	136/18866	0.000238357	0.00838639	0.00703976	PTPRN2/SLC26A6/ADCY5/HIF1A/GAS6/LRP1/RAC1/PPARGC1A/SRI/BAIAP3/GATA4/OXCT1/SLC39A14/HLA-DRB1/XBP1/AACS/JAGN1/PRKACA/LRP5/UNC13B/MLXIPL/NR1D1/SERPINF1/NME2/GCLM/RAB11FIP2/BRSK2/NME1/HMGN3/FKBP1B/STX4/RAB11FIP5/CYBA/HMGCR/WDR35/SYBU/LGALS1/ICAM1/IRS2/PPP3CA/PCK1/PRKCE/ZNF236/ERN1	44
	BP	GO:0106106	cold-induced thermogenesis	46/3670	144/18866	0.000242004	0.00845366	0.00709622	PRDM16/PDGFC/ALDH1A1/ACSL1/ADRB2/PPARGC1A/IL18R1/OXTR/TLR4/DDIT3/ESRRG/IL18/SYK/NR1D1/PCTP/ARNTL/ACOT11/ZBTB7B/UCP2/LCN2/FABP5/LGR4/SLC25A44/ACHE/GATM/EHMT1/MFN2/HADH/NOTCH1/CXCR4/ZNF516/LPIN1/VEGFA/DYNC1H1/PEMT/PLCL2/CEBPB/LEPR/KDM3A/RB1/ALMS1/PER2/ID1/PPARGC1B/EPAS1/GJA1	46
	BP	GO:0120161	regulation of cold-induced thermogenesis	46/3670	144/18866	0.000242004	0.00845366	0.00709622	PRDM16/PDGFC/ALDH1A1/ACSL1/ADRB2/PPARGC1A/IL18R1/OXTR/TLR4/DDIT3/ESRRG/IL18/SYK/NR1D1/PCTP/ARNTL/ACOT11/ZBTB7B/UCP2/LCN2/FABP5/LGR4/SLC25A44/ACHE/GATM/EHMT1/MFN2/HADH/NOTCH1/CXCR4/ZNF516/LPIN1/VEGFA/DYNC1H1/PEMT/PLCL2/CEBPB/LEPR/KDM3A/RB1/ALMS1/PER2/ID1/PPARGC1B/EPAS1/GJA1	46
	BP	GO:0071901	negative regulation of protein serine/threonine kinase activity	47/3670	148/18866	0.000242925	0.00845552	0.00709779	NR2F2/SFN/BMP4/CDK5RAP3/CIB1/HEG1/PRKAR2B/LYN/SH2B3/DUSP1/CBLC/LRP5/SPRED1/HHEX/HYAL2/ABL1/AKT1/DAB2IP/CDKN2C/KAT2B/RGS3/HEXIM2/AGT/INKA2/SPRY1/SMPD1/PDCD4/MBIP/DUSP16/PYCARD/SPRY2/HMGCR/SORL1/MAPK8IP1/LATS1/TNFAIP3/PKIG/DUSP10/PTPRJ/CDKN1C/LRP6/RB1/SPRY3/LATS2/SPRY4/PLK1/DUSP19	47
	BP	GO:1903078	positive regulation of protein localization to plasma membrane	24/3670	61/18866	0.000255576	0.00886422	0.00744087	EPHB2/VIL1/PRKCH/ITGA3/LRP1/CIB1/EZR/EPHA2/STAC/PRNP/CNPY4/PIK3R1/AKT1/LGALS3/SORBS1/RAB11FIP2/STX4/EGFR/CLIP3/SPTBN1/ATP2B4/NKD2/AGR2/PRKCE	24
	BP	GO:0060993	kidney morphogenesis	33/3670	94/18866	0.000262293	0.00906493	0.00760934	PGF/TACSTD2/KIF26B/GCNT1/PTCH1/FRAS1/BMP4/SMAD4/GREB1L/PBX1/OSR1/WNK4/FAT4/PKD2/GATA3/GCNT4/WNT4/AGT/LGR4/PAX8/DCHS1/GZF1/SHH/GLI3/WNT2B/CTNNBIP1/NPNT/BASP1/LIF/PKD1/VEGFA/SMO/FGF2	33
	BP	GO:0060612	adipose tissue development	19/3670	44/18866	0.000271078	0.00933541	0.00783639	RORC/CSF1/PPARGC1A/OXCT1/FTO/XBP1/AACS/PLAAT3/LRP5/ID2/ARID5B/SPTLC2/SLC25A25/SELENOM/SH3PXD2B/SORL1/AMER1/ZNF516/DGAT2	19
	BP	GO:0010575	positive regulation of vascular endothelial growth factor production	14/3670	28/18866	0.00027257	0.00935377	0.00785181	HIF1A/C3/GATA4/RORA/CXCL17/CYP1B1/IL6ST/ISL1/TGFB1/EIF2AK3/ARNT/BRCA1/HPSE/ADORA2B	14
	BP	GO:0043312	neutrophil degranulation	126/3670	487/18866	0.000275502	0.00940614	0.00789577	PTPRN2/TXNDC5/TCN1/FTH1/CAT/PIGR/DEGS1/DSP/RAC1/S100P/C3/ITGB2/PTAFR/ARSB/CYB5R3/CTSC/ANXA2/CD14/SYNGR1/NPC2/PRSS3/KCMF1/JUP/CEACAM3/TLR2/CRISPLD2/S100A11/ALDH3B1/STING1/RAB37/RAB24/AOC1/SLC27A2/RAB3A/TBC1D10C/GLIPR1/LPCAT1/IQGAP2/COTL1/PSMD3/TMBIM1/SYK/VAT1/NFKB1/EEF2/OSTF1/LGALS3/CRISP3/GALNS/CSTB/DGAT1/MAN2B1/CTSS/SDCBP/PRCP/VAMP8/CTSH/CST3/STK10/TIMP2/FUCA1/LCN2/PSMD13/NME2/KCNAB2/CXCL1/FABP5…	126
	BP	GO:0045053	protein retention in Golgi apparatus	5/3670	5/18866	0.000277957	0.00940614	0.00789577	GOLPH3/VPS13D/SORL1/VPS13A/VPS13C	5
	BP	GO:1902816	regulation of protein localization to microtubule	5/3670	5/18866	0.000277957	0.00940614	0.00789577	ABHD17C/ABHD17B/MAP1A/ABHD17A/TTBK2	5
	BP	GO:1902817	negative regulation of protein localization to microtubule	5/3670	5/18866	0.000277957	0.00940614	0.00789577	ABHD17C/ABHD17B/MAP1A/ABHD17A/TTBK2	5
	BP	GO:1903844	regulation of cellular response to transforming growth factor beta stimulus	42/3670	129/18866	0.000280219	0.00944988	0.00793248	CHST11/PRDM16/VASN/HTRA1/ITGA3/ENG/SMAD4/THBS1/EMILIN1/TGFBR1/VEPH1/LTBP4/PEG10/SMAD7/ZEB1/TGFB3/SMAD3/FBN1/ONECUT2/SPRED1/HIPK2/LTBP1/SDCBP/TGFBR3/GLG1/SPRY1/DAB2/SKI/FOLR1/PPM1A/TGFB1/SPRY2/NPNT/HSP90AB1/CD109/LEMD3/CITED2/EID2/CDKN1C/SKIL/EP300/NREP	42
	BP	GO:0071326	cellular response to monosaccharide stimulus	44/3670	137/18866	0.000285895	0.00960803	0.00806524	PTPRN2/SLC26A6/ADCY5/HIF1A/GAS6/LRP1/RAC1/PPARGC1A/SRI/BAIAP3/GATA4/OXCT1/SLC39A14/HLA-DRB1/XBP1/AACS/JAGN1/PRKACA/LRP5/UNC13B/MLXIPL/NR1D1/SERPINF1/NME2/GCLM/RAB11FIP2/BRSK2/NME1/HMGN3/FKBP1B/STX4/RAB11FIP5/CYBA/HMGCR/WDR35/SYBU/LGALS1/ICAM1/IRS2/PPP3CA/PCK1/PRKCE/ZNF236/ERN1	44
	BP	GO:0150115	cell-substrate junction organization	35/3670	102/18866	0.000287451	0.00962714	0.00808128	LAMC2/S100A10/LIMCH1/PPM1F/LRP1/RAC1/THBS1/DLC1/ITGB4/ACTN1/LAMB3/TLN1/MAPRE2/RHOD/NRP1/SMAD3/FERMT2/ABL1/IQSEC1/COL16A1/LAMA3/WNT4/ITGA5/SORBS1/LAMC1/PEAK1/VEGFA/LDB1/PTPRJ/MMP14/AJUBA/MACF1/ITGA6/WDPCP/ROCK1	35
	BP	GO:0038127	ERBB signaling pathway	46/3670	145/18866	0.000288539	0.00963048	0.00808408	PTPN3/GPRC5A/VIL1/GRB7/PIGR/EFEMP1/ADORA1/MVB12B/LGMN/ERBB2/AFAP1L2/VPS25/CBLC/PIK3R1/ABL1/AKT1/DAB2IP/FAM83B/RHBDF1/PTK6/APP/RASSF2/CCDC88A/AGT/ERBB3/HGS/SPRY1/ERRFI1/ITGA1/TGFB1/SPRY2/EGFR/BTC/RPS6KA5/PTPRJ/GAREM1/PLAUR/STAM/HIP1/ERBIN/HAP1/SOCS4/TGFA/IFI6/GAB1/AGR2	46
	BP	GO:0060675	ureteric bud morphogenesis	25/3670	65/18866	0.000290636	0.00966737	0.00811504	PGF/TACSTD2/KIF26B/PTCH1/BMP4/SMAD4/GREB1L/PBX1/FAT4/PKD2/GATA3/WNT4/AGT/LGR4/PAX8/DCHS1/GZF1/SHH/GLI3/WNT2B/CTNNBIP1/NPNT/VEGFA/SMO/FGF2	25
	BP	GO:0034446	substrate adhesion-dependent cell spreading	36/3670	106/18866	0.000298131	0.00988294	0.00829601	EPHB3/S100A10/TACSTD2/RAC1/CIB1/LAMB3/FZD4/FZD7/FERMT3/NRP1/LPXN/ITGB7/LAMB1/FERMT2/PIK3R1/MEGF9/ANTXR1/ABL1/TRIOBP/NTN4/UNC13D/ATRN/FBLN1/LAMC1/EPHA1/NEDD9/FLNA/PEAK1/EFNA1/DOCK5/DOCK1/ITGB3/AXL/PARVA/GBP1/MDK	36
	BP	GO:0050770	regulation of axonogenesis	56/3670	186/18866	0.000313328	0.0103515	0.00868933	EPHB2/SEMA4B/EPHB3/PTPRS/PLXNC1/LRP1/DISC1/SIPA1L1/MYCBP2/SEMA4D/SEMA4A/BDNF/UST/XK/EPHA4/WNT3/SEMA3F/NRP1/NRCAM/TIAM2/ROBO1/SEMA4G/ABL1/PLXND1/PLXNB1/TRAK1/IFRD1/MARK2/ZFYVE27/BRSK2/SLIT2/CHN1/NIN/MEGF8/ANAPC2/SEMA3A/ZSWIM6/NTRK2/TTL/MAP3K13/SEMA3E/VEGFA/MAP2/MAPT/EFNA1/BMPR2/SKIL/KIAA0319/TNFRSF12A/ARHGAP35/MACF1/MAP1B/PLXNB3/CDK5R1/PLXNA3/TRIM46	56
	BP	GO:0043200	response to amino acid	38/3670	114/18866	0.000315757	0.0103965	0.00872712	COL6A1/PDGFC/GLRB/PDGFD/SH3BP4/PPARGC1A/KLHL22/LYN/XBP1/ZEB1/COL1A1/BCL2L2/BCL2L1/COL16A1/BCL11A/SESN3/GCLM/MTHFR/COL5A2/CASTOR3/CASTOR1/MTOR/DNMT1/CPEB4/CYBA/CCN2/EGFR/NTRK2/FYN/RRAGD/PEMT/CPEB3/CEBPB/ASNS/ICAM1/COL4A1/EDN1/PCK1	38
	BP	GO:0090316	positive regulation of intracellular protein transport	55/3670	182/18866	0.000318138	0.0104396	0.0087633	SFN/FZD5/GAS6/CIB1/ITGB2/PRNP/PRR5L/JUP/RAC2/HCLS1/ABLIM3/ERBB2/SREBF2/SMAD3/YWHAZ/PRKACA/PIK3R1/HYAL2/CD81/ZPR1/CACNB3/PPP1R13B/EDEM1/SEC16A/TCF7L2/NPEPPS/ZC3H12A/E2F1/SHH/GLI3/PPM1A/TGFB1/BCAP31/BBC3/VAMP2/FLNA/SORL1/FYN/RIPOR1/HSP90AB1/ANK3/STOM/MAVS/RAB29/TCAF1/TCAF2/SMO/ECT2/MTCL1/GTSE1/CDK1/CDK5R1/CAMK1/C2CD5/CEMIP	55
	BP	GO:0043393	regulation of protein binding	62/3670	211/18866	0.000322594	0.0105503	0.00885624	MET/ADAM15/BMP4/ADRB2/LRP1/CAPRIN2/DISC1/PIM2/ANXA2/DKK1/SMARCD3/TGFBR1/BDNF/LDLRAP1/AMFR/EPHA4/CYLD/NRP1/STING1/PRKACA/ATP2A3/PCBD1/HIPK2/ABL1/AKT1/PLXND1/IFIT2/APP/MARK2/TGFBR3/DAB2/SPPL3/TCF7L2/DDX11/PLK2/HDAC4/EPB41/PCSK9/AURKA/SORL1/CTNNBIP1/PKD1/HSP90AB1/B2M/MAP2/CCPG1/LRRC6/PLCL2/NKX3-1/AURKB/SLPI/TTBK2/EP300/LFNG/RAPGEF2/ZFPM1/TMC8/ID1/PLK1/PHLDA2/CAMK1/ROCK1	62
	BP	GO:0001659	temperature homeostasis	53/3670	174/18866	0.000326835	0.0106533	0.00894266	PRDM16/PDGFC/ALDH1A1/ACSL1/ADRB2/PPARGC1A/IL18R1/ADORA1/OXTR/EGR1/SLC27A1/FTO/NTSR1/TLR4/DDIT3/ESRRG/IL18/SYK/NR1D1/PCTP/ARNTL/ACOT11/ZBTB7B/UCP2/LCN2/FABP5/LGR4/SLC25A44/ACHE/GATM/EHMT1/MFN2/HADH/ABAT/NOTCH1/CXCR4/ZNF516/LPIN1/VEGFA/DYNC1H1/PEMT/PLCL2/CEBPB/LEPR/TNFRSF11A/KDM3A/RB1/ALMS1/PER2/ID1/PPARGC1B/EPAS1/GJA1	53
	BP	GO:0071333	cellular response to glucose stimulus	43/3670	134/18866	0.000339917	0.0110428	0.00926959	PTPRN2/ADCY5/HIF1A/GAS6/LRP1/RAC1/PPARGC1A/SRI/BAIAP3/GATA4/OXCT1/SLC39A14/HLA-DRB1/XBP1/AACS/JAGN1/PRKACA/LRP5/UNC13B/MLXIPL/NR1D1/SERPINF1/NME2/GCLM/RAB11FIP2/BRSK2/NME1/HMGN3/FKBP1B/STX4/RAB11FIP5/CYBA/HMGCR/WDR35/SYBU/LGALS1/ICAM1/IRS2/PPP3CA/PCK1/PRKCE/ZNF236/ERN1	43
	BP	GO:0035107	appendage morphogenesis	47/3670	150/18866	0.000342414	0.0110502	0.00927584	CHST11/TGFB2/PTCH1/FRAS1/BMP4/ALDH1A2/SMAD4/FGFR2/TFAP2A/DYNC2H1/TBX3/DKK1/PBX1/OSR1/GNA12/MKS1/WNT3/LRP5/BMPR1B/ECE1/TMEM231/B9D1/MAP3K20/RPGRIP1L/IFT52/MEGF8/GLI2/SKI/MBNL1/SHH/GLI3/NOTCH1/FGFR1/PITX1/PKDCC/FREM2/RUNX2/RARB/FGF9/NOTCH2/LRP6/PCSK5/WNT9A/WDPCP/FZD6/CYP26B1/ATRX	47
	BP	GO:0035108	limb morphogenesis	47/3670	150/18866	0.000342414	0.0110502	0.00927584	CHST11/TGFB2/PTCH1/FRAS1/BMP4/ALDH1A2/SMAD4/FGFR2/TFAP2A/DYNC2H1/TBX3/DKK1/PBX1/OSR1/GNA12/MKS1/WNT3/LRP5/BMPR1B/ECE1/TMEM231/B9D1/MAP3K20/RPGRIP1L/IFT52/MEGF8/GLI2/SKI/MBNL1/SHH/GLI3/NOTCH1/FGFR1/PITX1/PKDCC/FREM2/RUNX2/RARB/FGF9/NOTCH2/LRP6/PCSK5/WNT9A/WDPCP/FZD6/CYP26B1/ATRX	47
	BP	GO:0002283	neutrophil activation involved in immune response	126/3670	490/18866	0.00035997	0.0115784	0.00971925	PTPRN2/TXNDC5/TCN1/FTH1/CAT/PIGR/DEGS1/DSP/RAC1/S100P/C3/ITGB2/PTAFR/ARSB/CYB5R3/CTSC/ANXA2/CD14/SYNGR1/NPC2/PRSS3/KCMF1/JUP/CEACAM3/TLR2/CRISPLD2/S100A11/ALDH3B1/STING1/RAB37/RAB24/AOC1/SLC27A2/RAB3A/TBC1D10C/GLIPR1/LPCAT1/IQGAP2/COTL1/PSMD3/TMBIM1/SYK/VAT1/NFKB1/EEF2/OSTF1/LGALS3/CRISP3/GALNS/CSTB/DGAT1/MAN2B1/CTSS/SDCBP/PRCP/VAMP8/CTSH/CST3/STK10/TIMP2/FUCA1/LCN2/PSMD13/NME2/KCNAB2/CXCL1/FABP5…	126
	BP	GO:0043433	negative regulation of DNA-binding transcription factor activity	55/3670	183/18866	0.000370001	0.0118619	0.00995722	PTCH1/GAS6/CAT/DAP/IRAK2/CDK5RAP3/SRI/PRNP/FOXH1/CYLD/SMAD7/SUFU/CEBPG/ANXA4/DDIT3/WWP2/PLA2G10/NLRC5/CYP1B1/PKD2/TNFSF4/DAB2IP/TRAF3/NLRC3/PROX1/ID2/NFKBID/EGLN1/TCF7L2/TAX1BP1/TRAIP/ZC3H12A/CARD8/TAF3/PYCARD/HDAC4/FLNA/CTNNBIP1/PKD1/TONSL/GLIS2/HMOX1/WFS1/TNFAIP3/COMMD6/PKHD1/HES6/RB1/ERBIN/TBX6/MTURN/ID1/EZH2/FZD6/FOXP3	55
	BP	GO:0060674	placenta blood vessel development	16/3670	35/18866	0.000373666	0.0119401	0.0100229	NR2F2/HS6ST1/FZD5/VASH1/CCN1/PLCD3/JUNB/ARID1A/PKD2/AKT1/SPINT1/PKD1/ITGB8/SOCS3/NOTCH2/FOSL1	16
	BP	GO:0009312	oligosaccharide biosynthetic process	10/3670	17/18866	0.000387094	0.0123225	0.0103438	ST3GAL4/ST6GALNAC6/FUT3/MGAT2/ST6GALNAC1/SLC2A1/ST3GAL2/FBP1/B3GALNT1/B4GALT1	10
	BP	GO:0032386	regulation of intracellular transport	96/3670	358/18866	0.000388212	0.0123225	0.0103438	ARHGAP44/SFN/FZD5/BMP4/GAS6/SIRT7/REEP1/CIB1/ITGB2/EZR/ANXA2/PRNP/PRR5L/LCP1/LDLRAP1/JUP/RAC2/HCLS1/ABLIM3/ERBB2/SUFU/SREBF2/SMAD3/RBM26/YWHAZ/PRKACA/UBE2J1/PIK3R1/HYAL2/DERL3/TBC1D20/CD81/ZPR1/MSN/ATP13A2/CACNB3/ATP2A1/PPP1R13B/BRSK2/EDEM1/SCP2/SEC16A/MDFIC/DAB2/MAPK15/TCF7L2/NPEPPS/ZC3H12A/E2F1/SHH/NUCB1/GLI3/PPM1A/TGFB1/SPAG5/BCAP31/IFI27/BBC3/VAMP2/RAB23/EHD2/PCSK9/FLNA/SORL1/FYN/RIPOR1/INSIG…	96
	BP	GO:0033500	carbohydrate homeostasis	70/3670	246/18866	0.000389424	0.0123225	0.0103438	PTPRN2/ADCY5/HIF1A/OAS1/PTCH1/GAS6/LRP1/RAC1/PPARG/BACE2/PPARGC1A/SRI/BAIAP3/GATA4/OXCT1/SLC39A14/KLF15/CRY2/HLA-DRB1/XBP1/AACS/JAGN1/HK2/PRKACA/LRP5/PIK3R1/UNC13B/AKT1/MCU/MLXIPL/NR1D1/PRCP/SERPINF1/ERO1B/SESN3/NME2/FABP5/GCLM/RAB11FIP2/BRSK2/NME1/TCF7L2/HMGN3/FKBP1B/BHLHA15/STX4/RAB11FIP5/CYBA/CRY1/HMGCR/HKDC1/NUCKS1/WDR35/SYBU/TENT4B/FOXA3/LGALS1/PAX6/WFS1/LEPR/ICAM1/HNF1A/NMB/IRS2/PPP3CA/HNF4…	70
	BP	GO:0050808	synapse organization	113/3670	433/18866	0.000391601	0.0123513	0.010368	EPHB2/FZD1/EPHB3/ETV5/NFIA/ARHGAP44/GLRB/PTPRS/ABHD17C/FZD5/CLSTN3/PCDHGC3/ITGA3/LRP8/CAPRIN2/C3/PCDHGC5/PCDHGC4/DISC1/ABHD17B/SIPA1L1/DKK1/COL4A5/ACTN1/SEMA4D/PRNP/DNM3/OXTR/SLITRK6/SEMA4A/BDNF/TLR2/SYNPO/EPHA4/SEMA3F/SNCA/MYO5A/GPC4/LGMN/NRP1/WASF2/NRCAM/ERBB2/SRPX2/YWHAZ/CLSTN1/RAB3A/DLG4/CDC20/UNC13B/ABL1/IGSF9/DAB2IP/PLXND1/SNCG/PLXNB1/MYH10/APP/FLRT3/SHANK3/DLG2/ADGRL1/CACNB3/ACHE/MECP2/AMI…	113
	BP	GO:1901888	regulation of cell junction assembly	59/3670	200/18866	0.000396694	0.0124703	0.0104679	EPHB2/FZD1/EPHB3/S100A10/LIMCH1/PTPRS/FZD5/PRKCH/CLSTN3/PPM1F/LRP1/RAC1/THBS1/DLC1/EPHA2/DKK1/SEMA4D/OXTR/SLITRK6/SEMA4A/BDNF/TLR2/RHOD/SNCA/GPC4/NRP1/SRPX2/SMAD3/PRKACA/CLSTN1/ABL1/COL16A1/APP/FLRT3/WNT4/RAPGEF1/ADGRL1/AGT/RUNX1/AMIGO2/CLDN1/RAP1A/IL1RAP/NLGN2/CLDN3/NTRK2/ADGRB2/PEAK1/VEGFA/LDB1/PTPRJ/SNAI1/MMP14/LRFN4/RAPGEF2/MACF1/WDPCP/ROCK1/GJA1	59
	BP	GO:0046394	carboxylic acid biosynthetic process	98/3670	367/18866	0.000398071	0.0124703	0.0104679	PLA2G4F/SCD5/ALDH1A2/DEGS1/KYNU/PTGS1/LIPH/CD74/OAT/RIMKLB/NANP/DSE/AKR1C4/UST/VCAN/PLA2G4A/XBP1/LTC4S/MYO5A/SHMT1/FADS2/SLC27A2/GCH1/LIPG/FADS1/FA2H/GPX4/SYK/PRXL2B/MLXIPL/NFKB1/NR1D1/PIBF1/GLUL/QKI/ALDH18A1/PROX1/MID1IP1/ERLIN2/HSD17B4/FABP5/FPGS/CHST14/DPYD/ATIC/MTRR/MTHFR/HACD4/WDTC1/SCP2/APIP/GATM/DAGLB/CBS/PLOD2/DHFR2/ACSF3/ACOT8/EIF6/TGFB1/ABAT/AASS/SEPHS1/ACACB/CSPG4/NDUFAB1/ELOVL5/CHST12…	98
	BP	GO:0001658	branching involved in ureteric bud morphogenesis	23/3670	59/18866	0.000399214	0.0124703	0.0104679	PGF/TACSTD2/PTCH1/BMP4/SMAD4/GREB1L/PBX1/FAT4/PKD2/WNT4/AGT/LGR4/PAX8/DCHS1/GZF1/SHH/GLI3/WNT2B/CTNNBIP1/NPNT/VEGFA/SMO/FGF2	23
	BP	GO:1990845	adaptive thermogenesis	48/3670	155/18866	0.000402318	0.012494	0.0104878	PRDM16/PDGFC/ALDH1A1/ACSL1/ADRB2/PPARGC1A/IL18R1/OXTR/TLR4/DDIT3/ESRRG/IL18/SYK/NR1D1/UCP3/PCTP/ARNTL/ACOT11/ZBTB7B/UCP2/LCN2/FABP5/LGR4/SLC25A44/ACHE/GATM/EHMT1/MFN2/HADH/NOTCH1/CXCR4/SORL1/ZNF516/LPIN1/VEGFA/DYNC1H1/PEMT/PLCL2/CEBPB/LEPR/KDM3A/RB1/ALMS1/PER2/ID1/PPARGC1B/EPAS1/GJA1	48
	BP	GO:0016331	morphogenesis of embryonic epithelium	47/3670	151/18866	0.00040472	0.012494	0.0104878	FZD1/PRICKLE1/HIF1A/TGFB2/PTCH1/BMP4/ALDH1A2/FGFR2/TFAP2A/DLC1/SPINT2/OSR1/MKS1/LUZP1/KAT2A/COBL/ADM/ARID1A/SUFU/PRKACA/GATA3/ABL1/WNT4/BCL10/SPINT1/TBX18/CC2D2A/MTHFR/FZD2/IFT52/GLI2/SKI/PAX8/LMO4/FOLR1/JAG2/PHACTR4/SHH/TGFB1/WNT2B/KDM6A/PRKACB/ALDH1A3/LRP6/ARHGAP35/STIL/FZD6	47
	BP	GO:0003176	aortic valve development	15/3670	32/18866	0.000405953	0.012494	0.0104878	BMP4/EMILIN1/GATA4/ROBO1/GATA3/TNFRSF1B/SLIT2/TGFB1/NOTCH1/JAG1/EFNA1/SNAI1/BMPR2/RB1/ROCK1	15
	BP	GO:0048565	digestive tract development	43/3670	135/18866	0.000406226	0.012494	0.0104878	SPDEF/EPHB3/CDX2/HIF1A/TGFB2/PDGFC/BMP4/ALDH1A2/FGFR2/GATA4/OXTR/COBL/FAT4/TGFB3/SMAD3/CXCL8/STRA6/SAV1/IL6ST/PTK6/ID2/LGR4/MEGF8/GLI2/DCHS1/SHH/GLI3/NOTCH1/EGFR/PRDM1/PKDCC/PKD1/RARB/FGF9/RBPMS2/RB1/SMO/CCNB1/PCSK5/RARRES2/CCDC40/AGR2/TYMS	43
	BP	GO:0055123	digestive system development	46/3670	147/18866	0.000406383	0.012494	0.0104878	SPDEF/EPHB3/CDX2/HIF1A/TGFB2/PDGFC/BMP4/ALDH1A2/FGFR2/GATA4/OXTR/XBP1/COBL/FAT4/TGFB3/SMAD3/CXCL8/STRA6/SAV1/IL6ST/PTK6/ID2/LGR4/SRP54/MEGF8/GLI2/DCHS1/SHH/GLI3/NOTCH1/EGFR/PRDM1/PKDCC/PKD1/RARB/FGF9/RBPMS2/RB1/SMO/CCNB1/PCSK5/RARRES2/CCDC40/AGR2/WDPCP/TYMS	46
	BP	GO:0043123	positive regulation of I-kappaB kinase/NF-kappaB signaling	56/3670	188/18866	0.000421501	0.0128852	0.0108162	LPAR1/APOL3/TGM2/TFG/PIM2/CASP1/CD74/ROR1/MAP3K3/HLA-DRB1/CXXC5/CARD9/TLR3/TLR4/ABL1/TLR6/AKT1/BIRC3/PRKD1/TRIM8/SECTM1/MALT1/BCL10/TRIM32/TRIM62/TRIM22/RHOC/TNFRSF10B/F2R/TIFA/PLK2/SLC20A1/PPM1A/CASP10/TRAF5/TRIM6/FLNA/NEK6/FYN/S100A4/LITAF/LGALS1/HMOX1/BST2/MIB2/MAVS/PELI2/ANKRD17/AJUBA/ECT2/MID2/NDFIP2/GPRC5B/PRKCE/UBD/GJA1	56
	BP	GO:0009880	embryonic pattern specification	26/3670	70/18866	0.00042175	0.0128852	0.0108162	PTCH1/FZD5/SMAD4/MEIS2/FGFR2/TBX3/MEIS1/SEMA3F/NRP1/COBL/SIM2/SMAD3/DLL1/SMAD1/NRARP/SEMA3A/SHH/NRP2/KDM6A/BASP1/DISP1/LRP6/TBX6/PGAP1/STIL/SATB2	26
	BP	GO:0033157	regulation of intracellular protein transport	74/3670	264/18866	0.000440332	0.0133431	0.0112006	ARHGAP44/SFN/FZD5/BMP4/GAS6/SIRT7/CIB1/ITGB2/PRNP/PRR5L/LCP1/JUP/RAC2/HCLS1/ABLIM3/ERBB2/SUFU/SREBF2/SMAD3/YWHAZ/PRKACA/UBE2J1/PIK3R1/HYAL2/DERL3/CD81/ZPR1/ATP13A2/CACNB3/PPP1R13B/BRSK2/EDEM1/SEC16A/MDFIC/TCF7L2/NPEPPS/ZC3H12A/E2F1/SHH/NUCB1/GLI3/PPM1A/TGFB1/BCAP31/IFI27/BBC3/VAMP2/RAB23/FLNA/SORL1/FYN/RIPOR1/INSIG1/HSP90AB1/LMAN1/PKIG/ANK3/STOM/MAVS/RAB29/TCAF1/TCAF2/YOD1/SMO/ECT2/PTPN14/MTCL1/G…	74
	BP	GO:0016053	organic acid biosynthetic process	98/3670	368/18866	0.000440559	0.0133431	0.0112006	PLA2G4F/SCD5/ALDH1A2/DEGS1/KYNU/PTGS1/LIPH/CD74/OAT/RIMKLB/NANP/DSE/AKR1C4/UST/VCAN/PLA2G4A/XBP1/LTC4S/MYO5A/SHMT1/FADS2/SLC27A2/GCH1/LIPG/FADS1/FA2H/GPX4/SYK/PRXL2B/MLXIPL/NFKB1/NR1D1/PIBF1/GLUL/QKI/ALDH18A1/PROX1/MID1IP1/ERLIN2/HSD17B4/FABP5/FPGS/CHST14/DPYD/ATIC/MTRR/MTHFR/HACD4/WDTC1/SCP2/APIP/GATM/DAGLB/CBS/PLOD2/DHFR2/ACSF3/ACOT8/EIF6/TGFB1/ABAT/AASS/SEPHS1/ACACB/CSPG4/NDUFAB1/ELOVL5/CHST12…	98
	BP	GO:0110110	positive regulation of animal organ morphogenesis	30/3670	85/18866	0.000440847	0.0133431	0.0112006	TGFB2/BMP4/ENG/SMAD4/FGFR2/TFAP2A/CSF1/DKK1/TGFBR1/XBP1/VDR/ROBO1/GATA3/WNT4/AGT/LGR4/SPRY1/ACVR1/PAX8/NOTCH1/WNT2B/FGFR1/BASP1/LIF/JAG1/VEGFA/TNFAIP3/SMO/EDN1/MDK	30
	BP	GO:0003002	regionalization	95/3670	355/18866	0.000447359	0.0134722	0.0113089	NR2F2/CDX2/PTCH1/DZIP1L/TSHZ1/FZD5/BMP4/ALDH1A2/SMAD4/FGFR2/AXIN2/DYNC2H1/C3/TBX3/BTG2/DKK1/GATA4/SMARCD3/TGFBR1/PBX1/FOXH1/OSR1/MKS1/WNT3/KAT2A/SEMA3F/NRP1/COBL/EGR2/SUFU/SMAD3/PRKACA/DDIT3/ROBO1/LRP5/HHEX/BMPR1B/HIPK2/PBX3/DLL1/CHSY1/ADGRG1/CELSR2/RPGRIP1L/GDF11/TBX18/ISL1/SPRY1/SSBP3/IFT52/NRARP/ACVR1/OTX1/SCMH1/MEGF8/GLI2/SKI/PAX8/ARL13B/SEMA3A/NBL1/SHH/GLI3/ATM/TBX19/NRP2/NOTCH1/WNT2B/FGFR1/…	95
	BP	GO:0001523	retinoid metabolic process	36/3670	108/18866	0.000447876	0.0134722	0.0113089	ALDH1A1/CYP2W1/CYP2S1/ALDH1A2/LRP8/LRP1/SDR16C5/GPC1/RETSAT/SDC3/RDH11/AKR1C4/GPC4/CYP1B1/UGT1A8/UGT1A9/UGT1A3/UGT1A7/STRA6/AKR1B10/DGAT1/CYP4V2/UGT1A1/SCPEP1/ALDH1A3/DGAT2/CYP3A5/RDH16/AKR1B1/ADH1C/RDH5/LRAT/RARRES2/SDC2/CYP26B1/LIPE	36
	BP	GO:0015698	inorganic anion transport	52/3670	172/18866	0.00045091	0.0135218	0.0113505	SLC34A2/APOL1/FXYD3/CLDN4/SLC26A6/VDAC1/BEST1/GLRB/PTAFR/SLC39A8/SLC4A4/GABRP/PRNP/SLC4A3/SLC39A14/CLIC4/CRY2/GABRE/CLIC1/CA2/WNK4/SLC25A30/ANO9/SLC4A7/SLC25A10/IP6K2/LRRC8A/TTYH2/SLC26A9/SLC12A4/SLC12A2/CLCN6/MTOR/LRRC8E/CLCN5/SLC20A1/FGFR1/SLC25A14/SLC37A4/BEST4/LRRC8C/SLC1A4/CEBPB/SLC26A2/PRKG2/GABRB3/SLC26A1/GPR89B/TTYH3/TTYH1/CLCN2/CLCN4	52
	BP	GO:0007156	homophilic cell adhesion via plasma membrane adhesion molecules	51/3670	168/18866	0.000457278	0.0136707	0.0114755	DSC2/PTPRM/PCDHGA9/CELSR3/CLSTN3/PCDHGC3/PCDHGB6/PCDHGA4/PCDHGB1/PCDHGA6/PCDHGA12/PCDHGB7/PCDHGA3/PCDHGA2/PCDHGA11/PCDHGA1/PCDHGC5/PCDHGC4/PCDHGB3/PCDHGA8/PCDHGA5/PCDHGA7/PCDHGB4/PALLD/PCDHGA10/PCDHGB2/CDHR5/CDH17/CEACAM5/CDHR2/NECTIN4/FAT4/CLSTN1/ROBO1/ESAM/IGSF9/DSG2/NECTIN3/CELSR2/CDH24/CDH3/AMIGO2/NPTN/DCHS1/CDH23/TENM3/PKD1/PCDH12/PCDH9/FAT1/PLXNB3	51
	BP	GO:1902287	semaphorin-plexin signaling pathway involved in axon guidance	8/3670	12/18866	0.000474334	0.0141372	0.0118671	PLXNC1/SEMA3F/NRP1/PLXND1/PLXNB1/SEMA3A/PLXNB3/PLXNA3	8
	BP	GO:0062197	cellular response to chemical stress	96/3670	360/18866	0.000476513	0.0141588	0.0118853	FZD1/ETV5/FBLN5/HIF1A/MET/ERO1A/GPX8/PDGFD/CAT/PPARG/PPARGC1A/GUCY1B1/GATA4/PRR5L/NCF2/GPX3/MYB/SNCA/ALDH3B1/SIRT2/TLR4/AQP1/DDIT3/MAPKAP1/GCH1/BRF2/CYP1B1/PKD2/ABL1/TLR6/AKT1/PRKD1/ARNTL/CST3/LCN2/NME2/SOD2/ANKZF1/PRDX3/MAP1LC3A/ATP13A2/ERRFI1/ARHGEF2/PSAP/TXNRD1/FANCC/VRK2/SLC2A1/MBIP/ZC3H12A/LRRC8E/STX4/TLDC2/CYBA/ATM/BDKRB2/EGFR/EIF2AK3/ARNT/TPM1/FYN/MAPK7/REST/MTR/ERCC6L2/LRRC8C/MAPT/MYLK/GP…	96
	BP	GO:0006486	protein glycosylation	71/3670	252/18866	0.000484743	0.0143161	0.0120173	FUT6/GCNT1/ST3GAL5/ST8SIA4/B3GNT3/POGLUT3/ST3GAL1/MUC6/MAN1C1/MAN1A1/MUC5B/B3GNT9/GALNT10/ST3GAL4/ST6GALNAC6/SLC39A8/NPC1/ABO/ST6GAL1/GALNT11/GALNT18/GALNT2/EXTL3/FUT4/FUT3/ST3GAL3/MGAT2/UBE2J1/DHDDS/GCNT4/DERL3/EXT1/ST6GALNAC2/TRIP11/ST6GALNAC1/ALG8/GALNT4/TRAK1/MGAT5/B4GALT6/SLC35C1/ST6GALNAC4/MGAT4B/ST3GAL6/FKRP/MUC13/ST3GAL2/MUC4/B4GALT5/GXYLT2/POGLUT2/MUC3A/PMM1/B3GALNT1/LMAN1/B3GALNT2/ALG3/…	71
	BP	GO:0043413	macromolecule glycosylation	71/3670	252/18866	0.000484743	0.0143161	0.0120173	FUT6/GCNT1/ST3GAL5/ST8SIA4/B3GNT3/POGLUT3/ST3GAL1/MUC6/MAN1C1/MAN1A1/MUC5B/B3GNT9/GALNT10/ST3GAL4/ST6GALNAC6/SLC39A8/NPC1/ABO/ST6GAL1/GALNT11/GALNT18/GALNT2/EXTL3/FUT4/FUT3/ST3GAL3/MGAT2/UBE2J1/DHDDS/GCNT4/DERL3/EXT1/ST6GALNAC2/TRIP11/ST6GALNAC1/ALG8/GALNT4/TRAK1/MGAT5/B4GALT6/SLC35C1/ST6GALNAC4/MGAT4B/ST3GAL6/FKRP/MUC13/ST3GAL2/MUC4/B4GALT5/GXYLT2/POGLUT2/MUC3A/PMM1/B3GALNT1/LMAN1/B3GALNT2/ALG3/…	71
	BP	GO:0019216	regulation of lipid metabolic process	112/3670	431/18866	0.00049113	0.0144609	0.0121388	FABP3/H6PD/ACSL1/RORC/PPARG/RXRA/C3/RGL1/CCN1/GOLM1/PPARGC1A/TNFRSF21/CD74/ADORA1/LSR/SMARCD3/RORA/EGR1/NPC2/SLC27A1/OPA3/LDLRAP1/LYN/MBTPS1/ADM/VDR/TIAM2/SREBF2/FADS1/GLIPR1/PIK3R1/LPCAT1/PEX11A/AKT1/DAB2IP/UGT1A8/UGT1A9/MLXIPL/NFKB1/AADAC/NR1D1/PIBF1/ACOX1/PRKD1/CRTC3/ORMDL2/PROX1/CD81/ID2/UGT1A1/MID1IP1/ERLIN2/WNT4/FABP5/FMO5/PDP2/IGFBP7/AGT/SORBS1/FMC1/GRHL1/WDTC1/PDPR/PSAP/TXNRD1/FITM2/TYSND…	112
	BP	GO:0043254	regulation of protein-containing complex assembly	116/3670	449/18866	0.000499289	0.0146568	0.0123033	IQANK1/MMP1/VILL/MET/STXBP6/BAIAP2L1/VIL1/RAC1/CLDN7/WASH6P/DKK1/ARHGEF5/CDH17/CORO1A/H3-3B/LCP1/PTGER4/HCLS1/SNCA/TMSB10/WASF2/SIRT2/ATAT1/CAPZB/TLR4/RAB3A/FKBP4/IQGAP2/ESAM/UNC13B/ABL1/TLR6/PSMC5/COTL1/DAB2IP/PSMC4/SYK/TRIOBP/FCHSD2/LGALS3/NLRC3/FHOD3/MSN/H3-3A/JAM3/CDC42EP3/RPA2/ISL1/HJURP/SCIN/ARHGEF2/SPTB/MECP2/MKKS/SLIT2/RHOC/STXBP1/MAPK15/NIN/FCHSD1/LMO4/MTOR/TOGARAM1/TMOD2/BIN1/DDB2/PPM1A…	116
	BP	GO:1990823	response to leukemia inhibitory factor	33/3670	97/18866	0.000503646	0.0146962	0.0123364	TLE4/DTX1/MPC1/MRAS/SYNGR1/MRPL15/FZD4/XBP1/PCOLCE/SMAD7/SHMT1/SRM/HK2/PRDM5/PLA2G10/EIF4A2/ARID5B/CACYBP/GCLM/RNF138/SPRY2/NRP2/WDR35/PMM1/SOCS3/EPS8/PAX6/ICAM1/KDM3A/JARID2/LRAT/PTP4A3/SPOCK2	33
	BP	GO:1990830	cellular response to leukemia inhibitory factor	33/3670	97/18866	0.000503646	0.0146962	0.0123364	TLE4/DTX1/MPC1/MRAS/SYNGR1/MRPL15/FZD4/XBP1/PCOLCE/SMAD7/SHMT1/SRM/HK2/PRDM5/PLA2G10/EIF4A2/ARID5B/CACYBP/GCLM/RNF138/SPRY2/NRP2/WDR35/PMM1/SOCS3/EPS8/PAX6/ICAM1/KDM3A/JARID2/LRAT/PTP4A3/SPOCK2	33
	BP	GO:0030323	respiratory tube development	54/3670	181/18866	0.000506605	0.0147384	0.0123718	SPDEF/HS6ST1/BMP4/ALDH1A2/ITGA3/FGFR2/HEG1/FGF18/CRISPLD2/AIMP2/SIM2/TGFB3/YWHAZ/RAB3A/STRA6/SAV1/PROX1/TRAF4/CTSH/ESRP2/SPRY1/ERRFI1/CIC/GLI2/SHH/GLI3/STK40/LTBP3/SPRY2/CCN2/NOTCH1/EGFR/WNT2B/FGFR1/PKDCC/LIF/PKD1/VEGFA/FGF9/ATXN1L/THRB/BMPR2/MMP14/MAN1A2/EP300/PHEX/MAN2A1/PCSK5/ID1/CCDC40/TNC/AGR2/EPAS1/FGF2	54
	BP	GO:0018108	peptidyl-tyrosine phosphorylation	99/3670	374/18866	0.000517068	0.0149981	0.0125898	EPHB2/GPRC5A/EPHB3/PDGFC/MET/MST1R/GAS6/PDGFD/LRP8/ARL2BP/FGFR2/ITGB2/EPHA2/EPHA10/EFEMP1/CD74/ADORA1/SEMA4D/STAP2/PRNP/BDNF/ROR1/EPHA4/HCLS1/LYN/IL6R/SH2B3/NRP1/ERBB2/AFAP1L2/VPS25/CBLC/DLG4/HYAL2/HIPK2/DYRK3/ABL1/CNTN1/IL18/SYK/PIBF1/IL23A/IL7/IL6ST/PTK6/CD81/NEK1/APP/AGT/ITGA5/ISL1/ERBB3/CSK/ERRFI1/ARHGEF2/ACVR1/MTOR/TGFB1/BANK1/EPHA1/EGFR/FGFR1/NEDD9/BTC/STYK1/CSPG4/NTRK2/PARP9/FYN/DSTYK/PEAK…	99
	BP	GO:0050954	sensory perception of mechanical stimulus	52/3670	173/18866	0.000524632	0.0150847	0.0126625	SOBP/KCNQ1/MYH14/TFAP2A/LRIG1/SLITRK6/COL4A3/HOMER2/ROR1/FZD4/RAB3A/COL1A1/TRIOBP/TUB/MYO6/MYO1A/GSDME/ESPN/EPS8L2/MBP/CACNB3/PSAP/MKKS/BACE1/BIRC5/NAV2/NDUFB9/SPRY2/PJVK/CDH23/CACNA1D/FGFR1/CXCR4/SERPINE2/FYN/GET1/ASIC3/WFS1/LHFPL5/THRB/TMPRSS3/RPL38/ICAM1/MYO7A/TMEM120A/GABRB3/DCDC2/ADGRV1/PGAP1/USP53/COCH/CEMIP	52
	BP	GO:0007179	transforming growth factor beta receptor signaling pathway	59/3670	202/18866	0.000524698	0.0150847	0.0126625	CHST11/PRDM16/VASN/TGFB2/HTRA1/ZMIZ1/ITGA3/ENG/SMAD4/THBS1/EMILIN1/CGN/TGFBR1/VEPH1/LTBP4/PEG10/FOXH1/LTBP2/SMAD7/ZEB1/LPXN/TGFB3/SMAD3/FBN1/ONECUT2/SPRED1/FERMT2/HIPK2/LTBP1/SDCBP/SMAD1/TGFBR3/GLG1/SPRY1/ACVR1/DAB2/FNTA/SKI/FOLR1/PPM1A/LTBP3/TGFB1/SPRY2/ZFYVE9/NPNT/HSP90AB1/CD109/TWSG1/LEMD3/CITED2/EID2/CDKN1C/SKIL/EP300/ARHGEF18/ID1/PARD6A/NREP/JUN	59
	BP	GO:0009746	response to hexose	59/3670	202/18866	0.000524698	0.0150847	0.0126625	EIF2B2/PTPRN2/SLC26A6/ADCY5/HIF1A/GAS6/LRP1/RAC1/THBS1/PPARGC1A/SRI/BAIAP3/GATA4/COL4A3/EGR1/LDHA/OXCT1/SLC39A14/HLA-DRB1/XBP1/AACS/JAGN1/PRKACA/LRP5/UNC13B/SARM1/MLXIPL/NR1D1/GLUL/SERPINF1/NME2/GCLM/RAB11FIP2/BRSK2/NME1/TCF7L2/HMGN3/FKBP1B/GIPR/STX4/RAB11FIP5/CYBA/HMGCR/CCN2/VAMP2/GJD3/WDR35/SYBU/NAMPT/LGALS1/ICAM1/IRS2/PPP3CA/HNF4A/PCK1/PRKCE/GJA1/ZNF236/ERN1	59
	BP	GO:0021700	developmental maturation	79/3670	287/18866	0.000527887	0.0150881	0.0126654	SLC26A6/HIF1A/NFIA/TGFB2/FZD5/ALDH1A2/PPARG/FAM20C/CLN5/C3/DISC1/BAIAP3/SEMA4D/XBP1/MYO5A/TRIP13/FAT4/SIRT2/NRCAM/YWHAZ/PRKACA/DDIT3/CLSTN1/PABPC1L/RERE/RAB3A/DLG4/CDC20/GATA3/UNC13B/DAB2IP/NTN4/PLXNB1/ID2/BCL11A/PDE3A/APP/NPR2/SCARF1/RFLNA/GDF11/ADGRL1/B4GALT6/CDH3/MECP2/STXBP1/MTOR/ANAPC2/BHLHA15/DCHS1/B4GALT5/FGFR1/FBXO5/AURKA/BRD1/PCSK4/UNC13A/MAP3K13/SYBU/VEGFA/RUNX2/SPINK1/XYLT1/BFSP1/AXL/R…	79
	BP	GO:0035904	aorta development	23/3670	60/18866	0.000529462	0.0150881	0.0126654	PRICKLE1/TGFB2/ENG/LRP1/NDST1/FOXH1/AP2B1/SUFU/ROBO1/PKD2/PLXND1/LTBP1/MYH10/PROX1/LOXL1/NOTCH1/PRDM1/JAG1/ADAMTS9/MYLK/HECTD1/NKX3-1/ADAMTS6	23
	BP	GO:0097755	positive regulation of blood vessel diameter	23/3670	60/18866	0.000529462	0.0150881	0.0126654	PTPRM/ADRB2/PTAFR/ADORA1/ADM/GCH1/SCPEP1/SOD2/BBS2/AGT/MKKS/ITGA1/DOCK4/ADORA2A/BDKRB2/EGFR/ARHGAP42/HMOX1/DOCK5/BMPR2/ADORA2B/PRKG1/GJA1	23
	BP	GO:0050891	multicellular organismal water homeostasis	26/3670	71/18866	0.000543711	0.0154041	0.0129306	CLDN4/AQP3/ADCY5/MET/SFN/LSR/PRKAR2B/ADCY9/PRKACA/AQP1/FA2H/HYAL2/RAB11FIP2/GRHL1/CLDN1/SCNN1A/ADCY1/ADCY4/PRKACB/ADCY3/WFS1/CYP4F12/AKR1B1/ADCY7/AKAP11/CYP26B1	26
	BP	GO:0061180	mammary gland epithelium development	26/3670	71/18866	0.000543711	0.0154041	0.0129306	ETV5/HIF1A/PTCH1/FGFR2/TBX3/CSF1/EPHA2/MST1L/ELF5/WNT3/VDR/ROBO1/LRP5/GATA3/AKT1/ATP2C2/ID2/WNT4/MST1/GLI2/IQGAP3/LBH/LATS1/CEBPB/LRP6/SMO	26
	BP	GO:0005996	monosaccharide metabolic process	81/3670	296/18866	0.000549953	0.0155358	0.0130411	OAS1/FUT6/ALDH1A1/CHST15/H6PD/IGFBP4/SIRT7/RORC/CYB5R3/PPARGC1A/RORA/SLC39A14/PGD/SLC35A2/FUT4/KAT2A/CYB5A/HK2/SLC23A2/LRP5/AKT1/UGT1A8/KAT2B/UGT1A9/UGT1A3/UGT1A7/UGT1A5/UGT1A4/FGGY/UGT1A10/MAN2B1/SLC25A10/UGT1A1/FAM3C/UGT1A6/FUCA1/FABP5/SORBS1/TPI1/WDTC1/MST1/FUOM/GLYCTK/GAPDH/SLC2A1/MTOR/PHKG2/CRY1/ACACB/HKDC1/FBP1/XYLB/MAN2B2/ALDOA/NPY1R/PMM1/SLC37A4/PPP1R3E/SOGA1/DGAT2/LEPR/SLC35B4/PFKFB4/CRE…	81
	BP	GO:0022409	positive regulation of cell-cell adhesion	77/3670	279/18866	0.000566379	0.0159508	0.0133895	PTPRU/DOCK8/KIF26B/HLA-G/ZMIZ1/RAC1/PODXL/PLPP3/HLA-DMB/ITGB2/PTAFR/CD74/VAV1/CORO1A/MYB/HSPD1/FUT4/CD27/FUT3/LYN/XBP1/CYLD/SMAD7/EGR3/PIK3R1/TNFSF4/GATA3/AKT1/BCL6/IL18/SYK/RASGRP1/IL23A/IL7/IL6ST/CD81/KIFAP3/ZBTB7B/IL27RA/ZBTB1/CCDC88B/MALT1/BCL10/NFKBID/RUNX1/CSK/ITPKB/NFKBIZ/GLI2/HSPH1/SHH/GLI3/HLA-E/VSIR/DPP4/PYCARD/CD55/BTN2A2/FYN/LGALS1/CITED2/ANK3/DUSP10/TNFSF9/PLAUR/ICAM1/CD160/ITGA6/JAK…	77
	BP	GO:0002065	columnar/cuboidal epithelial cell differentiation	39/3670	121/18866	0.000567958	0.0159508	0.0133895	SPDEF/CDX2/HIF1A/BMP4/FGFR2/FAM20C/RXRA/GATA4/SLITRK6/ESRP1/CDK6/ABL1/DLL1/TRIOBP/SLC4A7/MYO6/SAV1/TMEM231/ARNTL/PROX1/IL6ST/PTK6/B9D1/WNT4/JAG2/NOTCH1/FGFR1/PRDM1/JAG1/RARB/PAX6/LHFPL5/CEBPB/MYO7A/SMO/HNF4A/AGR2/WDPCP/TYMS	39
	BP	GO:0071322	cellular response to carbohydrate stimulus	45/3670	145/18866	0.000569555	0.0159508	0.0133895	PTPRN2/SLC26A6/ADCY5/HIF1A/GAS6/LRP1/CALCRL/RAC1/PPARGC1A/SRI/BAIAP3/GATA4/OXCT1/SLC39A14/HLA-DRB1/XBP1/AACS/JAGN1/PRKACA/LRP5/UNC13B/MLXIPL/NR1D1/SERPINF1/NME2/GCLM/RAB11FIP2/BRSK2/NME1/HMGN3/FKBP1B/STX4/RAB11FIP5/CYBA/HMGCR/WDR35/SYBU/LGALS1/ICAM1/IRS2/PPP3CA/PCK1/PRKCE/ZNF236/ERN1	45
	BP	GO:0050679	positive regulation of epithelial cell proliferation	61/3670	211/18866	0.000571352	0.0159553	0.0133933	PGF/HIF1A/PPP1R16B/HTRA1/BMP4/FGFR2/FGFBP1/TGFBR1/MST1L/OSR1/FZD7/XBP1/TNFSF12/NRP1/ERBB2/LAMB1/TLR4/EGR3/ZNF304/AKT1/PRKD1/GLUL/PROX1/NME2/ESRP2/CDH3/MST1/NRARP/CLDN1/NME1/TCF7L2/MTOR/SHH/CYBA/LAMC1/IQGAP3/NRP2/NOTCH1/EGFR/NR4A1/FGFR1/ARNT/VEGFA/FGF9/HMOX1/TNFAIP3/NOTCH2/ITGB3/BMPR2/EGFL7/AKT3/SMO/B4GALT1/ID1/TGFA/PLXNB3/DYSF/JUN/MDK/JCAD/FGF2	61
	BP	GO:0042593	glucose homeostasis	69/3670	245/18866	0.000583912	0.0162594	0.0136486	PTPRN2/ADCY5/HIF1A/OAS1/PTCH1/GAS6/LRP1/RAC1/PPARG/BACE2/PPARGC1A/SRI/BAIAP3/GATA4/OXCT1/SLC39A14/KLF15/CRY2/HLA-DRB1/XBP1/AACS/JAGN1/HK2/PRKACA/LRP5/PIK3R1/UNC13B/AKT1/MCU/MLXIPL/NR1D1/PRCP/SERPINF1/ERO1B/SESN3/NME2/FABP5/GCLM/RAB11FIP2/BRSK2/NME1/TCF7L2/HMGN3/FKBP1B/BHLHA15/STX4/RAB11FIP5/CYBA/CRY1/HMGCR/HKDC1/NUCKS1/WDR35/SYBU/FOXA3/LGALS1/PAX6/WFS1/LEPR/ICAM1/HNF1A/NMB/IRS2/PPP3CA/HNF4A/PCK1/…	69
	BP	GO:0034284	response to monosaccharide	60/3670	207/18866	0.000586478	0.0162844	0.0136695	EIF2B2/PTPRN2/SLC26A6/ADCY5/HIF1A/GAS6/CAT/LRP1/RAC1/THBS1/PPARGC1A/SRI/BAIAP3/GATA4/COL4A3/EGR1/LDHA/OXCT1/SLC39A14/HLA-DRB1/XBP1/AACS/JAGN1/PRKACA/LRP5/UNC13B/SARM1/MLXIPL/NR1D1/GLUL/SERPINF1/NME2/GCLM/RAB11FIP2/BRSK2/NME1/TCF7L2/HMGN3/FKBP1B/GIPR/STX4/RAB11FIP5/CYBA/HMGCR/CCN2/VAMP2/GJD3/WDR35/SYBU/NAMPT/LGALS1/ICAM1/IRS2/PPP3CA/HNF4A/PCK1/PRKCE/GJA1/ZNF236/ERN1	60
	BP	GO:0001885	endothelial cell development	24/3670	64/18866	0.000588839	0.0163035	0.0136856	PPP1R16B/MET/PTPRS/ENG/HEG1/EZR/CLIC4/MSN/RAPGEF1/ARHGEF26/NOTCH4/CLDN1/RAP1A/S1PR3/CLDN3/PROC/S1PR2/GSTM3/VEGFA/ICAM1/RAPGEF2/ID1/RDX/ROCK1	24
	BP	GO:0043583	ear development	64/3670	224/18866	0.000599416	0.0164764	0.0138307	EPHB2/TGFB2/SOBP/KCNQ1/TSHZ1/SHROOM2/BMP4/FGFR2/TFAP2A/LRIG1/SLITRK6/BDNF/ESRP1/OSR1/ROR1/EPHA4/MKS1/ZEB1/MAPKAPK2/FAT4/TGFB3/LRIG3/GATA3/ECE1/DLL1/TRIOBP/SLC4A7/STRA6/MYO6/TRIP11/PROX1/RPGRIP1L/GSDME/TTC39C/LRP10/FZD2/PSAP/OTX1/GLI2/PAX8/JAG2/DCHS1/SHH/GLI3/SPRY2/CDH23/NOTCH1/FGFR1/CEBPD/LGR5/INSIG1/FREM2/JAG1/GET1/FGF9/ALDH1A3/LHFPL5/RPL38/MYO7A/GABRB3/EDN1/ADGRV1/WDPCP/FZD6	64
	BP	GO:0060349	bone morphogenesis	32/3670	94/18866	0.000600156	0.0164764	0.0138307	BMP4/FGFR2/AXIN2/TFAP2A/CSGALNACT1/FGF18/ANXA6/TGFB3/LRP5/BMPR1B/COL1A1/POC1A/CHSY1/TRIP11/GLG1/MEGF8/SKI/GLI3/LTBP3/RAB23/INSIG1/RUNX2/RARB/MEF2D/BMPR2/MMP14/LRP6/FOXN3/FGFR3/SERPINH1/CYP26B1/COL27A1	32
	BP	GO:1901264	carbohydrate derivative transport	32/3670	94/18866	0.000600156	0.0164764	0.0138307	VLDLR/SLC28A3/ADORA1/NPC2/SLC35A2/PLA2G10/SLC35A5/SLC25A42/VAMP8/SLC35B1/SLC25A43/SLC35E3/SLC35C1/SLC25A44/PSAP/SLC25A25/SLC50A1/SLC5A1/CYBA/SLC37A4/SLC29A2/SYTL2/SLC35B4/ABCD1/SLC25A6/AGR2/RSC1A1/PRKCE/SLC29A4/SLC25A21/SLC25A45/GJA1	32
	BP	GO:0014706	striated muscle tissue development	102/3670	389/18866	0.00061315	0.0167859	0.0140905	NR2F2/TGFB2/MYH14/BMP4/ALDH1A2/ENG/DSP/SMAD4/FGFR2/RXRA/FLNB/TBX3/HEG1/BTG2/GPC1/DKK1/MYH11/GATA4/TGFBR1/MEIS1/EGR1/FOXH1/NEBL/XK/MYOM2/FZD7/KAT2A/SMAD7/MAPK11/CFL2/SIRT2/EGR2/ARID1A/SMAD3/ZBTB18/TLL2/PPP1R13L/DLL1/KLHL41/DSG2/EEF2/UBE4B/SAV1/MYH10/SGCB/ARNTL/SAP30/PROX1/ID2/FHOD3/DIPK2A/SELENON/GPCPD1/CACYBP/SMAD1/AGT/IFRD1/TGFBR3/LUC7L/ISL1/ERBB3/ACVR1/EGLN1/CXADR/SKI/MTOR/NIBAN2/UQCC2/SHH/TGFB…	102
	BP	GO:0014020	primary neural tube formation	33/3670	98/18866	0.000619473	0.0169114	0.0141959	FZD1/PRICKLE1/HIF1A/TGFB2/PTCH1/BMP4/DLC1/SPINT2/MKS1/LUZP1/KAT2A/COBL/ADM/ARID1A/SUFU/PRKACA/ABL1/BCL10/SPINT1/CC2D2A/MTHFR/FZD2/SKI/LMO4/FOLR1/PHACTR4/TGFB1/KDM6A/PRKACB/LRP6/ARHGAP35/STIL/FZD6	33
	BP	GO:0050863	regulation of T cell activation	89/3670	332/18866	0.00062579	0.0170362	0.0143006	DOCK8/TMEM131L/BMP4/HLA-G/ZMIZ1/RAC1/DTX1/HLA-DMB/TNFRSF21/CD74/PRNP/VAV1/CORO1A/MYB/HSPD1/RAC2/CD27/HLA-DRB1/LYN/XBP1/KAT2A/CYLD/SMAD7/ZEB1/ERBB2/EGR3/PIK3R1/TNFSF4/GATA3/ABL1/AKT1/BCL6/IL18/SYK/LGALS3/RASGRP1/IL23A/IL7/IL6ST/PDE5A/CD81/ZBTB7B/IL27RA/ZBTB1/CCDC88B/CAMK4/MALT1/BCL10/NFKBID/RUNX1/CSK/ITPKB/TNFRSF1B/NFKBIZ/NRARP/GLI2/ZC3H12A/ADORA2A/HSPH1/SHH/GLI3/HLA-E/VSIR/DPP4/PYCARD/CD55/BTN2A2…	89
	BP	GO:0050651	dermatan sulfate proteoglycan biosynthetic process	9/3670	15/18866	0.000630123	0.0171064	0.0143595	CSGALNACT1/DSE/UST/CSGALNACT2/VCAN/CHST14/CSPG4/CHST12/DSEL	9
	BP	GO:0010639	negative regulation of organelle organization	108/3670	416/18866	0.000634909	0.0171417	0.0143892	IQANK1/TACSTD2/VILL/MET/TBC1D4/BMP4/VIL1/SMAD4/SDR16C5/CIB1/DLC1/PPARGC1A/HMGA1/KLHL22/CORO1A/H3-3B/H1-0/KAT2A/TINF2/SNCA/TMSB10/WASF2/TRIP13/CAPZB/DUSP1/MID1/FKBP4/CDC20/PHF2/AKT1/VAT1/KAT2B/TRIOBP/TCHP/BCL2L2/BCL2L1/SWAP70/EVI5L/MID1IP1/FHOD3/TPX2/H3-3A/PRMT6/SHANK3/BCOR/ACAA2/ESPN/HDGFL3/SCIN/CGNL1/ARHGEF2/SPTB/SMG6/ASF1A/MKKS/PINX1/SLIT2/STYXL1/SKI/TMOD2/DNMT1/ATM/SSH1/PAM16/FBXO5/TMOD1/THAP7…	108
	BP	GO:0008038	neuron recognition	20/3670	50/18866	0.000634943	0.0171417	0.0143892	EPHB2/EPHB3/CELSR3/PALLD/TNFRSF21/BDNF/EPHA4/NRP1/NRCAM/YWHAZ/ROBO1/IGSF9/APP/NPTN/MEGF8/SEMA3A/CXCR4/PCDH12/ARHGAP35/CDK5R1	20
	BP	GO:0009743	response to carbohydrate	66/3670	233/18866	0.000641175	0.0172621	0.0144903	EIF2B2/PTPRN2/SLC26A6/ADCY5/HIF1A/GAS6/CAT/LRP1/CALCRL/RAC1/THBS1/PPARGC1A/SRI/BAIAP3/GATA4/COL4A3/EGR1/LDHA/OXCT1/SLC39A14/HLA-DRB1/LYN/XBP1/AACS/JAGN1/PRKACA/LRP5/UNC13B/SARM1/MLXIPL/NR1D1/GLUL/SERPINF1/CST3/NME2/GCLM/RAB11FIP2/BRSK2/NME1/TCF7L2/HMGN3/FKBP1B/GIPR/STX4/RAB11FIP5/RAP1A/CYBA/HMGCR/CCN2/VAMP2/GJD3/WDR35/SYBU/NAMPT/LGALS1/ICAM1/MAP1B/IRS2/PPP3CA/HNF4A/ME1/PCK1/PRKCE/GJA1/ZNF236/ERN1	66
	BP	GO:0022408	negative regulation of cell-cell adhesion	56/3670	191/18866	0.000646984	0.0173677	0.0145789	EPCAM/TMEM131L/IL1RN/CDSN/AKNA/BMP4/HLA-G/PPM1F/DTX1/PODXL/TNFRSF21/CD74/CCL28/PRNP/SPINT2/HLA-DRB1/SMAD7/SH2B3/ERBB2/TNFSF4/ABL1/AKT1/BCL6/LGALS3/SWAP70/PDE5A/ZBTB7B/CD9/NFKBID/RUNX1/MBP/NRARP/NOTCH4/ZC3H12A/ADORA2A/SHH/GLI3/VSIR/TGFB1/ABAT/NOTCH1/BTN2A2/SERPINE2/IL20RB/MAPK7/JAG1/VEGFA/TWSG1/MARCHF7/CEBPB/WNK1/PRKG1/JAK3/RDX/FOXP3/MDK	56
	BP	GO:0006493	protein O-linked glycosylation	35/3670	106/18866	0.000649698	0.0173677	0.0145789	GCNT1/B3GNT3/POGLUT3/ST3GAL1/MUC6/MUC5B/GALNT10/ST3GAL4/ST6GAL1/GALNT11/GALNT18/GALNT2/ST3GAL3/GCNT4/ST6GALNAC2/GALNT4/TRAK1/SLC35C1/ST6GALNAC4/FKRP/MUC13/ST3GAL2/MUC4/B4GALT5/GXYLT2/POGLUT2/MUC3A/B3GALNT2/B3GNT7/GALNT7/GALNT9/DPM3/MUC20/FKTN/TET2	35
	BP	GO:0045637	regulation of myeloid cell differentiation	73/3670	263/18866	0.000650442	0.0173677	0.0145789	MITF/HIF1A/MEIS2/THBS1/CIB1/CSF1/CD74/TMEM64/ZFP36/ZBTB46/MEIS1/H3-3B/HLA-DRB1/HCLS1/CA2/LYN/KLF13/CDK6/TLR3/TLR4/FBN1/PIK3R1/KAT2B/DLL1/LGALS3/IL23A/CD101/ID2/TOB2/RASSF2/H3-3A/PRMT6/CAMK4/NME2/RUNX1/ITPKB/SCIN/LEO1/NME1/FAXDC2/INHA/MTOR/EIF6/TGFB1/ISG15/P4HTM/ARNT/BRD1/IRF7/CTNNBIP1/INPP5D/TESC/LIF/B2M/JAG1/H3C4/NOTCH2/LDB1/KMT2C/CEBPB/TNRC6B/TMEM178A/RB1/EP300/RBFOX2/ZFPM1/MTURN/PPARGC1B/JUN/E…	73
	BP	GO:0002088	lens development in camera-type eye	29/3670	83/18866	0.000658018	0.017522	0.0147084	SHROOM2/BMP4/EPHA2/TGFBR1/MEIS1/SLITRK6/SMAD3/SPRED1/HIPK2/GATA3/NECTIN3/TBC1D20/PROX1/SPRY1/SKI/SIX5/SPRY2/WNT2B/TMOD1/CRYGS/PDS5B/PAX6/BFSP1/CRYBG3/SKIL/NHS/HIPK1/VIM/FGF2	29
	BP	GO:0048762	mesenchymal cell differentiation	65/3670	229/18866	0.000661007	0.0175536	0.014735	SEMA4B/VASN/HIF1A/TGFB2/ADAM15/AKNA/BMP4/ALDH1A2/ENG/SMAD4/FGFR2/AXIN2/HMGA2/SEMA4D/TGFBR1/SEMA4A/OSR1/SEMA3F/SMAD7/ANXA6/NRP1/TGFB3/SMAD3/SPRED1/SEMA4G/COL1A1/GATA3/DAB2IP/SDCBP/WNT4/TRIM62/TGFBR3/ISL1/GLIPR2/SPRY1/ACVR1/NOTCH4/DAB2/PHLDB1/TCF7L2/PDCD4/MTOR/FOLR1/SEMA3A/PHACTR4/SHH/TGFB1/SPRY2/NRP2/NOTCH1/ELL3/FGFR1/AMER1/S100A4/JAG1/SEMA3E/FAM172A/EFNA1/SNAI1/LRP6/KBTBD8/SMO/EDN1/EZH2/MDK	65
	BP	GO:0035264	multicellular organism growth	46/3670	150/18866	0.000664194	0.0175903	0.0147657	PTCH1/VIL1/TNS2/ADRB2/CSF1/HEG1/EZR/SLITRK6/H3-3B/CLIC4/FTO/KAT2A/LGMN/PPP1R13L/APP/H3-3A/ADARB1/BBS2/ARID5B/ATRN/SGPL1/TARBP2/WDTC1/MKKS/STC2/SLC25A25/SELENOM/MTOR/UNC79/STK40/RAI1/ATM/SH3PXD2B/PLAG1/KDM6A/ANKRD11/NPY1R/PKDCC/RARB/NOTCH2/EP300/SMO/PLEKHA1/STIL/ATRX/TNKS2	46
	BP	GO:0090314	positive regulation of protein targeting to membrane	14/3670	30/18866	0.000667518	0.0175903	0.0147657	CIB1/ITGB2/PRNP/ERBB2/CACNB3/FYN/ANK3/STOM/TCAF1/TCAF2/MTCL1/CDK5R1/C2CD5/CEMIP	14
	BP	GO:0016101	diterpenoid metabolic process	37/3670	114/18866	0.000669607	0.0175903	0.0147657	ALDH1A1/CYP2W1/CYP2S1/ALDH1A2/LRP8/LRP1/SDR16C5/GPC1/RETSAT/SDC3/RDH11/AKR1C4/GPC4/CYP1B1/UGT1A8/UGT1A9/UGT1A3/UGT1A7/STRA6/AKR1B10/DGAT1/CYP4V2/UGT1A1/SCPEP1/EGFR/ALDH1A3/DGAT2/CYP3A5/RDH16/AKR1B1/ADH1C/RDH5/LRAT/RARRES2/SDC2/CYP26B1/LIPE	37
	BP	GO:0032411	positive regulation of transporter activity	37/3670	114/18866	0.000669607	0.0175903	0.0147657	EPHB2/ADRB2/PTAFR/STAC/GLRX/DMD/SGK1/WNK4/STIMATE/NTSR1/HSPA2/PKD2/WNK2/STIM2/CTSS/SHANK3/SGK2/CACNB3/ATP2A1/RNF207/S100A1/AKAP6/TESC/PLCG2/NOS1AP/CRACR2A/CACNB2/ANK3/CACNA2D1/TCAF1/AKAP9/WNK1/ATP1B3/HAP1/CACNG4/SYNGR3/ARC	37
	BP	GO:0031331	positive regulation of cellular catabolic process	102/3670	390/18866	0.000674215	0.0176637	0.0148274	PRICKLE1/HIF1A/ADRB2/EPM2A/LRP1/TRIB2/DISC1/EZR/PIM2/SH3BP4/BTG2/SLC4A4/CTSC/PRR5L/ZFP36/CALCOCO2/FTO/ZFAND2A/RNF217/SMAD7/SNCA/STING1/SIRT2/ELAPOR1/HK2/CDC20/FAM122A/AKT1/DAB2IP/PSMC4/MLXIPL/AADAC/ZER1/PRKD1/TRIM8/CD81/APP/SESN3/MSN/VPS13D/ATXN3/TOB1/HSPB8/PIP4K2A/PIK3CB/TRIM22/FBXL5/TNFRSF1B/EDEM1/DET1/RNFT1/HERPUD1/TFEB/SPTLC2/DAB2/PAFAH1B2/ZC3H12A/MFN2/TRIM65/PHKG2/PRXL2C/UQCC2/PLK2/DAGLB/HNR…	102
	BP	GO:1903034	regulation of response to wounding	54/3670	183/18866	0.000676582	0.0176782	0.0148395	EPHB2/CLDN4/PTPRS/VIL1/TSPAN8/LRP1/KREMEN1/THBS1/PLPP3/ANXA2/PLAT/EPHA4/PLA2G4A/LYN/XBP1/THBD/SH2B3/SMAD3/TLR4/RAB3A/SYK/DUOX1/CD9/WNT4/SCARF1/CLDN1/SLC12A2/F2R/FKBP1B/MTOR/DUOX2/PROS1/ABAT/HMGCR/CXCR4/CLDN3/SERPINE2/PROC/CD109/MYLK/TNFAIP3/DUSP10/F12/PLAUR/HPSE/KIAA0319/TNFRSF12A/PRKG1/EDN1/SERPINF2/PRKCE/MDK/GJA1/FGF2	54
	BP	GO:0010811	positive regulation of cell-substrate adhesion	39/3670	122/18866	0.000680411	0.0176849	0.0148452	S100A10/ITGA3/PPM1F/RAC1/CIB1/DISC1/CSF1/CCN1/EMILIN1/CCL28/JUP/RSU1/CCDC80/NRP1/CDK6/SMAD3/ABL1/TRIOBP/COL16A1/WNT4/UNC13D/ITGA5/UTRN/NINJ1/EPHA1/NEDD9/PLEKHA2/FLNA/NPNT/VEGFA/DOCK5/PTPRJ/DOCK1/ITGA6/AGR2/PRKCE/SPOCK2/ROCK1/MDK	39
	BP	GO:0045665	negative regulation of neuron differentiation	64/3670	225/18866	0.000681184	0.0176849	0.0148452	EPHB2/SEMA4B/NR2F1/LPAR1/PTPRS/LRP1/DTX1/KREMEN1/PMP22/CIB1/PTPRG/DKK1/SEMA4D/DNM3/MEIS1/SEMA4A/PBX1/EPHA4/WNT3/SEMA3F/NRP1/FKBP4/SEMA4G/DLL1/ZHX2/DIXDC1/ID2/BCL11A/APP/GDF11/IFRD1/ISL1/FUOM/SLIT2/NGEF/SEMA3A/PLK2/ITM2C/SHH/GLI3/NOTCH1/SRGAP2C/REST/NOTCH3/B2M/JAG1/SEMA3E/MAP2/EFNA1/LGALS1/PAX6/THRB/RAB29/KIAA0319/TBX6/RAPGEF2/ID1/PPP3CA/CDK5R1/GPR37L1/PLXNA3/VIM/MINAR1/TRIM46	64
	BP	GO:0046718	viral entry into host cell	42/3670	134/18866	0.000682283	0.0176849	0.0148452	GAS6/TRIM31/EPHA2/NPC1/CD74/NECTIN4/HLA-DRB1/ITGB7/WWP2/ITGB6/HYAL2/CLDN9/TRIM10/TRIM8/CD81/CTSL/VAMP8/TRIM62/ITGA5/TRIM22/PPIA/CLDN1/CXADR/PHB/DPP4/GRK2/EGFR/TRIM6/CXCR4/CD55/LGALS1/SIVA1/ITGB3/TMPRSS2/ICAM1/AXL/MID2/IFITM1/HYAL3/CDK1/CR2/PIKFYVE	42
	BP	GO:0018209	peptidyl-serine modification	89/3670	333/18866	0.000693745	0.0179343	0.0150545	POGLUT3/GAS6/PRKCH/PPM1F/CAPRIN2/HMGA2/MAST4/DKK1/TGFBR1/DMD/BDNF/GALNT2/SGK1/HCLS1/SMAD7/SNCA/MAPKAPK2/PRKACA/MAPKAP1/HIPK2/DYRK3/AKT1/SYK/MLXIPL/PRKD1/APP/RASSF2/GALNT4/CAMK4/STK38L/SGK2/MARK2/BRSK2/MST1/VRK2/SH2D3A/MTOR/PLK2/TGFB1/MAST2/GRK2/ATM/SPRY2/BDKRB2/EGFR/TRIM6/POGLUT2/EIF2AK3/NTRK2/AURKA/NEK6/MAPK7/DYRK1A/MAST3/LIF/PKD1/HSP90AB1/MAP3K13/VEGFA/LATS1/PLCL2/RPS6KA5/TSSK2/AURKB/CSNK1G2/TT…	89
	BP	GO:0009187	cyclic nucleotide metabolic process	17/3670	40/18866	0.000703491	0.0180903	0.0151855	PDE9A/ADCY5/PDE4C/EPHA2/GUCY1B1/RORA/ADCY9/PDE4B/PDE5A/NPR2/ADCY1/PDE8B/ADCY4/PDE7B/ADCY3/GUCY2C/ADCY7	17
	BP	GO:1902991	regulation of amyloid precursor protein catabolic process	17/3670	40/18866	0.000703491	0.0180903	0.0151855	TMED10/PRNP/EPHA4/LYN/GGA3/APP/BIN1/NTRK2/SORL1/UNC13A/GSAP/EFNA1/HAP1/SLC2A13/EFNA3/ROCK1/ABCA2	17
	BP	GO:0050678	regulation of epithelial cell proliferation	103/3670	395/18866	0.00071095	0.0181563	0.0152408	PGF/NR2F2/TACSTD2/HIF1A/TGFB2/PPP1R16B/HTRA1/PTCH1/PTPRM/SFN/BMP4/ALDH1A2/FGFR2/PPARG/VASH1/THBS1/FGFBP1/TGFBR1/ZFP36/MST1L/COL4A3/OSR1/FZD7/XBP1/TINF2/TNFSF12/NRP1/CDK6/VDR/ERBB2/MTSS1/SMAD3/LAMB1/TLR4/ROBO1/EGR3/ZNF304/GATA3/AKT1/DAB2IP/NR1D1/SAV1/PRKD1/GLUL/KLF9/NLRC3/PROX1/SERPINF1/NME2/ESRP2/TGFBR3/CDH3/ISL1/FMC1/ERRFI1/MST1/IFT52/NRARP/CLDN1/NME1/TCF7L2/MTOR/SHH/TGFB1/CYBA/LAMC1/IQGAP3/NRP2…	103
	BP	GO:0050673	epithelial cell proliferation	116/3670	453/18866	0.000711091	0.0181563	0.0152408	PGF/NR2F2/TACSTD2/HIF1A/TGFB2/PPP1R16B/HTRA1/PTCH1/PTPRM/SFN/BMP4/IGFBP4/ALDH1A2/FGFR2/SDR16C5/PPARG/VASH1/THBS1/FGFBP1/EPHA2/TGFBR1/ZFP36/MST1L/COL4A3/OSR1/FZD7/XBP1/TINF2/TNFSF12/NRP1/CDK6/VDR/ERBB2/MTSS1/SMAD3/LAMB1/TLR4/ROBO1/EGR3/ZNF304/GATA3/AKT1/DAB2IP/NR1D1/BCL2L2/SAV1/PRKD1/GLUL/KLF9/NLRC3/PROX1/SERPINF1/ID2/NME2/ESRP2/TGFBR3/CDH3/LGR4/ISL1/FMC1/ERRFI1/MST1/IFT52/NRARP/CLDN1/NME1/CCN3/TC…	116
	BP	GO:0001843	neural tube closure	31/3670	91/18866	0.000715371	0.0181563	0.0152408	FZD1/PRICKLE1/TGFB2/PTCH1/BMP4/DLC1/SPINT2/MKS1/KAT2A/COBL/ADM/ARID1A/SUFU/PRKACA/ABL1/BCL10/SPINT1/CC2D2A/MTHFR/FZD2/SKI/LMO4/FOLR1/PHACTR4/TGFB1/KDM6A/PRKACB/LRP6/ARHGAP35/STIL/FZD6	31
	BP	GO:0045682	regulation of epidermis development	31/3670	91/18866	0.000715371	0.0181563	0.0152408	MACROH2A2/AQP3/TGFB2/PTCH1/SFN/CDSN/BMP4/PRKCH/SMAD4/CTSK/ZFP36/ESRP1/VDR/DLL1/CTSL/NME2/KRT17/RUNX1/CDH3/GRHL1/ERRFI1/KRT10/NOTCH1/CD109/SGPP1/TRIM16/PTCH2/HPSE/SMO/EZH2/ROCK1	31
	BP	GO:0045921	positive regulation of exocytosis	31/3670	91/18866	0.000715371	0.0181563	0.0152408	CADPS2/SCAMP5/ITGB2/PTAFR/SNCA/SYT1/SNF8/RAB3A/UNC13B/SYK/RAB2B/SDCBP/VAMP8/CACNA1G/UNC13D/ATP13A2/HGS/NCS1/STXBP1/STX4/RAB27B/SNX4/CACNA1D/STXBP5/RAB27A/DOC2B/CACNB2/STAM/ADORA2B/HYAL3/STX1A	31
	BP	GO:0046885	regulation of hormone biosynthetic process	10/3670	18/18866	0.000719322	0.0181619	0.0152456	HIF1A/H6PD/PPARGC1A/EGR1/ADM/WNT4/STC2/ARNT/REST/CLCN2	10
	BP	GO:0052695	cellular glucuronidation	10/3670	18/18866	0.000719322	0.0181619	0.0152456	UGT1A8/UGT1A9/UGT1A3/UGT1A7/UGT1A5/UGT1A4/UGT1A10/UGT1A1/UGT1A6/PRKCE	10
	BP	GO:0010749	regulation of nitric oxide mediated signal transduction	7/3670	10/18866	0.000721532	0.0181707	0.0152529	THBS1/PDE5A/EGFR/NOS1AP/VEGFA/SPINK1/ATP2B4	7
	BP	GO:0043406	positive regulation of MAP kinase activity	73/3670	264/18866	0.000730746	0.0183553	0.0154079	FZD8/LPAR1/PDGFC/MST1R/FZD5/BMP4/PDGFD/ERN2/IRAK2/THBS1/TPD52L1/CD74/ADORA1/DKK1/ARHGEF5/TGFBR1/FGF18/MAP3K3/FZD4/EPHA4/CXCL17/MAPK11/MAPKAPK2/TGFB3/ERBB2/TLR4/ROBO1/TLR6/DAB2IP/SYK/FGD2/RASGRP1/PDE5A/CD81/SASH1/MAP3K20/RAPGEF1/AGT/GADD45B/MAP3K4/PIK3CB/CSK/PEA15/MDFIC/ITGA1/F2R/TGFB1/IQGAP3/EGFR/FGFR1/CXCR4/CSPG4/MAP3K6/S1PR2/MAP3K13/VEGFA/MAP3K1/TNFRSF11A/ADORA2B/AJUBA/MAP4K5/EDN1/SHC2/TGFA/EZH…	73
	BP	GO:0044272	sulfur compound biosynthetic process	56/3670	192/18866	0.000743156	0.0185342	0.0155581	CHST11/SCD5/CHST15/B3GNT3/ACSL1/ST3GAL1/MPC1/ST3GAL4/ACSL5/CSGALNACT1/NDST1/DSE/UST/CSGALNACT2/VCAN/ST3GAL3/CHSY1/PPT1/PAPSS1/CHST14/PDP2/B4GALT6/GCLM/TPK1/MTRR/MTHFR/CHAC2/NDST2/GSTA1/APIP/PDPR/ST3GAL6/ACSL4/CBS/ACSF3/CHAC1/ST3GAL2/B4GALT5/ACACB/CSPG4/ELOVL5/GGCT/CHST12/MTR/GSTM3/CHPF/GSTM4/XYLT1/SLC26A2/OPLAH/B3GNT7/ACSS1/DSEL/SLC26A1/CHST7/B4GALT1	56
	BP	GO:0006979	response to oxidative stress	117/3670	458/18866	0.000743457	0.0185342	0.0155581	FZD1/ETV5/FBLN5/HIF1A/MET/ERO1A/GPX8/PDGFD/CAT/PTGS1/PPARGC1A/GUCY1B1/GATA4/PRNP/PRR5L/NCF2/GPX3/MYB/LDHA/HSPD1/SCARA3/SNCA/ALDH3B1/SIRT2/DUSP1/TLR4/AQP1/SLC23A2/MAPKAP1/GCH1/GPX4/BRF2/CYP1B1/HYAL2/PKD2/COL1A1/ABL1/TLR6/AKT1/EEF2/UCP3/DUOX1/PRKD1/ARNTL/APP/SESN3/CST3/LCN2/SELENON/NME2/SOD2/SGK2/ATRN/GCLM/ANKZF1/PRDX3/MAP1LC3A/ATP13A2/PSAP/STC2/TXNRD1/FANCC/PON2/VRK2/EGLN1/NAPRT/ZC3H12A/FKBP1B/STX…	117
	BP	GO:0007254	JNK cascade	61/3670	213/18866	0.000743575	0.0185342	0.0155581	FZD8/FZD5/ERN2/IRAK2/TPD52L1/DKK1/ARHGEF5/PTGER4/FZD4/FZD7/EPHA4/CD27/CYLD/ZMYND11/CARD9/TLR3/TLR4/HIPK2/TLR6/AKT1/DAB2IP/SYK/FGD2/TRAF3/RASGRP1/SDCBP/TRAF4/APP/PHLPP1/SASH1/MAP3K20/RASSF2/RAPGEF1/GADD45B/MAP3K4/MDFIC/PDCD4/SH2D3A/SEMA3A/PYCARD/CCN2/TRAF5/MECOM/EGFR/MAPK8IP1/MAP3K6/MAP3K13/RAP2A/DUSP10/TNFRSF11A/PJA2/ADORA2B/MAP4K5/MTURN/EDN1/MLKL/SERPINF2/SIRPA/DUSP19/FKTN/ERN1	61
	BP	GO:0098657	import into cell	65/3670	230/18866	0.000749237	0.0186277	0.0156366	FABP3/ACSL1/SLC39A4/THBS1/ACSL5/SLC39A8/NEURL1B/PRNP/DNM3/SLC9A2/SLC27A1/SLC39A14/SNCA/WNK4/AP2B1/NTSR1/SLC27A2/SLC9A3/SLC43A2/WNK2/SLC46A1/AKT1/SLC15A2/GLUL/KCNK5/NUMB/TRPV6/SLC15A1/DNM1/AGT/SLC12A4/MAPK15/SLC12A2/SLC2A1/SLC5A1/FOLR1/OPHN1/SLC39A5/FYN/KCNJ2/SLC1A4/SLC6A6/SLC29A2/SLC9A5/ATP1A3/USP46/SLC18A2/ITGB3/CACNA2D1/SLC22A3/MX1/SLC7A2/WNK1/ATP2B4/ATP1B3/SLC36A1/CACNG4/PER2/IRS2/SYNGR3/SLC29…	65
	BP	GO:0007044	cell-substrate junction assembly	33/3670	99/18866	0.000758129	0.0187531	0.0157419	LAMC2/S100A10/LIMCH1/PPM1F/LRP1/RAC1/THBS1/DLC1/ITGB4/ACTN1/LAMB3/TLN1/RHOD/NRP1/SMAD3/FERMT2/ABL1/COL16A1/LAMA3/WNT4/ITGA5/SORBS1/LAMC1/PEAK1/VEGFA/LDB1/PTPRJ/MMP14/AJUBA/MACF1/ITGA6/WDPCP/ROCK1	33
	BP	GO:0010717	regulation of epithelial to mesenchymal transition	33/3670	99/18866	0.000758129	0.0187531	0.0157419	VASN/TGFB2/BMP4/ENG/SMAD4/AXIN2/TGFBR1/SMAD7/TGFB3/SMAD3/SPRED1/COL1A1/GATA3/DAB2IP/SDCBP/TRIM62/ISL1/GLIPR2/SPRY1/ACVR1/DAB2/PHLDB1/TCF7L2/MTOR/TGFB1/SPRY2/NOTCH1/ELL3/JAG1/EFNA1/SNAI1/EZH2/MDK	33
	BP	GO:0045604	regulation of epidermal cell differentiation	24/3670	65/18866	0.000763398	0.0188356	0.0158111	MACROH2A2/AQP3/PTCH1/SFN/CDSN/BMP4/PRKCH/CTSK/ZFP36/ESRP1/VDR/DLL1/CTSL/NME2/RUNX1/GRHL1/ERRFI1/NOTCH1/CD109/SGPP1/TRIM16/PTCH2/EZH2/ROCK1	24
	BP	GO:0051403	stress-activated MAPK cascade	78/3670	286/18866	0.000765856	0.0188486	0.015822	FZD8/TGFB2/FZD5/ERN2/IRAK2/TPD52L1/EZR/DKK1/ARHGEF5/ZFP36/PTGER4/MAP3K3/FZD4/FZD7/EPHA4/CD27/CYLD/MAPK11/MAPKAPK2/ZMYND11/CARD9/DUSP1/TLR3/TLR4/MID1/HIPK2/TLR6/AKT1/DAB2IP/SYK/NFKB1/FGD2/TRAF3/RASGRP1/SDCBP/TRAF4/APP/PHLPP1/SASH1/MAP3K20/RASSF2/RAPGEF1/AGT/GADD45B/MAP3K4/MDFIC/PDCD4/SH2D3A/ZC3H12A/SEMA3A/SCIMP/PYCARD/HMGCR/CCN2/TRAF5/MECOM/EGFR/MAPK8IP1/MAP3K6/MAP3K13/FOXM1/VEGFA/RAP2A/DUSP10/TNF…	78
	BP	GO:0008630	intrinsic apoptotic signaling pathway in response to DNA damage	34/3670	103/18866	0.000774392	0.0190106	0.015958	SFN/EPHA2/CD74/ZNF385A/FBH1/NACC2/PIK3R1/IFI16/HIPK2/ABL1/TOPORS/MOAP1/HIC1/BCL2L2/BCL2L1/TRIM32/TNFRSF1B/E2F1/TMEM109/PYCARD/ATM/ELL3/CRIP1/RAD9A/DDIAS/USP28/MARCHF7/HMOX1/SNAI1/BRCA1/SKIL/EP300/HIPK1/ATAD5	34
	BP	GO:0061041	regulation of wound healing	46/3670	151/18866	0.000777869	0.019048	0.0159894	EPHB2/CLDN4/VIL1/TSPAN8/THBS1/PLPP3/ANXA2/PLAT/PLA2G4A/LYN/XBP1/THBD/SH2B3/SMAD3/TLR4/RAB3A/SYK/DUOX1/CD9/WNT4/CLDN1/SLC12A2/F2R/MTOR/DUOX2/PROS1/ABAT/HMGCR/CXCR4/CLDN3/SERPINE2/PROC/CD109/MYLK/TNFAIP3/DUSP10/F12/PLAUR/HPSE/TNFRSF12A/PRKG1/EDN1/SERPINF2/PRKCE/GJA1/FGF2	46
	BP	GO:0070482	response to oxygen levels	103/3670	396/18866	0.000780245	0.0190583	0.0159981	PGF/LPAR1/AQP3/VASN/HIF1A/TGFB2/ADAM15/ERO1A/CAT/SMAD4/PPARG/THBS1/PPARGC1A/ITPR1/ADORA1/RORA/PLAT/OXTR/EGR1/MYB/LDHA/HSPD1/TLR2/ALDH3A1/ITPR2/CHCHD2/ADM/SIRT2/TGFB3/SMAD3/HK2/AQP1/HIPK2/ATP6V1G1/COL1A1/PSMC5/AKT1/PSMC4/PSMD3/FAM162A/UCP3/UCP2/CST3/PSMD13/ACAA2/TGFBR3/PSMB8/CACNB3/MTHFR/LIMD1/MECP2/STC2/EGLN1/SLC2A1/NPEPPS/EGLN3/MTOR/E2F1/PLOD2/PDLIM1/SLC2A8/DPP4/CPEB4/CYBA/ATM/ABAT/CCN2/ATP6V1A/…	103
	BP	GO:0044409	entry into host	45/3670	147/18866	0.000787045	0.0191764	0.0160971	MET/GAS6/TRIM31/EPHA2/NPC1/CD74/NECTIN4/HLA-DRB1/ITGB7/WWP2/ITGB6/HYAL2/CXCL8/CLDN9/TRIM10/TRIM8/CD81/CTSL/VAMP8/TRIM62/ITGA5/TRIM22/PPIA/CLDN1/CXADR/PHB/DPP4/GRK2/EGFR/TRIM6/CXCR4/CD55/CTNND1/LGALS1/SIVA1/ITGB3/TMPRSS2/ICAM1/AXL/MID2/IFITM1/HYAL3/CDK1/CR2/PIKFYVE	45
	BP	GO:0060828	regulation of canonical Wnt signaling pathway	80/3670	295/18866	0.000793206	0.0192602	0.0161675	TLE4/PTPRU/FZD1/PRICKLE1/TMEM131L/ADGRA2/IGFBP4/CAPRIN2/FGFR2/KREMEN1/AXIN2/TMEM64/DKK1/EGR1/ZNRF3/JUP/AMFR/FZD4/FZD7/MKS1/CYLD/TLE1/SMAD3/CCDC88C/DDIT3/FAM53B/CDK14/WNK2/TLE2/COL1A1/PSMC5/SOX7/DAB2IP/PSMC4/PSMD3/NFKB1/GNAQ/ARNTL/PSMD13/RAPGEF1/TBX18/CDH3/PSMB8/LGR4/ISL1/LIMD1/GID8/NRARP/LGR6/DAB2/TCF7L2/FOLR1/TLE6/SHH/GLI3/PPM1A/TGFB1/ZBED3/NOTCH1/EGFR/PSMB10/CTNND1/LGR5/AMER1/PSMD12/LATS1/FGF9/…	80
	BP	GO:0017157	regulation of exocytosis	63/3670	222/18866	0.000796764	0.0192602	0.0161675	CADPS2/SYT17/SCAMP5/STXBP6/SEPTIN1/SYT8/ITGB2/PTAFR/SEPTIN4/P2RY1/CPLANE2/BAIAP3/RAC2/VAMP1/LYN/SNCA/SYT1/SNF8/RAB3A/UNC13B/GNAI2/SYK/RAB2B/RAB8B/SDCBP/VAMP8/TRPV6/CACNA1G/UNC13D/ATP13A2/RAB33B/HGS/BACE1/NCS1/STXBP1/ADCY1/STX4/RAB27B/ADORA2A/RAP1A/SNX4/CACNA1D/VAMP2/NOTCH1/STXBP5/REST/RAB27A/DOC2B/CHRNA5/CACNB2/HMOX1/SEPTIN5/DOC2A/STAM/ADORA2B/HAP1/HYAL3/STX1A/RSC1A1/FBXL20/TRIM9/RIMS3/RAB3B	63
	BP	GO:0048846	axon extension involved in axon guidance	16/3670	37/18866	0.000798392	0.0192602	0.0161675	SEMA4B/SEMA4D/SEMA4A/WNT3/SEMA3F/NRP1/SEMA4G/SLIT2/MEGF8/SEMA3A/NRP2/SEMA3E/VEGFA/ALCAM/BMPR2/PLXNA3	16
	BP	GO:1902284	neuron projection extension involved in neuron projection guidance	16/3670	37/18866	0.000798392	0.0192602	0.0161675	SEMA4B/SEMA4D/SEMA4A/WNT3/SEMA3F/NRP1/SEMA4G/SLIT2/MEGF8/SEMA3A/NRP2/SEMA3E/VEGFA/ALCAM/BMPR2/PLXNA3	16
	BP	GO:0009799	specification of symmetry	42/3670	135/18866	0.000806954	0.0194187	0.0163006	PSKH1/HIF1A/BMP4/ALDH1A2/ENG/DYNC2H1/TBX3/GATA4/GALNT11/FOXH1/MKS1/SUFU/SMAD3/DDIT3/DNAH11/PKD2/AP1B1/DLL1/RPGRIP1L/CC2D2A/RNF207/BBS5/IFT52/ACVR1/MKKS/OFD1/MEGF8/ARL13B/FOLR1/NBL1/SHH/NOTCH1/CITED2/DISP1/LRRC6/NOTCH2/TBX6/SMO/ARL6/PCSK5/CCDC40/STIL	42
	BP	GO:0002761	regulation of myeloid leukocyte differentiation	39/3670	123/18866	0.000812097	0.0194516	0.0163282	MITF/CSF1/CD74/TMEM64/ZBTB46/HLA-DRB1/HCLS1/CA2/LYN/CDK6/TLR3/TLR4/FBN1/PIK3R1/IL23A/CD101/ID2/TOB2/RASSF2/CAMK4/NME2/RUNX1/NME1/INHA/MTOR/TGFB1/IRF7/CTNNBIP1/INPP5D/TESC/LIF/NOTCH2/CEBPB/TMEM178A/RB1/ZFPM1/PPARGC1B/JUN/KLF10	39
	BP	GO:0001704	formation of primary germ layer	40/3670	127/18866	0.000812311	0.0194516	0.0163282	COL6A1/BMP4/MMP15/ITGA3/FGFR2/ITGB2/ITGB4/EPHA2/HMGA2/DKK1/LAMB3/ELF5/FZD7/WNT3/ARID1A/SMAD3/LAMB1/DUSP1/PRKACA/COL12A1/SOX7/LAMA3/SMAD1/ITGA5/COL7A1/COL5A2/ACVR1/TXNRD1/LEO1/TBX19/FGFR1/KDM6A/TWSG1/ITGB3/SNAI1/BMPR2/MMP14/TBX6/POU5F1/GJA1	40
	BP	GO:0070085	glycosylation	73/3670	265/18866	0.000819812	0.0195831	0.0164385	FUT6/GCNT1/ST3GAL5/ST8SIA4/B3GNT3/POGLUT3/ST3GAL1/MUC6/MAN1C1/MAN1A1/MUC5B/B3GNT9/GALNT10/CLN5/ST3GAL4/ST6GALNAC6/SLC39A8/NPC1/ABO/ST6GAL1/GALNT11/GALNT18/GALNT2/EXTL3/FUT4/FUT3/ST3GAL3/MGAT2/UBE2J1/DHDDS/GCNT4/DERL3/EXT1/ST6GALNAC2/TRIP11/ST6GALNAC1/ALG8/GALNT4/TRAK1/MGAT5/B4GALT6/SLC35C1/ST6GALNAC4/MGAT4B/FUOM/ST3GAL6/FKRP/MUC13/ST3GAL2/MUC4/B4GALT5/GXYLT2/POGLUT2/MUC3A/PMM1/B3GALNT1/LMAN1/B3GA…	73
	BP	GO:0045165	cell fate commitment	76/3670	278/18866	0.000823977	0.0196344	0.0164817	MITF/NR2F2/SPDEF/SLAMF8/PTCH1/BMP4/RORC/SMAD4/FGFR2/PPARG/TBX3/DKK1/GATA4/RORA/TGFBR1/ESRP1/ELF5/FZD7/WNT3/CYLD/NRP1/SUFU/ONECUT2/GATA3/DLL1/IL23A/IL7/PROX1/CTSL/ID2/ZBTB7B/WNT4/SMAD1/TBX18/IFRD1/ISL1/ARHGEF2/ACVR1/NOTCH4/LEO1/TCF7L2/GLI2/LMO4/MTOR/JAG2/SHH/GLI3/SPRY2/TBX19/NOTCH1/WNT2B/FGFR1/SH3PXD2B/PITX1/PRDM1/NOTCH3/JAG1/RUNX2/LATS1/PAX6/NOTCH2/CEBPB/PTCH2/TBX6/SMO/ZFPM1/SOX6/POU5F1/MIAT/MGA/…	76
	BP	GO:0009749	response to glucose	57/3670	197/18866	0.00082996	0.0196577	0.0165012	EIF2B2/PTPRN2/ADCY5/HIF1A/GAS6/LRP1/RAC1/THBS1/PPARGC1A/SRI/BAIAP3/GATA4/COL4A3/EGR1/LDHA/OXCT1/SLC39A14/HLA-DRB1/XBP1/AACS/JAGN1/PRKACA/LRP5/UNC13B/SARM1/MLXIPL/NR1D1/GLUL/SERPINF1/NME2/GCLM/RAB11FIP2/BRSK2/NME1/TCF7L2/HMGN3/FKBP1B/GIPR/STX4/RAB11FIP5/CYBA/HMGCR/CCN2/VAMP2/GJD3/WDR35/SYBU/LGALS1/ICAM1/IRS2/PPP3CA/HNF4A/PCK1/PRKCE/GJA1/ZNF236/ERN1	57
	BP	GO:0048839	inner ear development	57/3670	197/18866	0.00082996	0.0196577	0.0165012	EPHB2/TGFB2/SOBP/KCNQ1/BMP4/FGFR2/TFAP2A/LRIG1/SLITRK6/BDNF/ESRP1/ROR1/EPHA4/MKS1/ZEB1/MAPKAPK2/FAT4/TGFB3/LRIG3/GATA3/DLL1/TRIOBP/SLC4A7/MYO6/TRIP11/PROX1/RPGRIP1L/GSDME/TTC39C/LRP10/FZD2/PSAP/OTX1/GLI2/PAX8/JAG2/DCHS1/SHH/GLI3/SPRY2/CDH23/NOTCH1/FGFR1/CEBPD/LGR5/INSIG1/FREM2/JAG1/GET1/FGF9/ALDH1A3/LHFPL5/MYO7A/GABRB3/ADGRV1/WDPCP/FZD6	57
	BP	GO:0071496	cellular response to external stimulus	87/3670	326/18866	0.000831006	0.0196577	0.0165012	CADPS2/AQP3/DSC2/TLR5/GAS6/SLC39A4/ENG/DAP/RAC1/PPARG/KANK2/WDR45B/CASP1/NUAK1/PTGER4/LYN/XBP1/VDR/ELAPOR1/SREBF2/TLR3/TLR4/AQP1/AOC1/FADS1/IFI16/COL1A1/AKT1/NFKB1/PRKD1/GLUL/SESN3/TMEM150C/LCN2/WNT4/BCL10/UPP1/AGT/MAP1LC3A/CACNB3/SIK2/BRSK2/LAMP2/TFEB/TNFRSF10B/SLC2A1/ZC3H12A/MTOR/BHLHA15/FOLR1/CBS/CPEB4/CYBA/EGFR/HDAC4/WNT2B/EIF2AK3/PCSK9/SLC39A5/RIPOR1/RRAGD/KCNJ2/NUDT1/RNF152/MAP3K1/CHEK1/NAM…	87
	BP	GO:0099177	regulation of trans-synaptic signaling	116/3670	455/18866	0.000844844	0.0199367	0.0167354	EPHB2/NPTXR/TPRG1L/PTPRS/ADRB2/CLSTN3/LRP8/DISC1/P2RY1/GUCY1B1/ADORA1/SIPA1L1/DKK1/BAIAP3/SYNGR1/PRNP/PLAT/MAP1A/PLCB4/OXTR/PRKAR2B/TMEM25/BDNF/CRTC1/SYNPO/EPHA4/VAMP1/CA2/KAT2A/SNCA/LAMA2/LGMN/EGR2/SYT1/NTSR1/PRKACA/CLSTN1/RAB3A/DLG4/CDC20/UNC13B/ABL1/PSMC5/SNCG/GNAI2/PTPRA/KCTD13/GLUL/APP/SHANK3/CALB2/FABP5/DNM1/AGT/NCDN/CACNB3/ACHE/MECP2/RIN1/BACE1/NCS1/EGLN1/STXBP1/SLC12A2/NPTN/F2R/MTOR/ANAPC…	116
	BP	GO:0001894	tissue homeostasis	72/3670	261/18866	0.000849243	0.0199571	0.0167526	ADRB2/MUC6/PIGR/RAC1/CTSK/CSF1/SLC39A8/TMEM64/LSR/CUBN/DMD/CORO1A/ZG16B/HOMER2/RAC2/MKS1/CA2/LAMA2/TLR4/LPCAT1/ESAM/SYK/TUB/IL7/DEF8/CTSH/FLT3LG/JAM3/BBS2/TFF1/TRIM32/PROM1/MBP/CDH3/NCDN/CSK/MKKS/CLDN1/SLC12A2/SLC2A1/CXADR/F2R/LTBP3/MUC13/MUC4/LAMC1/CDH23/CCN2/NOTCH1/EGFR/CLDN3/IL20RB/INPP5D/ANKRD11/B2M/VEGFA/TNFRSF11B/TNFAIP3/ITGB3/TNFRSF11A/PIWIL4/RB1/LCA5/AKR1B1/SMO/LRRK1/ADGRV1/PPARGC1B/EPAS1…	72
	BP	GO:0031098	stress-activated protein kinase signaling cascade	81/3670	300/18866	0.000850436	0.0199571	0.0167526	FZD8/TGFB2/FZD5/ERN2/IRAK2/TPD52L1/EZR/DKK1/ARHGEF5/ZFP36/PTGER4/MAP3K3/FZD4/FZD7/EPHA4/CD27/LYN/CYLD/MAPK11/MAPKAPK2/ZMYND11/CARD9/CCDC88C/DUSP1/TLR3/TLR4/MID1/HIPK2/TLR6/AKT1/DAB2IP/SYK/NFKB1/FGD2/TRAF3/RASGRP1/SDCBP/TRAF4/APP/PHLPP1/SASH1/MAP3K20/RASSF2/RAPGEF1/AGT/GADD45B/MAP3K4/MDFIC/PDCD4/SH2D3A/ZC3H12A/SEMA3A/SCIMP/PYCARD/HMGCR/CCN2/TRAF5/MECOM/EGFR/MAPK8IP1/MAP3K6/MAP3K13/FOXM1/VEGFA/RAP2…	81
	BP	GO:0002793	positive regulation of peptide secretion	56/3670	193/18866	0.000851854	0.0199571	0.0167526	HIF1A/TGFB2/SCAMP5/LRP1/RAC1/MYRIP/EZR/GOLPH3/ADORA1/SRI/BAIAP3/CD14/OXCT1/PTGER4/TLR2/HLA-DRB1/XBP1/AACS/TGFB3/TLR4/TNFSF4/UNC13B/SYK/MCU/GLUL/RAB8B/MYH10/FRMD4A/MYO18A/ATP13A2/ISL1/ACHE/PPIA/GAPDH/TCF7L2/ACSL4/GIPR/STX4/ADORA2A/HLA-E/TGFB1/ABAT/NLGN2/PANX1/EGFR/SORL1/ITSN1/SYBU/DOC2B/CD2AP/IRS2/PARD6A/C1QTNF3/PRKCE/GJA1/ADAM8	56
	BP	GO:0085029	extracellular matrix assembly	18/3670	44/18866	0.000854581	0.019973	0.0167659	FBLN5/GAS6/EMILIN1/MYH11/LAMB3/MFAP4/SMAD3/LAMB1/TNXB/ANTXR1/NTN4/AGT/PHLDB1/LTBP3/TGFB1/NOTCH1/THSD4/EFEMP2	18
	BP	GO:0033002	muscle cell proliferation	68/3670	244/18866	0.000867075	0.0202165	0.0169703	TGFB2/NDRG2/BMP4/PDGFD/CALCRL/FGFR2/PPARG/THBS1/RXRA/PTAFR/TGM2/PPARGC1A/TGFBR1/MEIS1/MYB/LDLRAP1/IL6R/MAPK11/TGFB3/AKT1/GNAI2/IL18/SAV1/ABCC4/ID2/DIPK2A/ADAMTS1/SOD2/SMAD1/AGT/TGFBR3/CCN3/TCF7L2/PDCD4/CXADR/MFN2/MTOR/SIX5/PHB/SHH/DNMT1/CYBA/HMGCR/NOTCH1/EGFR/HDAC4/FGFR1/TPM1/CTNNBIP1/NOTCH3/NAMPT/FGF9/MEF2D/HMOX1/TNFAIP3/RBPMS2/JARID2/AKR1B1/PRKG1/CCNB1/EDN1/IGFBP3/SERPINF2/JUN/CDK1/GJA1/FGF2/ER…	68
	BP	GO:0060606	tube closure	31/3670	92/18866	0.000880708	0.020469	0.0171822	FZD1/PRICKLE1/TGFB2/PTCH1/BMP4/DLC1/SPINT2/MKS1/KAT2A/COBL/ADM/ARID1A/SUFU/PRKACA/ABL1/BCL10/SPINT1/CC2D2A/MTHFR/FZD2/SKI/LMO4/FOLR1/PHACTR4/TGFB1/KDM6A/PRKACB/LRP6/ARHGAP35/STIL/FZD6	31
	BP	GO:0003208	cardiac ventricle morphogenesis	26/3670	73/18866	0.000882849	0.020469	0.0171822	CPE/HIF1A/TGFB2/ENG/DSP/SMAD4/FGFR2/RXRA/HEG1/GATA4/SMARCD3/TGFBR1/FOXH1/SMAD7/GATA3/PPP1R13L/UBE4B/PROX1/TGFBR3/ISL1/TGFB1/TNNT2/NOTCH1/TPM1/TNNI1/JAG1	26
	BP	GO:0032147	activation of protein kinase activity	88/3670	331/18866	0.000884203	0.020469	0.0171822	GPRC5A/LPAR1/ADCY5/TGFB2/PDGFC/BMP4/GAS6/ADRB2/ERN2/IRAK2/THBS1/CD74/ADORA1/PRNP/TGFBR1/PRKAR2B/ADCY9/MAP3K3/CXCL17/IL6R/MAPK11/MAPKAPK2/TGFB3/TLR3/PRKACA/TLR4/MAPKAP1/PILRB/ABL1/TLR6/AKT1/DAB2IP/IL18/SYK/PIBF1/IL23A/TRAF4/CD81/MAP3K20/TPX2/CCDC88A/MALT1/RAPGEF1/AGT/MARK2/GADD45B/MAP3K4/PIK3CB/PEA15/MDFIC/ITGA1/TNFRSF10B/F2R/MTOR/ADCY1/ADCY4/PHB/IQGAP3/EGFR/CXCR4/CSPG4/PRKACB/ADCY3/MAP3K6/S1PR2/M…	88
	BP	GO:1902904	negative regulation of supramolecular fiber organization	47/3670	156/18866	0.000894683	0.0206573	0.0173403	IQANK1/TACSTD2/VILL/MET/VIL1/SMAD4/CIB1/EMILIN1/DLC1/CORO1A/SNCA/TMSB10/WASF2/CAPZB/MID1/FKBP4/TRIOBP/SWAP70/MID1IP1/FHOD3/TPX2/SHANK3/HDGFL3/SCIN/CGNL1/ARHGEF2/SPTB/MKKS/SLIT2/TMOD2/SSH1/TMOD1/KATNB1/DYRK1A/MAP2/EPS8/CLIP3/SPTBN1/CAPG/TTBK2/ARHGEF18/MAP1B/KANK3/RDX/PFN4/ARPIN/CRACD	47
	BP	GO:0042558	pteridine-containing compound metabolic process	15/3670	34/18866	0.000898696	0.0206573	0.0173403	SHMT1/GCH1/PCBD1/SLC46A1/SPR/FPGS/ATIC/MTRR/MTHFR/FOLR1/DHFR2/MTR/ALDH1L2/TYMS/SLC19A1	15
	BP	GO:0048566	embryonic digestive tract development	15/3670	34/18866	0.000898696	0.0206573	0.0173403	TGFB2/ALDH1A2/FGFR2/CXCL8/STRA6/ID2/GLI2/SHH/GLI3/PKDCC/RARB/FGF9/RBPMS2/PCSK5/RARRES2	15
	BP	GO:0001837	epithelial to mesenchymal transition	46/3670	152/18866	0.000908444	0.0207952	0.0174561	VASN/HIF1A/TGFB2/ADAM15/AKNA/BMP4/ENG/SMAD4/FGFR2/AXIN2/HMGA2/TGFBR1/SMAD7/TGFB3/SMAD3/SPRED1/COL1A1/GATA3/DAB2IP/SDCBP/WNT4/TRIM62/TGFBR3/ISL1/GLIPR2/SPRY1/ACVR1/NOTCH4/DAB2/PHLDB1/TCF7L2/PDCD4/MTOR/TGFB1/SPRY2/NOTCH1/ELL3/FGFR1/S100A4/JAG1/EFNA1/SNAI1/LRP6/KBTBD8/EZH2/MDK	46
	BP	GO:0036293	response to decreased oxygen levels	97/3670	371/18866	0.000908964	0.0207952	0.0174561	PGF/AQP3/VASN/HIF1A/TGFB2/ADAM15/ERO1A/CAT/SMAD4/THBS1/PPARGC1A/ITPR1/ADORA1/RORA/PLAT/OXTR/EGR1/MYB/LDHA/HSPD1/TLR2/ALDH3A1/ITPR2/CHCHD2/ADM/SIRT2/TGFB3/SMAD3/HK2/AQP1/HIPK2/PSMC5/AKT1/PSMC4/PSMD3/FAM162A/UCP3/UCP2/CST3/PSMD13/ACAA2/TGFBR3/PSMB8/CACNB3/MTHFR/LIMD1/MECP2/STC2/EGLN1/SLC2A1/NPEPPS/EGLN3/MTOR/E2F1/PLOD2/PDLIM1/SLC2A8/DPP4/CPEB4/CYBA/ATM/ABAT/CCN2/NOP53/NOTCH1/ARNT2/PSMB10/CXCR4/CLDN…	97
	BP	GO:0006720	isoprenoid metabolic process	44/3670	144/18866	0.000932641	0.0212869	0.0178688	ALDH1A1/CYP2W1/CYP2S1/ALDH1A2/LRP8/LRP1/SDR16C5/GPC1/RETSAT/SDC3/NPC2/RDH11/AKR1C4/GPC4/CYP1B1/DHDDS/UGT1A8/UGT1A9/UGT1A3/UGT1A7/STRA6/AKR1B10/DGAT1/CYP4V2/UGT1A1/SCPEP1/PDSS1/HMGCR/EGFR/CYP2E1/LSS/ALDH1A3/IDI1/DGAT2/CYP3A5/RDH16/AKR1B1/ADH1C/RDH5/LRAT/RARRES2/SDC2/CYP26B1/LIPE	44
	BP	GO:0030324	lung development	52/3670	177/18866	0.000938868	0.021379	0.0179461	SPDEF/HS6ST1/BMP4/ALDH1A2/ITGA3/FGFR2/HEG1/FGF18/CRISPLD2/AIMP2/SIM2/TGFB3/YWHAZ/RAB3A/STRA6/SAV1/PROX1/CTSH/ESRP2/SPRY1/ERRFI1/CIC/GLI2/SHH/GLI3/STK40/LTBP3/SPRY2/CCN2/NOTCH1/EGFR/WNT2B/FGFR1/PKDCC/LIF/PKD1/VEGFA/FGF9/ATXN1L/THRB/BMPR2/MMP14/MAN1A2/EP300/PHEX/MAN2A1/ID1/CCDC40/TNC/AGR2/EPAS1/FGF2	52
	BP	GO:0006721	terpenoid metabolic process	39/3670	124/18866	0.000965738	0.0218692	0.0183576	ALDH1A1/CYP2W1/CYP2S1/ALDH1A2/LRP8/LRP1/SDR16C5/GPC1/RETSAT/SDC3/RDH11/AKR1C4/GPC4/CYP1B1/UGT1A8/UGT1A9/UGT1A3/UGT1A7/STRA6/AKR1B10/DGAT1/CYP4V2/UGT1A1/SCPEP1/EGFR/CYP2E1/LSS/ALDH1A3/DGAT2/CYP3A5/RDH16/AKR1B1/ADH1C/RDH5/LRAT/RARRES2/SDC2/CYP26B1/LIPE	39
	BP	GO:0001954	positive regulation of cell-matrix adhesion	21/3670	55/18866	0.000967128	0.0218692	0.0183576	S100A10/PPM1F/RAC1/CIB1/DISC1/CSF1/CCL28/JUP/NRP1/CDK6/SMAD3/ABL1/COL16A1/WNT4/UTRN/NINJ1/EPHA1/PLEKHA2/VEGFA/PTPRJ/ROCK1	21
	BP	GO:0008347	glial cell migration	21/3670	55/18866	0.000967128	0.0218692	0.0183576	MATN2/TGFB2/ZMIZ1/LRP1/DISC1/CSF1/P2RY1/EPHA4/IDH2/SUN2/LAMB1/DAB2IP/ADGRG1/SUN1/CD9/SYNE2/GLI3/CSPG4/SRGAP2C/MMP14/CDK5R1	21
	BP	GO:0018105	peptidyl-serine phosphorylation	83/3670	310/18866	0.0009715	0.0219172	0.0183979	GAS6/PRKCH/PPM1F/CAPRIN2/HMGA2/MAST4/DKK1/TGFBR1/DMD/BDNF/SGK1/HCLS1/SMAD7/SNCA/MAPKAPK2/PRKACA/MAPKAP1/HIPK2/DYRK3/AKT1/SYK/MLXIPL/PRKD1/APP/RASSF2/CAMK4/STK38L/SGK2/MARK2/BRSK2/MST1/VRK2/SH2D3A/MTOR/PLK2/TGFB1/MAST2/GRK2/ATM/SPRY2/BDKRB2/EGFR/TRIM6/EIF2AK3/NTRK2/AURKA/NEK6/MAPK7/DYRK1A/MAST3/LIF/PKD1/HSP90AB1/MAP3K13/VEGFA/LATS1/PLCL2/RPS6KA5/TSSK2/AURKB/CSNK1G2/TTBK2/AKT3/MKNK2/SBK1/PRKG2/TSSK…	83
	BP	GO:0042490	mechanoreceptor differentiation	24/3670	66/18866	0.000981158	0.0219825	0.0184527	BMP4/SLITRK6/BDNF/ESRP1/MKS1/FAT4/DLL1/TRIOBP/SLC4A7/MYO6/TRIP11/GSDME/FZD2/JAG2/CDH23/NOTCH1/FGFR1/NTRK2/JAG1/LHFPL5/MYO7A/GABRB3/ADGRV1/WDPCP	24
	BP	GO:0045669	positive regulation of osteoblast differentiation	24/3670	66/18866	0.000981158	0.0219825	0.0184527	BMP4/FAM20C/CCN1/CLIC1/IL6R/LRP3/LRP5/BMPR1B/ZHX3/PRKD1/IL6ST/WNT4/SMAD1/ACVR1/GLI3/FBXO5/CEBPD/CTNNBIP1/NPNT/JAG1/RUNX2/CEBPB/BMPR2/IFITM1	24
	BP	GO:0046824	positive regulation of nucleocytoplasmic transport	24/3670	66/18866	0.000981158	0.0219825	0.0184527	SFN/GAS6/JUP/HCLS1/SMAD3/RBM26/PRKACA/PIK3R1/HYAL2/ZPR1/TCF7L2/ZC3H12A/SHH/GLI3/PPM1A/TGFB1/FLNA/HSP90AB1/MAVS/SMO/ECT2/GTSE1/CDK1/CAMK1	24
	BP	GO:0021532	neural tube patterning	17/3670	41/18866	0.000986079	0.022042	0.0185027	PTCH1/DZIP1L/BMP4/MKS1/SUFU/PRKACA/RPGRIP1L/SSBP3/GLI2/ARL13B/SHH/GLI3/PRKACB/PAX6/LRP6/SMO/GORAB	17
	BP	GO:0055010	ventricular cardiac muscle tissue morphogenesis	19/3670	48/18866	0.00100084	0.0222721	0.0186958	TGFB2/ENG/DSP/SMAD4/FGFR2/RXRA/HEG1/TGFBR1/FOXH1/SMAD7/UBE4B/PROX1/TGFBR3/ISL1/TGFB1/TNNT2/NOTCH1/TPM1/TNNI1	19
	BP	GO:0008045	motor neuron axon guidance	14/3670	31/18866	0.00100094	0.0222721	0.0186958	LAMC2/RAC1/MYCBP2/RAC2/EPHA4/SEMA3F/NRP1/EGR2/ERBB2/SLIT2/CHN1/SEMA3A/ALCAM/PLXNA3	14
	BP	GO:0031110	regulation of microtubule polymerization or depolymerization	29/3670	85/18866	0.00101739	0.022499	0.0188863	MET/RAC1/CIB1/MAPRE2/MAP1A/SNCA/MID1/FKBP4/ABL1/MID1IP1/TPX2/HDGFL3/SKA3/ARHGEF2/MECP2/NIN/TOGARAM2/TOGARAM1/KATNB1/DYRK1A/SLAIN2/MAP2/MAPT/STMN3/CLIP3/TTBK2/AKAP9/MAP1B/CDK5R1	29
	BP	GO:0042692	muscle cell differentiation	101/3670	390/18866	0.00101843	0.022499	0.0188863	KRT19/BMP4/ENG/SMAD4/FGFR2/RXRA/KRT8/TBX3/DKK1/MYH11/GATA4/SMARCD3/RORA/DMD/H3-3B/CEACAM5/BDNF/NEBL/XK/FZD7/XBP1/KAT2A/MAPK11/ZEB1/CFL2/BOC/ADM/ARID1A/ABL1/AKT1/DLL1/KLHL41/QKI/MYH10/SGCB/PROX1/CD81/ID2/FHOD3/H3-3A/FLT3LG/CD9/WNT4/SELENON/SOD2/TRIM32/CACYBP/AGT/IFRD1/TARBP2/MECP2/ACVR1/ASF1A/CCN3/HIRA/PDCD4/CXADR/SKI/MTOR/BHLHA15/NIBAN2/TMOD2/BIN1/SHH/DNMT1/TGFB1/MYOF/MEF2A/TNNT2/NOTCH1/HDAC4/EHD…	101
	BP	GO:0090092	regulation of transmembrane receptor protein serine/threonine kinase signaling pathway	70/3670	254/18866	0.00102216	0.022499	0.0188863	FZD1/CHST11/PRDM16/VASN/TGFB2/HTRA1/BMP4/ITGA3/ENG/SMAD4/THBS1/CCN1/EMILIN1/DKK1/GATA4/TGFBR1/VEPH1/LTBP4/FSTL1/PEG10/SMAD7/ZEB1/TGFB3/SMAD3/FBN1/ONECUT2/SPRED1/HIPK2/ABL1/LTBP1/SDCBP/TOB1/GDF11/PELO/TGFBR3/GLG1/SPRY1/ACVR1/DAB2/CCN3/SKI/INHA/FOLR1/NBL1/SHH/PPM1A/TGFB1/SPRY2/NEO1/NOTCH1/SORL1/NPNT/HSP90AB1/CD109/TWSG1/LEMD3/FGF9/CITED2/NOTCH2/EID2/SPTBN1/BMPR2/CDKN1C/SKIL/KIAA0319/RBPMS2/EP300/TM…	70
	BP	GO:0032352	positive regulation of hormone metabolic process	8/3670	13/18866	0.00102268	0.022499	0.0188863	HIF1A/PPARGC1A/EGR1/ADM/GATA3/WNT4/PAX8/ARNT	8
	BP	GO:0032530	regulation of microvillus organization	8/3670	13/18866	0.00102268	0.022499	0.0188863	RAP1GAP/VIL1/PODXL/EZR/CDHR5/CDHR2/FSCN1/PLD1	8
	BP	GO:0007178	transmembrane receptor protein serine/threonine kinase signaling pathway	94/3670	359/18866	0.00102747	0.0225046	0.018891	FZD1/CHST11/PRDM16/VASN/TGFB2/HTRA1/BMP4/ZMIZ1/ITGA3/ENG/SMAD4/THBS1/CCN1/EMILIN1/CGN/DKK1/GATA4/TGFBR1/VEPH1/LTBP4/EGR1/FSTL1/PEG10/FOXH1/LTBP2/SMAD7/ZEB1/LPXN/TGFB3/SMAD3/FBN1/ONECUT2/SPRED1/FERMT2/BMPR1B/HIPK2/ABL1/LTBP1/SDCBP/TOB1/GDF11/SMAD1/PELO/TGFBR3/GLG1/SPRY1/ACVR1/DAB2/CCN3/FNTA/PDCD4/MEGF8/SKI/INHA/FOLR1/NBL1/SHH/PPM1A/LTBP3/TGFB1/SPRY2/NEO1/NOTCH1/SLC39A5/ZFYVE9/SORL1/NPNT/HSP90AB1/H…	94
	BP	GO:0046883	regulation of hormone secretion	73/3670	267/18866	0.00102756	0.0225046	0.018891	ADCY5/HIF1A/KCNS3/LRP1/SMAD4/RAC1/ARL2BP/MYRIP/P2RY1/ITPR1/ADORA1/SRI/BAIAP3/ICA1/MYB/OXCT1/HLA-DRB1/AACS/ITPR2/JAGN1/LRP5/MCU/NR1D1/GLUL/RAB8B/ARNTL/VAMP8/AGT/RAB11FIP3/ISL1/BRSK2/CCN3/SLC2A1/TCF7L2/HMGN3/ACSL4/PAX8/INHA/FKBP1B/GIPR/UQCC2/STX4/RAB11FIP5/RAP1A/HADH/DPP4/ABAT/SNX4/NLGN2/CACNA1D/CRY1/HMGCR/EGFR/FGFR1/ITSN1/REST/RAB11FIP1/LIF/SYBU/DOC2B/NKX3-1/NMB/SLC25A6/EDN1/PER2/IRS2/PPP3CA/STX1A…	73
	BP	GO:1903900	regulation of viral life cycle	47/3670	157/18866	0.00103995	0.022725	0.0190759	OAS1/OASL/TRIM31/HMGA2/CD74/HLA-DRB1/CHMP4C/SNF8/IFI16/CXCL8/TBC1D20/TRIM10/PROX1/TRIM8/ADARB1/TRIM32/KPNA2/TRIM62/TARBP2/TRIM22/PPIA/CHMP2B/APOBEC3B/ZC3H12A/PHB/IFI27/ISG15/NOTCH1/TRIM6/RNASEL/NUCKS1/TNIP1/FBXL2/LGALS1/STOM/BST2/TMPRSS2/RSAD2/MAVS/SLPI/APOBEC3F/MX1/MID2/IFITM1/RESF1/LAMP3/TOP2A	47
	BP	GO:0015911	long-chain fatty acid import across plasma membrane	6/3670	8/18866	0.00105146	0.022823	0.0191582	THBS1/ACSL5/SLC27A1/AKT1/SLC2A1/IRS2	6
	BP	GO:0046886	positive regulation of hormone biosynthetic process	6/3670	8/18866	0.00105146	0.022823	0.0191582	HIF1A/PPARGC1A/EGR1/ADM/WNT4/ARNT	6
	BP	GO:0062043	positive regulation of cardiac epithelial to mesenchymal transition	6/3670	8/18866	0.00105146	0.022823	0.0191582	TGFB2/ENG/TGFBR1/ACVR1/NOTCH1/JAG1	6
	BP	GO:0007163	establishment or maintenance of cell polarity	62/3670	220/18866	0.00105518	0.0228528	0.0191832	CDX2/DOCK8/KIF26B/MISP/RAC1/GOLPH3/SPINT2/RAC2/CLIC4/UST/RHOD/AQP1/MAPKAP1/GATA3/PARD6B/PDZD11/FRMD4A/MSN/RPGRIP1L/JAM3/DLG2/MARK2/MYO18A/RAB11FIP2/SPRY1/BRSK2/ARHGEF2/RHOC/RHOBTB3/SHH/PDLIM1/OPHN1/SPRY2/KIAA1614/SH3BP1/FSCN1/FSCN2/PKD1/HSP90AB1/MAP7/MAP2/PAX6/KIF2C/RHOBTB1/RHOF/LLGL2/MPP7/PARVA/FAT1/ERBIN/ARHGAP35/RHOB/MAP1B/WEE1/MTCL1/PARD6G/PARD6A/PLK1/WDPCP/ROCK1/CYP26B1/GJA1	62
	BP	GO:0060113	inner ear receptor cell differentiation	22/3670	59/18866	0.0010707	0.0231375	0.0194223	BMP4/SLITRK6/ESRP1/MKS1/FAT4/DLL1/TRIOBP/SLC4A7/MYO6/TRIP11/GSDME/FZD2/JAG2/CDH23/NOTCH1/FGFR1/JAG1/LHFPL5/MYO7A/GABRB3/ADGRV1/WDPCP	22
	BP	GO:0048771	tissue remodeling	52/3670	178/18866	0.00107966	0.0232796	0.0195415	MITF/HIF1A/ADRB2/RAC1/CTSK/TGM2/EPHA2/TMEM64/RAC2/CA2/VDR/TGFB3/LRP5/TMBIM1/IL18/SYK/IL23A/IL7/DEF8/RASSF2/CST3/AGT/LGR4/NCDN/CSK/EFNA2/F2R/LTBP3/TGFB1/EGFR/CSPG4/INPP5D/LIF/JAG1/TNFRSF11B/TNFAIP3/NOTCH2/ITGB3/BMPR2/LEPR/TNFRSF11A/MMP14/AXL/LRP6/LRRK1/PPP3CA/PPARGC1B/EPAS1/ROCK1/MDK/GJA1/ADAM8	52
	BP	GO:0072330	monocarboxylic acid biosynthetic process	68/3670	246/18866	0.00109663	0.0234845	0.0197135	PLA2G4F/SCD5/ALDH1A2/DEGS1/PTGS1/LIPH/CD74/DSE/AKR1C4/UST/VCAN/PLA2G4A/XBP1/LTC4S/MYO5A/FADS2/SLC27A2/LIPG/FADS1/FA2H/GPX4/PRXL2B/MLXIPL/NR1D1/PIBF1/QKI/PROX1/MID1IP1/ERLIN2/HSD17B4/FABP5/CHST14/HACD4/WDTC1/SCP2/GATM/DAGLB/ACSF3/ACOT8/EIF6/ABAT/ACACB/CSPG4/NDUFAB1/ELOVL5/CHST12/INSIG1/CYP2E1/DECR2/ACMSD/PTGES3/PTGES/GSTM4/ALDH1A3/FADS3/OSBPL3/TBXAS1/ASNS/BRCA1/ACSS1/DSEL/ABCD1/EDN1/PER2/CYP4F11/A…	68
	BP	GO:0003180	aortic valve morphogenesis	13/3670	28/18866	0.00109934	0.0234845	0.0197135	BMP4/EMILIN1/GATA4/ROBO1/GATA3/SLIT2/TGFB1/NOTCH1/JAG1/EFNA1/SNAI1/RB1/ROCK1	13
	BP	GO:0045932	negative regulation of muscle contraction	13/3670	28/18866	0.00109934	0.0234845	0.0197135	ADRB2/CALCRL/ADORA1/SRI/PDE5A/DOCK4/ZC3H12A/BIN1/GRK2/ARHGAP42/DOCK5/ADORA2B/PRKG1	13
	BP	GO:0120162	positive regulation of cold-induced thermogenesis	32/3670	97/18866	0.00110121	0.0234845	0.0197135	PRDM16/PDGFC/ACSL1/ADRB2/PPARGC1A/OXTR/ESRRG/IL18/SYK/ZBTB7B/UCP2/LCN2/FABP5/ACHE/GATM/EHMT1/MFN2/HADH/CXCR4/ZNF516/LPIN1/VEGFA/DYNC1H1/PEMT/CEBPB/LEPR/KDM3A/ALMS1/PER2/PPARGC1B/EPAS1/GJA1	32
	BP	GO:1901184	regulation of ERBB signaling pathway	32/3670	97/18866	0.00110121	0.0234845	0.0197135	PTPN3/GPRC5A/ADORA1/MVB12B/LGMN/ERBB2/AFAP1L2/VPS25/CBLC/AKT1/DAB2IP/RHBDF1/PTK6/APP/CCDC88A/AGT/HGS/SPRY1/ERRFI1/ITGA1/SPRY2/EGFR/BTC/PTPRJ/PLAUR/STAM/HIP1/HAP1/SOCS4/TGFA/IFI6/AGR2	32
	BP	GO:0050920	regulation of chemotaxis	64/3670	229/18866	0.00111701	0.0237693	0.0199526	PGF/SEMA4B/LPAR1/S100A14/SLAMF8/MET/ADGRA2/GAS6/PDGFD/PPM1F/RAC1/THBS1/CSF1/CD74/MYCBP2/SEMA4D/IL16/MST1L/FGF18/SEMA4A/RAC2/CXCL17/LYN/WNT3/IL6R/SEMA3F/LGMN/NRP1/SMAD3/DUSP1/ROBO1/SEMA4G/CXCL8/MCU/GPSM3/IL23A/PRKD1/SWAP70/JAM3/MST1/SLIT2/CCN3/MEGF8/SEMA3A/STX4/NBL1/DPP4/TGFB1/ZSWIM6/NOTCH1/FGFR1/CXCR4/BST1/SEMA3E/VEGFA/OXSR1/BMPR2/WNK1/EDN1/RARRES2/DYSF/PLXNA3/MDK/FGF2	64
	BP	GO:0072175	epithelial tube formation	41/3670	133/18866	0.00112891	0.0239468	0.0201016	FZD1/PRICKLE1/HIF1A/TGFB2/PTCH1/BMP4/FGFR2/PODXL/DLC1/SPINT2/OSR1/MKS1/LUZP1/KAT2A/COBL/ADM/ARID1A/SUFU/PRKACA/GATA3/ABL1/PROX1/WNT4/BCL10/SPINT1/CC2D2A/MTHFR/FZD2/IFT52/SKI/PAX8/LMO4/FOLR1/PHACTR4/TGFB1/KDM6A/PRKACB/LRP6/ARHGAP35/STIL/FZD6	41
	BP	GO:1902106	negative regulation of leukocyte differentiation	34/3670	105/18866	0.00113258	0.0239468	0.0201016	TMEM131L/BMP4/HLA-G/DTX1/CD74/ZBTB46/LYN/SMAD7/CDK6/ERBB2/TLR3/TLR4/FBN1/PIK3R1/TNFSF4/BCL6/ID2/TOB2/ZBTB7B/NME2/NFKBID/RUNX1/NRARP/NME1/INHA/ZC3H12A/SHH/GLI3/INPP5D/TMEM178A/ZFPM1/JAK3/FOXP3/MDK	34
	BP	GO:0009896	positive regulation of catabolic process	115/3670	454/18866	0.00113518	0.0239468	0.0201016	PRICKLE1/HIF1A/ADRB2/EPM2A/LRP1/TRIB2/DISC1/EZR/PIM2/SH3BP4/BTG2/SLC4A4/CTSC/ADORA1/PRR5L/ZFP36/CALCOCO2/FTO/ZFAND2A/RNF217/SMAD7/SNCA/TNFSF12/STING1/SIRT2/ELAPOR1/HK2/SNF8/WWP2/CDC20/LPCAT1/FAM122A/AKT1/DAB2IP/PSMC4/MLXIPL/AADAC/ZER1/GGA3/PRKD1/TRIM8/CD81/APP/SESN3/MSN/VPS13D/ATXN3/TOB1/TRIM32/SNX1/HSPB8/PIP4K2A/PIK3CB/TRIM22/FBXL5/TNFRSF1B/EDEM1/DET1/RNFT1/HERPUD1/TFEB/SPTLC2/DAB2/PAFAH1B2/ZC3H…	115
	BP	GO:0050804	modulation of chemical synaptic transmission	115/3670	454/18866	0.00113518	0.0239468	0.0201016	EPHB2/NPTXR/TPRG1L/PTPRS/ADRB2/CLSTN3/LRP8/DISC1/P2RY1/GUCY1B1/ADORA1/SIPA1L1/DKK1/BAIAP3/SYNGR1/PRNP/PLAT/MAP1A/PLCB4/OXTR/PRKAR2B/TMEM25/BDNF/CRTC1/SYNPO/EPHA4/VAMP1/CA2/KAT2A/SNCA/LAMA2/LGMN/EGR2/SYT1/NTSR1/PRKACA/CLSTN1/RAB3A/DLG4/CDC20/UNC13B/ABL1/PSMC5/SNCG/GNAI2/PTPRA/KCTD13/GLUL/APP/SHANK3/CALB2/DNM1/AGT/NCDN/CACNB3/ACHE/MECP2/RIN1/BACE1/NCS1/EGLN1/STXBP1/SLC12A2/NPTN/F2R/MTOR/ANAPC2/ADCY…	115
	BP	GO:0001952	regulation of cell-matrix adhesion	39/3670	125/18866	0.00114435	0.0240882	0.0202203	S100A10/LIMCH1/ADAM15/PPM1F/LRP1/RAC1/THBS1/CIB1/DISC1/CSF1/DLC1/CCL28/JUP/RHOD/NRP1/CDK6/SMAD3/ONECUT2/PIK3R1/ABL1/BCL6/COL16A1/WNT4/PIK3CB/UTRN/NINJ1/EPHA1/PLEKHA2/PEAK1/BST1/JAG1/SEMA3E/VEGFA/LDB1/PTPRJ/MMP14/MACF1/WDPCP/ROCK1	39
	BP	GO:0097193	intrinsic apoptotic signaling pathway	78/3670	290/18866	0.00117892	0.0247623	0.0207862	HIF1A/WWOX/SFN/ERO1A/ERN2/PPM1F/EPHA2/SEPTIN4/PERP/ITPR1/CD74/ZNF385A/FBH1/XBP1/CYLD/DDIT3/NACC2/PIK3R1/ATP2A3/IFI16/CYP1B1/HIPK2/ABL1/TOPORS/AKT1/DAB2IP/MOAP1/HIC1/BCL2L2/BCL2L1/IVNS1ABP/SOD2/TRIM32/GSDME/ATP2A1/PPP1R13B/BRSK2/TNFRSF1B/ARHGEF2/HERPUD1/TNFRSF10B/STYXL1/E2F1/TMEM109/CHAC1/PYCARD/ATM/BCAP31/BDKRB2/BBC3/ELL3/CRIP1/EIF2AK3/RAD9A/MAPK7/MAPK8IP1/FHIT/PLEKHF1/SGPP1/DDIAS/USP28/MARCHF7/H…	78
	BP	GO:0050655	dermatan sulfate proteoglycan metabolic process	9/3670	16/18866	0.00119204	0.0249305	0.0209273	CSGALNACT1/DSE/UST/CSGALNACT2/VCAN/CHST14/CSPG4/CHST12/DSEL	9
	BP	GO:0060413	atrial septum morphogenesis	9/3670	16/18866	0.00119204	0.0249305	0.0209273	TGFB2/CCN1/GATA4/ISL1/ACVR1/NOTCH2/BMPR2/SMO/ZFPM1	9
	BP	GO:0021954	central nervous system neuron development	28/3670	82/18866	0.00121395	0.0253343	0.0212663	EPHB2/EPHB3/ZMIZ1/FGFR2/DISC1/BTG2/MYCBP2/EPHA4/SCN1B/NRP1/ROBO1/ADARB1/B4GALT6/SLIT2/NIN/GLI2/SEMA3A/B4GALT5/NRP2/NTRK2/HSP90AB1/MAP2/MAPT/ARHGAP35/RAPGEF2/C12orf57/PLXNA3/NR4A2	28
	BP	GO:0046058	cAMP metabolic process	11/3670	22/18866	0.00124323	0.02589	0.0217328	ADCY5/PDE4C/EPHA2/ADCY9/PDE4B/ADCY1/PDE8B/ADCY4/PDE7B/ADCY3/ADCY7	11
	BP	GO:0048659	smooth muscle cell proliferation	51/3670	175/18866	0.00127046	0.0263444	0.0221142	NDRG2/BMP4/PDGFD/CALCRL/FGFR2/PPARG/THBS1/PTAFR/TGM2/PPARGC1A/MYB/LDLRAP1/IL6R/TGFB3/AKT1/GNAI2/IL18/ABCC4/ID2/ADAMTS1/SOD2/AGT/CCN3/TCF7L2/PDCD4/MFN2/MTOR/PHB/DNMT1/CYBA/HMGCR/EGFR/HDAC4/TPM1/CTNNBIP1/NOTCH3/NAMPT/FGF9/MEF2D/HMOX1/TNFAIP3/RBPMS2/AKR1B1/PRKG1/EDN1/IGFBP3/SERPINF2/JUN/GJA1/FGF2/ERN1	51
	BP	GO:1901568	fatty acid derivative metabolic process	51/3670	175/18866	0.00127046	0.0263444	0.0221142	PLA2G4F/SCD5/CYP2S1/ACSL1/PTGS1/ACSL5/CD74/FAAH2/OXCT1/AKR1C4/TLR2/PLA2G4A/AACS/LTC4S/MAPKAPK2/EPHX1/PLA2G10/FADS1/GPX4/CYP1B1/ZADH2/SYK/PRXL2B/PIBF1/DGAT1/PPT1/ACOX1/HSD17B4/FABP5/GSTA1/PON2/DAGLA/ACSL4/CYP2D7/DAGLB/ACSF3/BDH2/ELOVL5/CYP2U1/CYP2E1/PTGES3/PTGES/DGAT2/TBXAS1/BDH1/FAAH/ABCD1/CYP4F12/EDN1/CYP4F11/PLA2G4C	51
	BP	GO:0042176	regulation of protein catabolic process	102/3670	397/18866	0.00127885	0.0264622	0.0222131	PTPN3/PRICKLE1/LRP1/TRIB2/CDK5RAP3/DISC1/EZR/TIMP3/CTSC/ANXA2/MYCBP2/MAP1A/GNA12/ZFAND2A/EPHA4/RNF217/SMAD7/SNCA/TNFSF12/SIRT2/SUFU/SMAD3/PRKACA/SNF8/WWP2/RGP1/UBE2J1/CDC20/LPCAT1/FAM122A/HIPK2/DERL3/AKT1/DAB2IP/PSMC4/PSMD3/RHBDF1/ZER1/GGA3/SDCBP/ARNTL/CD81/CST3/MSN/ATXN3/TIMP2/TRIM32/SNX1/ATP13A2/HGS/FBXL5/BRSK2/TNFRSF1B/EDEM1/DET1/RNFT1/HERPUD1/DAB2/EGLN1/UQCC2/PLK2/PHB/SHH/EEF1A2/OPHN1/BCAP31/…	102
	BP	GO:0048872	homeostasis of number of cells	70/3670	256/18866	0.00128194	0.0264699	0.0222195	HIF1A/BMP4/CDK5RAP3/CSF1/CD74/ZFP36/SPNS2/CORO1A/HCLS1/LYN/DOCK11/CYLD/SH2B3/KLF13/CDK6/PDE4B/CEBPG/HIPK2/GATA3/DYRK3/ABL1/GCNT4/AKT1/BCL6/IL7/TRIM10/ID2/RASSF2/FLT3LG/JAM3/BCL10/TGFBR3/LGR4/PIK3CB/ITPKB/FANCC/CCN3/F2R/INHA/ISG15/NOTCH1/P4HTM/ARID4A/ARNT/CCNB2/IL20RB/BRD1/INPP5D/PIK3CD/B2M/LRRC19/VEGFA/AMPD3/SLC40A1/HMOX1/TNFAIP3/LDB1/AXL/SKIL/RB1/RBFOX2/SMO/ZFPM1/SOX6/LAT/JAK3/EZH2/ETS1/EPAS1/FO…	70
	BP	GO:0042058	regulation of epidermal growth factor receptor signaling pathway	30/3670	90/18866	0.00128703	0.0265188	0.0222606	PTPN3/GPRC5A/ADORA1/MVB12B/AFAP1L2/VPS25/CBLC/AKT1/DAB2IP/RHBDF1/PTK6/APP/CCDC88A/AGT/HGS/SPRY1/ERRFI1/ITGA1/SPRY2/EGFR/BTC/PTPRJ/PLAUR/STAM/HIP1/HAP1/SOCS4/TGFA/IFI6/AGR2	30
	BP	GO:0031333	negative regulation of protein-containing complex assembly	43/3670	142/18866	0.00129174	0.0265596	0.0222948	IQANK1/VILL/VIL1/CLDN7/DKK1/PTGER4/SNCA/TMSB10/SIRT2/CAPZB/FKBP4/TRIOBP/NLRC3/FHOD3/JAM3/ISL1/SCIN/ARHGEF2/SPTB/MKKS/SLIT2/STXBP1/LMO4/TMOD2/PPM1A/SSH1/NOP53/TMOD1/SORL1/CTNNBIP1/DYRK1A/MAP2/EPS8/CLIP3/SPTBN1/CAPG/EP300/TMC8/KANK3/TRIM9/RDX/PFN4/CRACD	43
	BP	GO:0032409	regulation of transporter activity	78/3670	291/18866	0.0013091	0.02686	0.022547	PTPN3/EPHB2/FXYD3/ADRB2/PPARG/PTAFR/STAC/PPARGC1A/SRI/GLRX/PRNP/DMD/SGK1/OSR1/GNB5/SCN1B/SNCA/MYO5A/WNK4/STIMATE/PDE4B/GPR35/NTSR1/PRKACA/WWP2/HSPA2/ANO9/DLG4/PKD2/WNK2/STIM2/CTSS/APP/SELENON/SHANK3/DLG2/SGK2/CACNB3/ATP2A1/RNF207/TACO1/NETO2/UTRN/FKBP1B/S100A1/NLGN2/CACNA1D/VAMP2/PCSK9/GEM/AKAP6/CHRM3/CACNB4/TESC/PLCG2/NOS1AP/CRACR2A/CACNB2/OXSR1/ANK3/STOM/CACNA2D1/FXYD6/TCAF1/AKAP9/TCAF2/WNK1/AT…	78
	BP	GO:0009855	determination of bilateral symmetry	41/3670	134/18866	0.0013258	0.0271456	0.0227867	PSKH1/HIF1A/ALDH1A2/ENG/DYNC2H1/TBX3/GATA4/GALNT11/FOXH1/MKS1/SUFU/SMAD3/DDIT3/DNAH11/PKD2/AP1B1/DLL1/RPGRIP1L/CC2D2A/RNF207/BBS5/IFT52/ACVR1/MKKS/OFD1/MEGF8/ARL13B/FOLR1/NBL1/SHH/NOTCH1/CITED2/DISP1/LRRC6/NOTCH2/TBX6/SMO/ARL6/PCSK5/CCDC40/STIL	41
	BP	GO:0048010	vascular endothelial growth factor receptor signaling pathway	32/3670	98/18866	0.00133478	0.0272094	0.0228403	PGF/HIF1A/RAC1/EMILIN1/NCF2/FGF18/VAV1/FZD4/MAPK11/MAPKAPK2/NRP1/WASF2/HHEX/PIK3R1/DAB2IP/PRKD1/ITGA5/PIK3CB/HGS/NIBAN2/MYOF/CYBA/NRP2/ARNT/FYN/VEGFA/FGF9/DOCK1/ITGB3/AXL/SHC2/ROCK1	32
	BP	GO:0010712	regulation of collagen metabolic process	19/3670	49/18866	0.00134009	0.0272094	0.0228403	BMP4/ENG/PPARG/EMILIN1/MFAP4/MYB/TGFB3/CIITA/CST3/WNT4/ERRFI1/F2R/RAP1A/VSIR/TGFB1/CCN2/LARP6/SERPINF2/VIM	19
	BP	GO:0042398	cellular modified amino acid biosynthetic process	19/3670	49/18866	0.00134009	0.0272094	0.0228403	SLC27A1/SHMT1/GCH1/CKMT1A/ALDH9A1/CKMT1B/FPGS/GCLM/ATIC/CHAC2/GATM/PLOD2/DHFR2/ACADM/CHAC1/GGCT/CHDH/OPLAH/CKMT2	19
	BP	GO:0061647	histone H3-K9 modification	19/3670	49/18866	0.00134009	0.0272094	0.0228403	PRDM16/SMAD4/MYB/PRDM5/ZNF304/GATA3/KAT2B/MECP2/EHMT1/DNMT1/MECOM/ARID4A/SETD7/CHEK1/BRCA1/KDM3A/JARID2/ASH1L/ATRX	19
	BP	GO:0001558	regulation of cell growth	107/3670	420/18866	0.00134496	0.0272515	0.0228756	SEMA4B/FBLN5/TGFB2/SYT17/ADAM15/SFN/PTPRS/IGFBP4/CLSTN3/LRP1/SMAD4/CAPRIN2/PPARG/RASAL1/CIB1/DISC1/SH3BP4/SEMA4D/TGFBR1/KLHL22/LTBP4/H3-3B/SEMA4A/BDNF/SGK1/CDHR2/EXTL3/WNT3/SEMA3F/SMAD7/IL17RB/NRP1/NRCAM/ERBB2/SYT1/SMAD3/CLSTN1/CHPT1/SEMA4G/HYAL2/FAM122A/ABL1/AKT1/CDKN2C/BCL6/TCHP/PPT1/SDCBP/SMARCA2/BCL11A/H3-3A/IP6K2/SGK2/TRIM32/KRT17/IGFBP7/DCBLD2/AGT/IFRD1/APBB2/ZFYVE27/SLIT2/CCN3/MEGF8/MTOR/A…	107
	BP	GO:1902622	regulation of neutrophil migration	17/3670	42/18866	0.00135959	0.0273412	0.0229509	SLAMF8/CD99L2/RAC1/CD74/IL1R1/RAC2/CXCL8/MCU/IL23A/JAM3/SLIT2/DPP4/BST1/EDN1/DYSF/MDK/ADAM8	17
	BP	GO:1904591	positive regulation of protein import	17/3670	42/18866	0.00135959	0.0273412	0.0229509	ARHGEF5/JUP/HCLS1/SMAD3/PIK3R1/HYAL2/ZPR1/ZC3H12A/SHH/GLI3/TGFB1/FLNA/HSP90AB1/MAVS/SMO/ECT2/CDK1	17
	BP	GO:0001841	neural tube formation	34/3670	106/18866	0.00136061	0.0273412	0.0229509	FZD1/PRICKLE1/HIF1A/TGFB2/PTCH1/BMP4/DLC1/SPINT2/MKS1/LUZP1/KAT2A/COBL/ADM/ARID1A/SUFU/PRKACA/ABL1/BCL10/SPINT1/CC2D2A/MTHFR/FZD2/IFT52/SKI/LMO4/FOLR1/PHACTR4/TGFB1/KDM6A/PRKACB/LRP6/ARHGAP35/STIL/FZD6	34
	BP	GO:0032414	positive regulation of ion transmembrane transporter activity	34/3670	106/18866	0.00136061	0.0273412	0.0229509	EPHB2/ADRB2/PTAFR/STAC/GLRX/DMD/WNK4/STIMATE/NTSR1/HSPA2/PKD2/WNK2/STIM2/CTSS/SHANK3/CACNB3/ATP2A1/RNF207/S100A1/AKAP6/TESC/PLCG2/NOS1AP/CRACR2A/CACNB2/ANK3/CACNA2D1/TCAF1/AKAP9/WNK1/ATP1B3/HAP1/CACNG4/ARC	34
	BP	GO:0006665	sphingolipid metabolic process	48/3670	163/18866	0.0013639	0.027351	0.0229592	FUT6/ST3GAL5/ST8SIA4/DEGS1/PLPP3/CCN1/ST6GALNAC6/SPTLC3/SPNS2/FUT3/SERINC2/ALDH3B1/FA2H/PPT1/PRKD1/ORMDL2/B4GALT6/SGPL1/ST6GALNAC4/HACD4/NEU1/PSAP/SMPD1/SPTLC2/SMPDL3B/A4GALT/SPTLC1/B4GALT5/TEX2/SPTSSB/ELOVL5/PLPP1/NEU3/ITGB8/B3GALNT1/ASAH1/SGPP1/PEMT/CERT1/SPTSSA/CSNK1G2/PRKD3/CREM/STS/ACER3/ALDH3B2/ABCA2/PPM1L	48
	BP	GO:1903039	positive regulation of leukocyte cell-cell adhesion	65/3670	235/18866	0.00136783	0.0273734	0.022978	DOCK8/HLA-G/ZMIZ1/RAC1/HLA-DMB/ITGB2/PTAFR/CD74/VAV1/CORO1A/MYB/HSPD1/FUT4/CD27/LYN/XBP1/CYLD/EGR3/PIK3R1/TNFSF4/GATA3/AKT1/BCL6/IL18/SYK/RASGRP1/IL23A/IL7/IL6ST/CD81/ZBTB7B/IL27RA/ZBTB1/CCDC88B/MALT1/BCL10/NFKBID/RUNX1/CSK/ITPKB/NFKBIZ/GLI2/HSPH1/SHH/GLI3/HLA-E/VSIR/DPP4/PYCARD/CD55/BTN2A2/FYN/LGALS1/DUSP10/TNFSF9/ICAM1/CD160/JAK3/SIRPA/PCK1/ETS1/CD83/FOXP3/MDK/ADAM8	65
	BP	GO:0018208	peptidyl-proline modification	22/3670	60/18866	0.00138405	0.0276412	0.0232028	ERO1A/FKBP7/PTPA/FKBP11/FKBP4/P3H1/FKBP15/P3H3/ERO1B/P4HA2/PPIA/EGLN1/EGLN3/FKBP1B/P4HTM/PPIL4/FKBP5/P3H2/FKBP14/P4HA3/NTMT1/PPIL6	22
	BP	GO:0021785	branchiomotor neuron axon guidance	5/3670	6/18866	0.00139768	0.0277996	0.0233358	MYCBP2/SEMA3F/NRP1/SEMA3A/PLXNA3	5
	BP	GO:0090027	negative regulation of monocyte chemotaxis	5/3670	6/18866	0.00139768	0.0277996	0.0233358	SLAMF8/DUSP1/SLIT2/CCN3/NBL1	5
	BP	GO:0048738	cardiac muscle tissue development	64/3670	231/18866	0.0014163	0.0281007	0.0235885	TGFB2/BMP4/ALDH1A2/ENG/DSP/SMAD4/FGFR2/RXRA/TBX3/HEG1/DKK1/MYH11/GATA4/TGFBR1/MEIS1/FOXH1/NEBL/FZD7/KAT2A/SMAD7/MAPK11/ARID1A/PPP1R13L/DLL1/DSG2/UBE4B/SAV1/MYH10/SGCB/PROX1/ID2/FHOD3/DIPK2A/CACYBP/SMAD1/AGT/TGFBR3/ISL1/ERBB3/ACVR1/EGLN1/CXADR/MTOR/TGFB1/MEF2A/TNNT2/NOTCH1/FGFR1/AKAP6/TPM1/TNNI1/VEGFA/ADAMTS9/RARB/FGF9/TAZ/JARID2/ZFPM1/SOX6/CCNB1/EDN1/CDK1/GJA1/FGF2	64
	BP	GO:0035290	trunk segmentation	4/3670	4/18866	0.00143012	0.0281007	0.0235885	SEMA3F/NRP1/SEMA3A/NRP2	4
	BP	GO:0036484	trunk neural crest cell migration	4/3670	4/18866	0.00143012	0.0281007	0.0235885	SEMA3F/NRP1/SEMA3A/NRP2	4
	BP	GO:0036486	ventral trunk neural crest cell migration	4/3670	4/18866	0.00143012	0.0281007	0.0235885	SEMA3F/NRP1/SEMA3A/NRP2	4
	BP	GO:0097490	sympathetic neuron projection extension	4/3670	4/18866	0.00143012	0.0281007	0.0235885	SEMA3F/NRP1/SEMA3A/NRP2	4
	BP	GO:0097491	sympathetic neuron projection guidance	4/3670	4/18866	0.00143012	0.0281007	0.0235885	SEMA3F/NRP1/SEMA3A/NRP2	4
	BP	GO:0050870	positive regulation of T cell activation	60/3670	214/18866	0.00143872	0.0282128	0.0236826	DOCK8/HLA-G/ZMIZ1/RAC1/HLA-DMB/CD74/VAV1/CORO1A/MYB/HSPD1/CD27/LYN/XBP1/CYLD/EGR3/PIK3R1/TNFSF4/GATA3/AKT1/BCL6/IL18/SYK/RASGRP1/IL23A/IL7/IL6ST/CD81/ZBTB7B/IL27RA/ZBTB1/CCDC88B/MALT1/BCL10/NFKBID/RUNX1/CSK/ITPKB/NFKBIZ/GLI2/HSPH1/SHH/GLI3/HLA-E/VSIR/DPP4/PYCARD/CD55/BTN2A2/FYN/LGALS1/DUSP10/TNFSF9/CD160/JAK3/SIRPA/PCK1/CD83/FOXP3/MDK/ADAM8	60
	BP	GO:0007492	endoderm development	27/3670	79/18866	0.00144904	0.0283581	0.0238046	COL6A1/BMP4/MMP15/SMAD4/ITGB2/HMGA2/DKK1/GATA4/LAMB3/SMAD3/LAMB1/DUSP1/COL12A1/SOX7/EXT1/LAMA3/PELO/ITGA5/COL7A1/COL5A2/SSBP3/LEO1/LAMC1/NOTCH1/MMP14/POU5F1/ARC	27
	BP	GO:0010634	positive regulation of epithelial cell migration	51/3670	176/18866	0.00145645	0.0284461	0.0238784	HIF1A/TGFB2/MET/ADGRA2/BMP4/VIL1/ITGA3/PPM1F/THBS1/CIB1/FGFBP1/PLPP3/MAPRE2/FGF18/MAP3K3/RAB25/LGMN/NRP1/SRPX2/GATA3/ABL1/AKT1/IQSEC1/PRKD1/PROX1/SASH1/CTSH/AGT/GLIPR2/EPB41L4B/ZC3H12A/MTOR/PLK2/TGFB1/NRP2/FGFR1/PLCG2/VEGFA/HMOX1/DOCK5/DOCK1/ITGB3/BMPR2/AKT3/RHOB/EDN1/JUN/ETS1/PRKCE/JCAD/FGF2	51
	BP	GO:0002063	chondrocyte development	14/3670	32/18866	0.00146371	0.0284738	0.0239016	CHST11/AXIN2/FGF18/SMAD7/BMPR1B/POC1A/CHSY1/RFLNA/EIF2AK3/MEX3C/RUNX2/BMPR2/SERPINH1/COL27A1	14
	BP	GO:1903959	regulation of anion transmembrane transport	14/3670	32/18866	0.00146371	0.0284738	0.0239016	THBS1/PTAFR/ACSL5/PRNP/OSR1/SLC43A2/ANO9/AKT1/AGT/MTOR/TCAF1/TCAF2/PER2/IRS2	14
	BP	GO:0010632	regulation of epithelial cell migration	80/3670	301/18866	0.00148563	0.0288425	0.0242112	NR2F2/TACSTD2/HIF1A/TGFB2/MET/PTPRM/ADGRA2/BMP4/VIL1/ITGA3/PPM1F/PPARG/VASH1/THBS1/CIB1/FGFBP1/PLPP3/PTPRG/EPHA2/ARSB/MAPRE2/FGF18/SEMA4A/DNAJA4/JUP/MAP3K3/RAB25/LGMN/NRP1/SRPX2/SPRED1/GATA3/ABL1/AKT1/DAB2IP/IQSEC1/PRKD1/GLUL/PRCP/PROX1/SERPINF1/SASH1/CTSH/AGT/GLIPR2/EPB41L4B/MECP2/SLIT2/STARD13/ZC3H12A/MTOR/SEMA3A/PLK2/TGFB1/NRP2/NOTCH1/FGFR1/SH3BP1/PLCG2/VEGFA/ADAMTS9/EFNA1/HMOX1/DOCK5/DUSP10/D…	80
	BP	GO:0032964	collagen biosynthetic process	20/3670	53/18866	0.00149915	0.0290472	0.024383	BMP4/ENG/PPARG/EMILIN1/MYB/TGFB3/COL1A1/CIITA/P3H3/WNT4/ERRFI1/F2R/TRAM2/RAP1A/TGFB1/CCN2/LARP6/SERPINF2/VIM/SERPINH1	20
	BP	GO:0008202	steroid metabolic process	87/3670	332/18866	0.00150442	0.0290915	0.0244202	APOL2/APOL1/ERG28/SOAT1/VLDLR/H6PD/RORC/CAT/RXRA/NPC1/CYB5R3/PPARGC1A/RORA/CUBN/EGR1/NPC2/CYB5R2/PBX1/LDLRAP1/AKR1C4/MBTPS1/HSD17B11/LGMN/ADM/VDR/SULT1A2/SREBF2/SLC27A2/LRP5/CYP1B1/UGT1A8/NFKB1/NR1D1/CYP4V2/PROX1/UGT1A1/APP/HSD17B2/ERLIN2/WNT4/SCARF1/HSD17B4/FMO5/IGFBP7/SGPL1/AGT/ACAA2/SCP2/MECP2/SMPD1/FAXDC2/STARD3/OSBPL5/SHH/ACOT8/SULT1A1/HMGCR/ACACB/FGFR1/PCSK9/FDXR/REST/INSIG1/CYP2E1/ASAH1/LS…	87
	BP	GO:0010769	regulation of cell morphogenesis involved in differentiation	82/3670	310/18866	0.00151601	0.0292575	0.0245595	EPHB2/SEMA4B/EPHB3/S100A10/TACSTD2/ARHGAP44/PTPRS/PLXNC1/LRP8/LRP1/RAC1/CAPRIN2/CIB1/DISC1/SIPA1L1/MYCBP2/SEMA4D/DNM3/SEMA4A/BDNF/UST/XK/EPHA4/WNT3/SEMA3F/NRP1/NRCAM/TIAM2/ROBO1/SEMA4G/ABL1/PLXND1/SARM1/TRIOBP/PLXNB1/SHANK3/TRAK1/UNC13D/IFRD1/MARK2/ZFYVE27/BRSK2/SLIT2/CHN1/NGEF/NIN/MEGF8/FBLN1/ANAPC2/SEMA3A/ZSWIM6/NEDD9/FLNA/NTRK2/TTL/MAP3K13/SEMA3E/VEGFA/MAP2/MAPT/EFNA1/RAP2A/DOCK5/DOCK1/BMPR2/S…	82
	BP	GO:0007369	gastrulation	54/3670	189/18866	0.00152965	0.0294623	0.0247315	COL6A1/IL1RN/BMP4/MMP15/ITGA3/SMAD4/FGFR2/ITGB2/ITGB4/EPHA2/HMGA2/DKK1/LAMB3/OSR1/ELF5/FZD7/WNT3/ARID1A/SMAD3/LAMB1/DUSP1/PRKACA/COL12A1/LRP5/SOX7/EXT1/LAMA3/SMAD1/MBP/ITGA5/COL7A1/COL5A2/ACVR1/MKKS/TXNRD1/LEO1/PHLDB1/HIRA/MEGF8/TBX19/FGFR1/KDM6A/MAPK7/TWSG1/ITGB3/SNAI1/BMPR2/MMP14/LRP6/WNK1/TBX6/POU5F1/HNF4A/GJA1	54
	BP	GO:0006766	vitamin metabolic process	40/3670	131/18866	0.00157237	0.0301964	0.0253476	TCN1/CYP2W1/ALDH1A2/CYB5R3/CUBN/PRSS3/PNPO/LGMN/CYB5A/SHMT1/RFK/VDR/SLC23A2/SLC46A1/NFKB1/PDZD11/UBIAD1/CD320/FPGS/TPK1/MTRR/MTHFR/PDXP/AMN/SLC2A1/FOLR1/DHFR2/FGFR1/MTR/SNAI1/CYP2R1/SLC19A2/CYP4F12/LRAT/ALDH1L2/CYP4F11/ACP3/CYP26B1/TCN2/SLC19A1	40
	BP	GO:0045581	negative regulation of T cell differentiation	18/3670	46/18866	0.00157421	0.0301964	0.0253476	TMEM131L/BMP4/DTX1/CD74/SMAD7/ERBB2/TNFSF4/BCL6/ZBTB7B/NFKBID/RUNX1/NRARP/ZC3H12A/SHH/GLI3/JAK3/FOXP3/MDK	18
	BP	GO:0030866	cortical actin cytoskeleton organization	16/3670	39/18866	0.00157705	0.0301964	0.0253476	VIL1/EZR/TLN1/FHOD3/ANLN/RTKN/EPB41/EHD2/EPB41L2/FHOD1/FMNL1/LLGL2/ECT2/AKAP11/FMNL3/ROCK1	16
	BP	GO:0030148	sphingolipid biosynthetic process	34/3670	107/18866	0.00162754	0.0309805	0.0260059	ST3GAL5/ST8SIA4/DEGS1/PLPP3/CCN1/ST6GALNAC6/SPTLC3/ALDH3B1/FA2H/PRKD1/ORMDL2/B4GALT6/SGPL1/ST6GALNAC4/HACD4/SMPD1/SPTLC2/A4GALT/SPTLC1/B4GALT5/SPTSSB/ELOVL5/PLPP1/ASAH1/SGPP1/PEMT/CERT1/SPTSSA/CSNK1G2/PRKD3/ACER3/ALDH3B2/ABCA2/PPM1L	34
	BP	GO:0035601	protein deacylation	34/3670	107/18866	0.00162754	0.0309805	0.0260059	ABHD17C/SIRT7/SDR16C5/ABHD17B/MTA3/SIRT2/PRDM5/JDP2/SPRED1/FRY/BCL6/PPT1/PRKD1/ZBTB7B/PRMT6/ATXN3/BRMS1L/FNTA/SKI/PHB/MSL3P1/HDAC4/FLNA/DYRK1A/REST/VEGFA/MAPT/ABHD17A/TPPP/MIDEAS/EP300/PER2/FOXP3/SIRT4	34
	BP	GO:0051983	regulation of chromosome segregation	34/3670	107/18866	0.00162754	0.0309805	0.0260059	CDC6/AXIN2/KLHL22/TRIP13/SIRT2/DUSP1/UBE2C/CDC20/CDCA5/MAPK15/RMI2/DDX11/ATM/SPAG5/FBXO5/NEK6/TTL/PTTG1/DYNC1H1/NEK2/KIF2C/AURKB/RAD18/SMC5/RB1/ECT2/CCNB1/BUB1/PLK1/ANAPC11/TTK/MKI67/ATRX/BUB1B	34
	BP	GO:0150117	positive regulation of cell-substrate junction organization	13/3670	29/18866	0.00164069	0.0310507	0.0260648	S100A10/PPM1F/RAC1/MAPRE2/NRP1/SMAD3/ABL1/IQSEC1/COL16A1/WNT4/VEGFA/PTPRJ/ROCK1	13
	BP	GO:0048562	embryonic organ morphogenesis	80/3670	302/18866	0.00164263	0.0310507	0.0260648	EPHB2/CHST11/HIF1A/SOBP/TSHZ1/FZD5/BMP4/ENG/FGFR2/TFAP2A/TBX3/EPHA2/EFEMP1/LRIG1/GATA4/TGFBR1/SLITRK6/NDST1/FOXH1/OSR1/ZEB1/TGFB3/ARID1A/SUFU/SMAD3/LRIG3/FBN1/PKD2/HIPK2/GATA3/DLL1/TRIOBP/STRA6/MYO6/PROX1/ID2/TTC39C/RNF207/BBS5/FZD2/IFT52/ACVR1/MKKS/OTX1/MEGF8/GLI2/PAX8/ARL13B/FOLR1/PHACTR4/SHH/GLI3/SPRY2/NOTCH1/FGFR1/KDM6A/INSIG1/RUNX2/RARB/FGF9/EFNA1/ALDH1A3/PAX6/NOTCH2/LHFPL5/RPL38/MMP14/MYO7A…	80
	BP	GO:0060760	positive regulation of response to cytokine stimulus	21/3670	57/18866	0.0016436	0.0310507	0.0260648	HIF1A/GAS6/CSF1/CASP1/CD74/IL1R1/TLR2/TLR4/NLRC5/IL7/TRIM32/AGPAT2/TRIM6/CXCR4/IRF7/PARP9/TRIM44/MAVS/AXL/EDN1/PARP14	21
	BP	GO:0018401	peptidyl-proline hydroxylation to 4-hydroxy-L-proline	7/3670	11/18866	0.00165035	0.0310507	0.0260648	ERO1A/ERO1B/P4HA2/EGLN1/EGLN3/P4HTM/P4HA3	7
	BP	GO:0021561	facial nerve development	7/3670	11/18866	0.00165035	0.0310507	0.0260648	SEMA3F/NRP1/EGR2/ADARB1/SEMA3A/NRP2/PLXNA3	7
	BP	GO:0021610	facial nerve morphogenesis	7/3670	11/18866	0.00165035	0.0310507	0.0260648	SEMA3F/NRP1/EGR2/ADARB1/SEMA3A/NRP2/PLXNA3	7
	BP	GO:0048660	regulation of smooth muscle cell proliferation	50/3670	173/18866	0.00171196	0.0321479	0.0269858	NDRG2/BMP4/PDGFD/CALCRL/FGFR2/PPARG/THBS1/PTAFR/TGM2/PPARGC1A/MYB/LDLRAP1/IL6R/TGFB3/AKT1/GNAI2/IL18/ABCC4/ID2/ADAMTS1/SOD2/AGT/TCF7L2/PDCD4/MFN2/MTOR/PHB/DNMT1/CYBA/HMGCR/EGFR/HDAC4/TPM1/CTNNBIP1/NOTCH3/NAMPT/FGF9/MEF2D/HMOX1/TNFAIP3/RBPMS2/AKR1B1/PRKG1/EDN1/IGFBP3/SERPINF2/JUN/GJA1/FGF2/ERN1	50
	BP	GO:0001961	positive regulation of cytokine-mediated signaling pathway	19/3670	50/18866	0.00177227	0.0331527	0.0278293	HIF1A/GAS6/CSF1/CASP1/CD74/IL1R1/NLRC5/IL7/TRIM32/AGPAT2/TRIM6/CXCR4/IRF7/PARP9/TRIM44/MAVS/AXL/EDN1/PARP14	19
	BP	GO:0042987	amyloid precursor protein catabolic process	19/3670	50/18866	0.00177227	0.0331527	0.0278293	TMED10/PRNP/EPHA4/LYN/GGA3/APP/BACE1/BIN1/NTRK2/SORL1/UNC13A/DYRK1A/GSAP/EFNA1/HAP1/SLC2A13/EFNA3/ROCK1/ABCA2	19
	BP	GO:0044262	cellular carbohydrate metabolic process	78/3670	294/18866	0.00177948	0.0331917	0.027862	B3GNT3/IGFBP4/SIRT7/RORC/B3GNT9/PTAFR/P2RY1/PPARGC1A/CSGALNACT1/RORA/PGD/NDST1/CSGALNACT2/PLA2G4A/IDH2/KAT2A/SNCA/NTSR1/HK2/AKT1/PHKB/KAT2B/EXT1/NR1D1/FGGY/IL6ST/FAM3C/GK/SORBS1/TPI1/PDXP/INPP5A/NDST2/MST1/MECP2/SLC2A1/MTOR/PHKG2/STK40/MYOF/PYGB/IMPA2/CRY1/B4GALT5/GBE1/HDAC4/ACACB/HKDC1/FBP1/XYLB/PPP1R3E/SOGA1/GYG2/PCDH12/B3GALNT1/DGAT2/GANC/SYNJ1/LEPR/B3GNT7/SLC35B4/PFKFB4/PFKFB3/EP300/AKR1B1/B4…	78
	BP	GO:0021537	telencephalon development	70/3670	259/18866	0.00178149	0.0331917	0.027862	EPHB2/EPHB3/LPAR1/HIF1A/PTPRS/BMP4/ZMIZ1/LRP8/LRP1/DISC1/BTG2/OXTR/KAT2A/CDK6/FAT4/ATAT1/SUN2/LAMB1/AQP1/ROBO1/DAB2IP/EXT1/NSUN5/DIXDC1/MYH10/ADGRG1/PROX1/ID2/BTBD3/XRN2/HERC1/SUN1/NUMB/RPGRIP1L/SHANK3/BBS2/ATIC/MKKS/SLIT2/NME1/NIN/SLC2A1/SKI/ARL13B/EFNA2/SEMA3A/CCDC85C/SYNE2/SHH/GLI3/ZSWIM6/EGFR/CXCR4/FLNA/NTRK2/SRGAP2C/NUMBL/RARB/ALDH1A3/PAX6/TACC1/LRP6/PHACTR1/ATP2B4/SMO/C12orf57/EZH2/CDK5R1/P…	70
	BP	GO:0003151	outflow tract morphogenesis	27/3670	80/18866	0.00178798	0.0331917	0.027862	FZD1/HIF1A/TGFB2/BMP4/ENG/SMAD4/FGFR2/TBX3/FOXH1/NRP1/ROBO1/PLXND1/TGFBR3/ISL1/FZD2/FOLR1/NRP2/NOTCH1/NPY1R/JAG1/VEGFA/RARB/CITED2/BMPR2/PARVA/ZFPM1/JUN	27
	BP	GO:1901224	positive regulation of NIK/NF-kappaB signaling	27/3670	80/18866	0.00178798	0.0331917	0.027862	IL18R1/CD14/TLR2/CD27/TLR3/TLR4/TLR6/NR3C2/IL18/IL23A/TRAF4/APP/SASH1/MALT1/EDARADD/TNFRSF10B/PDCD4/PHB/EGFR/TRIM44/LRRC19/EP300/TNFSF15/EDN1/TCIM/CARD14/PTP4A3	27
	BP	GO:0030206	chondroitin sulfate biosynthetic process	12/3670	26/18866	0.00181377	0.0336064	0.0282101	CHST11/CHST15/CSGALNACT1/DSE/CSGALNACT2/VCAN/CHSY1/CSPG4/CHST12/CHPF/XYLT1/CHST7	12
	BP	GO:0021955	central nervous system neuron axonogenesis	15/3670	36/18866	0.00182137	0.0336195	0.0282211	EPHB2/EPHB3/MYCBP2/EPHA4/SCN1B/ADARB1/B4GALT6/SLIT2/NIN/GLI2/B4GALT5/HSP90AB1/ARHGAP35/C12orf57/NR4A2	15
	BP	GO:0060323	head morphogenesis	15/3670	36/18866	0.00182137	0.0336195	0.0282211	DKK1/CRISPLD2/WNT3/TGFB3/COL1A1/STRA6/ARID5B/SGPL1/SSBP3/CSRNP1/SKI/ANKRD11/LRP6/EP300/PLEKHA1	15
	BP	GO:0090288	negative regulation of cellular response to growth factor stimulus	52/3670	182/18866	0.00184685	0.0340252	0.0285617	FZD1/CHST11/PRDM16/VASN/HTRA1/ADGRA2/THBS1/EMILIN1/GPC1/DKK1/TGFBR1/VEPH1/PEG10/SMAD7/TGFB3/SMAD3/FBN1/ONECUT2/SPRED1/HHEX/HIPK2/GATA3/ABL1/DAB2IP/LTBP1/WNT4/TOB1/AGT/TGFBR3/GLG1/HGS/SPRY1/SLIT2/SKI/NIBAN2/NBL1/PPM1A/TGFB1/SPRY2/NOTCH1/SORL1/CD109/TWSG1/LEMD3/EID2/SKIL/RBPMS2/ATP2B4/SPRY3/SPRY4/TMPRSS6/FGF2	52
	BP	GO:0060485	mesenchyme development	77/3670	290/18866	0.00185198	0.0340554	0.028587	SEMA4B/VASN/HIF1A/TGFB2/ADAM15/AKNA/BMP4/ALDH1A2/ENG/SMAD4/FGFR2/AXIN2/HMGA2/SEMA4D/GATA4/TGFBR1/SEMA4A/FOXH1/OSR1/SEMA3F/SMAD7/ANXA6/NRP1/TGFB3/SMAD3/ROBO1/SPRED1/SEMA4G/PKD2/COL1A1/GATA3/DAB2IP/SDCBP/WNT4/TRIM62/TGFBR3/CRELD1/ISL1/ERBB3/GLIPR2/SPRY1/ACVR1/NOTCH4/DAB2/PHLDB1/TCF7L2/PDCD4/MTOR/FOLR1/SEMA3A/DCHS1/PHACTR4/SHH/TGFB1/SPRY2/NRP2/NOTCH1/ELL3/FGFR1/AMER1/BASP1/S100A4/JAG1/SEMA3E/FAM172A…	77
	BP	GO:0017156	calcium-ion regulated exocytosis	23/3670	65/18866	0.001886	0.0346157	0.0290573	CADPS2/SYT17/SCAMP5/SYT8/BAIAP3/SYT1/RAB3A/UNC13B/GNAI2/TRPV6/CACNA1G/SCIN/STXBP1/VAMP2/NOTCH1/UNC13A/REST/DOC2B/DOC2A/HYAL3/STX1A/TRIM9/RIMS3	23
	BP	GO:0001819	positive regulation of cytokine production	112/3670	447/18866	0.00193922	0.0355257	0.0298212	HIF1A/SCAMP5/TLR5/FZD5/HLA-G/THBS1/C3/PTAFR/HEG1/CASP1/IL18R1/CD74/CD14/GATA4/IL16/RORA/IL1R1/EGR1/MYB/HSPD1/PTGER4/TLR2/CXCL17/XBP1/IL6R/MAPK11/STING1/PDE4B/CEBPG/CARD9/SMAD3/AFAP1L2/TLR3/TLR4/DDIT3/PIK3R1/IFI16/CYP1B1/HYAL2/TNFSF4/GATA3/TLR6/IL18/SYK/NFKB1/GPSM3/BIRC3/PIBF1/RNF135/RASGRP1/IL23A/IL7/ZCCHC3/IL6ST/CD81/POLR2H/APP/IL27RA/CCDC88B/MALT1/BCL10/TRIM32/AGT/RUNX1/MBP/ISL1/AGPAT2/ARHGEF2/…	112
	BP	GO:0006063	uronic acid metabolic process	11/3670	23/18866	0.00196689	0.0357636	0.030021	UGT1A8/UGT1A9/UGT1A3/UGT1A7/UGT1A5/UGT1A4/UGT1A10/UGT1A1/UGT1A6/XYLB/PRKCE	11
	BP	GO:0007413	axonal fasciculation	11/3670	23/18866	0.00196689	0.0357636	0.030021	EPHB2/EPHB3/CELSR3/TNFRSF21/EPHA4/NRP1/NRCAM/MEGF8/SEMA3A/ARHGAP35/CDK5R1	11
	BP	GO:0019585	glucuronate metabolic process	11/3670	23/18866	0.00196689	0.0357636	0.030021	UGT1A8/UGT1A9/UGT1A3/UGT1A7/UGT1A5/UGT1A4/UGT1A10/UGT1A1/UGT1A6/XYLB/PRKCE	11
	BP	GO:0106030	neuron projection fasciculation	11/3670	23/18866	0.00196689	0.0357636	0.030021	EPHB2/EPHB3/CELSR3/TNFRSF21/EPHA4/NRP1/NRCAM/MEGF8/SEMA3A/ARHGAP35/CDK5R1	11
	BP	GO:0060831	smoothened signaling pathway involved in dorsal/ventral neural tube patterning	8/3670	14/18866	0.00198	0.0358681	0.0301087	PTCH1/MKS1/SUFU/PRKACA/GLI2/GLI3/PRKACB/GORAB	8
	BP	GO:1901841	regulation of high voltage-gated calcium channel activity	8/3670	14/18866	0.00198	0.0358681	0.0301087	SRI/PDE4B/CACNB3/GEM/NOS1AP/CACNB2/CACNA2D1/DYSF	8
	BP	GO:0016358	dendrite development	67/3670	247/18866	0.00199612	0.036093	0.0302975	EPHB2/EPHB3/MATN2/LPAR1/LAMC2/VLDLR/ARHGAP44/PTPRS/LRP8/CAPRIN2/DISC1/SIPA1L1/SEMA4D/DNM3/MAP1A/BDNF/CRTC1/EPHA4/NRP1/COBL/RERE/DLG4/CDC20/IGSF9/DAB2IP/SARM1/IQSEC1/BTBD3/BCL11A/APP/CELSR2/SCARF1/SHANK3/TRAK1/ARID1B/MECP2/NGEF/ACSL4/MTOR/ANAPC2/SEMA3A/PLK2/C21orf91/MEF2A/FYN/SRGAP2C/ITSN1/MAP2/RTN4IP1/EFNA1/RAP2A/CPEB3/KIAA0319/PHACTR1/RBFOX2/DCDC2/RAPGEF2/MAP1B/PRKG1/ID1/PPP3CA/EZH2/CDK5R1/SDC2/…	67
	BP	GO:0048638	regulation of developmental growth	91/3670	353/18866	0.00202773	0.0365967	0.0307202	SEMA4B/SYT17/WWC3/PTCH1/PTPRS/BMP4/VIL1/ADRB2/LRP1/FGFR2/RASAL1/DISC1/CSF1/EZR/SEMA4D/TGFBR1/MEIS1/SEMA4A/BDNF/FTO/WNT3/SEMA3F/SMAD7/MAPK11/LGMN/NRP1/NRCAM/SYT1/TLL2/SEMA4G/ABL1/AKT1/DLL1/SAV1/IL7/PROX1/BCL11A/APP/BBS2/ATRN/SGPL1/IFRD1/TGFBR3/ZFYVE27/MKKS/STC2/CXADR/MEGF8/MTOR/ANAPC2/SEMA3A/RAI1/NOTCH1/ACACB/FGFR1/CXCR4/SH3PXD2B/AKAP6/TTL/BASP1/UNC13A/NPY1R/MAP3K13/SEMA3E/VEGFA/MAP2/MAPT/LATS1/FG…	91
	BP	GO:0002726	positive regulation of T cell cytokine production	10/3670	20/18866	0.00207451	0.0369678	0.0310318	FZD5/IL18R1/IL1R1/TNFSF4/GATA3/IL18/CD81/MALT1/B2M/RSAD2	10
	BP	GO:0016082	synaptic vesicle priming	10/3670	20/18866	0.00207451	0.0369678	0.0310318	CADPS2/VAMP1/SNCA/RAB3A/UNC13B/STXBP1/SNAP29/UNC13A/SYNJ1/STX1A	10
	BP	GO:0031290	retinal ganglion cell axon guidance	10/3670	20/18866	0.00207451	0.0369678	0.0310318	EPHB2/EPHB3/PTPRM/NRP1/NRCAM/BMPR1B/ISL1/SLIT2/VEGFA/ALCAM	10
	BP	GO:0045879	negative regulation of smoothened signaling pathway	14/3670	33/18866	0.00209182	0.0369678	0.0310318	PTCH1/SUFU/PRKACA/MEGF8/GLI2/GLI3/SERPINE2/PRKACB/RUNX2/GLIS2/PTCH2/HERC4/RB1/GPR37L1	14
	BP	GO:1902003	regulation of amyloid-beta formation	14/3670	33/18866	0.00209182	0.0369678	0.0310318	TMED10/PRNP/EPHA4/GGA3/APP/BIN1/NTRK2/SORL1/GSAP/EFNA1/HAP1/SLC2A13/ROCK1/ABCA2	14
	BP	GO:0006991	response to sterol depletion	9/3670	17/18866	0.0020976	0.0369678	0.0310318	AMFR/LYN/SREBF2/ARHGEF10L/ZBTB7B/ERLIN2/SPRING1/INSIG1/NPC1L1	9
	BP	GO:0021783	preganglionic parasympathetic fiber development	9/3670	17/18866	0.0020976	0.0369678	0.0310318	TFAP2A/SEMA3F/NRP1/EGR2/ADARB1/SEMA3A/NAV2/NRP2/PLXNA3	9
	BP	GO:0044539	long-chain fatty acid import into cell	9/3670	17/18866	0.0020976	0.0369678	0.0310318	FABP3/ACSL1/THBS1/ACSL5/SLC27A1/SLC27A2/AKT1/SLC2A1/IRS2	9
	BP	GO:0044764	multi-organism cellular process	9/3670	17/18866	0.0020976	0.0369678	0.0310318	GAS6/HYAL2/FCHSD2/CTSL/PPIA/FCHSD1/CXCR4/PI4KA/PIKFYVE	9
	BP	GO:0060644	mammary gland epithelial cell differentiation	9/3670	17/18866	0.0020976	0.0369678	0.0310318	HIF1A/PTCH1/ELF5/AKT1/ID2/LBH/LATS1/CEBPB/SMO	9
	BP	GO:0070293	renal absorption	9/3670	17/18866	0.0020976	0.0369678	0.0310318	CLDN4/AQP3/KCNQ1/GAS6/SGK1/WNK4/HYAL2/SLC15A2/HNF1A	9
	BP	GO:0097067	cellular response to thyroid hormone stimulus	9/3670	17/18866	0.0020976	0.0369678	0.0310318	PPARGC1A/LMO2/CTSS/KLF9/CTSL/CTSH/GCLM/THRB/RDX	9
	BP	GO:0140354	lipid import into cell	9/3670	17/18866	0.0020976	0.0369678	0.0310318	FABP3/ACSL1/THBS1/ACSL5/SLC27A1/SLC27A2/AKT1/SLC2A1/IRS2	9
	BP	GO:0032412	regulation of ion transmembrane transporter activity	71/3670	265/18866	0.00211879	0.0372738	0.0312886	PTPN3/EPHB2/FXYD3/ADRB2/PTAFR/STAC/PPARGC1A/SRI/GLRX/PRNP/DMD/OSR1/GNB5/SCN1B/MYO5A/WNK4/STIMATE/PDE4B/GPR35/NTSR1/PRKACA/WWP2/HSPA2/ANO9/DLG4/PKD2/WNK2/STIM2/CTSS/APP/SELENON/SHANK3/DLG2/CACNB3/ATP2A1/RNF207/TACO1/NETO2/UTRN/FKBP1B/S100A1/NLGN2/CACNA1D/VAMP2/PCSK9/GEM/AKAP6/CHRM3/CACNB4/TESC/PLCG2/NOS1AP/CRACR2A/CACNB2/OXSR1/ANK3/STOM/CACNA2D1/FXYD6/TCAF1/AKAP9/TCAF2/WNK1/ATP1B3/HAP1/CNIH2/CACNG…	71
	BP	GO:2001236	regulation of extrinsic apoptotic signaling pathway	47/3670	162/18866	0.00212303	0.0372811	0.0312948	SRPX/WWOX/BMP4/THBS1/UNC5B/TIMP3/TGFBR1/CYLD/TNFSF12/NRP1/ZMYND11/BCL2L14/BMPR1B/HYAL2/AKT1/TMBIM1/ITPRIP/LGALS3/BCL2L1/IL7/BCL10/GCLM/AGT/ARHGEF2/ACVR1/PEA15/TNFRSF10B/TCF7L2/STX4/ITM2C/PYCARD/FGFR1/FYN/MAPK7/DEPTOR/FAIM/TRPS1/HMOX1/TNFAIP3/BRCA1/ICAM1/PELI3/SKIL/TNFRSF12A/TMC8/ITGA6/IFI6	47
	BP	GO:0007422	peripheral nervous system development	26/3670	77/18866	0.00213657	0.0373842	0.0313813	PMP22/GPC1/BDNF/LAMA2/SIRT2/EGR2/ERBB2/ONECUT2/EGR3/FA2H/AKT1/ETV1/RUNX1/ISL1/ERBB3/CLDN1/SKI/NTRK2/ADGRB2/GSTM3/SERPINI1/NDRG1/DICER1/PRX/CDK1/ADGRG6	26
	BP	GO:0014015	positive regulation of gliogenesis	26/3670	77/18866	0.00213657	0.0373842	0.0313813	ETV5/PRKCH/LRP1/PPARG/CSF1/MYB/TLR2/LYN/EGR2/IL6ST/ID2/SPINT1/TNFRSF1B/MTOR/E2F1/BIN1/SHH/TGFB1/NOTCH1/CXCR4/PLAG1/SERPINE2/LIF/GJC2/DICER1/MDK	26
	BP	GO:0044706	multi-multicellular organism process	62/3670	226/18866	0.00214938	0.037448	0.0314349	APOL2/PGF/NR2F2/CLDN4/ITGA3/RXRA/VMP1/PTAFR/JUNB/OXTR/H3-3B/THBD/ADM/FOSB/VDR/TGFB3/ARID1A/FKBP4/AKT1/DSG2/ARNTL/COL16A1/CST3/H3-3A/WNT4/OVGP1/IGFBP7/AGT/PRDX3/ITGA5/STC2/SLC2A1/ACSL4/FBLN1/MTOR/TLE6/SH3PXD2B/PRDM1/SERPINE2/LIF/VEGFA/EPOR/NAMPT/SYDE1/BMPR2/FOSL1/ARHGDIB/PAM/STS/AKR1B1/ASH1L/HSD11B2/B4GALT1/PCSK5/EDN1/HYAL3/AGO2/PLA2G4C/TPPP3/ETS1/GJA1/SLC19A1	62
	BP	GO:0030501	positive regulation of bone mineralization	16/3670	40/18866	0.00215943	0.037448	0.0314349	BMP4/ADRB2/FAM20C/TFAP2A/CCN1/OSR1/TGFB3/SMAD3/BMPR1B/WNT4/ACVR1/TGFB1/ISG15/PKDCC/BMPR2/ADGRV1	16
	BP	GO:0042307	positive regulation of protein import into nucleus	16/3670	40/18866	0.00215943	0.037448	0.0314349	JUP/HCLS1/SMAD3/PIK3R1/HYAL2/ZPR1/ZC3H12A/SHH/GLI3/TGFB1/FLNA/HSP90AB1/MAVS/SMO/ECT2/CDK1	16
	BP	GO:0045746	negative regulation of Notch signaling pathway	16/3670	40/18866	0.00215943	0.037448	0.0314349	WWP2/AKT1/BCL6/DLL1/SLC35C1/NRARP/NIBAN2/CHAC1/EGFR/TSPAN15/NOTCH3/EGFL7/MMP14/LFNG/TCIM/BEND6	16
	BP	GO:0090184	positive regulation of kidney development	16/3670	40/18866	0.00215943	0.037448	0.0314349	BMP4/PDGFD/EGR1/IL6R/GATA3/WNT4/AGT/PROM1/LGR4/PAX8/SHH/WNT2B/BASP1/LIF/VEGFA/SMO	16
	BP	GO:0001838	embryonic epithelial tube formation	38/3670	125/18866	0.00221197	0.0382232	0.0320856	FZD1/PRICKLE1/HIF1A/TGFB2/PTCH1/BMP4/DLC1/SPINT2/OSR1/MKS1/LUZP1/KAT2A/COBL/ADM/ARID1A/SUFU/PRKACA/GATA3/ABL1/WNT4/BCL10/SPINT1/CC2D2A/MTHFR/FZD2/IFT52/SKI/PAX8/LMO4/FOLR1/PHACTR4/TGFB1/KDM6A/PRKACB/LRP6/ARHGAP35/STIL/FZD6	38
	BP	GO:0007368	determination of left/right symmetry	38/3670	125/18866	0.00221197	0.0382232	0.0320856	PSKH1/HIF1A/ENG/DYNC2H1/TBX3/GATA4/GALNT11/FOXH1/MKS1/SUFU/SMAD3/DNAH11/PKD2/AP1B1/DLL1/RPGRIP1L/CC2D2A/RNF207/BBS5/IFT52/ACVR1/MKKS/OFD1/MEGF8/ARL13B/FOLR1/SHH/NOTCH1/CITED2/DISP1/LRRC6/NOTCH2/TBX6/SMO/ARL6/PCSK5/CCDC40/STIL	38
	BP	GO:0061351	neural precursor cell proliferation	45/3670	154/18866	0.00223359	0.0385285	0.0323418	ZNF503/HIF1A/TRNP1/AKNA/EML1/FGFR2/DISC1/BTG2/SMARCD3/RORA/BDNF/SPINT2/LYN/SIRT2/RERE/GNAI2/DIXDC1/ADGRG1/PROX1/ID2/NUMB/RAPGEF1/SPINT1/TARBP2/ARHGEF2/DAGLA/GLI2/DAGLB/SHH/GLI3/NOTCH1/ELL3/FGFR1/SLC39A5/FLNA/NUMBL/VEGFA/PAX6/MELK/GJC2/SMO/RPGRIP1/GPR37L1/FZD6/MDK	45
	BP	GO:1904589	regulation of protein import	22/3670	62/18866	0.00225021	0.0387466	0.0325249	BMP4/ARHGEF5/JUP/HCLS1/SUFU/SMAD3/PIK3R1/HYAL2/ZPR1/MDFIC/ZC3H12A/SHH/GLI3/TGFB1/RAB23/FLNA/HSP90AB1/PKIG/MAVS/SMO/ECT2/CDK1	22
	BP	GO:0031109	microtubule polymerization or depolymerization	36/3670	117/18866	0.0022651	0.0388657	0.0326249	MET/RAC1/CIB1/MAPRE2/MAP1A/SNCA/MID1/FKBP4/ABL1/MID1IP1/TPX2/HDGFL3/SKA3/ARHGEF2/MECP2/NIN/TOGARAM2/TOGARAM1/FBXO5/KIF18B/KATNB1/DYRK1A/SLAIN2/MAP2/MAPT/STMN3/KIF2C/CLIP3/TPPP/TTBK2/AKAP9/NCKAP5L/MAP1B/NCKAP5/TPPP3/CDK5R1	36
	BP	GO:0045446	endothelial cell differentiation	36/3670	117/18866	0.0022651	0.0388657	0.0326249	NR2F2/PPP1R16B/MET/PTPRS/BMP4/ENG/SMAD4/HEG1/EZR/CLIC4/ZEB1/NRP1/DLL1/PROX1/MSN/RAPGEF1/ARHGEF26/ACVR1/NOTCH4/CLDN1/RAP1A/S1PR3/NOTCH1/CXCR4/CLDN3/PROC/S1PR2/GSTM3/JAG1/VEGFA/BMPR2/ICAM1/RAPGEF2/ID1/RDX/ROCK1	36
	BP	GO:0045185	maintenance of protein location	30/3670	93/18866	0.0022924	0.0391522	0.0328654	GET4/ARL2BP/GOLPH3/SRI/TMSB10/SUN2/SUFU/HK2/FBN1/PKD2/TOPORS/AKT1/LTBP1/SUN1/VPS13D/CCDC88A/SCIN/TAF3/NBL1/FLNA/SORL1/INSIG1/PKD1/TONSL/LATS1/ANK3/VPS13A/VPS13C/GJA1/PFN4	30
	BP	GO:1903035	negative regulation of response to wounding	30/3670	93/18866	0.0022924	0.0391522	0.0328654	PTPRS/TSPAN8/KREMEN1/THBS1/ANXA2/PLAT/EPHA4/THBD/SH2B3/SMAD3/CD9/WNT4/SLC12A2/PROS1/ABAT/HMGCR/CLDN3/SERPINE2/PROC/CD109/DUSP10/F12/PLAUR/KIAA0319/PRKG1/EDN1/SERPINF2/MDK/GJA1/FGF2	30
	BP	GO:0090630	activation of GTPase activity	34/3670	109/18866	0.00229992	0.0391522	0.0328654	TBC1D4/TBC1D2B/EPHA2/SIPA1L1/ARHGEF5/TBC1D13/TIAM2/TBC1D10C/MTSS2/RASGRP1/TBC1D8/EVI5L/TBC1D16/RAPGEF1/ARHGEF19/TBC1D9/ARHGEF26/NGEF/RALGAPA2/EPHA1/SGSM3/NEDD9/ARHGAP42/USP6NL/GMIP/TBCK/CCDC125/SYDE1/TBC1D1/TBC1D8B/TBC1D2/ECT2/SYDE2/RALGAPA1	34
	BP	GO:0030516	regulation of axon extension	31/3670	97/18866	0.00230591	0.0391522	0.0328654	SEMA4B/PTPRS/LRP1/DISC1/SEMA4D/SEMA4A/WNT3/SEMA3F/NRP1/NRCAM/SEMA4G/ABL1/IFRD1/ZFYVE27/MEGF8/ANAPC2/SEMA3A/TTL/MAP3K13/SEMA3E/VEGFA/MAP2/MAPT/BMPR2/KIAA0319/TNFRSF12A/MACF1/MAP1B/CDK5R1/PLXNA3/TRIM46	31
	BP	GO:0035710	CD4-positive, alpha-beta T cell activation	31/3670	97/18866	0.00230591	0.0391522	0.0328654	RORC/IL18R1/RORA/MYB/SEMA4A/PTGER4/SMAD7/TNFSF4/GATA3/BCL6/IL18/IL23A/CD81/CTSL/ZBTB7B/MALT1/NFKBID/RUNX1/NFKBIZ/ZC3H12A/MTOR/VSIR/CD55/TWSG1/RSAD2/CD160/ZFPM1/SATB1/JAK3/CD83/FOXP3	31
	BP	GO:0043648	dicarboxylic acid metabolic process	31/3670	97/18866	0.00230591	0.0391522	0.0328654	DLST/KYNU/OAT/IDH2/SHMT1/SLC46A1/GLUL/ALDH18A1/FPGS/GCLM/ATIC/MTRR/MTHFR/ME2/NIT2/FOLR1/DHFR2/ACSF3/ACOT8/ACMSD/MDH1B/GLS2/ALDH4A1/NAGS/GLS/ALDH1L2/AADAT/GLUD2/ME1/PCK1/SLC19A1	31
	BP	GO:0060976	coronary vasculature development	19/3670	51/18866	0.00231653	0.0392642	0.0329594	PRICKLE1/BMP4/DYNC2H1/TGFBR1/NDST1/NRP1/AP2B1/SUFU/SPRED1/PLXND1/LTBP1/MYH10/TGFBR3/MEGF8/NOTCH1/PRDM1/VEGFA/PCSK5/ADAMTS6	19
	BP	GO:0001666	response to hypoxia	92/3670	359/18866	0.00232305	0.0393064	0.0329948	PGF/AQP3/VASN/HIF1A/TGFB2/ADAM15/ERO1A/CAT/SMAD4/THBS1/PPARGC1A/ITPR1/ADORA1/RORA/PLAT/EGR1/MYB/LDHA/HSPD1/TLR2/ALDH3A1/ITPR2/CHCHD2/ADM/SIRT2/TGFB3/SMAD3/HK2/AQP1/HIPK2/PSMC5/AKT1/PSMC4/PSMD3/FAM162A/UCP3/UCP2/CST3/PSMD13/ACAA2/TGFBR3/PSMB8/MTHFR/LIMD1/MECP2/STC2/EGLN1/SLC2A1/NPEPPS/EGLN3/MTOR/E2F1/PLOD2/PDLIM1/SLC2A8/DPP4/CYBA/ATM/ABAT/NOP53/NOTCH1/ARNT2/PSMB10/CXCR4/CLDN3/ARNT/PSMD12/REST/VEGF…	92
	BP	GO:0034599	cellular response to oxidative stress	81/3670	310/18866	0.00232917	0.0393416	0.0330244	FZD1/ETV5/FBLN5/HIF1A/MET/ERO1A/GPX8/PDGFD/CAT/PPARGC1A/GUCY1B1/GATA4/PRR5L/NCF2/GPX3/MYB/SNCA/ALDH3B1/SIRT2/TLR4/AQP1/MAPKAP1/GCH1/BRF2/CYP1B1/PKD2/ABL1/TLR6/AKT1/PRKD1/ARNTL/CST3/LCN2/NME2/SOD2/ANKZF1/PRDX3/MAP1LC3A/ATP13A2/PSAP/TXNRD1/FANCC/VRK2/ZC3H12A/STX4/TLDC2/CYBA/EGFR/ARNT/TPM1/FYN/MAPK7/REST/MTR/ERCC6L2/MAPT/GPX2/PYCR1/HMOX1/TNFAIP3/SETX/MELK/AXL/FANCD2/CHD6/ABCD1/RHOB/ECT2/NQO1/EZH2/PL…	81
	BP	GO:0150116	regulation of cell-substrate junction organization	23/3670	66/18866	0.00236998	0.0399616	0.0335448	S100A10/LIMCH1/PPM1F/LRP1/RAC1/THBS1/DLC1/MAPRE2/RHOD/NRP1/SMAD3/ABL1/IQSEC1/COL16A1/WNT4/PEAK1/VEGFA/LDB1/PTPRJ/MMP14/MACF1/WDPCP/ROCK1	23
	BP	GO:0003209	cardiac atrium morphogenesis	13/3670	30/18866	0.00238488	0.0400743	0.0336394	TGFB2/ENG/CCN1/HEG1/GATA4/PROX1/ISL1/ACVR1/NOTCH1/NOTCH2/BMPR2/SMO/ZFPM1	13
	BP	GO:1902751	positive regulation of cell cycle G2/M phase transition	13/3670	30/18866	0.00238488	0.0400743	0.0336394	SMARCD3/PBX1/MTA3/HSPA2/DYRK3/CDC25C/APP/MECP2/FBXO5/CCNB1/ATAD5/CDK1/CDC7	13
	BP	GO:0045687	positive regulation of glial cell differentiation	17/3670	44/18866	0.00247001	0.0413788	0.0347345	PPARG/TLR2/EGR2/IL6ST/ID2/SPINT1/TNFRSF1B/MTOR/BIN1/SHH/TGFB1/NOTCH1/CXCR4/SERPINE2/LIF/DICER1/MDK	17
	BP	GO:0003143	embryonic heart tube morphogenesis	24/3670	70/18866	0.00247101	0.0413788	0.0347345	HIF1A/ENG/TBX3/GATA4/FOXH1/SUFU/SMAD3/PKD2/DLL1/RNF207/BBS5/IFT52/ACVR1/MKKS/MEGF8/ARL13B/FOLR1/SHH/NOTCH1/NOTCH2/TBX6/SMO/CCDC40/STIL	24
	BP	GO:0034764	positive regulation of transmembrane transport	58/3670	210/18866	0.00248125	0.0414791	0.0348186	EPHB2/SLC26A6/KCNQ1/ADRB2/C3/PTAFR/ACSL5/STAC/SRI/GLRX/DMD/KLF15/CA2/SNCA/WNK4/STIMATE/NTSR1/HSPA2/PIK3R1/PKD2/WNK2/ABL1/AKT1/STIM2/CTSS/SHANK3/AGT/CACNB3/ATP2A1/SORBS1/RNF207/F2R/S100A1/RAP1A/MEF2A/FLNA/RNASEL/AKAP6/TESC/KCNJ2/PLCG2/NOS1AP/CRACR2A/CACNB2/ANK3/CLIP3/CACNA2D1/GJC2/TCAF1/AKAP9/WNK1/ATP1B3/HAP1/CACNG4/IRS2/C2CD5/ARC/CEMIP	58
	BP	GO:0045995	regulation of embryonic development	40/3670	134/18866	0.00249362	0.0415461	0.0348749	FZD1/CDX2/IL1RN/BMP4/DKK1/OSR1/FZD7/MKS1/LAMA2/SUFU/PRKACA/GATA3/DLL1/LAMA3/WNT4/TBX18/MBP/RNF207/COL5A2/FZD2/NRARP/PHLDB1/EHMT1/NIBAN2/SHH/B4GALT5/NOTCH1/WNT2B/FGFR1/PRKACB/MAPK7/SNAI1/WNK1/LFNG/GORAB/HNF4A/CDK1/WDPCP/PHLDA2/GJA1	40
	BP	GO:0044242	cellular lipid catabolic process	64/3670	236/18866	0.00249379	0.0415461	0.0348749	FABP3/PLA2G4F/CYP2W1/LRP1/LIPH/PLBD1/LPIN3/CRAT/PLA2G4A/PLBD2/SIRT2/SLC27A2/LIPG/PLA2G10/CYP1B1/AKT1/AADAC/AKR1B10/PPT1/ACOX1/GDPD3/FUCA1/HSD17B4/FABP5/GPCPD1/SGPL1/ACAA2/NEU1/SCP2/PSAP/SMPD1/DAGLA/SMPDL3B/TYSND1/MTOR/CPT1B/DAGLB/HADH/ACADM/ACOT8/NUDT7/GDE1/ACACB/BDH2/SORL1/LPIN1/DECR2/NEU3/PLCG2/ASAH1/PNPLA3/DDHD2/FAAH/ACER3/ABCD1/CYP4F12/AUH/PNPLA7/IRS2/CYP4F11/PCK1/PLA2G4C/CYP26B1/LIPE	64
	BP	GO:0002720	positive regulation of cytokine production involved in immune response	20/3670	55/18866	0.002514	0.0417401	0.0350378	FZD5/HLA-G/IL18R1/CD74/IL1R1/TLR4/TNFSF4/GATA3/IL18/CD81/MALT1/BCL10/HLA-E/SCIMP/TRIM6/B2M/RSAD2/MAVS/CD160/GPRC5B	20
	BP	GO:0045620	negative regulation of lymphocyte differentiation	20/3670	55/18866	0.002514	0.0417401	0.0350378	TMEM131L/BMP4/DTX1/CD74/SMAD7/ERBB2/TNFSF4/BCL6/ID2/ZBTB7B/NFKBID/RUNX1/NRARP/INHA/ZC3H12A/SHH/GLI3/JAK3/FOXP3/MDK	20
	BP	GO:0048048	embryonic eye morphogenesis	15/3670	37/18866	0.00251886	0.0417497	0.0350458	FZD5/TFAP2A/EFEMP1/ZEB1/ARID1A/FBN1/HIPK2/STRA6/PROX1/PHACTR4/RARB/ALDH1A3/PAX6/LRP6/HIPK1	15
	BP	GO:0070997	neuron death	92/3670	360/18866	0.00253559	0.0419556	0.0352186	FZD1/HIF1A/RETREG1/TGFB2/LRP1/TFAP2A/UNC5B/CSF1/ITGB2/BTG2/PPARGC1A/TNFRSF21/ADORA1/DKK1/PRNP/EGR1/CORO1A/MYB/HSPD1/BDNF/SNCA/AIMP2/LGMN/NRP1/AP2B1/TGFB3/TLR4/DDIT3/HIPK2/GATA3/ABL1/TLR6/AKT1/SNCG/SARM1/FAM162A/BCL2L1/PPT1/SERPINF1/APP/ZPR1/ADARB1/SOD2/GCLM/ATP13A2/PPP1R13B/ISL1/ERBB3/TNFRSF1B/MECP2/BACE1/GAPDH/EGLN1/STXBP1/ITGA1/F2R/EGLN3/MTOR/FOXQ1/TLDC2/ADORA2A/NMNAT1/CPEB4/ATM/SSH1/HDAC4/PCSK…	92
	BP	GO:0050806	positive regulation of synaptic transmission	49/3670	172/18866	0.00261651	0.0429201	0.0360282	EPHB2/ADRB2/CLSTN3/ADORA1/BAIAP3/PRNP/OXTR/CRTC1/EPHA4/CA2/LAMA2/LGMN/SYT1/NTSR1/CLSTN1/DLG4/UNC13B/ABL1/KCTD13/GLUL/APP/SHANK3/CALB2/CACNB3/MECP2/STXBP1/NPTN/ADCY1/STX4/PLK2/ADORA2A/ABAT/NLGN2/CACNA1D/SSH1/VAMP2/EGFR/NTRK2/SERPINE2/UNC13A/CACNB2/MPP2/HAP1/CACNG4/STX1A/PRKCE/ARC/RIMS3/RAB3B	49
	BP	GO:0043367	CD4-positive, alpha-beta T cell differentiation	26/3670	78/18866	0.00262138	0.0429201	0.0360282	RORC/IL18R1/RORA/MYB/SEMA4A/PTGER4/SMAD7/TNFSF4/GATA3/BCL6/IL18/IL23A/CTSL/ZBTB7B/MALT1/NFKBID/RUNX1/NFKBIZ/ZC3H12A/MTOR/RSAD2/ZFPM1/SATB1/JAK3/CD83/FOXP3	26
	BP	GO:0021782	glial cell development	37/3670	122/18866	0.00262381	0.0429201	0.0360282	EIF2B2/LPAR1/LRP1/BACE2/ROR1/TLR2/LYN/CDK6/SIRT2/TLR4/FA2H/AKT1/MXRA8/DLL1/NR1D1/NSUN5/ID2/APP/CD9/B4GALT6/SKI/ADORA2A/SHH/B4GALT5/EGFR/NTRK2/MAPT/TPPP/NDRG1/SMO/WASF3/DICER1/PRX/VIM/MDK/ABCA2/ADGRG6	37
	BP	GO:0021612	facial nerve structural organization	6/3670	9/18866	0.00263351	0.0429201	0.0360282	SEMA3F/NRP1/EGR2/SEMA3A/NRP2/PLXNA3	6
	BP	GO:0033080	immature T cell proliferation in thymus	6/3670	9/18866	0.00263351	0.0429201	0.0360282	TMEM131L/BMP4/ERBB2/WNT4/SHH/FOXP3	6
	BP	GO:0035672	oligopeptide transmembrane transport	6/3670	9/18866	0.00263351	0.0429201	0.0360282	SLC26A6/CDH17/CA2/SLC15A2/SLC15A1/GJA1	6
	BP	GO:0061072	iris morphogenesis	6/3670	9/18866	0.00263351	0.0429201	0.0360282	HIF1A/HIPK2/WNT2B/PAX6/HIPK1/WNT9A	6
	BP	GO:0062042	regulation of cardiac epithelial to mesenchymal transition	6/3670	9/18866	0.00263351	0.0429201	0.0360282	TGFB2/ENG/TGFBR1/ACVR1/NOTCH1/JAG1	6
	BP	GO:1902959	regulation of aspartic-type endopeptidase activity involved in amyloid precursor protein catabolic process	6/3670	9/18866	0.00263351	0.0429201	0.0360282	EPHA4/LYN/BIN1/SORL1/EFNA1/EFNA3	6
	BP	GO:0022898	regulation of transmembrane transporter activity	73/3670	276/18866	0.00265788	0.0432449	0.036301	PTPN3/EPHB2/FXYD3/ADRB2/PTAFR/STAC/PPARGC1A/SRI/GLRX/PRNP/DMD/OSR1/GNB5/SCN1B/SNCA/MYO5A/WNK4/STIMATE/PDE4B/GPR35/NTSR1/PRKACA/WWP2/HSPA2/ANO9/DLG4/PKD2/WNK2/STIM2/CTSS/APP/SELENON/SHANK3/DLG2/CACNB3/ATP2A1/RNF207/TACO1/NETO2/UTRN/FKBP1B/S100A1/NLGN2/CACNA1D/VAMP2/PCSK9/GEM/AKAP6/CHRM3/CACNB4/TESC/PLCG2/NOS1AP/CRACR2A/CACNB2/OXSR1/ANK3/STOM/CACNA2D1/FXYD6/TCAF1/AKAP9/TCAF2/WNK1/ATP1B3/HAP1/CNIH2/…	73
	BP	GO:0022617	extracellular matrix disassembly	27/3670	82/18866	0.00267324	0.0432855	0.036335	MMP1/HTRA1/ADAM15/MMP15/LRP1/CTSK/LCP1/WDR72/TLL2/CTSS/CTSL/CST3/TIMP2/DPP4/TGFB1/LAMC1/SH3PXD2B/FSCN1/KIF9/MMP11/WASHC1/EXOC8/MMP14/TMPRSS6/ETS1/NOXO1/ADAM8	27
	BP	GO:0006636	unsaturated fatty acid biosynthetic process	21/3670	59/18866	0.0026857	0.0432855	0.036335	PLA2G4F/SCD5/DEGS1/PTGS1/CD74/PLA2G4A/LTC4S/FADS2/FADS1/PRXL2B/PIBF1/FABP5/DAGLB/ELOVL5/DECR2/PTGES3/PTGES/FADS3/TBXAS1/ABCD1/EDN1	21
	BP	GO:0042306	regulation of protein import into nucleus	21/3670	59/18866	0.0026857	0.0432855	0.036335	BMP4/JUP/HCLS1/SUFU/SMAD3/PIK3R1/HYAL2/ZPR1/MDFIC/ZC3H12A/SHH/GLI3/TGFB1/RAB23/FLNA/HSP90AB1/PKIG/MAVS/SMO/ECT2/CDK1	21
	BP	GO:0003148	outflow tract septum morphogenesis	12/3670	27/18866	0.00269239	0.0432855	0.036335	TGFB2/BMP4/ENG/SMAD4/FGFR2/NRP1/ROBO1/ISL1/NRP2/RARB/BMPR2/PARVA	12
	BP	GO:0010714	positive regulation of collagen metabolic process	12/3670	27/18866	0.00269239	0.0432855	0.036335	BMP4/ENG/MYB/TGFB3/WNT4/F2R/VSIR/TGFB1/CCN2/LARP6/SERPINF2/VIM	12
	BP	GO:0033081	regulation of T cell differentiation in thymus	12/3670	27/18866	0.00269239	0.0432855	0.036335	TMEM131L/BMP4/ZEB1/ERBB2/EGR3/RASGRP1/CAMK4/NFKBID/GLI2/SHH/FOXP3/ADAM8	12
	BP	GO:0071772	response to BMP	48/3670	168/18866	0.00269591	0.0432855	0.036335	FZD1/TGFB2/HTRA1/BMP4/ITGA3/ENG/SMAD4/CCN1/DKK1/GATA4/EGR1/FSTL1/SPINT2/SMAD7/TGFB3/SMAD3/FBN1/BMPR1B/HIPK2/GATA3/ABL1/TOB1/SPINT1/SMAD1/PELO/TGFBR3/ACVR1/PDCD4/MEGF8/SKI/NBL1/PPM1A/TGFB1/NEO1/NOTCH1/SLC39A5/SORL1/HIVEP1/TWSG1/RUNX2/LEMD3/NOTCH2/BMPR2/SKIL/RBPMS2/ID1/TMPRSS6/ADAMTS7	48
	BP	GO:0071773	cellular response to BMP stimulus	48/3670	168/18866	0.00269591	0.0432855	0.036335	FZD1/TGFB2/HTRA1/BMP4/ITGA3/ENG/SMAD4/CCN1/DKK1/GATA4/EGR1/FSTL1/SPINT2/SMAD7/TGFB3/SMAD3/FBN1/BMPR1B/HIPK2/GATA3/ABL1/TOB1/SPINT1/SMAD1/PELO/TGFBR3/ACVR1/PDCD4/MEGF8/SKI/NBL1/PPM1A/TGFB1/NEO1/NOTCH1/SLC39A5/SORL1/HIVEP1/TWSG1/RUNX2/LEMD3/NOTCH2/BMPR2/SKIL/RBPMS2/ID1/TMPRSS6/ADAMTS7	48
	BP	GO:0050730	regulation of peptidyl-tyrosine phosphorylation	70/3670	263/18866	0.00271008	0.0433186	0.0363628	GPRC5A/PDGFC/GAS6/PDGFD/LRP8/ARL2BP/ITGB2/CD74/ADORA1/SEMA4D/STAP2/PRNP/BDNF/EPHA4/HCLS1/LYN/IL6R/SH2B3/NRP1/AFAP1L2/VPS25/CBLC/DLG4/HYAL2/ABL1/CNTN1/IL18/SYK/PIBF1/IL23A/IL7/IL6ST/PTK6/CD81/APP/AGT/ITGA5/ISL1/ERBB3/ERRFI1/ARHGEF2/ACVR1/MTOR/TGFB1/BANK1/EGFR/NEDD9/BTC/CSPG4/NTRK2/PARP9/FYN/BST1/LIF/VEGFA/SPINK1/SOCS3/EFNA1/PTPRJ/ITGB3/TNK2/ICAM1/SH3BP5/SOCS4/LRRK1/GPRC5B/TGFA/PARP14/FGFR3/PRKCE	70
	BP	GO:0034637	cellular carbohydrate biosynthetic process	28/3670	86/18866	0.0027113	0.0433186	0.0363628	B3GNT3/B3GNT9/CSGALNACT1/NDST1/CSGALNACT2/AKT1/EXT1/NR1D1/SORBS1/PDXP/NDST2/SLC2A1/MTOR/PHKG2/IMPA2/B4GALT5/GBE1/FBP1/PPP1R3E/GYG2/B3GALNT1/B3GNT7/AKR1B1/B4GALT1/PER2/IRS2/PCK1/PPP1R3C	28
	BP	GO:0050772	positive regulation of axonogenesis	28/3670	86/18866	0.0027113	0.0433186	0.0363628	PLXNC1/LRP1/DISC1/SEMA4D/BDNF/WNT3/NRP1/TIAM2/ROBO1/PLXND1/PLXNB1/TRAK1/ZFYVE27/SLIT2/NIN/MEGF8/ANAPC2/NTRK2/MAP3K13/VEGFA/MAPT/BMPR2/SKIL/TNFRSF12A/MACF1/MAP1B/PLXNB3/PLXNA3	28
	BP	GO:0070371	ERK1 and ERK2 cascade	84/3670	325/18866	0.00271888	0.0433686	0.0364048	EPHB2/PSCA/NDRG2/PDGFC/BMP4/GAS6/PDGFD/LRP1/CAMK2N1/SMAD4/FGFR2/CIB1/CCN1/EMILIN1/EZR/EPHA2/TIMP3/P2RY1/CD74/GATA4/FGF18/OXTR/PTGER4/HLA-DRB1/LYN/NRP1/ERBB2/DUSP1/YWHAZ/TLR4/TBC1D10C/SPRED1/WNK2/ABL1/DAB2IP/GNAI2/SYK/DENND2B/RASGRP1/APP/CTSH/RAPGEF1/AGT/CSK/GLIPR2/SPRY1/ERRFI1/APIP/NPTN/FBLN1/F2R/PRXL2C/NELFE/PHB/RAP1A/SCIMP/PYCARD/TGFB1/SPRY2/HMGCR/IQGAP3/CCN2/NOTCH1/EGFR/BTN2A2/TNIP1/NPNT/DSTYK…	84
	BP	GO:0006029	proteoglycan metabolic process	29/3670	90/18866	0.00273684	0.0435229	0.0365342	CHST11/HS6ST1/CHST15/ARSB/CSGALNACT1/GPC1/HS3ST3B1/NDST1/DSE/UST/EXTL3/CSGALNACT2/VCAN/CHST10/BMPR1B/EXT1/CHSY1/CHST14/NDST2/TCF7L2/CSPG4/CHST12/CHPF/XYLT1/BMPR2/HPSE/DSEL/CHST7/SPOCK2	29
	BP	GO:0046632	alpha-beta T cell differentiation	33/3670	106/18866	0.00273748	0.0435229	0.0365342	RORC/IL18R1/RORA/MYB/SEMA4A/PTGER4/SMAD7/TNFSF4/GATA3/ABL1/BCL6/IL18/SYK/IL23A/CTSL/ZBTB7B/MALT1/NFKBID/RUNX1/ITPKB/NFKBIZ/PSAP/ZC3H12A/MTOR/SHH/GLI3/PRDM1/RSAD2/ZFPM1/SATB1/JAK3/CD83/FOXP3	33
	BP	GO:0070169	positive regulation of biomineral tissue development	18/3670	48/18866	0.00274891	0.0435623	0.0365674	BMP4/ADRB2/FAM20C/TFAP2A/CCN1/OSR1/TGFB3/SMAD3/BMPR1B/WNT4/ACVR1/TGFB1/ISG15/FBXO5/PKDCC/CEBPB/BMPR2/ADGRV1	18
	BP	GO:0110151	positive regulation of biomineralization	18/3670	48/18866	0.00274891	0.0435623	0.0365674	BMP4/ADRB2/FAM20C/TFAP2A/CCN1/OSR1/TGFB3/SMAD3/BMPR1B/WNT4/ACVR1/TGFB1/ISG15/FBXO5/PKDCC/CEBPB/BMPR2/ADGRV1	18
	BP	GO:0046777	protein autophosphorylation	64/3670	237/18866	0.0027797	0.0439788	0.036917	EPHB3/PDGFC/PDGFD/ENG/FGFR2/PIM2/EIF2AK1/MAP3K3/EPHA4/LYN/MAPKAPK2/ERBB2/PRKACA/WNK2/ABL1/AKT1/SYK/PRKD1/PTK6/RASSF2/STK10/CAMK4/NME2/HTATIP2/MARK2/ATP13A2/GRK5/CSK/SIK2/ERRFI1/VRK2/MAPK15/MTOR/ATM/EPHA1/EGFR/FGFR1/EIF2AK3/STYK1/NTRK2/AURKA/NEK6/FYN/PEAK1/DYRK1A/MAP3K13/VEGFA/RAP2A/OXSR1/NEK2/TSSK2/TRIM24/AURKB/TNK2/MELK/CSNK1G2/MKNK2/PRKG2/TSSK4/SRMS/FGFR3/JUN/TTK/ERN1	64
	BP	GO:0050796	regulation of insulin secretion	51/3670	181/18866	0.00279056	0.0440791	0.0370012	ADCY5/HIF1A/KCNS3/LRP1/RAC1/ARL2BP/MYRIP/ITPR1/SRI/BAIAP3/ICA1/OXCT1/HLA-DRB1/AACS/ITPR2/JAGN1/LRP5/MCU/NR1D1/GLUL/ARNTL/ISL1/BRSK2/CCN3/SLC2A1/TCF7L2/HMGN3/ACSL4/FKBP1B/GIPR/UQCC2/STX4/RAP1A/HADH/DPP4/ABAT/NLGN2/CACNA1D/HMGCR/REST/SYBU/DOC2B/SLC25A6/PER2/IRS2/PPP3CA/STX1A/HNF4A/PRKCE/GJA1/SIRT4	51
	BP	GO:1901214	regulation of neuron death	83/3670	321/18866	0.00283523	0.0447121	0.0375326	FZD1/HIF1A/RETREG1/TGFB2/LRP1/TFAP2A/UNC5B/CSF1/ITGB2/BTG2/PPARGC1A/ADORA1/DKK1/PRNP/EGR1/CORO1A/MYB/HSPD1/BDNF/SNCA/AIMP2/LGMN/NRP1/AP2B1/TGFB3/TLR4/DDIT3/HIPK2/GATA3/ABL1/TLR6/AKT1/SNCG/SARM1/BCL2L1/PPT1/SERPINF1/ZPR1/SOD2/GCLM/ATP13A2/PPP1R13B/ISL1/ERBB3/TNFRSF1B/MECP2/BACE1/EGLN1/STXBP1/ITGA1/F2R/EGLN3/MTOR/FOXQ1/TLDC2/ADORA2A/NMNAT1/CPEB4/ATM/SSH1/HDAC4/PCSK9/NTRK2/SORL1/FYN/ITSN1/REST/HSP90…	83
	BP	GO:0003158	endothelium development	40/3670	135/18866	0.00289005	0.0455031	0.0381965	NR2F2/PPP1R16B/MET/PTPRS/BMP4/ENG/SMAD4/HEG1/EZR/CLIC4/ZEB1/NRP1/DLL1/PROX1/MSN/RAPGEF1/ARHGEF26/ACVR1/NOTCH4/CLDN1/STARD13/RAP1A/S1PR3/NOTCH1/CXCR4/CLDN3/PROC/S1PR2/GSTM3/JAG1/VEGFA/SLC40A1/BMPR2/ICAM1/RHOB/RAPGEF2/ID1/RDX/ROCK1/GJA1	40
	BP	GO:0099003	vesicle-mediated transport in synapse	60/3670	220/18866	0.00289824	0.0455585	0.038243	CADPS2/SYT17/SYT8/P2RY1/DNM3/VAMP1/SNCA/AP2B1/SYT1/CLSTN1/RAB3A/UNC13B/SNCG/NUMB/DNM1/BRSK2/BACE1/NCS1/STXBP1/ADCY1/STX4/RAB27B/ADORA2A/RAP1A/SNPH/OPHN1/NLGN2/CACNA1D/VAMP2/STXBP5/SNAP29/DNAJC6/ITSN1/UNC13A/DOC2B/STX19/CHRNA5/CACNB2/USP46/SLC18A2/SEPTIN5/ITGB3/STON2/SYNJ1/DOC2A/PLD1/MX1/ADORA2B/PPFIA3/STX1A/GRIP2/FBXL20/CDK5R1/TRIM9/GRIP1/FCHO2/ROCK1/ARC/RIMS3/RAB3B	60
	BP	GO:0051180	vitamin transport	16/3670	41/18866	0.00291037	0.0456755	0.0383412	TCN1/CUBN/SLC27A1/ABCG2/SLC23A2/SLC46A1/STRA6/CD320/AMN/SLC2A1/FOLR1/SLC2A8/SLC2A6/SLC19A2/TCN2/SLC19A1	16
	BP	GO:0030308	negative regulation of cell growth	53/3670	190/18866	0.00295231	0.0462592	0.0388312	SEMA4B/TGFB2/ADAM15/PTPRS/SMAD4/CAPRIN2/PPARG/SH3BP4/SEMA4D/SEMA4A/CDHR2/WNT3/SEMA3F/NRP1/SMAD3/SEMA4G/HYAL2/CDKN2C/BCL6/TCHP/PPT1/SMARCA2/BCL11A/IP6K2/DCBLD2/AGT/IFRD1/APBB2/SLIT2/CCN3/SEMA3A/PHB/TGFB1/SERTAD2/ESR2/FBP1/SERPINE2/OSGIN1/EAF2/CDA/SEMA3E/MAP2/PTPRJ/BST2/BMPR2/KIAA0319/RB1/HNF4A/CDK5R1/PLXNA3/MINAR1/TRIM46/GJA1	53
	BP	GO:0021801	cerebral cortex radial glia guided migration	11/3670	24/18866	0.00299859	0.0466842	0.0391879	ZMIZ1/DISC1/SUN2/LAMB1/DAB2IP/ADGRG1/SUN1/SYNE2/GLI3/SRGAP2C/CDK5R1	11
	BP	GO:0021904	dorsal/ventral neural tube patterning	11/3670	24/18866	0.00299859	0.0466842	0.0391879	PTCH1/BMP4/MKS1/SUFU/PRKACA/GLI2/SHH/GLI3/PRKACB/SMO/GORAB	11
	BP	GO:0022030	telencephalon glial cell migration	11/3670	24/18866	0.00299859	0.0466842	0.0391879	ZMIZ1/DISC1/SUN2/LAMB1/DAB2IP/ADGRG1/SUN1/SYNE2/GLI3/SRGAP2C/CDK5R1	11
	BP	GO:0051905	establishment of pigment granule localization	11/3670	24/18866	0.00299859	0.0466842	0.0391879	SHROOM2/MYO5A/GPR143/BBS2/CDH3/BBS5/MKKS/RAB27B/RAB27A/MYO7A/ARL6	11
	BP	GO:0019079	viral genome replication	38/3670	127/18866	0.00300785	0.0467142	0.0392131	NFIA/OAS1/GAS6/OASL/HMGA2/IFI16/CXCL8/TBC1D20/PROX1/ATG16L1/ADARB1/TARBP2/PPIA/APOBEC3B/ZC3H12A/PHB/GRK2/IFI27/ISG15/NOTCH1/TRIM6/RNASEL/NUCKS1/TNIP1/PI4KA/FBXL2/STOM/BST2/RSAD2/MAVS/SLPI/APOBEC3F/RAB29/MX1/IFITM1/RESF1/EEA1/TOP2A	38
	BP	GO:0015849	organic acid transport	90/3670	353/18866	0.00301011	0.0467142	0.0392131	FABP3/SLC26A6/STARD5/PLA2G4F/ACSL1/PPARG/SLC16A5/THBS1/MPC1/RXRA/ACSL5/ADORA1/PRAF2/BDNF/SLC27A1/OSR1/AKR1C4/SLC35A2/XK/PLA2G4A/ABCC3/SLC25A30/ABCG2/SYT1/NTSR1/SLC23A2/SLC27A2/PLA2G10/RAB3A/SLC43A2/UNC13B/SLC46A1/AKT1/SYK/STRA6/ABCC4/SLCO1B3/SLC25A10/MID1IP1/SLCO1B7/LRRC8A/FABP5/SLC16A7/AGT/SLCO3A1/SLC25A44/SLC26A9/PSAP/STXBP1/SLC12A2/SLC2A1/ACSL4/LRRC8E/FOLR1/CPT1B/SLC16A4/ADORA2A/ABAT/BDKRB2/VA…	90
	BP	GO:0007605	sensory perception of sound	44/3670	152/18866	0.00301942	0.0467842	0.0392719	SOBP/KCNQ1/MYH14/TFAP2A/LRIG1/SLITRK6/COL4A3/HOMER2/ROR1/FZD4/COL1A1/TRIOBP/TUB/MYO6/MYO1A/GSDME/ESPN/EPS8L2/MBP/PSAP/MKKS/BIRC5/NAV2/NDUFB9/SPRY2/PJVK/CDH23/CACNA1D/FGFR1/GET1/WFS1/LHFPL5/THRB/TMPRSS3/RPL38/ICAM1/MYO7A/GABRB3/DCDC2/ADGRV1/PGAP1/USP53/COCH/CEMIP	44
	BP	GO:1901880	negative regulation of protein depolymerization	24/3670	71/18866	0.00305561	0.0472698	0.0396795	IQANK1/VILL/VIL1/CIB1/CAPZB/MID1/TRIOBP/SWAP70/MID1IP1/TPX2/HDGFL3/SCIN/ARHGEF2/SPTB/TMOD2/TMOD1/KATNB1/EPS8/SPTBN1/CAPG/TTBK2/MAP1B/RDX/CRACD	24
	BP	GO:0048675	axon extension	37/3670	123/18866	0.00306215	0.0472959	0.0397014	SEMA4B/AUTS2/PTPRS/LRP1/DISC1/SEMA4D/SEMA4A/BDNF/WNT3/SEMA3F/NRP1/NRCAM/SEMA4G/ABL1/IFRD1/ZFYVE27/SLIT2/MEGF8/ANAPC2/SEMA3A/NRP2/TTL/HSP90AB1/MAP3K13/SEMA3E/VEGFA/MAP2/MAPT/ALCAM/BMPR2/KIAA0319/TNFRSF12A/MACF1/MAP1B/CDK5R1/PLXNA3/TRIM46	37
	BP	GO:0052126	movement in host environment	48/3670	169/18866	0.00306795	0.0473105	0.0397137	MET/GAS6/TRIM31/EPHA2/NPC1/CD74/NECTIN4/HLA-DRB1/ITGB7/CHMP4C/WWP2/ITGB6/HYAL2/CXCL8/CLDN9/TRIM10/TRIM8/CD81/CTSL/VAMP8/TRIM32/TRIM62/ITGA5/TRIM22/PPIA/CLDN1/CHMP2B/CXADR/PHB/DPP4/GRK2/EGFR/TRIM6/CXCR4/CD55/CTNND1/LGALS1/SIVA1/ITGB3/TMPRSS2/ICAM1/AXL/MID2/IFITM1/HYAL3/CDK1/CR2/PIKFYVE	48
	BP	GO:1901222	regulation of NIK/NF-kappaB signaling	36/3670	119/18866	0.00311252	0.047922	0.040227	IL18R1/CD14/TLR2/CD27/CYLD/TLR3/TLR4/TLR6/NR3C2/IL18/IL23A/NLRC3/TRAF4/APP/SASH1/RASSF2/MALT1/EDARADD/CCN3/TNFRSF10B/PDCD4/ZC3H12A/PHB/PPM1A/EGFR/TRIM44/LRRC19/LITAF/EP300/LIME1/TNFSF15/EDN1/TCIM/C1QTNF3/CARD14/PTP4A3	36
	BP	GO:0006643	membrane lipid metabolic process	58/3670	212/18866	0.00312137	0.0479824	0.0402777	FUT6/ST3GAL5/ST8SIA4/DEGS1/ST3GAL4/PLPP3/CCN1/ST6GALNAC6/SPTLC3/SPNS2/FUT3/SERINC2/ALDH3B1/FA2H/CYP1B1/PPT1/PRKD1/ORMDL2/PGAP4/FUCA1/B4GALT6/SGPL1/ST6GALNAC4/HACD4/NEU1/PSAP/SMPD1/SPTLC2/ST3GAL6/SMPDL3B/ST3GAL2/PIGL/A4GALT/SPTLC1/B4GALT5/TEX2/SPTSSB/ELOVL5/PLPP1/NEU3/ITGB8/B3GALNT1/ASAH1/SGPP1/PEMT/CERT1/SPTSSA/CSNK1G2/PRKD3/CREM/STS/ACER3/PIGN/PGAP1/DPM3/ALDH3B2/ABCA2/PPM1L	58
	BP	GO:0048640	negative regulation of developmental growth	35/3670	115/18866	0.00315825	0.0483967	0.0406255	SEMA4B/WWC3/PTCH1/PTPRS/BMP4/ADRB2/SEMA4D/MEIS1/SEMA4A/WNT3/SEMA3F/MAPK11/LGMN/NRP1/TLL2/SEMA4G/SAV1/BCL11A/BBS2/IFRD1/STC2/CXADR/SEMA3A/RAI1/SEMA3E/MAP2/DUSP10/WWC2/KIAA0319/JARID2/FGFR3/CDK5R1/PLXNA3/TRIM46/GJA1	35
	BP	GO:0051261	protein depolymerization	35/3670	115/18866	0.00315825	0.0483967	0.0406255	IQANK1/VILL/VIL1/CIB1/MAP1A/CFL2/CAPZB/MID1/TRIOBP/SWAP70/MID1IP1/TPX2/HDGFL3/PDXP/SCIN/ARHGEF2/SPTB/TMOD2/TMOD1/KIF18B/SH3BP1/DNAJC6/KATNB1/EPS8/STMN3/KIF2C/SYNJ1/SPTBN1/CAPG/TTBK2/NCKAP5L/MAP1B/NCKAP5/RDX/CRACD	35
	BP	GO:0030104	water homeostasis	26/3670	79/18866	0.00319649	0.0486031	0.0407987	CLDN4/AQP3/ADCY5/MET/SFN/LSR/PRKAR2B/ADCY9/PRKACA/AQP1/FA2H/HYAL2/RAB11FIP2/GRHL1/CLDN1/SCNN1A/ADCY1/ADCY4/PRKACB/ADCY3/WFS1/CYP4F12/AKR1B1/ADCY7/AKAP11/CYP26B1	26
	BP	GO:0031016	pancreas development	26/3670	79/18866	0.00319649	0.0486031	0.0407987	MSLN/MET/BMP4/ALDH1A2/MEIS2/XBP1/IL6R/CDK6/ONECUT2/AKT1/DLL1/ARNTL/PROX1/GDF11/SRP54/ISL1/TCF7L2/GIPR/SHH/EIF2AK3/PAX6/WFS1/HNF1A/SMO/CCDC40/HNF4A	26
	BP	GO:0032272	negative regulation of protein polymerization	26/3670	79/18866	0.00319649	0.0486031	0.0407987	IQANK1/VILL/VIL1/SNCA/TMSB10/CAPZB/FKBP4/TRIOBP/FHOD3/SCIN/SPTB/MKKS/SLIT2/TMOD2/SSH1/TMOD1/DYRK1A/MAP2/EPS8/CLIP3/SPTBN1/CAPG/KANK3/RDX/PFN4/CRACD	26
	BP	GO:0098732	macromolecule deacylation	34/3670	111/18866	0.00319853	0.0486031	0.0407987	ABHD17C/SIRT7/SDR16C5/ABHD17B/MTA3/SIRT2/PRDM5/JDP2/SPRED1/FRY/BCL6/PPT1/PRKD1/ZBTB7B/PRMT6/ATXN3/BRMS1L/FNTA/SKI/PHB/MSL3P1/HDAC4/FLNA/DYRK1A/REST/VEGFA/MAPT/ABHD17A/TPPP/MIDEAS/EP300/PER2/FOXP3/SIRT4	34
	BP	GO:0060688	regulation of morphogenesis of a branching structure	20/3670	56/18866	0.00320663	0.0486031	0.0407987	PGF/ETV5/TACSTD2/BMP4/FGFR2/RXRA/ABL1/NTN4/BCL11A/AGT/LGR4/BTBD7/PAX8/SHH/WNT2B/FGFR1/MAP3K13/VEGFA/SMO/MDK	20
	BP	GO:0086065	cell communication involved in cardiac conduction	20/3670	56/18866	0.00320663	0.0486031	0.0407987	DSC2/KCNQ1/DSP/SRI/JUP/SCN1B/PRKACA/DSG2/CACNA1G/RNF207/CXADR/FKBP1B/CACNA1D/FLNA/GJD3/ATP1A3/CACNB2/CACNA2D1/TNNI3K/GJA1	20
	BP	GO:1903307	positive regulation of regulated secretory pathway	20/3670	56/18866	0.00320663	0.0486031	0.0407987	SCAMP5/ITGB2/PTAFR/SYT1/RAB3A/UNC13B/SYK/VAMP8/CACNA1G/UNC13D/STXBP1/STX4/SNX4/CACNA1D/RAB27A/DOC2B/CACNB2/ADORA2B/HYAL3/STX1A	20
	BP	GO:0007050	cell cycle arrest	63/3670	234/18866	0.00321641	0.0486757	0.0408597	TGFB2/SFN/CNOT11/ERN2/VASH1/THBS1/HMGA2/BTG2/PRNP/TGFBR1/ZNF385A/CDK6/SMAD3/DUSP1/PRKACA/DDIT3/PKD2/CXCL8/ABL1/DAB2IP/CDKN2C/KAT2B/MLXIPL/CDC25C/ID2/MAP3K20/TBRG4/APBB2/PRR11/TCF7L2/INHA/MTOR/E2F1/PLK2/BIN1/RBL2/PPM1A/TGFB1/ATM/NOTCH1/SGSM3/HMGN5/AURKA/RRAGD/PKD1/HSP90AB1/FOXM1/DDIAS/NOTCH2/E2F7/NKX3-1/BRCA1/CDKN1C/SKIL/RB1/EP300/ZFHX3/CCNB1/GAS2/GTSE1/CDK1/CDK5R1/ERN1	63
	BP	GO:0048644	muscle organ morphogenesis	27/3670	83/18866	0.00324038	0.0489623	0.0411003	FZD1/TGFB2/ENG/DSP/SMAD4/FGFR2/RXRA/HEG1/TGFBR1/FOXH1/SMAD7/UBE4B/PROX1/ADARB1/ARID5B/TGFBR3/ISL1/FZD2/EGLN1/TGFB1/TNNT2/NOTCH1/TPM1/TNNI1/LIF/MYLK/ZFPM1	27
	BP	GO:0090257	regulation of muscle system process	68/3670	256/18866	0.00325086	0.0489706	0.0411072	PDE9A/DSC2/KCNQ1/ADRB2/DSP/CALCRL/SMAD4/PTAFR/PPARGC1A/ADORA1/SRI/GATA4/PPP1R12B/OXTR/DMD/TNNI2/GTF2IRD1/JUP/SMAD7/ANXA6/PDE4B/SMAD3/PRKACA/FBXO32/DSG2/LMCD1/IL6ST/PDE5A/AGT/ATP2A1/RNF207/ERRFI1/TNFRSF1B/UTRN/DOCK4/F2R/ZC3H12A/FKBP1B/MTOR/BIN1/GRK2/ABAT/MEF2A/CCN2/TNNT2/NOTCH1/HDAC4/FLNA/ARHGAP42/AKAP6/TPM1/CHRM3/TNNI1/NPNT/KCNJ2/NOS1AP/DOCK5/AKAP9/JARID2/ADORA2B/ATP2B4/PRKG1/C12orf57/EDN1/TNNI3K…	68
	BP	GO:1901890	positive regulation of cell junction assembly	32/3670	103/18866	0.00325905	0.0489706	0.0411072	EPHB2/EPHB3/S100A10/CLSTN3/PPM1F/RAC1/EPHA2/SEMA4D/OXTR/SLITRK6/SEMA4A/BDNF/NRP1/SRPX2/SMAD3/CLSTN1/ABL1/COL16A1/FLRT3/WNT4/ADGRL1/AGT/AMIGO2/CLDN1/IL1RAP/NLGN2/CLDN3/NTRK2/ADGRB2/VEGFA/PTPRJ/ROCK1	32
	BP	GO:0045616	regulation of keratinocyte differentiation	17/3670	45/18866	0.00326045	0.0489706	0.0411072	MACROH2A2/AQP3/CDSN/PRKCH/CTSK/ZFP36/VDR/CTSL/NME2/RUNX1/GRHL1/ERRFI1/NOTCH1/CD109/SGPP1/TRIM16/ROCK1	17
	BP	GO:0007266	Rho protein signal transduction	41/3670	140/18866	0.00326102	0.0489706	0.0411072	LPAR1/MET/EPS8L3/ITGA3/RAC1/KANK2/ARHGEF28/HEG1/DLC1/ARHGEF3/GNA12/RHOD/NRP1/GPR35/ROBO1/ABL1/EPS8L1/BCL6/KCTD13/ADGRG1/RHOV/CDC42EP3/EPS8L2/ARHGEF2/STARD13/RTKN/F2R/PHACTR4/OPHN1/ARHGAP42/RIPOR1/EPS8/MYO9B/CCDC125/ARHGDIB/ARHGEF18/ARHGAP35/RHOB/RASGRF2/ABL2/ROCK1	41
	BP	GO:0055072	iron ion homeostasis	28/3670	87/18866	0.00326884	0.0490124	0.0411423	HIF1A/FTH1/SMAD4/STEAP4/SLC39A8/EIF2AK1/SRI/SLC39A14/ABCG2/ACO1/HYAL2/ATP6V1G1/SLC46A1/SLC22A17/LCN2/ATP13A2/FBXL5/EGLN1/CYBRD1/NEO1/ATP6V1A/BDH2/ATP6V0D1/B2M/SLC40A1/HMOX1/TMPRSS6/EPAS1	28
	BP	GO:0003177	pulmonary valve development	10/3670	21/18866	0.00327551	0.0490371	0.0411631	TGFB2/BMP4/ROBO1/STRA6/TNFRSF1B/SLIT2/NOTCH1/JAG1/NOTCH2/BMPR2	10
	BP	GO:0003334	keratinocyte development	7/3670	12/18866	0.00329676	0.0490538	0.0411771	SFN/CDSN/FLNB/PALLD/PSAP/DNASE1L2/FOSL2	7
	BP	GO:0007077	mitotic nuclear envelope disassembly	7/3670	12/18866	0.00329676	0.0490538	0.0411771	NEK9/CCNB2/NEK6/LPIN1/CCNB1/PLK1/CDK1	7
	BP	GO:0030208	dermatan sulfate biosynthetic process	7/3670	12/18866	0.00329676	0.0490538	0.0411771	DSE/UST/VCAN/CHST14/CSPG4/CHST12/DSEL	7
	BP	GO:1905668	positive regulation of protein localization to endosome	7/3670	12/18866	0.00329676	0.0490538	0.0411771	ABHD17C/EZR/ABHD17B/MSN/SORL1/ABHD17A/RDX	7
	BP	GO:0031338	regulation of vesicle fusion	13/3670	31/18866	0.0033844	0.0498575	0.0418517	STXBP6/TBC1D4/ANXA2/CPLANE2/CORO1A/VAMP1/SNCA/SYT1/RAB3A/STXBP1/DOC2B/TRIM9/C2CD5	13
	BP	GO:0060325	face morphogenesis	13/3670	31/18866	0.0033844	0.0498575	0.0418517	DKK1/CRISPLD2/TGFB3/COL1A1/STRA6/ARID5B/SGPL1/CSRNP1/SKI/ANKRD11/LRP6/EP300/PLEKHA1	13
	BP	GO:1903792	negative regulation of anion transport	13/3670	31/18866	0.0033844	0.0498575	0.0418517	THBS1/ADORA1/OSR1/GABRE/SLC43A2/ANO9/AKT1/MTOR/ABAT/PRKG2/TCAF2/IRS2/PLA2R1	13
	BP	GO:0006893	Golgi to plasma membrane transport	21/3670	60/18866	0.00338659	0.0498575	0.0418517	STXBP6/KRT18/GOLPH3/GGA3/EXOC6/C16orf70/BBS2/ARL3/CSK/SEC16A/AMN/OSBPL5/VAMP2/PKDCC/ANK3/SPTBN1/EXOC8/MACF1/RSC1A1/RAB34/EXOC5	21
	BP	GO:0042093	T-helper cell differentiation	21/3670	60/18866	0.00338659	0.0498575	0.0418517	RORC/IL18R1/RORA/MYB/SEMA4A/PTGER4/SMAD7/TNFSF4/GATA3/BCL6/IL18/IL23A/ZBTB7B/MALT1/NFKBID/NFKBIZ/ZC3H12A/MTOR/ZFPM1/JAK3/FOXP3	21
	BP	GO:0060042	retina morphogenesis in camera-type eye	21/3670	60/18866	0.00338659	0.0498575	0.0418517	PTPRM/TFAP2A/FJX1/LRP5/HIPK2/TOPORS/DLL1/NECTIN3/ZHX2/PROX1/RPGRIP1L/PROM1/NTRK2/THRB/NRL/LRP6/ROM1/MAN2A1/ARL6/HIPK1/RPGRIP1	21
	BP	GO:0061951	establishment of protein localization to plasma membrane	21/3670	60/18866	0.00338659	0.0498575	0.0418517	ARHGAP44/KRT18/GOLPH3/RILPL2/NECTIN3/GGA3/C16orf70/BBS2/CSK/SEC16A/AMN/VAMP2/PKDCC/ANK3/SPTBN1/MACF1/ARL6/RSC1A1/GRIP2/GRIP1/RAB34	21
	CC	GO:0005911	cell-cell junction	157/3802	493/19559	2.32631e-11	2.72643e-08	2.38263e-08	PTPRU/CLDN4/AQP3/EPCAM/CLDN2/PKP3/EVPL/DSC2/GJB3/ADAM15/PTPRM/STXBP6/CD99L2/CDSN/BAIAP2L1/CLDN23/SHROOM2/FZD5/SYNM/DSP/FRMD6/PODXL/CLDN7/PCDHGA12/PMP22/KRT8/PLPP3/HEG1/EPHA2/KRT18/PERP/CGN/ANXA2/ACTN1/LSR/TGFBR1/TLN1/VAV1/CORO1A/SPECC1L/CNN3/JUP/CLIC4/NECTIN4/FZD4/SYNPO/EPHA4/SCN1B/GJB4/S100A11/SMAD7/VSIG10/WNK4/WASF2/SIRT2/AOC1/PIK3R1/PKD2/ESAM/AKT1/CLDN9/MXRA8/DLL1/DSG2/NECTIN3/TCHP/PARD6B/PDZD…	157
	CC	GO:0031253	cell projection membrane	112/3802	344/19559	4.24699e-09	1.66023e-06	1.45088e-06	SLC34A2/KCNK1/PDE9A/SGCE/SLC26A6/DOCK8/PLA2G4F/PTCH1/SLC28A3/EPS8L3/HLA-G/ITGA3/RAC1/PSD/PODXL/S100P/CIB1/EZR/DLC1/EPHA2/UNC5A/CDHR5/ADORA1/TLN1/CUBN/DMD/PTPRH/LCP1/CDHR2/GPR157/PLEK2/GNA12/GABRE/RAB25/TXNDC15/ABCG2/AQP1/SLC9A3/TBC1D10C/FERMT2/ANTXR1/PKD2/SLC46A1/MTSS2/EPS8L1/PLXND1/MXRA8/FGD2/MYO6/TMEM231/MSN/SHANK3/BBS2/PROM1/EPS8L2/ITGA5/PDXP/ARHGEF2/BBS5/UTRN/NME1/SLC12A2/DAGLA/AMN/SLC5A1/SCN…	112
	CC	GO:0005938	cell cortex	102/3802	305/19559	4.24974e-09	1.66023e-06	1.45088e-06	LAMC2/KRT19/FNBP1/SEPTIN6/MYZAP/STXBP6/MISP/SHROOM2/SEPTIN1/RAC1/MYRIP/FGFR2/RIC8B/FLNB/EZR/DLC1/SEPTIN4/ANXA2/CORO1A/RAC2/HCLS1/RHOD/SNCA/ITPR2/CFL2/COBL/STIMATE/DLG4/FERMT2/FRY/PKD2/UNC13B/MTSS2/COTL1/TCHP/DENND2B/MYO6/PARD6B/FAM110C/MYH10/EXOC6/CD302/CALB2/MYO1A/TRAK1/ANLN/EXOC3L1/SCIN/SPTB/UTRN/PHLDB1/RHOC/FCHSD1/SLC2A1/RTKN/DCDC2B/RHOBTB3/CCN2/KIAA1614/EPB41/NEDD9/CRIP2/TMOD1/FLNA/CTNND1/SH3…	102
	CC	GO:0062023	collagen-containing extracellular matrix	132/3802	427/19559	7.29068e-09	2.13617e-06	1.8668e-06	MATN2/LAMC2/COL6A1/S100A6/S100A10/SRPX/FBLN5/COL4A4/TGFB2/HTRA1/FRAS1/FGFR2/THBS1/ANXA5/CCN1/EMILIN1/TGM2/TIMP3/GPC1/EFEMP1/CTSC/ANXA2/COL4A5/LAMB3/MFAP4/SDC3/LTBP4/COL4A3/EMILIN3/SCARA3/ADAMTS15/VCAN/CCDC80/LTBP2/PCOLCE/LAMA2/ANXA6/GPC4/TGFB3/SRPX2/LAMB1/ANXA4/COL12A1/FBN1/LAD1/EMILIN2/MEGF9/TNXB/COL1A1/P3H1/LTBP1/LGALS3/CSTB/NTN4/IL7/CTSS/COL16A1/SERPINF1/LAMA3/CTSL/LGALS4/CTSH/CST3/COL6A3/TIMP…	132
	CC	GO:0001726	ruffle	67/3802	179/19559	1.44229e-08	3.38072e-06	2.95441e-06	FGD3/PDE9A/S100A6/PLA2G4F/VIL1/EPS8L3/RAC1/PSD/PODXL/CIB1/EZR/DLC1/ASAP3/EPHA2/PALLD/ANXA2/ACTN1/TLN1/LCP1/S100A11/MYO5A/COBL/CDK6/WASF2/MTSS1/TLR4/WIPF1/MTSS2/EPS8L1/KLHL41/FGD2/MYO6/FGD6/PTK6/NME2/EPS8L2/ITGA5/PDXP/ARHGEF2/ARHGEF26/NME1/KLHL2/SCIMP/SPRY2/THEM4/AIF1L/CSPG4/FSCN1/TPM1/ARHGEF4/TESC/PLEKHO1/EPS8/PTPRJ/ITGB3/CAPG/TNFRSF12A/FGD4/MACF1/SPRY4/CD2AP/PARD6A/PLEKHA1/RDX/C2CD5/ROCK1/JCAD	67
	CC	GO:0031252	cell leading edge	129/3802	421/19559	1.93543e-08	3.78053e-06	3.30381e-06	FGD3/PDE9A/SGCE/S100A6/ARHGAP44/DOCK8/PLA2G4F/PTPRM/VIL1/EPS8L3/RAC1/PSD/PODXL/CIB1/EZR/DLC1/ITGB4/ASAP3/EPHA2/UNC5A/PALLD/PTPN13/ANXA2/ADORA1/ACTN1/TLN1/CORO1A/LCP1/RAC2/PLEK2/GABRE/S100A11/ABLIM3/MYO5A/COBL/CDK6/WASF2/TIAM2/MTSS1/TLR4/WIPF1/FERMT2/ANTXR1/PKD2/IQGAP2/ABL1/MTSS2/EPS8L1/PLXND1/KLHL41/FGD2/MYO6/DUOX1/FGD6/MYH10/SWAP70/PTK6/APP/CCDC88A/NME2/SNX1/EPS8L2/ITGA5/APBB2/PDXP/ARHGEF2/ARHGE…	129
	CC	GO:0098858	actin-based cell projection	75/3802	220/19559	1.92401e-07	3.22135e-05	2.81514e-05	PLEKHG6/WWOX/ADGRA2/VIL1/HLA-G/ITGA3/PODXL/S100P/CIB1/EZR/CDHR5/OXTR/DMD/PTPRH/HOMER2/LCP1/CDHR2/CLIC4/EPHA4/CA2/MYO5A/TIAM2/TBC1D10C/ANTXR1/HYAL2/IQGAP2/FCHSD2/SLC4A7/MYO6/CD302/APP/MSN/JAM3/CALB2/MYO1A/BBS2/PROM1/ESPN/EPS8L2/UTRN/RHOC/CXADR/DOCK4/SYNE2/SCIMP/TGFB1/ZSWIM6/CDH23/ATP6V1A/MYO1E/FSCN1/FSCN2/ANKS4B/MAP2/SLC6A6/DYNC1H1/EPS8/OSBPL3/LHFPL5/ITGB3/SLC26A2/ACTA2/MYO7A/MYO1B/FAT1/FGD4/AKR1B…	75
	CC	GO:0005604	basement membrane	42/3802	103/19559	4.83146e-07	7.07809e-05	6.18554e-05	MATN2/LAMC2/COL4A4/FRAS1/TIMP3/ANXA2/COL4A5/LAMB3/COL4A3/CCDC80/LAMA2/LAMB1/FBN1/LAD1/MEGF9/NTN4/SERPINF1/LAMA3/CST3/ADAMTS1/ATRN/COL7A1/ACHE/VWA1/LOXL1/FBLN1/LAMC1/COL4A6/APLP1/SMOC1/NPNT/P3H2/FREM2/COL9A3/TGFBI/FGF9/EFEMP2/COL4A1/ERBIN/NID2/ITGA6/TNC	42
	CC	GO:0045177	apical part of cell	125/3802	433/19559	1.15766e-06	0.000150754	0.000131744	SLC34A2/KCNK1/CLDN4/EPCAM/SLC26A6/PTCH1/SHROOM2/ADRB2/SLC39A4/LRP1/VASH1/PODXL/DYNC2H1/CIB1/CTSK/EZR/P2RY1/SLC39A8/CDHR5/PLAT/CUBN/OXTR/CEACAM5/PTPRH/SLC9A3R2/SLC39A14/HOMER2/CDHR2/CLIC4/CA2/IL6R/LGMN/FAT4/ERBB2/ABCG2/AQP1/SLC23A2/SLC9A3/GPR143/HYAL2/SLC46A1/MAL2/DLL1/DSG2/TCHP/SLC4A7/MYO6/PARD6B/SLC15A2/DUOX1/ABCC4/CTSL/PDZD3/APP/MSN/NUMB/SLC2A9/CD9/SLC15A1/MYO1A/PROM1/CACNB3/ERBB3/EPB41L4B/ADGR…	125
	CC	GO:0030427	site of polarized growth	65/3802	191/19559	1.30796e-06	0.000153293	0.000133963	AUTS2/NDRG2/PTCH1/PTPRS/MYH14/ORAI2/ITGA3/LRP1/PCDHGB1/CIB1/DISC1/PALLD/AMFR/EPHA4/HCLS1/SNCA/MYO5A/NRP1/COBL/BOC/SIRT2/CCDC120/TIAM2/FRY/FKBP4/FKBP15/MYH10/EXOC6/APP/ZPR1/FLRT3/TIMP2/TRAK1/ADGRL1/APBB2/ZFYVE27/UTRN/NGEF/NIN/CXADR/TMOD2/HNRNPR/CPEB4/SSH1/GPRIN1/FLNA/CTNND1/FSCN1/KATNB1/BASP1/MAPK8IP1/HSP90AB1/MAP2/MAPT/EPS8/STMN3/SETX/KIF21B/EXOC8/PCDH9/HAP1/MAP1B/SLC2A13/DICER1/CDK5R1	65
	CC	GO:0030426	growth cone	63/3802	184/19559	1.49547e-06	0.000159336	0.000139243	AUTS2/NDRG2/PTCH1/PTPRS/MYH14/ORAI2/ITGA3/LRP1/PCDHGB1/CIB1/DISC1/PALLD/AMFR/EPHA4/SNCA/MYO5A/NRP1/COBL/BOC/SIRT2/CCDC120/TIAM2/FKBP4/FKBP15/MYH10/EXOC6/APP/ZPR1/FLRT3/TIMP2/TRAK1/ADGRL1/APBB2/ZFYVE27/UTRN/NGEF/NIN/CXADR/TMOD2/HNRNPR/CPEB4/SSH1/GPRIN1/FLNA/CTNND1/FSCN1/KATNB1/BASP1/MAPK8IP1/HSP90AB1/MAP2/MAPT/EPS8/STMN3/SETX/KIF21B/EXOC8/PCDH9/HAP1/MAP1B/SLC2A13/DICER1/CDK5R1	63
	CC	GO:0016323	basolateral plasma membrane	78/3802	246/19559	2.85623e-06	0.000278958	0.000243781	CLDN4/AQP3/EPCAM/SLC26A6/TACSTD2/BEST1/KCNQ1/MET/MST1R/ITGA3/LRP1/DSP/CLDN7/PLPP3/EZR/P2RY1/SLC39A8/SLC4A4/ANXA2/ADORA1/CDH17/CEACAM5/SLC27A1/SLC39A14/LDLRAP1/CA2/IL6R/WASF2/ERBB2/AQP1/SLC23A2/PKD2/SLC46A1/SLC4A7/PDZD11/ABCC4/SLCO1B3/SLC41A1/CD81/MSN/NUMB/SLC2A9/MYO1A/DLG2/ITGA9/ERBB3/CLDN1/SLC12A2/SLC2A1/CXADR/FOLR1/STX4/EGFR/EPB41/SLC39A5/CHRM3/DSTYK/PKD1/HSP90AB1/MAP7/SLC6A6/SLC40A1/SLC29A2/DI…	78
	CC	GO:0005788	endoplasmic reticulum lumen	93/3802	308/19559	3.52843e-06	0.000318101	0.000277989	PTPRN2/APOL1/MZB1/TXNDC5/RCN1/COL6A1/COL4A4/PDGFC/MSLN/CYP2W1/ERO1A/H6PD/GPX8/BMP4/IGFBP4/POGLUT3/GAS6/PDGFD/FAM20C/FKBP7/THBS1/C3/CSF1/CCN1/GOLM1/ARSB/CTSC/COL4A5/COL4A3/FSTL1/VCAN/WNT3/MBTPS1/LAMB1/COL12A1/SLC27A2/FBN1/COL1A1/P3H1/MXRA8/LTBP1/IL23A/CERCAM/COL16A1/APP/CST3/P4HA2/COL6A3/WNT4/DNAJB11/IGFBP7/COL7A1/COL5A2/BACE1/STC2/C4A/VWA1/SELENOM/SHH/NUCB1/LAMC1/SERPINA1/POGLUT2/PCSK9/CFP/TSPAN1…	93
	CC	GO:0098862	cluster of actin-based cell projections	55/3802	159/19559	4.74682e-06	0.000397376	0.000347267	SLC34A2/KCNK1/SLC26A6/SLC28A3/MYH14/VIL1/FLNB/EZR/CDHR5/ACTN1/RGS19/CUBN/HOMER2/CDHR2/GNA12/CLIC1/ABCG2/AQP1/SLC9A3/SLC46A1/FCHSD2/SLC4A7/MYH10/PDZD3/SLC15A1/CALB2/MYO1A/BBS2/ESPN/EPS8L2/SCIN/MKKS/RHOC/AMN/SLC5A1/DOCK4/CYBRD1/FOLR1/ZSWIM6/CDH23/MYO1E/FSCN2/ANKS4B/HSP90AB1/NPC1L1/EPS8/PEMT/LHFPL5/MYO7A/MYO1B/DCDC2/B4GALT1/ADGRV1/RDX/SLC19A1	55
	CC	GO:0016324	apical plasma membrane	104/3802	361/19559	9.78505e-06	0.000764539	0.00066813	SLC34A2/KCNK1/CLDN4/EPCAM/SLC26A6/SHROOM2/ADRB2/SLC39A4/PODXL/CIB1/CTSK/EZR/P2RY1/SLC39A8/CDHR5/CUBN/OXTR/CEACAM5/PTPRH/SLC9A3R2/SLC39A14/CDHR2/IL6R/ERBB2/ABCG2/AQP1/SLC23A2/SLC9A3/GPR143/HYAL2/SLC46A1/MAL2/DLL1/DSG2/SLC4A7/PARD6B/SLC15A2/DUOX1/ABCC4/CTSL/PDZD3/MSN/SLC2A9/CD9/SLC15A1/MYO1A/PROM1/CACNB3/ERBB3/ADGRG2/SLC26A9/CLDN1/SLC12A2/AMN/SLC2A1/SLC5A1/SCNN1A/FOLR1/RAB27B/DUOX2/MUC13/DPP4/CYBA/…	104
	CC	GO:0005902	microvillus	36/3802	93/19559	1.2575e-05	0.000921121	0.000804968	PLEKHG6/WWOX/VIL1/PODXL/S100P/EZR/CDHR5/OXTR/PTPRH/CDHR2/CLIC4/CA2/HYAL2/IQGAP2/MYO6/CD302/MSN/JAM3/MYO1A/BBS2/PROM1/ESPN/TGFB1/ATP6V1A/MYO1E/FSCN1/ANKS4B/SLC6A6/ITGB3/SLC26A2/MYO7A/MYO1B/AKR1B1/SYTL1/MUC20/RDX	36
	CC	GO:0043296	apical junction complex	49/3802	143/19559	2.03449e-05	0.0014026	0.00122573	CLDN4/EPCAM/CLDN2/CLDN23/SHROOM2/FZD5/FRMD6/CLDN7/PMP22/CGN/TGFBR1/JUP/SYNPO/WNK4/AOC1/ESAM/CLDN9/MXRA8/NECTIN3/PARD6B/TRAF4/PDZD3/FRMD4A/RPGRIP1L/JAM3/KIFC3/SORBS1/EPB41L4B/CGNL1/ARHGEF2/CLDN1/MAPK15/CXADR/CCDC85C/PLEKHA7/CLDN3/CTNND1/SH3BP1/ANK3/MPP7/MPDZ/NHS/RAPGEF2/ECT2/ASH1L/POF1B/PARD6G/PARD6A/USP53	49
	CC	GO:0150034	distal axon	90/3802	309/19559	2.39013e-05	0.00155624	0.00136	PTPRN2/AUTS2/NDRG2/SEPTIN6/TPRG1L/PTCH1/PTPRS/MYH14/ORAI2/ITGA3/LRP1/PCDHGB1/CIB1/DISC1/PALLD/ADORA1/SRI/PRNP/ROR1/AMFR/EPHA4/SNCA/MYO5A/NRP1/COBL/BOC/SIRT2/CCDC120/TIAM2/NTSR1/RAB3A/FKBP4/UNC13B/FKBP15/SNCG/GLUL/MYH10/EXOC6/APP/ZPR1/HCN3/FLRT3/TIMP2/CALB2/KCNAB2/TRAK1/ADGRL1/APBB2/ZFYVE27/BRSK2/KCNIP3/NCS1/UTRN/NGEF/NIN/CXADR/TMOD2/HNRNPR/CPEB4/OPHN1/SSH1/GPRIN1/FLNA/CTNND1/NTRK2/ATP6V0D1/FSCN1/…	90
	CC	GO:0009925	basal plasma membrane	23/3802	51/19559	2.70531e-05	0.00166875	0.00145832	CLDN4/TACSTD2/BEST1/MET/MST1R/SLC27A1/LDLRAP1/ERBB2/AQP1/SLC23A2/PKD2/CD81/MYO1A/ITGA9/ERBB3/SLC12A2/EGFR/CHRM3/ANK3/BMPR2/ERBIN/ITGA6/MUC20	23
	CC	GO:0030027	lamellipodium	63/3802	201/19559	3.64625e-05	0.0021367	0.00186726	FGD3/DOCK8/PTPRM/VIL1/RAC1/PODXL/CIB1/EPHA2/PALLD/PTPN13/CORO1A/RAC2/PLEK2/ABLIM3/WASF2/TIAM2/FERMT2/ANTXR1/PKD2/IQGAP2/MTSS2/PLXND1/FGD2/FGD6/MYH10/SWAP70/APP/CCDC88A/NME2/SNX1/APBB2/PDXP/ABLIM1/KLHL2/STX4/SYNE2/PHACTR4/DPP4/SSH1/NEDD9/CTNND1/SH3BP1/CSPG4/FSCN1/ARHGAP31/ITSN1/TESC/MYLK/EVL/ITGB3/ACTA2/CAPG/PARVA/NHS/FAT1/AJUBA/FGD4/MCC/WASF3/DYSF/RDX/ROCK1/ARPIN	63
	CC	GO:0098857	membrane microdomain	94/3802	330/19559	4.12029e-05	0.00229951	0.00200954	S100A10/VDAC1/KCNQ1/PTCH1/LRP8/PODXL/UNC5B/PLPP3/ITGB2/EZR/DLC1/UNC5A/NPC1/GPC1/ANXA2/CD14/PRNP/TGFBR1/RGS19/DMD/PRKAR2B/HSPD1/PLLP/TLR2/LYN/ABCG2/NTSR1/PRKACA/CBLC/SPRED1/HYAL2/TLR6/MAL2/CNTN1/GNAI2/DLL1/EEF2/BIRC3/PPT1/SDCBP/STX12/ADGRG1/APP/ERLIN2/MYO1A/BCL10/SORBS1/CSK/TNFRSF1B/LAMP2/BACE1/ITGA1/SLC2A1/CXADR/F2R/ADCY1/SHH/DPP4/MYOF/EGFR/RFTN1/EHD2/CD55/MALL/AKAP6/PLPP1/FYN/INPP5D/NOS1AP/MAPT/…	94
	CC	GO:0031256	leading edge membrane	56/3802	175/19559	5.09016e-05	0.00248878	0.00217495	PDE9A/SGCE/ARHGAP44/DOCK8/PLA2G4F/EPS8L3/RAC1/PSD/CIB1/EZR/DLC1/EPHA2/UNC5A/ADORA1/TLN1/LCP1/PLEK2/GABRE/FERMT2/ANTXR1/MTSS2/EPS8L1/PLXND1/FGD2/MYO6/EPS8L2/ITGA5/PDXP/ARHGEF2/NME1/DAGLA/SYNE2/ADORA2A/DPP4/SCIMP/SPRY2/THEM4/AIF1L/CSPG4/TPM1/ARHGEF4/TESC/MAPT/PLEKHO1/EPS8/MPP2/PTPRJ/ITGB3/SPTBN1/MACF1/SPRY4/ADGRV1/PLEKHA1/C2CD5/KCNC3/JCAD	56
	CC	GO:0030057	desmosome	14/3802	25/19559	5.42163e-05	0.00248878	0.00217495	PKP3/EVPL/DSC2/CDSN/DSP/PERP/JUP/DSG2/TCHP/PPL/JAM3/KAZN/B4GALT1/POF1B	14
	CC	GO:0005903	brush border	38/3802	106/19559	5.49516e-05	0.00248878	0.00217495	SLC34A2/KCNK1/SLC26A6/SLC28A3/MYH14/VIL1/FLNB/EZR/CDHR5/ACTN1/RGS19/CUBN/CDHR2/GNA12/CLIC1/ABCG2/AQP1/SLC9A3/SLC46A1/MYH10/PDZD3/SLC15A1/MYO1A/ESPN/SCIN/AMN/SLC5A1/CYBRD1/FOLR1/MYO1E/ANKS4B/HSP90AB1/NPC1L1/EPS8/PEMT/MYO1B/B4GALT1/SLC19A1	38
	CC	GO:0005774	vacuolar membrane	116/3802	427/19559	5.56243e-05	0.00248878	0.00217495	TSPAN1/COL6A1/VASN/VLDLR/PLA2G4F/LRP1/PIGR/CLN5/VMP1/HLA-DMB/SLC39A8/NPC1/CD74/ANXA2/SYNGR1/CALCOCO2/CUBN/SLC39A14/HLA-DRB1/HLA-DMA/THBD/ATP6V1C2/ANXA6/STING1/AP2B1/RAB37/ELAPOR1/TLR3/HLA-DOB/GLIPR1/GPR143/LPCAT1/ATP6V1G1/AP1B1/ECE1/TMBIM1/CYB561/CCZ1B/MYO6/GNAQ/PRKD1/MAN2B1/PRCP/AP5S1/SLC22A17/ATG16L1/VAMP8/CCZ1/TMEM150C/MAP1LC3A/ATP13A2/TECPR1/NEU1/LAMP2/TFEB/PSAP/VAC14/DAB2/SLC12A4/MARCHF2/CLC…	116
	CC	GO:0032587	ruffle membrane	35/3802	95/19559	5.58777e-05	0.00248878	0.00217495	PDE9A/PLA2G4F/EPS8L3/RAC1/PSD/CIB1/EZR/DLC1/EPHA2/TLN1/LCP1/MTSS2/EPS8L1/FGD2/MYO6/EPS8L2/ITGA5/PDXP/ARHGEF2/NME1/SPRY2/THEM4/AIF1L/TPM1/ARHGEF4/TESC/PLEKHO1/EPS8/PTPRJ/ITGB3/MACF1/SPRY4/PLEKHA1/C2CD5/JCAD	35
	CC	GO:0030055	cell-substrate junction	115/3802	423/19559	5.7727e-05	0.00248878	0.00217495	IRF2/FZD1/CD99L2/MISP/TNS2/GRB7/ITGA3/CAT/ENG/LRP1/RAC1/FLNB/ANXA5/TSPAN9/ITGB2/TGM2/EZR/DLC1/ITGB4/TSPAN4/ASAP3/EPHA2/PALLD/ACTN1/HMGA1/TLN1/MAPRE2/DMD/CNN3/SLC9A3R2/LCP1/JUP/RSU1/RAC2/GNA12/ANXA6/FERMT3/NRP1/LPXN/ATAT1/ITGB7/YWHAZ/ITGB6/FERMT2/TLE2/LAP3/SNTB2/TRIOBP/SRP68/PTPRA/DIXDC1/SDCBP/CD81/GIT2/MSN/NUMB/FLRT3/CD9/SNTB1/THSD1/TES/ITGA5/SORBS1/PPIA/LIMD1/ARHGEF2/FZD2/DAB2/ITGA1/SCARF2/SYNE2…	115
	CC	GO:0070160	tight junction	44/3802	129/19559	5.9459e-05	0.00248878	0.00217495	CLDN4/EPCAM/CLDN2/CLDN23/SHROOM2/FZD5/CLDN7/PMP22/EPHA2/CGN/LSR/TGFBR1/SYNPO/WNK4/AOC1/ESAM/CLDN9/MXRA8/PARD6B/TRAF4/FRMD4A/RPGRIP1L/JAM3/EPB41L4B/CGNL1/ARHGEF2/CLDN1/MAPK15/CXADR/CCDC85C/CLDN3/SH3BP1/ANK3/MPP7/MPDZ/NHS/RAPGEF2/ECT2/ASH1L/POF1B/PARD6G/PARD6A/USP53/GJA1	44
	CC	GO:0045121	membrane raft	93/3802	329/19559	6.17366e-05	0.00249501	0.00218039	S100A10/VDAC1/KCNQ1/PTCH1/LRP8/PODXL/UNC5B/PLPP3/ITGB2/EZR/DLC1/UNC5A/NPC1/GPC1/ANXA2/CD14/PRNP/TGFBR1/RGS19/DMD/PRKAR2B/HSPD1/PLLP/TLR2/LYN/ABCG2/NTSR1/PRKACA/CBLC/SPRED1/HYAL2/TLR6/MAL2/CNTN1/GNAI2/DLL1/EEF2/BIRC3/PPT1/SDCBP/STX12/ADGRG1/APP/ERLIN2/MYO1A/BCL10/SORBS1/CSK/TNFRSF1B/LAMP2/BACE1/ITGA1/SLC2A1/CXADR/F2R/ADCY1/SHH/DPP4/MYOF/EGFR/RFTN1/EHD2/CD55/MALL/AKAP6/PLPP1/FYN/INPP5D/NOS1AP/MAPT/…	93
	CC	GO:0098589	membrane region	96/3802	343/19559	7.15179e-05	0.00279397	0.00244165	S100A10/VDAC1/KCNQ1/PTCH1/LRP8/PODXL/UNC5B/PLPP3/ITGB2/EZR/DLC1/UNC5A/NPC1/GPC1/ANXA2/CD14/PRNP/TGFBR1/RGS19/DMD/PRKAR2B/HSPD1/PLLP/TLR2/LYN/ABCG2/NTSR1/PRKACA/CBLC/SPRED1/HYAL2/TLR6/MAL2/CNTN1/GNAI2/DLL1/EEF2/BIRC3/PPT1/SDCBP/TRIP11/STX12/ADGRG1/APP/ERLIN2/MYO1A/BCL10/SORBS1/CSK/TNFRSF1B/LAMP2/BACE1/ITGA1/BICD2/SLC2A1/CXADR/F2R/ADCY1/SHH/DPP4/MYOF/EGFR/RFTN1/EHD2/CD55/MALL/AKAP6/PLPP1/FYN/INPP5D…	96
	CC	GO:0005912	adherens junction	53/3802	166/19559	8.51902e-05	0.00322074	0.0028146	PKP3/DSC2/ADAM15/PTPRM/STXBP6/CD99L2/BAIAP2L1/SHROOM2/SYNM/PLPP3/KRT18/ANXA2/TLN1/CNN3/JUP/NECTIN4/EPHA4/S100A11/SMAD7/ESAM/DLL1/NECTIN3/PDZD11/SDCBP/FRMD4A/CDH24/KIFC3/CDH3/SORBS1/LIMD1/CXADR/CCDC85C/NIBAN2/DCHS1/PDLIM1/NOTCH1/PLEKHA7/MYO1E/CTNND1/SH3BP1/CDCA3/TSPAN33/FRMD5/JAG1/VEGFA/TNK2/BMPR2/MPP7/NDRG1/AJUBA/POF1B/ARVCF/JCAD	53
	CC	GO:0005925	focal adhesion	112/3802	415/19559	9.90072e-05	0.00362614	0.00316888	IRF2/FZD1/CD99L2/MISP/TNS2/GRB7/ITGA3/CAT/ENG/LRP1/RAC1/FLNB/ANXA5/TSPAN9/ITGB2/TGM2/EZR/DLC1/ITGB4/TSPAN4/ASAP3/EPHA2/PALLD/ACTN1/HMGA1/TLN1/MAPRE2/CNN3/SLC9A3R2/LCP1/JUP/RSU1/RAC2/GNA12/ANXA6/NRP1/LPXN/ATAT1/ITGB7/YWHAZ/ITGB6/FERMT2/TLE2/LAP3/SNTB2/TRIOBP/SRP68/PTPRA/DIXDC1/SDCBP/CD81/GIT2/MSN/NUMB/FLRT3/CD9/SNTB1/THSD1/TES/ITGA5/SORBS1/PPIA/LIMD1/ARHGEF2/FZD2/DAB2/ITGA1/SCARF2/SYNE2/PDLIM1/DPP…	112
	CC	GO:0045178	basal part of cell	27/3802	69/19559	0.000118893	0.00422251	0.00369005	CLDN4/TACSTD2/BEST1/MET/MST1R/SLC27A1/LDLRAP1/ERBB2/AQP1/SLC23A2/PKD2/PRCP/CD81/MYO1A/ITGA9/ERBB3/PHLDB1/ITGA1/SLC12A2/EGFR/CHRM3/ANK3/BMPR2/ERBIN/ITGA6/EDN1/MUC20	27
	CC	GO:0030175	filopodium	37/3802	106/19559	0.000129655	0.00446928	0.0039057	ADGRA2/VIL1/HLA-G/ITGA3/PODXL/CIB1/EZR/DMD/LCP1/EPHA4/MYO5A/TIAM2/TBC1D10C/ANTXR1/IQGAP2/MYO6/CD302/APP/MSN/UTRN/CXADR/SYNE2/SCIMP/FSCN1/MAP2/DYNC1H1/OSBPL3/ITGB3/ACTA2/MYO1B/FAT1/FGD4/B4GALT1/ITGA6/ACP3/RDX/TTYH1	37
	CC	GO:0019898	extrinsic component of membrane	86/3802	306/19559	0.000141805	0.00474843	0.00414966	S100A6/SNX18/S100A10/MYZAP/PSD/WDR45B/EZR/STAC/ANXA2/PRNP/CDH17/CUBN/OTULINL/OSR1/JUP/GNB5/GNA12/LYN/CYLD/SMAD7/DMBT1/DLG4/FERMT2/PIK3R1/GNAI2/SARM1/SYK/GNAQ/GNAZ/GNA14/PTK6/VPS13D/NUMB/CDH24/SHANK3/KCNAB2/KPNA2/CDH3/SYTL3/PIK3CB/ERRFI1/VAC14/ZC3H12A/COQ8A/DCHS1/NUCB1/WDR81/MICALL1/CDH23/PAM16/EHD2/GNG10/PCSK9/STXBP5/CTNND1/STYK1/SERPINE2/FYN/PIK3CD/BST1/GNG5/SOCS3/SEC23A/GNB4/SYTL2/TEPSIN/VPS13A…	86
	CC	GO:0005923	bicellular tight junction	41/3802	122/19559	0.000151012	0.00491627	0.00429633	CLDN4/EPCAM/CLDN2/CLDN23/SHROOM2/FZD5/CLDN7/PMP22/CGN/TGFBR1/SYNPO/WNK4/AOC1/ESAM/CLDN9/MXRA8/PARD6B/TRAF4/FRMD4A/RPGRIP1L/JAM3/EPB41L4B/CGNL1/ARHGEF2/CLDN1/MAPK15/CXADR/CCDC85C/CLDN3/SH3BP1/ANK3/MPP7/MPDZ/NHS/RAPGEF2/ECT2/ASH1L/POF1B/PARD6G/PARD6A/USP53	41
	CC	GO:0030496	midbody	56/3802	182/19559	0.000165571	0.00524457	0.00458323	KLHL9/CCDC69/SEPTIN6/PTCH1/SEPTIN1/ARL2BP/RASGEF1B/ANXA2/IL16/TTC28/CHAMP1/CDCA8/CLIC4/CYLD/SIRT2/CHMP4C/TOPORS/GNAI2/LAP3/TRIOBP/MYH10/EXOC6/ANLN/ARL3/RAB11FIP3/PIK3CB/PDXP/SLC2A1/DDX11/BIRC5/RAB11FIP4/SPAG5/SSH1/CTNND1/AURKA/GEM/KATNB1/CEP55/ZFYVE26/TBCK/CNTRL/RAP2A/NEK2/TACC1/AURKB/CAPG/CENPC/ECT2/KIF4A/MTCL1/GNAI1/PLK1/CDK1/RDX/EXOC5/PRC1	56
	CC	GO:0030133	transport vesicle	109/3802	410/19559	0.000228348	0.00658553	0.00575509	PTPRN2/TMED10/CPE/ERG28/SYT17/SEPTIN6/VDAC1/SCAMP5/RAB40B/TPRG1L/PTPRS/HLA-G/SEPTIN1/MYRIP/SYT8/DISC1/SEPTIN4/ITPR1/CD74/SYNGR1/ICA1/BDNF/CRISPLD2/VAMP1/HLA-DRB1/SFTA2/PDE4B/SEC24D/SREBF2/SYT1/RAB3A/SYTL5/DLG4/WDR7/SYNGR2/NRSN2/UNC13B/CYB561/SEC23B/SNTB2/IQSEC1/RAB40C/BCL2L1/PPT1/RAB8B/TRIP11/STX12/C16orf70/APP/CCDC88A/KIF1B/DNM1/OVGP1/UNC13D/SYTL3/ATP13A2/EXOC3L1/SEC16A/BACE1/SSPN/FOLR1/STX4/RAB…	109
	CC	GO:0005765	lysosomal membrane	101/3802	375/19559	0.000229217	0.00658553	0.00575509	TSPAN1/COL6A1/VASN/VLDLR/PLA2G4F/LRP1/PIGR/CLN5/HLA-DMB/SLC39A8/NPC1/CD74/ANXA2/SYNGR1/CUBN/SLC39A14/HLA-DRB1/HLA-DMA/ATP6V1C2/ANXA6/AP2B1/RAB37/ELAPOR1/TLR3/HLA-DOB/GLIPR1/GPR143/LPCAT1/ATP6V1G1/AP1B1/ECE1/TMBIM1/CYB561/CCZ1B/MYO6/GNAQ/PRCP/AP5S1/VAMP8/CCZ1/TMEM150C/ATP13A2/TECPR1/NEU1/LAMP2/TFEB/PSAP/DAB2/SLC12A4/MARCHF2/CLCN6/STARD3/AP5M1/MTOR/CYBRD1/ITM2C/CLCN5/DAGLB/SLC15A3/EEF1A2/MMD/WDR81/…	101
	CC	GO:0098852	lytic vacuole membrane	101/3802	375/19559	0.000229217	0.00658553	0.00575509	TSPAN1/COL6A1/VASN/VLDLR/PLA2G4F/LRP1/PIGR/CLN5/HLA-DMB/SLC39A8/NPC1/CD74/ANXA2/SYNGR1/CUBN/SLC39A14/HLA-DRB1/HLA-DMA/ATP6V1C2/ANXA6/AP2B1/RAB37/ELAPOR1/TLR3/HLA-DOB/GLIPR1/GPR143/LPCAT1/ATP6V1G1/AP1B1/ECE1/TMBIM1/CYB561/CCZ1B/MYO6/GNAQ/PRCP/AP5S1/VAMP8/CCZ1/TMEM150C/ATP13A2/TECPR1/NEU1/LAMP2/TFEB/PSAP/DAB2/SLC12A4/MARCHF2/CLCN6/STARD3/AP5M1/MTOR/CYBRD1/ITM2C/CLCN5/DAGLB/SLC15A3/EEF1A2/MMD/WDR81/…	101
	CC	GO:0016327	apicolateral plasma membrane	11/3802	19/19559	0.000235879	0.00658553	0.00575509	CLDN4/KRT19/CLDN7/KRT8/JUP/THBD/CXADR/CLDN3/MPDZ/MTCL1/FZD6	11
	CC	GO:0030667	secretory granule membrane	85/3802	306/19559	0.000236	0.00658553	0.00575509	PTPRN2/TMED10/CPE/ABCA3/PIGR/DEGS1/DSP/RAC1/ITGB2/PTAFR/ITPR1/SRI/CD14/SYNGR1/ICA1/CEACAM3/TLR2/VAMP1/SNCA/ITPR2/DMBT1/ALDH3B1/STING1/RAB37/SYT1/RAB24/SLC27A2/RAB3A/TBC1D10C/GLIPR1/LPCAT1/IQGAP2/TMBIM1/LGALS3/DGAT1/TRIP11/ABCC4/PRCP/VAMP8/STK10/CD9/KCNAB2/FABP5/DOK3/ATP8B4/AGPAT2/TNFRSF1B/LAMP2/PTPRB/PSAP/RAB27B/RAP1A/CYBA/VAMP2/IGF2R/CD55/SERPINA5/PCSK4/SNAP29/BST1/RAB27A/CD109/AP2A2/CUZD1/PTPRJ…	85
	CC	GO:0008305	integrin complex	15/3802	31/19559	0.000260536	0.00710111	0.00620566	ITGA3/ITGB2/EMILIN1/ITGB4/LYN/ITGB7/ITGB6/ITGA9/ITGA5/ITGA1/NPNT/ITGB8/ITGB3/ITGA6/ITGA10	15
	CC	GO:0005769	early endosome	101/3802	377/19559	0.000282227	0.0075175	0.00656954	KCNQ1/FZD5/WASHC2A/HLA-G/ADRB2/LRP1/STEAP4/RASGEF1B/WASH6P/ANXA2/NEURL1B/DKK1/CORO1A/HSPD1/SLC39A14/MVB12B/LDLRAP1/MR1/EPHA4/RHOD/MYO5A/NRP1/WASF2/ERBB2/TLR3/TLR4/LIPG/FKBP15/FGD2/GGA3/STX12/APP/VAMP8/NUMB/TBC1D16/RAPGEF1/TRAK1/SNX1/USP10/PRDX3/HGS/BACE1/VAC14/DAGLA/SLC5A1/F2R/PHETA1/RAB11FIP5/CLCN5/PHB/RAP1A/NUCB1/HLA-E/WDR81/PARM1/SNX4/EGFR/RFTN1/EHD2/IGF2R/CXCR4/PCSK9/ZFYVE9/NTRK2/ATP6V0D1/SOR…	101
	CC	GO:0070382	exocytic vesicle	65/3802	223/19559	0.000295246	0.00758819	0.00663131	PTPRN2/SYT17/SEPTIN6/VDAC1/SCAMP5/RAB40B/TPRG1L/PTPRS/SEPTIN1/SYT8/DISC1/SEPTIN4/SYNGR1/ICA1/BDNF/VAMP1/PDE4B/SYT1/RAB3A/SYTL5/DLG4/WDR7/SYNGR2/UNC13B/IQSEC1/RAB40C/BCL2L1/PPT1/RAB8B/STX12/C16orf70/APP/KIF1B/DNM1/UNC13D/SYTL3/BACE1/STX4/RAB27B/CLCN5/BIN1/SLC2A8/VAMP2/STXBP5/ATP6V0D1/UNC13A/RAB27A/SLC40A1/STX19/WFS1/SYTL2/SLC18A2/SEPTIN5/STON2/DOC2A/MCTP2/HAP1/NKD2/DMXL2/SYNGR3/STX1A/SYTL1/TRIM9/R…	65
	CC	GO:0005770	late endosome	78/3802	278/19559	0.00029783	0.00758819	0.00663131	KCNQ1/HLA-DMB/RASGEF1B/NPC1/CD74/ANXA2/BAIAP3/TMEM25/SLC39A14/MVB12B/NMNAT2/MR1/HLA-DRB1/HLA-DMA/MYO5A/ANXA6/LGMN/ELAPOR1/CHMP4C/DDIT3/SNF8/SMIM22/CCZ1B/SLC31A2/CTSS/AP5S1/CTSL/VAMP8/CCZ1/CTSH/CST3/UNC13D/MAP1LC3A/ATP13A2/HGS/LAMP2/PSAP/BACE1/CHMP2B/VAC14/F2R/STARD3/AP5M1/RAB27B/RAP1A/MMD/WDR81/PARM1/MICALL1/EGFR/MON1B/IGF2R/CXCR4/PCSK9/TSPAN15/SORL1/OSBPL11/FYCO1/RAB27A/PLD3/LITAF/WASHC1/ATP7B/B…	78
	CC	GO:0042383	sarcolemma	43/3802	135/19559	0.000400334	0.00982168	0.00858316	PDE9A/SGCE/KRT19/COL6A1/SYNM/CIB1/KRT8/EZR/STAC/AHNAK2/ANXA2/SRI/DMD/SCN1B/LAMA2/TGFB3/AQP1/SGCB/COL6A3/SNTB1/CACNB3/UTRN/SLC2A1/SSPN/FKRP/BIN1/CACNA1D/AKAP6/KCNJ2/FLNC/NOS1AP/PEMT/CACNB2/ANK3/CACNA2D1/CCDC78/ATP2B4/CACNG4/PPP3CA/DYSF/RDX/RYR3/POPDC2	43
	CC	GO:0043202	lysosomal lumen	33/3802	96/19559	0.000402253	0.00982168	0.00858316	TXNDC5/CTSK/ARSB/GPC1/CD74/CUBN/SDC3/NPC2/EPDR1/VCAN/GPC4/LGMN/PLBD2/GALNS/PPT1/MAN2B1/CTSS/CTSL/FUCA1/ATP13A2/NEU1/LAMP2/PSAP/SMPD1/IFI30/MAN2B2/CSPG4/PLD3/ASAH1/CTSD/HPSE/SDC2/TCN2	33
	CC	GO:0055038	recycling endosome membrane	30/3802	85/19559	0.000435608	0.0102868	0.00898961	SCAMP5/ABHD17C/HLA-G/SLC39A4/RAC1/WASH6P/ABHD17B/BAIAP3/FZD7/GGA3/RAB8B/STX12/VAMP8/RAB11FIP3/ZFYVE27/RAB11FIP2/RAB11FIP4/RAB11FIP5/HLA-E/MICALL1/EHD2/ACAP1/SORL1/B2M/RAP2A/WASHC1/CLIP3/ABHD17A/INPP4A/NDRG1	30
	CC	GO:0019897	extrinsic component of plasma membrane	52/3802	172/19559	0.000443731	0.0102868	0.00898961	S100A6/SNX18/S100A10/MYZAP/STAC/ANXA2/CDH17/CUBN/JUP/GNB5/GNA12/LYN/CYLD/SMAD7/DLG4/FERMT2/GNAI2/SYK/GNAQ/GNAZ/GNA14/PTK6/NUMB/CDH24/SHANK3/KCNAB2/KPNA2/CDH3/SYTL3/ERRFI1/DCHS1/CDH23/GNG10/PCSK9/STXBP5/CTNND1/STYK1/SERPINE2/FYN/GNG5/GNB4/SYTL2/TNK2/GRAMD2A/HIP1/AKAP9/SRMS/GRAMD1A/PPP3CA/GNAI1/SYTL1/EEA1	52
	CC	GO:0031528	microvillus membrane	13/3802	26/19559	0.000447632	0.0102868	0.00898961	PODXL/S100P/EZR/CDHR5/PTPRH/CDHR2/MSN/PROM1/SLC6A6/ITGB3/SLC26A2/SYTL1/MUC20	13
	CC	GO:0005905	clathrin-coated pit	26/3802	71/19559	0.000537813	0.0121075	0.0105808	FNBP1/VLDLR/LRP1/SH3BP4/CDHR5/CUBN/HSPD1/LRP3/AP2B1/ATAT1/LRP12/FCHSD2/MYO6/APP/NUMB/LRP10/DAB2/AMN/AP1S3/ITSN1/AP2A2/SYNJ1/AP1S2/TNK2/FCHO2/CEMIP	26
	CC	GO:0098636	protein complex involved in cell adhesion	16/3802	36/19559	0.000547525	0.0121075	0.0105808	ITGA3/ITGB2/EMILIN1/ITGB4/LYN/ITGB7/ITGB6/JAM3/ITGA9/ITGA5/ITGA1/NPNT/ITGB8/ITGB3/ITGA6/ITGA10	16
	CC	GO:0042641	actomyosin	28/3802	79/19559	0.000616651	0.0133836	0.0116959	LIMCH1/MST1R/MYH14/FLNB/PALLD/ACTN1/LCP1/ROR1/NEBL/SYNPO/ABLIM3/MYO5A/FERMT2/KAT2B/MYH10/MYO18A/SORBS1/ABLIM1/PDLIM1/CYBA/HDAC4/FSCN1/TPM1/FHOD1/MYLK/CNN2/STX1A/MYL9	28
	CC	GO:0042581	specific granule	48/3802	160/19559	0.000867018	0.0184754	0.0161456	TCN1/DEGS1/ITGB2/JUP/CEACAM3/VAMP1/ALDH3B1/RAB37/AOC1/SLC27A2/TMBIM1/NFKB1/CRISP3/DGAT1/VAMP8/STK10/TIMP2/LCN2/KCNAB2/CXCL1/ATP8B4/AGPAT2/NEU1/TNFRSF1B/PTPRB/NIT2/STX4/RAP1A/CYBA/CFP/BST1/RAB27A/B2M/CRACR2A/CNN2/PTPRJ/STOM/PLAUR/SLPI/CTSD/HPSE/PLD1/QPCT/ATP11A/OSCAR/MMP25/HVCN1/ADAM8	48
	CC	GO:1904724	tertiary granule lumen	21/3802	55/19559	0.000958127	0.0200522	0.0175236	TCN1/FTH1/PRSS3/CRISP3/CSTB/CTSS/CTSH/CST3/TIMP2/CXCL1/NIT2/METTL7A/CFP/ALDOA/B2M/CDA/ASAH1/CNN2/CTSD/QPCT/OSCAR	21
	CC	GO:0017059	serine C-palmitoyltransferase complex	6/3802	8/19559	0.00104722	0.0208023	0.0181792	SPTLC3/ORMDL2/SPTLC2/SPTLC1/SPTSSB/SPTSSA	6
	CC	GO:0031211	endoplasmic reticulum palmitoyltransferase complex	6/3802	8/19559	0.00104722	0.0208023	0.0181792	SPTLC3/ORMDL2/SPTLC2/SPTLC1/SPTSSB/SPTSSA	6
	CC	GO:1905961	protein-cysteine S-palmitoyltransferase complex	6/3802	8/19559	0.00104722	0.0208023	0.0181792	SPTLC3/ORMDL2/SPTLC2/SPTLC1/SPTSSB/SPTSSA	6
	CC	GO:0031258	lamellipodium membrane	11/3802	22/19559	0.0012356	0.0241353	0.0210918	DOCK8/EPHA2/PLEK2/FERMT2/ANTXR1/PLXND1/PDXP/SYNE2/DPP4/CSPG4/ITGB3	11
	CC	GO:0097427	microtubule bundle	5/3802	6/19559	0.00139283	0.0260957	0.022805	ATAT1/MARK2/TPPP/MTCL1/TPPP3	5
	CC	GO:0150051	postsynaptic Golgi apparatus	5/3802	6/19559	0.00139283	0.0260957	0.022805	LRP1/MYO18A/GLG1/TPPP/FAM234B	5
	CC	GO:0005819	spindle	95/3802	367/19559	0.00140275	0.0260957	0.022805	CCDC69/PLEKHG6/SEPTIN6/MISP/EML1/ARL2BP/CDC6/MAPRE2/KLHL22/TTC28/CHAMP1/SPECC1L/NUP85/CDCA8/RSPH1/TAF1D/KAT2A/CYLD/SIRT2/ATAT1/HSPA2/FRY/MID1/CEP128/CDC20/PKD2/TOPORS/AKT1/SNCG/POC1A/CEP95/CEP104/FAM110C/KIFC2/MYH10/APP/KIFAP3/TPX2/ARL3/SKA3/ARHGEF2/PINX1/MAPK15/NIN/DDX11/BIRC5/RAB11FIP4/PLK2/TOGARAM2/TOGARAM1/ATM/SPAG5/CBX3/EPB41/FBXO5/NEDD9/KIF18B/AURKA/GEM/NEK6/KATNB1/TMEM201/TBCK/LATS1/SGO1/N…	95
	CC	GO:0002102	podosome	13/3802	29/19559	0.00162962	0.0291759	0.0254968	PALLD/ARHGEF5/LCP1/SH3PXD2A/FERMT3/LPXN/SCIN/ARHGEF2/SH3PXD2B/FSCN1/KIF9/AFAP1L1/ADAM8	13
	CC	GO:0002116	semaphorin receptor complex	7/3802	11/19559	0.00164301	0.0291759	0.0254968	PLXNC1/NRP1/PLXND1/PLXNB1/NRP2/PLXNB3/PLXNA3	7
	CC	GO:0002178	palmitoyltransferase complex	7/3802	11/19559	0.00164301	0.0291759	0.0254968	SPTLC3/GOLGA7B/ORMDL2/SPTLC2/SPTLC1/SPTSSB/SPTSSA	7
	CC	GO:0031594	neuromuscular junction	26/3802	76/19559	0.00171276	0.029532	0.025808	COL4A5/SYNGR1/EPHA4/VAMP1/LAMA2/PRKACA/DLG4/SYNGR2/UNC13B/FCHSD2/MYH10/APP/DLG2/ACHE/UTRN/FCHSD1/EFNA2/F2R/HDAC4/STXBP5/SERPINE2/UNC13A/ANK3/TUBA1A/SYNGR3/CDK5R1	26
	CC	GO:0055037	recycling endosome	54/3802	190/19559	0.00171346	0.029532	0.025808	KCNK1/ARHGAP44/SCAMP5/ABHD17C/HLA-G/SLC39A4/RAC1/WASH6P/ABHD17B/BAIAP3/LDLRAP1/FZD7/RAB25/MYO5A/SNF8/FCHSD2/DENND2B/GGA3/SLC31A2/RAB8B/STX12/APP/VAMP8/UNC13D/RAB11FIP3/ZFYVE27/RAB11FIP2/BACE1/FCHSD1/PHETA1/RAB11FIP4/RAB11FIP5/HLA-E/MICALL1/EHD2/ACAP1/SORL1/ITSN1/RAB11FIP1/B2M/RAP2A/WASHC1/RNF11/CLIP3/ABHD17A/INPP4A/TUBA1A/ATP11C/RAB29/NDRG1/ACKR4/ATP11A/EEA1/CLCN4	54
	CC	GO:0098978	glutamatergic synapse	93/3802	361/19559	0.00182834	0.0310552	0.0271392	CADPS2/EPHB2/NPTXR/ARHGAP44/PTPRS/ABHD17C/CLSTN3/RAC1/P2RY1/ABHD17B/ACTN1/DNM3/PLAT/PLCB4/PRKAR2B/CORO1A/HOMER2/CRTC1/FZD4/SYNPO/EPHA4/VAMP1/LYN/ABLIM3/SEMA3F/MYO5A/GPC4/NRP1/AP2B1/NRCAM/SYT1/YWHAZ/CLSTN1/DLG4/UNC13B/PPP2R2A/MYH10/NUMB/FLRT3/CAMK4/DLG2/DNM1/KPNA2/ARHGEF2/NCS1/CHMP2B/EGLN1/STXBP1/NPTN/MTOR/ADCY1/PURA/STX4/LRRC4/ADORA2A/RAP1A/IL1RAP/OPHN1/PPM1H/NRP2/FLNA/CTNND1/CHRM3/FYN/ITSN1/UNC1…	93
	CC	GO:0043218	compact myelin	8/3802	14/19559	0.0019704	0.0329902	0.0288301	PMP22/ANXA2/PLLP/SIRT2/JAM3/MBP/MPDZ/AKR1B1	8
	CC	GO:0031526	brush border membrane	21/3802	58/19559	0.00209207	0.0345339	0.0301792	SLC34A2/KCNK1/SLC26A6/SLC28A3/CDHR5/CUBN/CDHR2/GNA12/ABCG2/AQP1/SLC9A3/SLC46A1/AMN/SLC5A1/CYBRD1/FOLR1/HSP90AB1/NPC1L1/PEMT/B4GALT1/SLC19A1	21
	CC	GO:0008021	synaptic vesicle	57/3802	205/19559	0.00224926	0.036613	0.0319961	PTPRN2/SEPTIN6/VDAC1/SCAMP5/RAB40B/TPRG1L/PTPRS/SEPTIN1/SYT8/DISC1/SEPTIN4/SYNGR1/ICA1/BDNF/VAMP1/PDE4B/SYT1/RAB3A/DLG4/WDR7/SYNGR2/UNC13B/IQSEC1/RAB40C/BCL2L1/PPT1/RAB8B/STX12/C16orf70/APP/KIF1B/DNM1/BACE1/STX4/RAB27B/CLCN5/BIN1/SLC2A8/VAMP2/STXBP5/ATP6V0D1/UNC13A/SLC40A1/STX19/WFS1/SLC18A2/SEPTIN5/STON2/DOC2A/MCTP2/HAP1/DMXL2/SYNGR3/STX1A/TRIM9/RAB3B/CLCN4	57
	CC	GO:0031983	vesicle lumen	85/3802	328/19559	0.00233533	0.0374932	0.0327653	TXNDC5/TGFB2/TCN1/GAS6/CAT/THBS1/S100P/C3/TIMP3/ARSB/CYB5R3/CTSC/ANXA2/ACTN1/NPC2/JUP/CRISPLD2/S100A11/FERMT3/TGFB3/AOC1/COTL1/PSMD3/VAT1/NFKB1/EEF2/OSTF1/CRISP3/GALNS/CSTB/MAN2B1/SDCBP/APP/CTSH/FAM3C/TIMP2/FUCA1/LCN2/PSMD13/NME2/CXCL1/FABP5/UNC13D/GTPBP2/NEU1/PPIA/BACE1/NAPRT/PAFAH1B2/NIT2/CFD/PYCARD/TGFB1/PROS1/PYGB/SERPINA1/EGFR/CFP/ALDOA/CLEC3B/PSMD12/HSP90AB1/RAB27A/B2M/CDA/VEGFA/AMPD3/CRACR…	85
	CC	GO:0032059	bleb	6/3802	9/19559	0.00262325	0.0410737	0.0358943	ANLN/PANX1/TPM1/FHOD1/FMNL1/ROCK1	6
	CC	GO:0005884	actin filament	36/3802	118/19559	0.00262844	0.0410737	0.0358943	MISP/RAC1/EZR/PALLD/ACTN1/CORO1A/SPECC1L/LCP1/RAC2/GAS7/HCLS1/MYO5A/COBL/WIPF1/PKD2/COTL1/FKBP15/MYO6/WIPF3/SPECC1/JAM3/MYO1A/ESPN/MARK2/PDLIM1/AIF1L/TMOD1/FLNA/TPM1/FYN/EHBP1/MYO9B/MYO1B/CD2AP/GAS2/POF1B	36
	CC	GO:0005814	centriole	42/3802	143/19559	0.00272809	0.04207	0.0367649	DZIP1L/AKNA/MKS1/SIRT2/CCDC120/CEP128/TOPORS/KIAA0586/POC1A/CEP104/CCDC88A/CFAP20/IFT52/MAPK15/STARD9/NIN/OFD1/PLK2/CCDC68/AURKA/CCDC146/CEP55/WASHC1/MPHOSPH9/TSSK2/CEP19/CAPG/CCP110/TTBK2/CCDC78/CEP295NL/ALMS1/HAP1/RP2/CEP135/PLK1/TEDC2/STIL/PLK4/CNTLN/ROCK1/TOP2A	42
	CC	GO:0060205	cytoplasmic vesicle lumen	84/3802	326/19559	0.00292343	0.0444968	0.0388858	TXNDC5/TGFB2/TCN1/GAS6/CAT/THBS1/S100P/C3/TIMP3/ARSB/CYB5R3/CTSC/ANXA2/ACTN1/NPC2/JUP/CRISPLD2/S100A11/FERMT3/TGFB3/AOC1/COTL1/PSMD3/VAT1/NFKB1/EEF2/OSTF1/CRISP3/GALNS/CSTB/MAN2B1/SDCBP/APP/CTSH/FAM3C/TIMP2/FUCA1/LCN2/PSMD13/NME2/CXCL1/FABP5/UNC13D/GTPBP2/NEU1/PPIA/BACE1/NAPRT/PAFAH1B2/NIT2/CFD/PYCARD/TGFB1/PROS1/PYGB/SERPINA1/CFP/ALDOA/CLEC3B/PSMD12/HSP90AB1/RAB27A/B2M/CDA/VEGFA/AMPD3/CRACR2A/SE…	84
	CC	GO:0034774	secretory granule lumen	83/3802	322/19559	0.00304957	0.0458218	0.0400436	TXNDC5/TGFB2/TCN1/GAS6/CAT/THBS1/S100P/C3/TIMP3/ARSB/CYB5R3/CTSC/ANXA2/ACTN1/NPC2/JUP/CRISPLD2/S100A11/FERMT3/TGFB3/AOC1/COTL1/PSMD3/VAT1/NFKB1/EEF2/OSTF1/CRISP3/GALNS/CSTB/MAN2B1/SDCBP/APP/CTSH/FAM3C/TIMP2/FUCA1/LCN2/PSMD13/NME2/CXCL1/FABP5/UNC13D/GTPBP2/NEU1/PPIA/NAPRT/PAFAH1B2/NIT2/CFD/PYCARD/TGFB1/PROS1/PYGB/SERPINA1/CFP/ALDOA/CLEC3B/PSMD12/HSP90AB1/RAB27A/B2M/CDA/VEGFA/AMPD3/CRACR2A/SERPINI1…	83
	CC	GO:0031902	late endosome membrane	41/3802	140/19559	0.00322019	0.0471338	0.0411902	HLA-DMB/NPC1/ANXA2/BAIAP3/SLC39A14/MVB12B/MR1/HLA-DRB1/HLA-DMA/ANXA6/ELAPOR1/CHMP4C/SNF8/AP5S1/VAMP8/ATP13A2/HGS/LAMP2/CHMP2B/VAC14/STARD3/AP5M1/RAB27B/MMD/WDR81/MICALL1/TSPAN15/SORL1/OSBPL11/RAB27A/PLD3/LITAF/PLD1/PIP4P2/RHOB/NDFIP2/WDR91/LAMP3/MARCHF1/PIKFYVE/CLCN4	41
	CC	GO:0042827	platelet dense granule	10/3802	21/19559	0.00325754	0.0471338	0.0411902	TIMP3/ITPR1/ABCC4/FAM3C/LAMP2/RAB27B/CLEC3B/ITIH4/RARRES2/SELENOP	10
	CC	GO:0098644	complex of collagen trimers	10/3802	21/19559	0.00325754	0.0471338	0.0411902	COL4A4/COL4A5/COL4A3/COL1A1/COL16A1/COL7A1/COL5A2/COL4A6/COL4A1/COL27A1	10
	CC	GO:0031527	filopodium membrane	9/3802	18/19559	0.00345815	0.0494262	0.0431935	HLA-G/ITGA3/DMD/TBC1D10C/ANTXR1/UTRN/SYNE2/ITGB3/TTYH1	9
	MF	GO:0003779	actin binding	144/3725	437/18352	2.41921e-10	5.03439e-07	4.58632e-07	LIMCH1/VILL/BAIAP2L1/MISP/MYH14/SHROOM2/VIL1/EPS8L3/MYRIP/VASH1/ENC1/FLNB/EZR/PALLD/WASH6P/CGN/MYH11/ACTN1/TLN1/MAP1A/DMD/TNNI2/CORO1A/CNN3/HOMER2/LCP1/NEBL/SYNPO/MYOM2/GAS7/HCLS1/ABLIM3/SNCA/MYO5A/CFL2/ANXA6/COBL/TMSB10/WASF2/MTSS1/CAPZB/WIPF1/FERMT2/ANTXR1/IQGAP2/ABL1/MTSS2/COTL1/FKBP15/EPS8L1/SNTB2/TRIOBP/EEF2/MYO6/DIXDC1/MYH10/CORO2A/FHOD3/WIPF3/MSN/CCDC88A/SHANK3/SNTB1/MYO1A/STK38L/ANLN/ESPN…	144
	MF	GO:0019838	growth factor binding	57/3725	136/18352	7.29458e-09	7.59001e-06	6.91449e-06	COL6A1/VASN/HTRA1/IL1RN/IGFBP4/ENG/FGFR2/THBS1/FGFBP1/CCN1/ITGB4/GPC1/TGFBR1/IL1R1/LTBP4/IL1R2/LTBP2/IL6R/NRP1/TGFB3/ERBB2/SRPX2/DUSP1/HYAL2/COL1A1/RHBDF1/LTBP1/IL6ST/IGFBP7/CRIM1/TGFBR3/GLG1/ERBB3/ACVR1/CCN3/LTBP3/OSMR/CCN2/NRP2/EGFR/FGFR1/IGF2R/NTRK2/CD109/TWSG1/TRIM16/IL11RA/ITGB3/BMPR2/COL4A1/HAP1/NKD2/ITGA6/FGFRL1/IGFBP3/FGFR3/LIFR	57
	MF	GO:0031267	small GTPase binding	134/3725	428/18352	3.60537e-08	2.50093e-05	2.27834e-05	FGD3/ARHGAP44/STXBP6/TBC1D4/RAP1GAP/RASGRP4/RAC1/MYRIP/CIB1/ARHGEF28/SRGAP3/RGL1/TBC1D2B/RASGEF1B/ARHGEF17/SH3BP4/ANXA2/MYCBP2/ARHGEF5/TBC1D13/NCF2/VAV1/ARHGEF3/DOCK11/MYO5A/BICDL1/IPO11/TIAM2/GARRE1/MAPKAP1/RGP1/SYTL5/TBC1D10C/IQGAP2/UNC13B/MTSS2/EPS8L1/RCBTB2/RGL3/ARHGEF10L/TRIOBP/FGD2/DENND2B/TBC1D20/PARD6B/RANBP17/GGA3/RASGRP1/FGD6/KCTD13/ARHGEF37/TBC1D8/EVI5L/TBC1D16/RAPGEF1/CDC42EP3/ARHGEF1…	134
	MF	GO:0017016	Ras GTPase binding	130/3725	415/18352	5.55e-08	2.88739e-05	2.63041e-05	FGD3/ARHGAP44/STXBP6/TBC1D4/RAP1GAP/RASGRP4/RAC1/MYRIP/CIB1/ARHGEF28/SRGAP3/RGL1/TBC1D2B/RASGEF1B/ARHGEF17/SH3BP4/ANXA2/MYCBP2/ARHGEF5/TBC1D13/NCF2/VAV1/ARHGEF3/DOCK11/MYO5A/BICDL1/IPO11/TIAM2/GARRE1/MAPKAP1/RGP1/SYTL5/TBC1D10C/IQGAP2/UNC13B/MTSS2/EPS8L1/RCBTB2/RGL3/ARHGEF10L/TRIOBP/FGD2/DENND2B/TBC1D20/PARD6B/RANBP17/RASGRP1/FGD6/KCTD13/ARHGEF37/TBC1D8/EVI5L/TBC1D16/RAPGEF1/CDC42EP3/ARHGEF19/UNC…	130
	MF	GO:0050840	extracellular matrix binding	29/3725	57/18352	2.67731e-07	0.00011143	0.000101512	ITGA3/THBS1/CCN1/GPC1/ANXA2/ADAMTS15/DMBT1/LGALS3/NTN4/CTSS/ADGRG1/THSD1/ITGA9/ACHE/LYPD3/BCAM/SLIT2/SHH/PLEKHA2/SMOC1/VEGFA/TGFBI/LGALS1/TINAGL1/ITGB3/OLFML2A/ITGA6/SPOCK2/ADGRG6	29
	MF	GO:0051015	actin filament binding	69/3725	206/18352	5.84098e-06	0.00175698	0.00160061	VILL/MISP/MYH14/SHROOM2/VIL1/EZR/MYH11/ACTN1/TLN1/CORO1A/LCP1/NEBL/MYOM2/GAS7/HCLS1/ABLIM3/MYO5A/CFL2/ANXA6/CAPZB/FERMT2/ANTXR1/IQGAP2/ABL1/COTL1/TRIOBP/EEF2/MYO6/MYH10/CORO2A/FHOD3/MYO1A/ESPN/MYO18A/SCIN/SPTB/ABLIM1/UTRN/SYNE2/BIN1/ZNF185/IQGAP3/PANX1/EGFR/ABLIM2/AIF1L/MYO1E/TMOD1/FLNA/FSCN1/FSCN2/TPM1/TMEM201/FHOD1/FMNL1/CACNB2/TAGLN/CAPG/MYO7A/MYO1B/ITPRID2/HIP1/AJUBA/MACF1/GAS2/POF1B/FMNL3/AB…	69
	MF	GO:0043236	laminin binding	17/3725	29/18352	6.751e-06	0.00175698	0.00160061	ITGA3/THBS1/GPC1/LGALS3/NTN4/CTSS/ITGA9/ACHE/LYPD3/BCAM/SLIT2/SHH/PLEKHA2/LGALS1/TINAGL1/ITGA6/ADGRG6	17
	MF	GO:0005088	Ras guanyl-nucleotide exchange factor activity	44/3725	115/18352	6.75438e-06	0.00175698	0.00160061	FGD3/RASGRP4/ARHGEF28/RGL1/RASGEF1B/ARHGEF17/ARHGEF5/VAV1/ARHGEF3/DOCK11/TIAM2/RGP1/EPS8L1/RCBTB2/RGL3/ARHGEF10L/FGD2/DENND2B/RASGRP1/FGD6/ARHGEF37/RAPGEF1/ARHGEF19/EPS8L2/DENND2A/ARHGEF2/ARHGEF26/NGEF/DOCK4/RAP1A/ARHGEF4/RIN3/DENND4A/SBF1/EPS8/DOCK1/SH3BP5/ARHGEF18/RAPGEF2/FGD4/ECT2/RIC1/PLEKHG1/RASGRF2	44
	MF	GO:0004029	aldehyde dehydrogenase (NAD+) activity	11/3725	15/18352	1.43261e-05	0.00276812	0.00252175	ALDH1A1/ALDH1A2/ALDH3A1/ALDH3B1/ALDH9A1/ALDH1B1/ALDH2/ALDH4A1/ALDH1A3/ALDH1L2/ALDH3B2	11
	MF	GO:0042813	Wnt-activated receptor activity	11/3725	15/18352	1.43261e-05	0.00276812	0.00252175	FZD1/FZD8/FZD5/ROR1/FZD4/FZD7/LRP5/FZD2/PKD1/LRP6/FZD6	11
	MF	GO:0005085	guanyl-nucleotide exchange factor activity	70/3725	215/18352	1.49408e-05	0.00276812	0.00252175	EIF2B2/FGD3/PLEKHG6/DOCK8/RASGRP4/PSD/RIC8B/ARHGEF28/RGL1/RASGEF1B/ARHGEF17/MYCBP2/ARHGEF5/VAV1/ARHGEF3/DOCK11/FBXO8/TIAM2/ARHGEF40/CCDC88C/RGP1/EPS8L1/RCBTB2/DOCK9/RGL3/RAPGEFL1/ARHGEF10L/IQSEC1/FGD2/DENND2B/RASGRP1/FGD6/ARHGEF37/HERC1/CYTH4/CCZ1/CCDC88A/RAPGEF1/ARHGEF19/EPS8L2/DENND2A/ARHGEF2/ARHGEF26/NGEF/SH2D3A/DOCK4/RAP1A/NUCB1/SOS2/ITSN1/ARHGEF4/RIN3/DIS3/DENND4A/SBF1/EPS8/ARFGEF3/DOCK5/DOC…	70
	MF	GO:0001972	retinoic acid binding	13/3725	20/18352	1.77213e-05	0.00276812	0.00252175	NR2F2/CYP2W1/RXRA/UGT1A8/UGT1A9/UGT1A3/UGT1A7/UGT1A1/FABP5/IGF2R/SERPINA5/LRAT/CYP26B1	13
	MF	GO:0005096	GTPase activator activity	85/3725	275/18352	1.84256e-05	0.00276812	0.00252175	PLEKHG6/ARHGAP44/ALDH1A1/TBC1D4/RAP1GAP/RIC8B/RASAL1/SRGAP3/TBC1D2B/DLC1/ASAP3/SIPA1L1/TBC1D13/GNB5/ALS2CL/NRP1/RGS5/ADAP1/TIAM2/TBC1D10C/IQGAP2/MTSS2/DAB2IP/SMAP2/SEC23B/ARHGEF10L/TBC1D20/RGS3/GNAQ/PLXNB1/TBC1D8/EVI5L/ARHGAP27/GIT2/TBC1D16/ARHGEF19/TBC1D9/ERRFI1/RIN1/CHN1/STARD13/DOCK4/AGFG2/RALGAPA2/RASA4/OPHN1/IQGAP3/SGSM3/RASA4B/ACAP1/STXBP5/SH3BP1/ARHGAP42/USP6NL/ARHGAP31/GMIP/RIN3/RGS16/TBC…	85
	MF	GO:0030695	GTPase regulator activity	93/3725	307/18352	1.86226e-05	0.00276812	0.00252175	PLEKHG6/ARHGAP44/ALDH1A1/TBC1D4/RAP1GAP/ARL2BP/RIC8B/RASAL1/SRGAP3/TBC1D2B/DLC1/ASAP3/SH3BP4/SIPA1L1/TBC1D13/GNB5/ALS2CL/NRP1/RGS5/ADAP1/TIAM2/TBC1D10C/IQGAP2/MTSS2/DAB2IP/SMAP2/SEC23B/ARHGEF10L/GPSM3/TBC1D20/RGS3/GNAQ/PLXNB1/TBC1D8/EVI5L/ARHGAP27/GIT2/TBC1D16/CCDC88A/ARHGEF19/TBC1D9/ERRFI1/RIN1/SLIT2/CHN1/STARD13/DOCK4/RTKN/AGFG2/RALGAPA2/RASA4/OPHN1/IQGAP3/SGSM3/RASA4B/ACAP1/STXBP5/SH3BP1/ARHGA…	93
	MF	GO:0060589	nucleoside-triphosphatase regulator activity	102/3725	348/18352	3.42541e-05	0.00457683	0.00416949	PLEKHG6/ARHGAP44/ALDH1A1/TBC1D4/RAP1GAP/ARL2BP/RIC8B/RASAL1/SRGAP3/TBC1D2B/DLC1/ASAP3/SH3BP4/SIPA1L1/TBC1D13/GNB5/TOR1AIP1/ALS2CL/NRP1/RGS5/ADAP1/TIAM2/RAB3A/TBC1D10C/IQGAP2/MTSS2/DAB2IP/SMAP2/SEC23B/ARHGEF10L/GPSM3/TBC1D20/RGS3/GNAQ/PLXNB1/TBC1D8/EVI5L/ARHGAP27/GIT2/TBC1D16/CCDC88A/ARHGEF19/TBC1D9/ERRFI1/BRSK2/RIN1/SLIT2/CHN1/STARD13/DOCK4/RTKN/AGFG2/RALGAPA2/HSPH1/RASA4/OPHN1/IQGAP3/SGSM3/RASA4…	102
	MF	GO:0005178	integrin binding	50/3725	144/18352	3.71402e-05	0.00457683	0.00416949	FBLN5/ADAM15/TSPAN8/ITGA3/THBS1/PLPP3/CCN1/ITGB2/EMILIN1/ITGB4/TSPAN4/ACTN1/CDH17/TLN1/LTBP4/COL4A3/LCP1/ICAM3/LYN/FERMT3/ITGB7/LAMB1/ITGB6/FBN1/FERMT2/TNXB/SYK/COL16A1/LAMA3/CD81/TIMP2/CD9/JAM3/ITGA5/UTRN/CCN3/CXADR/CCN2/ISG15/S1PR3/EGFR/NPNT/S1PR2/FRMD5/ITGB8/TGFBI/ITGB3/ICAM1/MMP14/FGF2	50
	MF	GO:0004030	aldehyde dehydrogenase [NAD(P)+] activity	11/3725	16/18352	3.73888e-05	0.00457683	0.00416949	ALDH1A1/ALDH1A2/ALDH3A1/ALDH3B1/ALDH9A1/ALDH1B1/ALDH2/ALDH4A1/ALDH1A3/ALDH1L2/ALDH3B2	11
	MF	GO:0005089	Rho guanyl-nucleotide exchange factor activity	26/3725	60/18352	4.33201e-05	0.00474469	0.00432241	FGD3/ARHGEF28/ARHGEF17/ARHGEF5/VAV1/ARHGEF3/DOCK11/TIAM2/EPS8L1/ARHGEF10L/FGD2/FGD6/ARHGEF37/ARHGEF19/EPS8L2/ARHGEF2/ARHGEF26/NGEF/DOCK4/ARHGEF4/EPS8/DOCK1/ARHGEF18/FGD4/ECT2/PLEKHG1	26
	MF	GO:0098631	cell adhesion mediator activity	26/3725	60/18352	4.33201e-05	0.00474469	0.00432241	EPCAM/PKP3/DSC2/STXBP6/BAIAP2L1/DSP/EMILIN1/KRT18/PALLD/ANXA2/CNN3/JUP/S100A11/NRCAM/ESAM/IGSF9/DSG2/JAM3/BCAM/ITGA1/CXADR/NPTN/PDLIM1/PLXNB3/SIRPA/ITGA10	26
	MF	GO:0019955	cytokine binding	47/3725	135/18352	5.80546e-05	0.00604058	0.00550297	VASN/IL1RN/ENG/IL22RA1/THBS1/PLP2/CCRL2/IL18R1/CD74/TGFBR1/ZFP36/IL3RA/IL1R1/LTBP4/IL1R2/FZD4/IL6R/NRP1/TGFB3/CSF2RA/HYAL2/LTBP1/IL6ST/IL27RA/TGFBR3/TNFRSF1B/ACVR1/NBL1/LTBP3/OSMR/NRP2/CXCR4/IL20RB/KLHL20/CD109/TWSG1/TRIM16/IL11RA/ITGB3/BMPR2/LEPR/TNFRSF11A/ACKR4/TMC8/GBP1/LIFR/FGF2	47
	MF	GO:0005543	phospholipid binding	126/3725	454/18352	7.14189e-05	0.00707727	0.00644739	GSDMB/LPAR1/SNX18/SYT17/ARHGAP44/PLA2G4F/KCNQ1/VILL/STXBP6/VIL1/GAS6/GRB7/PSD/SYT8/THBS1/RASAL1/ANXA5/WDR45B/PTAFR/GOLPH3/ITPR1/ANXA2/BAIAP3/TLN1/VEPH1/CEACAM5/SH3PXD2A/LDLRAP1/PLEK2/FZD7/PLA2G4A/SNCA/ITPR2/ANXA6/ADAP1/SYT1/ANXA4/MAPKAP1/SDCBP2/PLA2G10/SYTL5/FERMT2/IQGAP2/UNC13B/MTSS2/AKT1/DAB2IP/SNX30/FCHSD2/FGD2/RASGRP1/PPT1/SNX29/SDCBP/PCTP/CCDC88A/SNX1/NUP62CL/GSDME/MAP1LC3A/SYTL3/ATP13A2/GRK…	126
	MF	GO:0019199	transmembrane receptor protein kinase activity	31/3725	80/18352	0.000112077	0.0102563	0.00934347	EPHB2/EPHB3/MET/MST1R/ENG/FGFR2/EPHA2/EPHA10/EFEMP1/TGFBR1/LTBP4/EPHA4/NRP1/ERBB2/BMPR1B/LTBP1/CRIM1/TGFBR3/ERBB3/ACVR1/NRP2/EPHA1/EGFR/FGFR1/IGF2R/NTRK2/BMPR2/AXL/FGFRL1/FGFR3/EFNA3	31
	MF	GO:0005201	extracellular matrix structural constituent	55/3725	169/18352	0.000118137	0.0102563	0.00934347	MATN2/LAMC2/COL6A1/SRPX/FBLN5/COL4A4/FRAS1/MUC6/TUFT1/THBS1/CCN1/EMILIN1/EFEMP1/COL4A5/LAMB3/MFAP4/LTBP4/COL4A3/EMILIN3/VCAN/LTBP2/PCOLCE/LAMA2/SRPX2/LAMB1/COL12A1/FBN1/EMILIN2/TNXB/COL1A1/LTBP1/COL16A1/LAMA3/COL6A3/IGFBP7/CRELD1/COL7A1/COL5A2/VWA1/FBLN1/MUC4/LAMC1/THSD4/COL4A6/MUC3A/NPNT/COL9A3/TGFBI/TINAGL1/EFEMP2/COL4A1/NID2/MXRA5/TNC/COL27A1	55
	MF	GO:0017124	SH3 domain binding	45/3725	131/18352	0.000118285	0.0102563	0.00934347	ADAM15/DTX1/HCLS1/LYN/WASF2/AFAP1L2/WIPF1/CBLC/ABL1/CCDC6/DAB2IP/OSTF1/KHDRBS3/QKI/ARHGAP27/WIPF3/SHANK3/RAPGEF1/DNM1/ESPN/SH3BGRL/ERRFI1/MAPK15/DOCK4/ZNF106/CYBA/RAD9A/SH3BP1/ARHGAP31/DNAJC6/INPP5D/PTTG1/MAPT/PLSCR4/NCKIPSD/DOCK1/EVL/SYNJ1/SH3BP5/SH3BGR/AFAP1L1/CD2AP/SIRPA/ELMO3/GJA1	45
	MF	GO:0017048	Rho GTPase binding	53/3725	162/18352	0.000133696	0.0111288	0.0101383	FGD3/ARHGAP44/STXBP6/ARHGEF28/SRGAP3/ARHGEF17/ARHGEF5/NCF2/VAV1/ARHGEF3/DOCK11/TIAM2/GARRE1/IQGAP2/MTSS2/EPS8L1/ARHGEF10L/TRIOBP/FGD2/PARD6B/FGD6/KCTD13/ARHGEF37/CDC42EP3/ARHGEF19/ANLN/EPS8L2/ARHGEF2/ARHGEF26/NGEF/DOCK4/RTKN/IQGAP3/KIAA1614/FLNA/SH3BP1/SRGAP2C/ARHGEF4/FMNL1/EPS8/STRN3/MYO9B/DOCK1/ARHGDIB/ARHGEF18/FGD4/ECT2/PLEKHG1/PARD6G/PARD6A/FMNL3/ELMO3/ROCK1	53
	MF	GO:0050431	transforming growth factor beta binding	13/3725	23/18352	0.000141028	0.0112877	0.0102831	VASN/ENG/THBS1/TGFBR1/LTBP4/TGFB3/HYAL2/LTBP1/TGFBR3/ACVR1/LTBP3/CD109/TWSG1	13
	MF	GO:0016620	oxidoreductase activity, acting on the aldehyde or oxo group of donors, NAD or NADP as acceptor	17/3725	35/18352	0.00016824	0.0128179	0.0116771	ALDH1A1/ALDH1A2/AKR1C4/ALDH3A1/ALDH3B1/ALDH6A1/ALDH9A1/AKR1B10/ALDH18A1/ALDH1B1/GAPDH/ALDH2/ALDH4A1/ALDH1A3/AKR1B1/ALDH1L2/ALDH3B2	17
	MF	GO:0016757	transferase activity, transferring glycosyl groups	81/3725	275/18352	0.00017534	0.0128179	0.0116771	B4GALNT3/FUT6/GCNT1/ST3GAL5/ST8SIA4/B3GNT3/POGLUT3/ST3GAL1/B3GNT9/GALNT10/ST3GAL4/ST6GALNAC6/CSGALNACT1/ABO/ST6GAL1/GALNT11/GALNT18/GALNT2/EXTL3/CSGALNACT2/FUT4/FUT3/ST3GAL3/SIRT2/PARP8/MGAT2/PARP12/GCNT4/UGT1A8/EXT1/UGT1A9/UGT1A3/UGT1A7/UGT1A5/UGT1A4/ST6GALNAC2/CHSY1/UGT1A10/ST6GALNAC1/UGT1A1/ALG8/GALNT4/UGT1A6/PGAP4/MGAT5/B4GALT6/UPP1/ST6GALNAC4/MGAT4B/ST3GAL6/NAPRT/PARP11/ST3GAL2/PYGB/A4GALT/B…	81
	MF	GO:0098632	cell-cell adhesion mediator activity	22/3725	51/18352	0.000178625	0.0128179	0.0116771	EPCAM/PKP3/DSC2/STXBP6/BAIAP2L1/DSP/KRT18/PALLD/ANXA2/CNN3/JUP/S100A11/NRCAM/ESAM/IGSF9/DSG2/JAM3/CXADR/NPTN/PDLIM1/PLXNB3/SIRPA	22
	MF	GO:0005041	low-density lipoprotein particle receptor activity	9/3725	13/18352	0.000186026	0.012904	0.0117555	VLDLR/LRP8/LRP1/LRP12/STAB1/LRP10/CXCL16/SORL1/LRP6	9
	MF	GO:0033293	monocarboxylic acid binding	28/3725	72/18352	0.000219943	0.0144877	0.0131982	FABP3/NR2F2/STARD5/CYP2W1/PPARG/RXRA/AKR1C4/VDR/UGT1A8/UGT1A9/UGT1A3/UGT1A7/ACOX1/UGT1A1/NME2/FABP5/SCP2/GSTA1/PSAP/ACACB/IGF2R/NDUFAB1/DBT/SERPINA5/LRAT/HNF4A/CYP4F11/CYP26B1	28
	MF	GO:0008373	sialyltransferase activity	12/3725	21/18352	0.00022278	0.0144877	0.0131982	ST3GAL5/ST8SIA4/ST3GAL1/ST3GAL4/ST6GALNAC6/ST6GAL1/ST3GAL3/ST6GALNAC2/ST6GALNAC1/ST6GALNAC4/ST3GAL6/ST3GAL2	12
	MF	GO:0004713	protein tyrosine kinase activity	45/3725	135/18352	0.000258374	0.0158405	0.0144307	EPHB2/EPHB3/MET/MST1R/FGFR2/EPHA2/EPHA10/EFEMP1/EPHA4/LYN/NRP1/ERBB2/HIPK2/DYRK3/ABL1/SYK/PTK6/NEK1/CRIM1/ERBB3/CSK/NRP2/EPHA1/EGFR/FGFR1/IGF2R/STYK1/NTRK2/FYN/DSTYK/PEAK1/DYRK1A/PKDCC/TNK2/MELK/AXL/SRMS/WEE1/FGFRL1/JAK3/HIPK1/FGFR3/ABL2/TTK/EFNA3	45
	MF	GO:0005501	retinoid binding	17/3725	36/18352	0.000258807	0.0158405	0.0144307	NR2F2/CYP2W1/ALDH1A2/RBP5/RXRA/UGT1A8/UGT1A9/UGT1A3/UGT1A7/STRA6/UGT1A1/FABP5/IGF2R/SERPINA5/LRAT/C8G/CYP26B1	17
	MF	GO:0016903	oxidoreductase activity, acting on the aldehyde or oxo group of donors	19/3725	43/18352	0.000334675	0.0193355	0.0176146	ALDH1A1/ALDH1A2/AKR1C4/ALDH3A1/ALDH3B1/ALDH6A1/ALDH9A1/BCKDHA/AKR1B10/ALDH18A1/FMO5/ALDH1B1/GAPDH/ALDH2/ALDH4A1/ALDH1A3/AKR1B1/ALDH1L2/ALDH3B2	19
	MF	GO:0004758	serine C-palmitoyltransferase activity	5/3725	5/18352	0.000343783	0.0193355	0.0176146	SPTLC3/SPTLC2/SPTLC1/SPTSSB/SPTSSA	5
	MF	GO:0016454	C-palmitoyltransferase activity	5/3725	5/18352	0.000343783	0.0193355	0.0176146	SPTLC3/SPTLC2/SPTLC1/SPTSSB/SPTSSA	5
	MF	GO:0019840	isoprenoid binding	17/3725	37/18352	0.000388826	0.0212933	0.0193982	NR2F2/CYP2W1/ALDH1A2/RBP5/RXRA/UGT1A8/UGT1A9/UGT1A3/UGT1A7/STRA6/UGT1A1/FABP5/IGF2R/SERPINA5/LRAT/C8G/CYP26B1	17
	MF	GO:0019001	guanyl nucleotide binding	108/3725	397/18352	0.000504696	0.0262568	0.0239199	EIF2B2/SEPTIN6/RAB40B/SEPTIN1/RAC1/MRAS/SAMHD1/TGM2/SEPTIN4/GUCY1B1/CPLANE2/ARHGEF5/DNM3/ARL16/ATL1/MOCS1/RAC2/EFTUD2/GNA12/RHOD/RAB25/ANXA6/STING1/RAB37/RAB24/GCH1/RAB3A/FKBP4/GNAI2/RAB2B/EEF2/CIITA/RANBP17/GNAQ/GNAZ/RAB40C/GNA14/RAB8B/ARL14/PDE5A/RAB6B/RHOV/NPR2/NME2/RASL11A/DNM1/ARL3/SRP54/RAB33B/GTPBP2/URGCP/RHOC/NME1/NIN/RTKN/ARL13B/MFN2/RHOBTB3/ERAL1/RAB27B/RAP1A/EEF1A2/CNGA1/MTIF2/ARL15/HH…	108
	MF	GO:0032561	guanyl ribonucleotide binding	108/3725	397/18352	0.000504696	0.0262568	0.0239199	EIF2B2/SEPTIN6/RAB40B/SEPTIN1/RAC1/MRAS/SAMHD1/TGM2/SEPTIN4/GUCY1B1/CPLANE2/ARHGEF5/DNM3/ARL16/ATL1/MOCS1/RAC2/EFTUD2/GNA12/RHOD/RAB25/ANXA6/STING1/RAB37/RAB24/GCH1/RAB3A/FKBP4/GNAI2/RAB2B/EEF2/CIITA/RANBP17/GNAQ/GNAZ/RAB40C/GNA14/RAB8B/ARL14/PDE5A/RAB6B/RHOV/NPR2/NME2/RASL11A/DNM1/ARL3/SRP54/RAB33B/GTPBP2/URGCP/RHOC/NME1/NIN/RTKN/ARL13B/MFN2/RHOBTB3/ERAL1/RAB27B/RAP1A/EEF1A2/CNGA1/MTIF2/ARL15/HH…	108
	MF	GO:0046332	SMAD binding	29/3725	79/18352	0.000535499	0.0271798	0.0247608	PRDM16/ZMIZ1/SMAD4/AXIN2/HMGA2/GATA4/TGFBR1/FOXH1/SMAD7/SMAD3/BMPR1B/HIPK2/SAV1/TOB1/TCF12/SMAD1/TGFBR3/COL5A2/ACVR1/DAB2/SKI/PURA/PPM1A/MEF2A/FLNA/PAX6/EID2/SKIL/JUN	29
	MF	GO:0017022	myosin binding	27/3725	72/18352	0.000558408	0.0276678	0.0252054	LIMCH1/MYRIP/DMD/CORO1A/RAB25/RAB3A/TRIOBP/RAB6B/TRAK1/TRIM32/RAB27B/SPATA6L/PYCARD/SPATA6/IQGAP3/CXCR4/STXBP5/RAB27A/NPC1L1/LLGL2/AXL/HAP1/NKD2/LARP6/STX1A/MYL9/RAB3B	27
	MF	GO:0017154	semaphorin receptor activity	8/3725	12/18352	0.000642893	0.0304059	0.0276998	MET/PLXNC1/NRP1/PLXND1/PLXNB1/NRP2/PLXNB3/PLXNA3	8
	MF	GO:0031543	peptidyl-proline dioxygenase activity	8/3725	12/18352	0.000642893	0.0304059	0.0276998	P3H1/P3H3/P4HA2/EGLN1/EGLN3/P4HTM/P3H2/P4HA3	8
	MF	GO:0004674	protein serine/threonine kinase activity	116/3725	435/18352	0.000721784	0.0322101	0.0293434	RPS6KL1/RPS6KA2/PSKH1/PRKCH/NEK9/ERN2/ENG/IRAK2/FAM20C/PIM2/MAST4/EIF2AK1/TGFBR1/LTBP4/NUAK1/SGK1/RIPK4/MAP3K3/MAPK11/MAPKAPK2/WNK4/CDK6/PRKACA/BMPR1B/CDK3/CDK14/HIPK2/WNK2/DYRK3/AKT1/PHKB/SYK/LTBP1/PRKD1/NEK1/MAP3K20/STK10/CAMK4/NME2/STK38L/SGK2/HTATIP2/MARK2/TGFBR3/GRK5/MAP3K4/SIK2/BRSK2/ACVR1/VRK2/MAPK15/MTOR/PHKG2/PLK2/STK40/MAST2/GRK2/ATM/GRK3/EGFR/EIF2AK3/CDK20/AURKA/NEK6/PRKACB/DSTYK/MAPK7…	116
	MF	GO:0004879	nuclear receptor activity	21/3725	52/18352	0.000727475	0.0322101	0.0293434	NR2F2/NR2F1/RORC/PPARG/RXRA/RORA/VDR/ESRRG/NR3C2/NR1D1/ESR2/NR4A1/HNF4G/ARNT/RARB/NKX3-1/THRB/NR2C1/HNF4A/NR6A1/NR4A2	21
	MF	GO:0098531	ligand-activated transcription factor activity	21/3725	52/18352	0.000727475	0.0322101	0.0293434	NR2F2/NR2F1/RORC/PPARG/RXRA/RORA/VDR/ESRRG/NR3C2/NR1D1/ESR2/NR4A1/HNF4G/ARNT/RARB/NKX3-1/THRB/NR2C1/HNF4A/NR6A1/NR4A2	21
	MF	GO:0004559	alpha-mannosidase activity	9/3725	15/18352	0.000874716	0.0371486	0.0338424	MAN1C1/MAN1A1/MAN2B1/EDEM1/MAN2B2/MANEA/MAN1A2/MAN2A1/EDEM3	9
	MF	GO:0005161	platelet-derived growth factor receptor binding	9/3725	15/18352	0.000874716	0.0371486	0.0338424	PDGFC/PDGFD/IL1R1/LYN/ITGA5/VEGFA/PTPRJ/ITGB3/ERN1	9

## Sheet: Table S5
Table S5. Significantly enriched gene ontology (GO) terms of over representative features in P68 cholangiocarcinoma organoids compared to benign biliary organoids.
	ONTOLOGY	ID	Description	GeneRatio	BgRatio	p value	p.adjust	q value	geneID	Count
	BP	GO:0007156	homophilic cell adhesion via plasma membrane adhesion molecules	65/1994	168/18866	7.45168e-22	6.43974e-18	5.43188e-18	CEACAM5/PCDHA12/NECTIN4/PCDHA11/PCDHAC1/AMIGO2/PCDHA8/PCDHA1/ESAM/PCDHA9/PCDHA5/PCDHA2/PCDHA6/PCDHA3/CDH17/PCDHA4/PCDHA13/PCDHA10/PCDHA7/PTPRM/NECTIN2/PVR/CELSR3/PCDHB14/PCDHGC3/CLSTN3/PCDHAC2/PLXNB3/CDH24/PCDH1/PCDHGA10/PCDHGB4/PCDHGA11/PCDHGA4/PCDHGB6/PCDHGA7/PCDHGB1/CDH26/PALLD/PCDHGB3/PCDHGA2/CELSR2/PCDHGC5/PCDHGA12/PCDHGA3/PCDHGA8/PCDHGA1/PLXNB2/PCDHGC4/PCDHGB7/PCDHGA5/ROBO1/PCDHGA6/CADM1/PC…	65
	BP	GO:0098742	cell-cell adhesion via plasma-membrane adhesion molecules	85/1994	277/18866	2.32319e-20	1.00385e-16	8.4674e-17	CEACAM5/FXYD5/KIFAP3/PCDHA12/BMP2/NECTIN4/PCDHA11/PCDHAC1/AMIGO2/MMP24/EFNA5/CLDN4/PCDHA8/PCDHA1/ESAM/PCDHA9/PCDHA5/PCDHA2/PCDHA6/PCDHA3/CDH17/PCDHA4/PCDHA13/PCDHA10/PCDHA7/PTPRM/CLDN2/TGFB2/KLF4/NECTIN2/PVR/CELSR3/PCDHB14/ITGA5/PTPRS/PCDHGC3/CLSTN3/PCDHAC2/GPC4/PLXNB3/CDH24/PCDH1/PCDHGA10/PCDHGB4/PCDHGA11/PCDHGA4/PCDHGB6/PCDHGA7/PCDHGB1/CDH26/PALLD/PCDHGB3/PCDHGA2/CELSR2/PCDHGC5/PCDHGA12/PCDHGA3…	85
	BP	GO:0030198	extracellular matrix organization	95/1994	395/18866	7.62863e-15	1.94903e-11	1.644e-11	MMP1/AGT/LOXL4/GAS6/LCP1/HSPG2/MMP7/SCUBE1/CCN1/LAMB1/MMP24/LRP1/TGFBI/FBLN5/FN1/PAPLN/ITGB7/TLL2/COL6A1/COL11A2/ADAMTS9/POMT1/THBS1/TIMP2/VCAN/CCN2/TGFB2/THSD4/MIA/ITGA10/NPNT/MYH11/BMP1/COL7A1/ITGA5/COL4A5/ADAM15/ITGB6/MELTF/ADAM8/CTSL/ITGA1/COL18A1/AGRN/KAZALD1/ENG/TGFBR1/CFLAR/EMILIN1/PHLDB2/NTN4/VWA1/PDGFB/ADAMTSL5/FERMT1/LOXL1/COL4A4/LTBP3/PXDN/COL4A6/COL12A1/COL9A3/SPOCK2/ADAMTS1/CAV2/TIMP…	95
	BP	GO:0043062	extracellular structure organization	95/1994	396/18866	9.02121e-15	1.94903e-11	1.644e-11	MMP1/AGT/LOXL4/GAS6/LCP1/HSPG2/MMP7/SCUBE1/CCN1/LAMB1/MMP24/LRP1/TGFBI/FBLN5/FN1/PAPLN/ITGB7/TLL2/COL6A1/COL11A2/ADAMTS9/POMT1/THBS1/TIMP2/VCAN/CCN2/TGFB2/THSD4/MIA/ITGA10/NPNT/MYH11/BMP1/COL7A1/ITGA5/COL4A5/ADAM15/ITGB6/MELTF/ADAM8/CTSL/ITGA1/COL18A1/AGRN/KAZALD1/ENG/TGFBR1/CFLAR/EMILIN1/PHLDB2/NTN4/VWA1/PDGFB/ADAMTSL5/FERMT1/LOXL1/COL4A4/LTBP3/PXDN/COL4A6/COL12A1/COL9A3/SPOCK2/ADAMTS1/CAV2/TIMP…	95
	BP	GO:0001655	urogenital system development	78/1994	330/18866	5.1196e-12	8.84872e-09	7.46384e-09	KIF26B/ALDH1A2/PGF/ASS1/AGT/LGR5/GATA3/OVOL1/BMP2/PAX8/NKX3-1/PKHD1/NOTCH3/FRAS1/PDGFD/TFAP2A/TMED10/BDNF/PCSK5/SMAD4/GDF11/TGFB2/IFT88/CDKN1B/VEGFA/FOXA1/NPNT/PODXL/PROX1/EPHB3/PBX1/SIX4/RPGRIP1L/KANK2/WNT7B/CRIP1/TBX18/TGFBR1/RDH10/FSTL3/CFLAR/WNK4/CPLANE1/PDGFB/DLG5/CTSH/WNT4/COL4A4/KLF15/PKD2/SMAD7/ACVR2B/ADAMTS1/BMP4/HYAL2/MAGI2/CYP26B1/TP73/EPHA4/KLHL3/GLIS2/EAF2/PLCE1/SOX4/BCL2L11/TNC/COL4…	78
	BP	GO:0072001	renal system development	71/1994	292/18866	1.14127e-11	1.6438e-08	1.38654e-08	KIF26B/ALDH1A2/PGF/ASS1/AGT/LGR5/GATA3/OVOL1/BMP2/PAX8/NKX3-1/PKHD1/NOTCH3/FRAS1/PDGFD/TFAP2A/TMED10/BDNF/PCSK5/SMAD4/GDF11/TGFB2/IFT88/VEGFA/NPNT/PODXL/PROX1/PBX1/SIX4/RPGRIP1L/KANK2/WNT7B/TBX18/TGFBR1/RDH10/FSTL3/CFLAR/WNK4/CPLANE1/PDGFB/DLG5/CTSH/WNT4/COL4A4/KLF15/PKD2/SMAD7/ACVR2B/ADAMTS1/BMP4/HYAL2/MAGI2/CYP26B1/TP73/EPHA4/KLHL3/GLIS2/PLCE1/SOX4/BCL2L11/COL4A3/STRA6/NOTCH1/ACE/ARID5B/LAMA5/G…	71
	BP	GO:0001822	kidney development	69/1994	283/18866	1.94689e-11	2.40357e-08	2.0274e-08	KIF26B/ALDH1A2/PGF/ASS1/AGT/GATA3/OVOL1/BMP2/PAX8/NKX3-1/PKHD1/NOTCH3/FRAS1/PDGFD/TFAP2A/TMED10/BDNF/PCSK5/SMAD4/GDF11/TGFB2/IFT88/VEGFA/NPNT/PODXL/PROX1/PBX1/SIX4/RPGRIP1L/KANK2/WNT7B/TGFBR1/RDH10/FSTL3/CFLAR/WNK4/CPLANE1/PDGFB/DLG5/CTSH/WNT4/COL4A4/KLF15/PKD2/SMAD7/ACVR2B/ADAMTS1/BMP4/HYAL2/MAGI2/CYP26B1/TP73/EPHA4/KLHL3/GLIS2/PLCE1/SOX4/BCL2L11/COL4A3/STRA6/NOTCH1/ACE/ARID5B/LAMA5/GLI2/CRLF1/F…	69
	BP	GO:0052696	flavonoid glucuronidation	9/1994	9/18866	1.61951e-09	1.74948e-06	1.47568e-06	UGT1A10/UGT1A7/UGT1A9/UGT1A5/UGT1A3/UGT1A4/UGT1A6/UGT1A8/UGT1A1	9
	BP	GO:0046394	carboxylic acid biosynthetic process	75/1994	367/18866	1.43304e-08	1.37603e-05	1.16068e-05	ALDH1A2/ASS1/ACSM3/TRIB3/MGLL/CBS/CSPG4/PHGDH/ASNS/SLC27A2/ALDH1A3/ATP2B4/SHMT2/EDN1/PYCR1/CTH/FA2H/VCAN/DSEL/PSPH/UST/CYP2E1/NR1H3/SCD/NR1D1/PROX1/PSAT1/GOT1/CD74/FADS3/GLUL/SCD5/FADS1/FABP5/AKR1C4/GGT7/SLC45A3/ACSS1/RDH10/TBXAS1/MYO5A/GLUD2/LIPH/RIMKLA/PDGFB/ACOT7/AKR1C3/ASAH2/PLA2G4A/ABAT/ASL/APIP/CYP4F11/PTGES/HYAL1/PTGS1/CPS1/ELOVL6/PRKAA2/GPT2/SIRT1/SMPD3/ALOX5/ELOVL7/MLXIPL/BCAN/PER2/EPHX2…	75
	BP	GO:0016053	organic acid biosynthetic process	75/1994	368/18866	1.61747e-08	1.39782e-05	1.17905e-05	ALDH1A2/ASS1/ACSM3/TRIB3/MGLL/CBS/CSPG4/PHGDH/ASNS/SLC27A2/ALDH1A3/ATP2B4/SHMT2/EDN1/PYCR1/CTH/FA2H/VCAN/DSEL/PSPH/UST/CYP2E1/NR1H3/SCD/NR1D1/PROX1/PSAT1/GOT1/CD74/FADS3/GLUL/SCD5/FADS1/FABP5/AKR1C4/GGT7/SLC45A3/ACSS1/RDH10/TBXAS1/MYO5A/GLUD2/LIPH/RIMKLA/PDGFB/ACOT7/AKR1C3/ASAH2/PLA2G4A/ABAT/ASL/APIP/CYP4F11/PTGES/HYAL1/PTGS1/CPS1/ELOVL6/PRKAA2/GPT2/SIRT1/SMPD3/ALOX5/ELOVL7/MLXIPL/BCAN/PER2/EPHX2…	75
	BP	GO:0001667	ameboidal-type cell migration	91/1994	481/18866	2.2485e-08	1.7665e-05	1.49003e-05	AGT/S100P/GATA3/PRR5L/PLCG2/DNAJA4/FGF18/VIL1/PPARG/HMOX1/HDAC5/ATP2B4/HIF1A/FOLR1/SEMA4B/PAK1/FN1/EDN1/WNT7A/SRPX2/ITGB7/MAPRE2/PTPRM/ANXA3/ADAMTS9/S100A2/EMP2/THBS1/TGFB2/KLF4/VEGFA/PLK2/NR2F2/PROX1/ARHGDIB/EPHA2/SP1/ADAM9/SEMA3F/EPB41L4B/GLUL/ARHGAP4/KANK2/EMC10/INSL3/SEMA3A/TGFBR1/DAB2IP/SEMA4A/MAP4K4/ANXA6/SEMA4G/STC1/PDGFB/AMOT/ROBO1/CTSH/EFNA1/FERMT1/EVL/TIMP1/SEMA3B/BMP4/HYAL2/RGCC/HYAL1/…	91
	BP	GO:0007409	axonogenesis	90/1994	482/18866	5.07075e-08	3.41309e-05	2.87892e-05	UNC5A/PAX6/GATA3/WNT3/TSKU/GRB10/TUBB3/NRCAM/NOTCH3/EFNA5/LRP1/MATN2/SEMA4B/EPHB6/PAK1/FN1/BAIAP2/WNT7A/PTPRM/KLF7/BDNF/SMAD4/MAPT/SZT2/CELSR3/UST/VEGFA/SKIL/EZR/PLXNA2/PTPRS/EPHB3/EPHA2/RAP1GAP/SEMA3F/SLITRK6/XK/ARHGAP4/NTRK2/PLXNB3/DOK4/SPTB/NLGN3/MAP2K1/SEMA3A/BMPR1B/SEMA4A/TWF2/KIAA0319/PALLD/SEMA4G/PLXNB2/DOCK7/NTN4/KIF13B/ROBO1/SCN1B/KIF3A/EFNA1/RAB3A/EVL/FZD3/FYN/MAP1B/SEMA3B/ATL1/DBN1/SEM…	90
	BP	GO:0050808	synapse organization	83/1994	433/18866	5.13425e-08	3.41309e-05	2.87892e-05	GNPAT/SYNPO/GLRB/ARHGAP44/NRCAM/DNM3/SLC7A11/AMIGO2/EFNA5/BAIAP2/WNT7A/SRPX2/BDNF/MAPT/C3/ABHD17C/PCDHB14/LRP8/FNTA/IGF1R/COL4A5/PTPRS/EPHB3/PCDHGC3/CLSTN3/SEMA3F/VSTM5/CHCHD10/SLITRK6/SIX4/AGRN/GPC4/NTRK2/KALRN/NDRG1/WNT7B/NLGN3/CAPRIN2/DKK1/DAB2IP/NFATC4/DOK7/SEMA4A/MYO5A/PCDHGC5/EGLN1/PLXNB2/PCDHGC4/DLG5/EFNA1/RAB3A/WASF3/FYN/MAP1B/SPOCK2/DBN1/ACTN1/MAGI2/PCDHB2/PPFIBP2/SYNGAP1/OBSL1/EPHA4/NRP…	83
	BP	GO:0052697	xenobiotic glucuronidation	9/1994	11/18866	7.3003e-08	4.50637e-05	3.8011e-05	UGT1A10/UGT1A7/UGT1A9/UGT1A5/UGT1A3/UGT1A4/UGT1A6/UGT1A8/UGT1A1	9
	BP	GO:0061448	connective tissue development	56/1994	262/18866	2.03862e-07	0.000117451	9.90695e-05	HOXB3/FGF18/CCN1/CSF1/BMP2/HIF1A/PDGFD/TGFBI/EFEMP1/EDN1/WNT7A/COL11A2/KLF7/HMGA2/CCN2/FOXA1/BMP1/FGFR3/AACS/RUNX2/ECM1/WNT7B/CRIP1/POC1A/TGFBR1/RORC/BMPR1B/CFLAR/HYAL3/ANXA6/STC1/PDGFB/SOX6/DGAT2/SATB2/LTBP3/SMAD7/PITX1/TIMP1/BMP8B/BMP4/HYAL2/HYAL1/AXIN2/COL27A1/SIRT1/SMPD3/NOTCH1/BMP8A/ARID5B/CCN3/GLI2/ADAMTS7/SCIN/ITGB8/RARB	56
	BP	GO:0022604	regulation of cell morphogenesis	90/1994	499/18866	2.57751e-07	0.000139218	0.000117429	WNT3/VIL1/PARVB/FAM171A1/ARHGAP44/NRCAM/DNM3/EFNA5/CLDN4/LRP1/SEMA4B/PAK1/FN1/BAIAP2/WNT7A/FGD3/BDNF/FBLIM1/MAPT/UST/VEGFA/LRP8/SKIL/RHOBTB1/SYT1/EZR/PLXNA2/PTPRS/MELTF/EPHB3/ANKRD27/SEMA3F/XK/DAPK3/ARHGAP4/NTRK2/KALRN/PLXNB3/NLGN3/MAP2K1/SEMA3A/ARHGEF18/CAPRIN2/FBXW8/NFATC4/SEMA4A/TWF2/SMURF1/KIAA0319/SYT17/SEMA4G/PLXNB2/KIF13B/SHROOM3/ROBO1/MSN/DLC1/EFNA1/WASF3/FYN/NSMF/MAP1B/CDC42EP5/SEMA3B/DB…	90
	BP	GO:0089718	amino acid import across plasma membrane	17/1994	41/18866	3.01832e-07	0.000153437	0.000129423	AGT/NTSR1/ACE2/SLC7A11/SLC3A2/SLC43A1/SLC1A4/SLC6A9/SLC1A1/SLC1A5/SLC43A2/SLC7A1/SLC47A1/ITGB1/SLC7A5/PER2/RGS2	17
	BP	GO:0002064	epithelial cell development	49/1994	221/18866	3.67282e-07	0.000176336	0.000148738	PAX6/ONECUT2/ATF4/HIF1A/ARHGEF26/WNT7A/SLC4A5/HEG1/VEGFA/GRHL2/FOXA1/PODXL/EZR/PROX1/PTPRS/EPHA2/SLITRK6/COL18A1/MYO7A/WNT7B/ENG/SPDEF/CDK6/PDZD7/FLNB/PRDM1/PALLD/STC1/PDGFB/SHROOM3/MSN/RAPGEF3/BMP4/MAGI2/FAT1/CLDN3/EXPH5/SLC4A7/ICAM1/IL6ST/PDE4D/NOTCH1/FLNA/VIM/ADAMTSL4/DNASE1L2/PROC/RARB/DLL1	49
	BP	GO:0042326	negative regulation of phosphorylation	87/1994	484/18866	4.72885e-07	0.000215088	0.000181426	AGT/DBNDD2/PAX6/TIMP3/TRIB3/PSCA/PRR5L/PPP1R1B/MECOM/SOCS3/RASIP1/CYLD/NDRG2/PINK1/SMAD4/QARS1/PTPRB/MAPT/SIRPA/DUSP1/KLF4/HEG1/OCLN/CDKN1B/DEPTOR/UBASH3B/SMPD1/EZR/NCK1/NR2F2/TFAP4/IGF1R/HEXIM1/XDH/CADM4/DNAJC15/IGFBP3/ATF3/PKIB/NF2/CBLB/CTDSP2/SPINK1/RPS6KA6/NIBAN1/BTN2A2/PAQR3/DKK1/ENG/ARRB2/DAB2IP/TNFAIP3/DMD/TRIB1/EMILIN1/EFNA1/GPD1L/PRKAR2B/MIDN/SMAD7/WNK2/BMP4/HYAL2/AJUBA/DUSP5/GADD45A/DUS…	87
	BP	GO:0010769	regulation of cell morphogenesis involved in differentiation	62/1994	310/18866	5.52013e-07	0.000233458	0.00019692	WNT3/ARHGAP44/NRCAM/DNM3/EFNA5/LRP1/SEMA4B/PAK1/FN1/BAIAP2/WNT7A/BDNF/MAPT/UST/VEGFA/LRP8/SKIL/PLXNA2/PTPRS/MELTF/EPHB3/ANKRD27/SEMA3F/XK/ARHGAP4/NTRK2/KALRN/PLXNB3/NLGN3/MAP2K1/SEMA3A/CAPRIN2/FBXW8/NFATC4/SEMA4A/TWF2/KIAA0319/SEMA4G/PLXNB2/KIF13B/ROBO1/EFNA1/NSMF/MAP1B/SEMA3B/DBN1/VAMP7/SEMA4C/SYNGAP1/OBSL1/EPHA4/MACF1/NGEF/SEMA7A/SEMA4F/KNDC1/CSPG5/FLNA/L1CAM/TRIM46/RND2/CHRNA3	62
	BP	GO:0050770	regulation of axonogenesis	43/1994	186/18866	5.67301e-07	0.000233458	0.00019692	WNT3/NRCAM/EFNA5/LRP1/SEMA4B/PAK1/FN1/WNT7A/BDNF/MAPT/UST/VEGFA/SKIL/PLXNA2/PTPRS/EPHB3/SEMA3F/XK/ARHGAP4/NTRK2/PLXNB3/MAP2K1/SEMA3A/SEMA4A/TWF2/KIAA0319/SEMA4G/PLXNB2/KIF13B/ROBO1/EFNA1/MAP1B/SEMA3B/DBN1/SEMA4C/SYNGAP1/EPHA4/MACF1/SEMA7A/SEMA4F/L1CAM/TRIM46/RND2	43
	BP	GO:0007411	axon guidance	58/1994	284/18866	6.21162e-07	0.000237416	0.000200259	UNC5A/PAX6/GATA3/WNT3/GRB10/TUBB3/NRCAM/NOTCH3/EFNA5/LRP1/MATN2/SEMA4B/EPHB6/PTPRM/KLF7/BDNF/SMAD4/CELSR3/VEGFA/EZR/PLXNA2/EPHB3/EPHA2/RAP1GAP/SEMA3F/PLXNB3/DOK4/SPTB/SEMA3A/BMPR1B/SEMA4A/PALLD/SEMA4G/PLXNB2/NTN4/ROBO1/SCN1B/KIF3A/EFNA1/EVL/FZD3/FYN/SEMA3B/SEMA4C/EPHA4/NRP2/OPHN1/PRKCA/ISL1/SEMA7A/SEMA4F/LAMA2/NOTCH1/EGR2/LAMA5/GLI2/VSTM2L/L1CAM	58
	BP	GO:0001933	negative regulation of protein phosphorylation	81/1994	444/18866	6.31865e-07	0.000237416	0.000200259	AGT/DBNDD2/PAX6/TIMP3/TRIB3/PSCA/PRR5L/PPP1R1B/MECOM/SOCS3/RASIP1/CYLD/NDRG2/PINK1/SMAD4/QARS1/PTPRB/SIRPA/DUSP1/KLF4/HEG1/OCLN/CDKN1B/DEPTOR/UBASH3B/SMPD1/EZR/NCK1/NR2F2/TFAP4/IGF1R/HEXIM1/XDH/CADM4/IGFBP3/ATF3/PKIB/NF2/CBLB/CTDSP2/SPINK1/RPS6KA6/NIBAN1/BTN2A2/PAQR3/DKK1/ENG/ARRB2/DAB2IP/TNFAIP3/DMD/TRIB1/EMILIN1/EFNA1/GPD1L/PRKAR2B/SMAD7/WNK2/BMP4/HYAL2/DUSP5/GADD45A/DUSP16/MAPK8IP1/CDKN2C/PTPR…	81
	BP	GO:0097485	neuron projection guidance	58/1994	285/18866	7.01016e-07	0.000251013	0.000211728	UNC5A/PAX6/GATA3/WNT3/GRB10/TUBB3/NRCAM/NOTCH3/EFNA5/LRP1/MATN2/SEMA4B/EPHB6/PTPRM/KLF7/BDNF/SMAD4/CELSR3/VEGFA/EZR/PLXNA2/EPHB3/EPHA2/RAP1GAP/SEMA3F/PLXNB3/DOK4/SPTB/SEMA3A/BMPR1B/SEMA4A/PALLD/SEMA4G/PLXNB2/NTN4/ROBO1/SCN1B/KIF3A/EFNA1/EVL/FZD3/FYN/SEMA3B/SEMA4C/EPHA4/NRP2/OPHN1/PRKCA/ISL1/SEMA7A/SEMA4F/LAMA2/NOTCH1/EGR2/LAMA5/GLI2/VSTM2L/L1CAM	58
	BP	GO:1902475	L-alpha-amino acid transmembrane transport	21/1994	62/18866	7.28611e-07	0.000251013	0.000211728	AGT/NTSR1/ACE2/SLC7A11/SLC3A2/SLC43A1/SLC1A4/SLC6A9/PRAF2/SLC1A1/SLC1A5/SLC25A22/SLC43A2/SLC7A1/SLC38A1/SLC47A1/SLC25A29/ITGB1/SLC7A5/PER2/RGS2	21
	BP	GO:0090132	epithelium migration	70/1994	368/18866	7.56572e-07	0.000251013	0.000211728	AGT/S100P/GATA3/PLCG2/DNAJA4/FGF18/VIL1/PPARG/HMOX1/HDAC5/ATP2B4/HIF1A/EDN1/WNT7A/SRPX2/MAPRE2/PTPRM/ANXA3/ADAMTS9/S100A2/EMP2/THBS1/TGFB2/KLF4/VEGFA/GRHL2/PLK2/NR2F2/PROX1/EPHA2/SP1/ADAM9/EPB41L4B/GLUL/KANK2/EMC10/INSL3/SEMA3A/TGFBR1/DAB2IP/SEMA4A/MAP4K4/STC1/PDGFB/AMOT/ROBO1/CTSH/EFNA1/FERMT1/EVL/BMP4/RGCC/HYAL1/BCAR1/ITGB1/JCAD/GLIPR2/GADD45A/NRP2/MACF1/PRKCA/ETS1/SIRT1/FUT1/NOTCH1/DUSP10/PTPR…	70
	BP	GO:0072330	monocarboxylic acid biosynthetic process	52/1994	246/18866	7.84234e-07	0.000251013	0.000211728	ALDH1A2/ACSM3/TRIB3/MGLL/CSPG4/ASNS/SLC27A2/ALDH1A3/EDN1/FA2H/VCAN/DSEL/UST/CYP2E1/NR1H3/SCD/NR1D1/PROX1/CD74/FADS3/SCD5/FADS1/FABP5/AKR1C4/SLC45A3/ACSS1/RDH10/TBXAS1/MYO5A/LIPH/ACOT7/AKR1C3/ASAH2/PLA2G4A/ABAT/CYP4F11/PTGES/PTGS1/ELOVL6/PRKAA2/SIRT1/ALOX5/ELOVL7/MLXIPL/BCAN/PER2/EPHX2/PLA2G4F/FADS2/CSPG5/DHRS9/GSTM1	52
	BP	GO:0009914	hormone transport	63/1994	323/18866	1.10728e-06	0.000329286	0.000277751	AGT/GATA3/CACNA1D/PTPRN2/HIF1A/PAX8/NKX3-1/BAIAP3/EFNA5/LRP1/EDN1/KLF7/SMAD4/ICA1/NMB/ADORA1/INHBB/ADCY5/NR1D1/CPT1A/ILDR1/RAB8B/CAMK2G/SLC9B2/GLUL/PDX1/KALRN/AACS/RAB11FIP3/TCF7L2/MYO5A/MYB/HNF1A/ITPR2/PHPT1/HLA-DRB1/RAPGEF3/MIDN/ABAT/ACVR2B/STXBP4/ITPR1/VAMP7/SLCO4A1/SLC7A5/STX1A/PRKCA/GPER1/ISL1/PFKFB2/SOX4/SMPD3/ALOX5/SIRT4/PER2/INHA/TBX3/ACVR1C/BMP8A/SYT7/CCN3/CACNA2D2/NPPA	63
	BP	GO:0051271	negative regulation of cellular component movement	74/1994	400/18866	1.11199e-06	0.000329286	0.000277751	GATA3/WNT3/DNAJA4/PPARG/HMOX1/CCL28/HDAC5/ATP2B4/PKHD1/RAP2B/LRP1/SEMA4B/IL27RA/PTPRM/CNIH2/PTGER4/BIN1/ADAMTS9/IFITM1/THBS1/DUSP1/KLF4/CDKN1B/ADORA1/NR2F2/ARHGDIB/ADAM15/IGFBP3/MITF/CD74/NF2/SEMA3F/ARHGAP4/PLXNB3/SEMA3A/ENG/DAB2IP/SEMA4A/TRIB1/SEMA4G/EMILIN1/PHLDB2/MAPK15/STC1/ADGRG1/ROBO1/DLG5/DLC1/GCSAM/NDRG4/WNT4/EVL/SMAD7/TIMP1/SEMA3B/HYAL2/ACTN1/RGCC/MAGI2/SEMA4C/CLDN3/GADD45A/MIR93/ARPIN/P…	74
	BP	GO:0010631	epithelial cell migration	69/1994	365/18866	1.14309e-06	0.000329286	0.000277751	AGT/S100P/GATA3/PLCG2/DNAJA4/FGF18/VIL1/PPARG/HMOX1/HDAC5/ATP2B4/HIF1A/EDN1/WNT7A/SRPX2/MAPRE2/PTPRM/ANXA3/ADAMTS9/S100A2/EMP2/THBS1/TGFB2/KLF4/VEGFA/PLK2/NR2F2/PROX1/EPHA2/SP1/ADAM9/EPB41L4B/GLUL/KANK2/EMC10/INSL3/SEMA3A/TGFBR1/DAB2IP/SEMA4A/MAP4K4/STC1/PDGFB/AMOT/ROBO1/CTSH/EFNA1/FERMT1/EVL/BMP4/RGCC/HYAL1/BCAR1/ITGB1/JCAD/GLIPR2/GADD45A/NRP2/MACF1/PRKCA/ETS1/SIRT1/FUT1/NOTCH1/DUSP10/PTPRG/CCN3…	69
	BP	GO:0031589	cell-substrate adhesion	68/1994	359/18866	1.26764e-06	0.000343543	0.000289776	MUC4/GAS6/ONECUT2/PARVB/CCN1/CCL28/CSF1/LAMB1/EFNA5/LRP1/FBLN5/FN1/ITGB7/ADAMTS9/TMEM8B/EMP2/THBS1/CCN2/VEGFA/ITGA10/NPNT/ITGA5/LYPD3/ADAM15/ITGB6/MELTF/EPHB3/ADAM9/NF2/ITGA1/EPDR1/DAPK3/BCAM/MEGF9/CDK6/MAP4K4/EMILIN1/PHLDB2/NTN4/DLC1/EFNA1/WNT4/FERMT1/SPOCK2/AXL/ACTN1/AJUBA/ITGB1/PLEKHA2/MACF1/JAM3/LGALS1/PTPRJ/ACER2/CAMSAP3/BCL2L11/FUT1/NOTCH1/CSPG5/LAMB3/FLNA/LAMA5/ANTXR1/NID2/ITGB2/L1CAM/UTRN…	68
	BP	GO:0007160	cell-matrix adhesion	49/1994	230/18866	1.27209e-06	0.000343543	0.000289776	MUC4/ONECUT2/CCL28/CSF1/EFNA5/LRP1/FBLN5/FN1/ITGB7/ADAMTS9/TMEM8B/EMP2/THBS1/CCN2/VEGFA/ITGA10/NPNT/LYPD3/ADAM15/ITGB6/ADAM9/NF2/ITGA1/EPDR1/DAPK3/BCAM/CDK6/MAP4K4/EMILIN1/PHLDB2/DLC1/WNT4/FERMT1/ACTN1/AJUBA/ITGB1/PLEKHA2/MACF1/JAM3/PTPRJ/ACER2/CAMSAP3/BCL2L11/FUT1/NID2/ITGB2/L1CAM/UTRN/PLAU	49
	BP	GO:0090130	tissue migration	70/1994	374/18866	1.39552e-06	0.000365457	0.000308261	AGT/S100P/GATA3/PLCG2/DNAJA4/FGF18/VIL1/PPARG/HMOX1/HDAC5/ATP2B4/HIF1A/EDN1/WNT7A/SRPX2/MAPRE2/PTPRM/ANXA3/ADAMTS9/S100A2/EMP2/THBS1/TGFB2/KLF4/VEGFA/GRHL2/PLK2/NR2F2/PROX1/EPHA2/SP1/ADAM9/EPB41L4B/GLUL/KANK2/EMC10/INSL3/SEMA3A/TGFBR1/DAB2IP/SEMA4A/MAP4K4/STC1/PDGFB/AMOT/ROBO1/CTSH/EFNA1/FERMT1/EVL/BMP4/RGCC/HYAL1/BCAR1/ITGB1/JCAD/GLIPR2/GADD45A/NRP2/MACF1/PRKCA/ETS1/SIRT1/FUT1/NOTCH1/DUSP10/PTPR…	70
	BP	GO:0043090	amino acid import	17/1994	45/18866	1.45262e-06	0.000369222	0.000311437	AGT/NTSR1/ACE2/SLC7A11/SLC3A2/SLC43A1/SLC1A4/SLC6A9/SLC1A1/SLC1A5/SLC43A2/SLC7A1/SLC47A1/ITGB1/SLC7A5/PER2/RGS2	17
	BP	GO:0034329	cell junction assembly	78/1994	434/18866	1.84449e-06	0.000448945	0.000378682	AGT/GJB1/GNPAT/NRCAM/ACE2/DNM3/GJC1/AMIGO2/EFNA5/CLDN4/LRP1/ESAM/FN1/WNT7A/SRPX2/BDNF/CLDN2/FBLIM1/THBS1/HEG1/OCLN/PCDHB14/VEGFA/GRHL2/ITGA5/PTPRS/EPHB3/TLN1/EPHA2/CLSTN3/VSTM5/DST/SLITRK6/SIX4/DAPK3/AGRN/GPC4/NTRK2/CDH24/PIP5K1C/NLGN3/DKK1/SEMA4A/MAP4K4/TLN2/PHLDB2/PLXNB2/DLG5/DLC1/CLDN7/WNT4/SMAD7/MAP1B/SPOCK2/ACTN1/MAGI2/PCDHB2/AJUBA/CLDN3/OBSL1/MACF1/OPHN1/GABRB3/PRKCA/JAM3/PLEC/PTPRJ/CAMSAP3…	78
	BP	GO:0046879	hormone secretion	61/1994	314/18866	1.87017e-06	0.000448945	0.000378682	AGT/GATA3/CACNA1D/PTPRN2/HIF1A/PAX8/NKX3-1/BAIAP3/EFNA5/LRP1/EDN1/KLF7/SMAD4/ICA1/NMB/ADORA1/INHBB/ADCY5/NR1D1/CPT1A/ILDR1/RAB8B/CAMK2G/SLC9B2/GLUL/PDX1/KALRN/AACS/RAB11FIP3/TCF7L2/MYO5A/MYB/HNF1A/ITPR2/PHPT1/HLA-DRB1/RAPGEF3/MIDN/ABAT/ACVR2B/STXBP4/ITPR1/VAMP7/STX1A/PRKCA/GPER1/ISL1/PFKFB2/SOX4/SMPD3/ALOX5/SIRT4/PER2/INHA/TBX3/ACVR1C/BMP8A/SYT7/CCN3/CACNA2D2/NPPA	61
	BP	GO:0010632	regulation of epithelial cell migration	59/1994	301/18866	2.03504e-06	0.00047532	0.000400929	AGT/GATA3/PLCG2/DNAJA4/FGF18/VIL1/PPARG/HMOX1/HDAC5/ATP2B4/HIF1A/EDN1/WNT7A/SRPX2/MAPRE2/PTPRM/ANXA3/ADAMTS9/EMP2/THBS1/TGFB2/KLF4/VEGFA/PLK2/NR2F2/PROX1/EPHA2/SP1/ADAM9/EPB41L4B/GLUL/EMC10/INSL3/SEMA3A/DAB2IP/SEMA4A/MAP4K4/STC1/PDGFB/CTSH/EFNA1/EVL/BMP4/RGCC/HYAL1/BCAR1/JCAD/GLIPR2/GADD45A/NRP2/MACF1/PRKCA/ETS1/SIRT1/FUT1/NOTCH1/DUSP10/PTPRG/MCC	59
	BP	GO:0048880	sensory system development	72/1994	394/18866	2.45638e-06	0.000558633	0.000471204	ALDH1A2/PAX6/GATA3/MYOM1/TSKU/ATF4/ALDH1A3/SLC7A11/ATP2B4/HIF1A/TFAP2A/EFEMP1/WNT7A/SLC4A5/PTPRM/BDNF/TTLL5/C3/GDF11/TGFB2/KLF4/CDKN1B/VEGFA/TDRD7/GRHL2/SKIL/USH1C/PROX1/PBX1/EPHA2/MITF/BCAR3/NF2/MEIS2/SHROOM2/SLITRK6/MYO7A/RPGRIP1L/NTRK2/MEIS1/MYOM2/WNT7B/SEMA3A/CDON/TGFBR1/RDH10/BMPR1B/TUB/PRDM1/RAB18/IFT172/HIPK2/SKI/ACVR2B/BMP4/BBS7/FAT1/OBSL1/HSF4/GPD2/ISL1/NHS/FSCN2/STRA6/SMOC1/ACHE/VIM/COL…	72
	BP	GO:0051216	cartilage development	43/1994	197/18866	2.87332e-06	0.000636698	0.000537051	HOXB3/FGF18/CCN1/BMP2/HIF1A/TGFBI/EFEMP1/EDN1/WNT7A/COL11A2/HMGA2/CCN2/BMP1/FGFR3/RUNX2/ECM1/WNT7B/POC1A/TGFBR1/BMPR1B/HYAL3/ANXA6/STC1/SOX6/SATB2/LTBP3/SMAD7/PITX1/TIMP1/BMP8B/BMP4/HYAL2/HYAL1/AXIN2/COL27A1/SMPD3/BMP8A/CCN3/GLI2/ADAMTS7/SCIN/ITGB8/RARB	43
	BP	GO:0001503	ossification	74/1994	412/18866	3.44352e-06	0.000743973	0.000627537	WNT3/SNX10/FGF18/ADRB2/CCN1/ATF4/CSF1/BMP2/HIF1A/TFAP2A/TPM4/COL6A1/PTGER4/IFITM1/VCAN/CCN2/TGFB2/SIRT7/NPNT/TMEM64/BMP1/PBX1/EPHA2/IGFBP3/NAB1/ALYREF/TOB1/FGFR3/BMP2K/CEBPB/FAM20C/RUNX2/ECM1/WNT7B/KAZALD1/DKK1/BMPR1B/CDK6/FSTL3/SMURF1/ADGRV1/TGFB3/STC1/TNFRSF11A/PPARGC1B/WNT4/SKI/SATB2/LTBP3/SMAD7/ACVR2B/FBL/BMP8B/BMP4/AXIN2/IGSF10/SEMA7A/HDAC4/SMPD3/IL6ST/PHEX/ALOX5/TNC/SMOC1/CREB3L1/NOTCH1/ACH…	74
	BP	GO:1901342	regulation of vasculature development	78/1994	444/18866	4.47349e-06	0.000926883	0.00078182	PGF/NFATC1/AGT/ADM2/HSPG2/FGF18/PPARG/HMOX1/CXCL8/HDAC5/ATP2B4/HIF1A/PDGFD/FBLN5/SRPX2/CTH/PTPRM/VEGFB/ANXA3/ADAMTS9/HMGA2/C3/EMP2/THBS1/TGFB2/KLF4/VEGFA/DDAH1/PLK2/ITGA5/XDH/EPHA2/SP1/LRG1/GLUL/EMC10/ECM1/ENG/DAB2IP/SEMA4A/TNFAIP3/CFLAR/HTATIP2/EMILIN1/EGLN1/PDGFB/AMOT/PDE3B/CTSH/EFNA1/WNT4/HIPK2/RAPGEF3/ADAMTS1/BMP4/RGCC/HYAL1/S100A1/ITGB1/JCAD/GADD45A/CEMIP2/PRKCA/GPER1/ISL1/ETS1/SIRT1/FUT1/AL…	78
	BP	GO:0046883	regulation of hormone secretion	53/1994	267/18866	4.50464e-06	0.000926883	0.00078182	AGT/CACNA1D/HIF1A/PAX8/NKX3-1/BAIAP3/EFNA5/LRP1/EDN1/KLF7/SMAD4/ICA1/NMB/ADORA1/INHBB/ADCY5/NR1D1/CPT1A/ILDR1/RAB8B/SLC9B2/GLUL/PDX1/KALRN/AACS/RAB11FIP3/TCF7L2/MYB/ITPR2/PHPT1/HLA-DRB1/RAPGEF3/MIDN/ABAT/STXBP4/ITPR1/VAMP7/STX1A/PRKCA/GPER1/ISL1/PFKFB2/SOX4/ALOX5/SIRT4/PER2/INHA/ACVR1C/BMP8A/SYT7/CCN3/CACNA2D2/NPPA	53
	BP	GO:0060537	muscle tissue development	73/1994	409/18866	5.04391e-06	0.00100559	0.000848212	ALDH1A2/AGT/MYOM1/BMP2/GJC1/PIM1/PAK1/EDN1/YBX3/TLL2/MAPK11/SMAD4/ADAMTS9/FHOD3/TGFB2/HEG1/VEGFA/MYH11/NR2F2/PROX1/ERBB3/MYLK/ATF3/MYORG/ZFPM1/SIX4/XK/SGCB/MEIS1/MYOM2/CDON/DKK1/ENG/TGFBR1/ARRB2/MTM1/ZBTB18/SRPK3/CFLAR/FLNB/IGSF8/EGLN1/SOX6/NDRG4/ALPK3/SKI/PKD2/SMAD7/PITX1/CAV2/BMP4/BCL9L/CYP26B1/TP73/ITGB1/OBSL1/SIK1/ISL1/SAP30/HDAC4/TCAP/TBX3/STRA6/NOTCH1/EGR2/TNNT2/RGS2/AKAP6/RARB/MIR25/TNNC1/…	73
	BP	GO:0003279	cardiac septum development	29/1994	114/18866	5.2617e-06	0.00100559	0.000848212	GATA3/CCN1/PAX8/PCSK5/SMAD4/TGFB2/HEG1/PROX1/DNAH11/LUZP1/ZFPM1/NDST1/ENG/TGFBR1/PRDM1/EGLN1/CPLANE1/ROBO1/SMAD7/BMP4/NRP2/FZD2/ISL1/SOX4/TBX3/SALL4/STRA6/NOTCH1/RARB	29
	BP	GO:0085029	extracellular matrix assembly	16/1994	44/18866	5.28816e-06	0.00100559	0.000848212	AGT/GAS6/LAMB1/FBLN5/THSD4/MYH11/EMILIN1/PHLDB2/NTN4/LTBP3/PXDN/RGCC/SMPD3/NOTCH1/LAMB3/ANTXR1	16
	BP	GO:0150063	visual system development	70/1994	388/18866	5.35261e-06	0.00100559	0.000848212	ALDH1A2/PAX6/GATA3/MYOM1/TSKU/ATF4/ALDH1A3/SLC7A11/ATP2B4/HIF1A/TFAP2A/EFEMP1/WNT7A/SLC4A5/PTPRM/BDNF/TTLL5/C3/GDF11/TGFB2/KLF4/CDKN1B/VEGFA/TDRD7/GRHL2/SKIL/USH1C/PROX1/PBX1/EPHA2/MITF/BCAR3/NF2/MEIS2/SHROOM2/SLITRK6/MYO7A/RPGRIP1L/NTRK2/MEIS1/MYOM2/WNT7B/CDON/TGFBR1/RDH10/BMPR1B/TUB/PRDM1/RAB18/IFT172/HIPK2/SKI/ACVR2B/BMP4/BBS7/FAT1/OBSL1/HSF4/GPD2/NHS/FSCN2/STRA6/SMOC1/ACHE/VIM/COL5A2/FBN1/RAR…	70
	BP	GO:0006636	unsaturated fatty acid biosynthetic process	19/1994	59/18866	5.71504e-06	0.00104886	0.000884709	EDN1/SCD/CD74/FADS3/SCD5/FADS1/FABP5/TBXAS1/AKR1C3/PLA2G4A/PTGES/PTGS1/ELOVL6/SIRT1/ALOX5/ELOVL7/PLA2G4F/FADS2/GSTM1	19
	BP	GO:0014706	striated muscle tissue development	70/1994	389/18866	5.86664e-06	0.00104886	0.000884709	ALDH1A2/AGT/MYOM1/BMP2/GJC1/PIM1/PAK1/EDN1/YBX3/TLL2/MAPK11/SMAD4/ADAMTS9/FHOD3/TGFB2/HEG1/VEGFA/MYH11/NR2F2/PROX1/ERBB3/ATF3/MYORG/ZFPM1/SIX4/XK/SGCB/MEIS1/MYOM2/CDON/DKK1/ENG/TGFBR1/ARRB2/MTM1/ZBTB18/SRPK3/CFLAR/FLNB/IGSF8/EGLN1/SOX6/NDRG4/ALPK3/SKI/SMAD7/PITX1/CAV2/BMP4/BCL9L/CYP26B1/TP73/ITGB1/OBSL1/SIK1/ISL1/SAP30/HDAC4/TCAP/TBX3/NOTCH1/EGR2/TNNT2/RGS2/AKAP6/RARB/MIR25/TNNC1/DLL1/NPPA	70
	BP	GO:1903034	regulation of response to wounding	40/1994	183/18866	6.06583e-06	0.00104886	0.000884709	PLAT/VIL1/CLDN4/LRP1/EDN1/DUOX2/THBS1/KLF4/OCLN/UBASH3B/THBD/CADM4/DUOX1/PTPRS/MYLK/PROS1/INSL3/MAP2K1/TSPAN8/TNFAIP3/KIAA0319/PHLDB2/PDGFB/WNT4/RAB3A/PLA2G4A/ABAT/CLDN3/ITGB1/EPHA4/PRKCA/TFPI/ALOX5/SCARF1/F12/DUSP10/F2R/TLR4/PLAU/PROC	40
	BP	GO:0048762	mesenchymal cell differentiation	47/1994	229/18866	6.0684e-06	0.00104886	0.000884709	ALDH1A2/GATA3/BMP2/HIF1A/FOLR1/S100A4/SEMA4B/FN1/EDN1/SMAD4/HMGA2/TGFB2/FOXA1/AKNA/ADAM15/SEMA3F/VASN/SEMA3A/ENG/TGFBR1/DAB2IP/TCF7L2/RDH10/SEMA4A/ANXA6/SEMA4G/TGFB3/PHLDB2/DLG5/EFNA1/WNT4/SMAD7/SEMA3B/BMP4/RGCC/SEMA4C/BCL9L/AXIN2/GLIPR2/NRP2/ISL1/SEMA7A/SEMA4F/DAB2/NOTCH1/LAMA5/KBTBD8	47
	BP	GO:0001654	eye development	69/1994	384/18866	7.17694e-06	0.00121614	0.00102581	ALDH1A2/PAX6/GATA3/MYOM1/TSKU/ATF4/ALDH1A3/SLC7A11/ATP2B4/HIF1A/TFAP2A/EFEMP1/WNT7A/SLC4A5/PTPRM/BDNF/TTLL5/GDF11/TGFB2/KLF4/CDKN1B/VEGFA/TDRD7/GRHL2/SKIL/USH1C/PROX1/PBX1/EPHA2/MITF/BCAR3/NF2/MEIS2/SHROOM2/SLITRK6/MYO7A/RPGRIP1L/NTRK2/MEIS1/MYOM2/WNT7B/CDON/TGFBR1/RDH10/BMPR1B/TUB/PRDM1/RAB18/IFT172/HIPK2/SKI/ACVR2B/BMP4/BBS7/FAT1/OBSL1/HSF4/GPD2/NHS/FSCN2/STRA6/SMOC1/ACHE/VIM/COL5A2/FBN1/RARB/D…	69
	BP	GO:0048608	reproductive structure development	77/1994	443/18866	7.66216e-06	0.001229	0.00103665	REC8/GATA3/GJB1/PPARG/CCN1/CCND1/STC2/HIF1A/NKX3-1/EIF2B2/BCL2L1/SOCS3/WNT7A/YBX3/SMAD4/TFAP2C/TGFB2/CDKN1B/KRT8/VEGFA/GRHL2/FOXA1/INHBB/NR2F2/ADAM15/SIX4/NUDT1/CEBPB/MGST1/WNT7B/MAP2K1/SEMA3A/CRIP1/FBXW8/TGFBR1/ARRB2/RDH10/BMPR1B/FSTL3/HS6ST1/HYAL3/PRDM1/EGLN1/SENP2/STC1/PDGFB/ADGRG1/WNT4/MAMLD1/ING2/AKR1C3/PKD2/TFEB/COL9A3/SERPINA5/ADAMTS1/AXL/BMP4/LFNG/HMGB2/EAF2/BCL2L11/ICAM1/HSD17B2/SIRT1/TN…	77
	BP	GO:0048732	gland development	77/1994	443/18866	7.66216e-06	0.001229	0.00103665	ALDH1A2/ASS1/PAX6/GATA3/TGM2/PCK2/WNT3/HOXB3/ONECUT2/HMOX1/CCND1/ASNS/CSF1/BMP2/POLB/ALDH1A3/HIF1A/PAX8/NKX3-1/CEBPG/SMAD4/RPL30/FA2H/TGFB2/SLC29A1/CDKN1B/VEGFA/FOXA1/UGT1A1/PROX1/XDH/EPHB3/PBX1/EPHA2/BTRC/SIX4/ESRP2/PDX1/RPGRIP1L/KALRN/AACS/CEBPB/WNT7B/MAP2K1/SEMA3A/CRIP1/TGFBR1/FSTL3/TNFAIP3/CFLAR/TGFB3/HNF1A/NTN4/TNFRSF11A/ROBO1/MSN/WNT4/PKD2/PITX1/SERPINA5/BMP4/CPS1/LBH/EAF2/ISL1/ETS1/BCL2L11…	77
	BP	GO:0003281	ventricular septum development	22/1994	76/18866	7.67946e-06	0.001229	0.00103665	GATA3/CCN1/PAX8/SMAD4/TGFB2/HEG1/PROX1/LUZP1/ZFPM1/TGFBR1/PRDM1/EGLN1/CPLANE1/ROBO1/SMAD7/BMP4/FZD2/SOX4/TBX3/SALL4/STRA6/NOTCH1	22
	BP	GO:0061387	regulation of extent of cell growth	28/1994	111/18866	9.03064e-06	0.00140267	0.00118314	WNT3/NRCAM/EFNA5/LRP1/SEMA4B/PAK1/FN1/BDNF/MAPT/VEGFA/PTPRS/SEMA3F/ARHGAP4/SEMA3A/SEMA4A/TWF2/KIAA0319/SEMA4G/MAP1B/SEMA3B/DBN1/SEMA4C/MACF1/SEMA7A/SEMA4F/L1CAM/TRIM46/RND2	28
	BP	GO:0009812	flavonoid metabolic process	9/1994	16/18866	9.25159e-06	0.00140267	0.00118314	UGT1A10/UGT1A7/UGT1A9/UGT1A5/UGT1A3/UGT1A4/UGT1A6/UGT1A8/UGT1A1	9
	BP	GO:0010934	macrophage cytokine production	9/1994	16/18866	9.25159e-06	0.00140267	0.00118314	GAS6/TGFB2/CD74/TGFB3/GPRC5B/SEMA7A/SIRT1/HLA-G/TLR4	9
	BP	GO:0045926	negative regulation of growth	50/1994	254/18866	1.05406e-05	0.00152103	0.00128298	AGT/WNT3/ADRB2/PPARG/CDA/STC2/HIF1A/SEMA4B/PAK1/TLL2/MAPK11/SMAD4/TGFB2/CDKN1B/PTPRS/ADAM15/SEMA3F/MT2A/FGFR3/ARHGAP4/MEIS1/SEMA3A/CAPRIN2/SEMA4A/KIAA0319/SEMA4G/DCBLD2/SEMA3B/BMP4/HYAL2/HYAL1/SEMA4C/TP73/PSRC1/JADE1/CDKN2C/PTPRJ/EAF2/SEMA7A/SEMA4F/SIRT1/NOTCH1/DUSP10/MT1X/CCN3/RGS2/ENPP1/TRIM46/MIR25/NPPA	50
	BP	GO:0061458	reproductive system development	77/1994	447/18866	1.06796e-05	0.00152103	0.00128298	REC8/GATA3/GJB1/PPARG/CCN1/CCND1/STC2/HIF1A/NKX3-1/EIF2B2/BCL2L1/SOCS3/WNT7A/YBX3/SMAD4/TFAP2C/TGFB2/CDKN1B/KRT8/VEGFA/GRHL2/FOXA1/INHBB/NR2F2/ADAM15/SIX4/NUDT1/CEBPB/MGST1/WNT7B/MAP2K1/SEMA3A/CRIP1/FBXW8/TGFBR1/ARRB2/RDH10/BMPR1B/FSTL3/HS6ST1/HYAL3/PRDM1/EGLN1/SENP2/STC1/PDGFB/ADGRG1/WNT4/MAMLD1/ING2/AKR1C3/PKD2/TFEB/COL9A3/SERPINA5/ADAMTS1/AXL/BMP4/LFNG/HMGB2/EAF2/BCL2L11/ICAM1/HSD17B2/SIRT1/TN…	77
	BP	GO:0002088	lens development in camera-type eye	23/1994	83/18866	1.07147e-05	0.00152103	0.00128298	PAX6/GATA3/ATF4/SLC7A11/WNT7A/CDKN1B/TDRD7/SKIL/PROX1/EPHA2/BCAR3/NF2/SHROOM2/SLITRK6/MEIS1/WNT7B/CDON/TGFBR1/HIPK2/SKI/BMP4/NHS/VIM	23
	BP	GO:0060562	epithelial tube morphogenesis	61/1994	331/18866	1.07363e-05	0.00152103	0.00128298	KIF26B/PGF/AGT/LGR5/GATA3/CSF1/BMP2/HIF1A/FOLR1/PAX8/NKX3-1/PAK1/EDN1/RASIP1/SMAD4/TGFB2/VEGFA/GRHL2/FOXA1/NPNT/PODXL/PROX1/LUZP1/PBX1/EPHA2/BTRC/SIX4/ESRP2/TBX6/ENG/NFATC4/RDH10/WNK4/PLXNB2/SHROOM3/DLG5/DLC1/CTSH/NDRG4/WNT4/IFT172/SKI/FZD3/PRKACB/PKD2/BMP4/BBS7/SEMA4C/EPHA4/FZD2/KLHL3/SOX4/TCAP/TNC/TBX3/SALL4/NOTCH1/LAMA5/GLI2/TEAD2/DLL1	61
	BP	GO:0031345	negative regulation of cell projection organization	40/1994	188/18866	1.19906e-05	0.00164193	0.00138496	WNT3/ARHGAP44/DNM3/LRP1/SEMA4B/PLK2/PTPRS/B2M/EVI5L/RAP1GAP/PMP22/SEMA3F/TBX6/ARHGAP4/PLXNB3/PAQR3/NLGN3/SEMA3A/DKK1/NFATC4/SEMA4A/MYLIP/KIAA0319/SEMA4G/MAK/EFNA1/EVL/FYN/SEMA3B/SEMA4C/SYNGAP1/EPHA4/LGALS1/ARPIN/NGEF/SEMA7A/SEMA4F/VIM/PTPRG/TRIM46	40
	BP	GO:0032536	regulation of cell projection size	8/1994	13/18866	1.21232e-05	0.00164193	0.00138496	VIL1/WNT7A/USH1C/EZR/XK/WNT7B/TWF2/CDHR5	8
	BP	GO:0060395	SMAD protein signal transduction	22/1994	78/18866	1.21596e-05	0.00164193	0.00138496	BMP2/SMAD4/GDF11/TGFB2/INHBB/TOB1/TGFBR1/KIAA0319/TGFB3/HIPK2/SKI/VEPH1/SMAD7/BMP8B/BMP4/MAGI2/DAB2/INHA/INHBE/VIM/BMP8A/CCN3	22
	BP	GO:0048592	eye morphogenesis	35/1994	156/18866	1.2441e-05	0.00165408	0.00139521	PAX6/TSKU/ATF4/ALDH1A3/HIF1A/TFAP2A/EFEMP1/PTPRM/BDNF/GDF11/VEGFA/TDRD7/USH1C/PROX1/EPHA2/BCAR3/SHROOM2/MYO7A/RPGRIP1L/NTRK2/MEIS1/CDON/PRDM1/IFT172/HIPK2/SKI/BMP4/FAT1/OBSL1/FSCN2/STRA6/COL5A2/FBN1/RARB/DLL1	35
	BP	GO:1901136	carbohydrate derivative catabolic process	41/1994	195/18866	1.26836e-05	0.00166078	0.00140086	HSPG2/CDA/CSPG4/UPP1/PDE4B/NEU1/ADAMTS9/APOBEC3B/FBXO2/VCAN/PDE4A/GNPDA1/NT5E/GUSB/PDE4C/AMDHD2/CTSL/ENTPD4/NUDT1/AGRN/GPC4/FUCA1/FBXO6/TYMP/HYAL3/SAMHD1/ACOT7/GPD1L/FBXO44/GLA/HYAL2/HYAL1/PDE5A/CEMIP2/NUDT4B/PDE7B/PDE4D/BCAN/NPL/CSPG5/CEMIP	41
	BP	GO:0090257	regulation of muscle system process	50/1994	256/18866	1.31748e-05	0.00169935	0.00143339	TMEM38A/AGT/ADRB2/ACE2/ATP2B4/PAK1/EDN1/CALCRL/PDE4B/SMAD4/BIN1/CCN2/KLF4/ADORA1/NPNT/TNNI2/PTAFR/KCNJ2/CAMK2G/DAPK3/GTF2IRD1/ATP2A1/FBXO32/DMD/ANXA6/STC1/ABAT/SMAD7/ARHGAP42/EHD3/PDE5A/PRKCA/GPER1/PLCE1/OXTR/HDAC4/IL6ST/PDE4D/NOTCH1/FLNA/F2R/TNNT2/RGS2/UTRN/AKAP6/MYL9/MIR25/TNNC1/CHRNA3/NPPA	50
	BP	GO:0015807	L-amino acid transport	21/1994	73/18866	1.36604e-05	0.00173607	0.00146436	AGT/NTSR1/ACE2/SLC7A11/SLC3A2/SLC43A1/SLC1A4/SLC6A9/PRAF2/SLC1A1/SLC1A5/SLC25A22/SLC43A2/SLC7A1/SLC38A1/SLC47A1/SLC25A29/ITGB1/SLC7A5/PER2/RGS2	21
	BP	GO:0010001	glial cell differentiation	46/1994	230/18866	1.53204e-05	0.00189141	0.0015954	PAX6/PPARG/SH3TC2/PHGDH/BMP2/MMP24/EIF2B2/LRP1/PRDM8/MYRF/BIN1/MAPT/FA2H/NR1D1/NSUN5/ABCA2/ERBB3/CLU/PRX/NAB1/NTRK2/NDRG1/NLGN3/MAP2K1/SLC45A3/CDK6/TMEM98/SOX6/GPR157/SKI/KLF15/WASF3/TP73/EPHA4/BNIP3/CDKN2C/SOX4/IL6ST/LAMA2/NOTCH1/CSPG5/EGR2/VIM/DUSP10/TLR4/DLL1	46
	BP	GO:0098657	import into cell	46/1994	230/18866	1.53204e-05	0.00189141	0.0015954	AGT/NTSR1/SLC27A2/ACE2/DNM3/SLC7A11/ATP2B4/FOLR1/SLC3A2/SLC43A1/THBS1/DNM1/SLC29A1/SLC1A4/SLC6A9/SLC9A3/KCNJ2/KCNK5/SLC1A1/SLC19A1/SLC1A5/TRPV6/GLUL/SLC43A2/MX1/CACNG4/SLC7A1/SLC22A3/WNK4/MAPK15/SLC38A1/SLC15A1/SLC47A1/SLC5A1/FYN/WNK2/ITGB1/SLC7A5/OPHN1/RAB3B/CACNA2D1/PER2/ATP1B3/RGS2/MX2/SLC39A5	46
	BP	GO:0042063	gliogenesis	57/1994	307/18866	1.6459e-05	0.00200336	0.00168982	PAX6/PPARG/CSPG4/SH3TC2/PHGDH/CSF1/BMP2/LAMB1/MMP24/EIF2B2/LRP1/MATN2/PRDM8/SUN2/MYRF/BIN1/MAPT/FA2H/TGFB2/NR1D1/NSUN5/ABCA2/ERBB3/CLU/MBOAT7/NF2/PRX/NAB1/NTRK2/NDRG1/NLGN3/MAP2K1/SLC45A3/DAB2IP/CDK6/TMEM98/MYB/ADGRG1/SOX6/GPR157/SKI/KLF15/WASF3/TP73/EPHA4/BNIP3/CDKN2C/SOX4/IL6ST/LAMA2/NOTCH1/CSPG5/EGR2/VIM/DUSP10/TLR4/DLL1	57
	BP	GO:0048738	cardiac muscle tissue development	46/1994	231/18866	1.72045e-05	0.00206502	0.00174183	ALDH1A2/AGT/BMP2/GJC1/PIM1/PAK1/EDN1/MAPK11/SMAD4/ADAMTS9/FHOD3/TGFB2/HEG1/VEGFA/MYH11/PROX1/ERBB3/ZFPM1/SGCB/MEIS1/DKK1/ENG/TGFBR1/ARRB2/EGLN1/SOX6/NDRG4/ALPK3/SMAD7/BMP4/TP73/ITGB1/OBSL1/SIK1/ISL1/TCAP/TBX3/NOTCH1/TNNT2/RGS2/AKAP6/RARB/MIR25/TNNC1/DLL1/NPPA	46
	BP	GO:0070293	renal absorption	9/1994	17/18866	1.78109e-05	0.00210233	0.0017733	GAS6/AQP3/CLDN4/MAGED2/WNK4/HNF1A/AKR1C3/HYAL2/KLHL3	9
	BP	GO:0030516	regulation of axon extension	25/1994	97/18866	1.80019e-05	0.00210233	0.0017733	WNT3/NRCAM/LRP1/SEMA4B/PAK1/FN1/MAPT/VEGFA/PTPRS/SEMA3F/ARHGAP4/SEMA3A/SEMA4A/TWF2/KIAA0319/SEMA4G/MAP1B/SEMA3B/DBN1/SEMA4C/MACF1/SEMA7A/SEMA4F/L1CAM/TRIM46	25
	BP	GO:0051154	negative regulation of striated muscle cell differentiation	15/1994	43/18866	1.85534e-05	0.00213784	0.00180326	CEACAM5/BHLHE41/BMP2/HDAC5/PAK1/BDNF/SMAD4/DKK1/CFLAR/SOX6/HDAC4/NOTCH1/CCN3/RGS2/DLL1	15
	BP	GO:0071902	positive regulation of protein serine/threonine kinase activity	62/1994	345/18866	2.04267e-05	0.00232274	0.00195921	AGT/IRAK2/FGF18/ADRB2/CSPG4/CCND1/BMP2/ATP2B4/PDGFD/PAK1/EDN1/MAPK11/HMGA2/CXCL17/THBS1/CDKN1B/ADORA1/VEGFA/CKS1B/PROX1/CCND2/ADAM8/ADAM9/IGFBP6/CD74/ITGA1/WNT7B/MAP2K1/CD81/DKK1/TGFBR1/DAB2IP/SHC2/TLR9/TGFB3/TNFRSF11A/PDGFB/MAP3K9/ROBO1/TGFA/NOD1/PKD2/BMP4/RGCC/AJUBA/TP73/DUSP5/PSRC1/EPHA4/KSR1/GADD45A/PDE5A/MLKL/PLCE1/SIRT1/MAP3K8/MAP3K10/F2R/FAM20A/TLR4/SPATC1L/CEMIP	62
	BP	GO:0040013	negative regulation of locomotion	69/1994	397/18866	2.23948e-05	0.00250409	0.00211219	GATA3/WNT3/DNAJA4/PPARG/HMOX1/CCL28/HDAC5/ATP2B4/RAP2B/LRP1/SEMA4B/IL27RA/PTPRM/PTGER4/ADAMTS9/IFITM1/THBS1/DUSP1/KLF4/ADORA1/NR2F2/ARHGDIB/ADAM15/IGFBP3/MITF/CD74/NF2/SEMA3F/ARHGAP4/PLXNB3/SEMA3A/ENG/DAB2IP/SEMA4A/TRIB1/SEMA4G/EMILIN1/PHLDB2/MAPK15/STC1/ADGRG1/ROBO1/DLG5/DLC1/GCSAM/NDRG4/WNT4/EVL/SMAD7/TIMP1/SEMA3B/HYAL2/RGCC/MAGI2/SEMA4C/CLDN3/GADD45A/MIR93/ARPIN/PTPRJ/SEMA7A/SEMA4F/NOTCH1/ACVR…	69
	BP	GO:0030073	insulin secretion	43/1994	213/18866	2.26012e-05	0.00250409	0.00211219	CACNA1D/PTPRN2/HIF1A/BAIAP3/EFNA5/LRP1/KLF7/ICA1/INHBB/ADCY5/NR1D1/CPT1A/CAMK2G/SLC9B2/GLUL/PDX1/AACS/TCF7L2/MYO5A/HNF1A/ITPR2/PHPT1/HLA-DRB1/RAPGEF3/MIDN/ABAT/ACVR2B/STXBP4/ITPR1/STX1A/PRKCA/GPER1/ISL1/PFKFB2/SOX4/ALOX5/SIRT4/PER2/ACVR1C/BMP8A/SYT7/CCN3/CACNA2D2	43
	BP	GO:0032535	regulation of cellular component size	67/1994	383/18866	2.36889e-05	0.00259139	0.00218582	WNT3/VIL1/VAV2/NRCAM/IQANK1/EFNA5/LRP1/SEMA4B/ESAM/PAK1/FN1/BAIAP2/EDN1/WNT7A/BDNF/BIN1/FHOD3/MAPT/RILP/ATP13A2/HAX1/VEGFA/BAIAP2L2/ARPC1A/DEPTOR/USH1C/SPIRE2/EZR/NCK1/PTPRS/SEMA3F/XK/ARHGAP4/WNT7B/SPTB/SEMA3A/SEMA4A/TWF2/KIAA0319/SEMA4G/MSN/EVL/TMOD4/TMOD2/WASF3/MAP1B/CDC42EP5/SEMA3B/DBN1/VAV1/SEMA4C/MACF1/RAB3B/ARPIN/GMFB/ICAM1/SEMA7A/SEMA4F/CDHR5/CRACD/HCLS1/L1CAM/SCIN/KANK3/TRIM46/RND2/GNB3	67
	BP	GO:0048675	axon extension	29/1994	123/18866	2.52942e-05	0.00269868	0.00227632	WNT3/NRCAM/LRP1/SEMA4B/PAK1/FN1/BDNF/MAPT/VEGFA/PTPRS/SEMA3F/ARHGAP4/NLGN3/SEMA3A/SEMA4A/TWF2/KIAA0319/SEMA4G/MAP1B/SEMA3B/DBN1/SEMA4C/ITGB1/NRP2/MACF1/SEMA7A/SEMA4F/L1CAM/TRIM46	29
	BP	GO:0071466	cellular response to xenobiotic stimulus	29/1994	123/18866	2.52942e-05	0.00269868	0.00227632	UGT1A10/AADAC/UGT1A7/UGT1A9/UGT1A5/UGT1A3/UGT1A4/UGT1A6/CYB5R3/CRYZ/CYB5B/UGT1A8/CYP2E1/ACY1/UGT1A1/NAT1/MGST1/RORC/GSTA1/MCM7/CYP2J2/NQO1/AKR7L/AOC1/CES3/CYP26B1/PTGS1/GSTM1/CYP2S1	29
	BP	GO:0050796	regulation of insulin secretion	38/1994	181/18866	2.6828e-05	0.00282741	0.0023849	CACNA1D/HIF1A/BAIAP3/EFNA5/LRP1/KLF7/ICA1/INHBB/ADCY5/NR1D1/CPT1A/SLC9B2/GLUL/PDX1/AACS/TCF7L2/ITPR2/PHPT1/HLA-DRB1/RAPGEF3/MIDN/ABAT/STXBP4/ITPR1/STX1A/PRKCA/GPER1/ISL1/PFKFB2/SOX4/ALOX5/SIRT4/PER2/ACVR1C/BMP8A/SYT7/CCN3/CACNA2D2	38
	BP	GO:0009410	response to xenobiotic stimulus	30/1994	130/18866	2.86882e-05	0.00298703	0.00251954	UGT1A10/AADAC/UGT1A7/UGT1A9/UGT1A5/UGT1A3/UGT1A4/UGT1A6/CYB5R3/CRYZ/CYB5B/UGT1A8/CYP2E1/ACY1/UGT1A1/NAT1/MGST1/RORC/GSTA1/MCM7/GCLC/CYP2J2/NQO1/AKR7L/AOC1/CES3/CYP26B1/PTGS1/GSTM1/CYP2S1	30
	BP	GO:0060560	developmental growth involved in morphogenesis	46/1994	236/18866	3.0247e-05	0.00300333	0.00253329	KIF26B/WNT3/CSF1/NRCAM/EFNA5/LRP1/SEMA4B/PAK1/FN1/BDNF/MAPT/VEGFA/SYT1/PTPRS/SEMA3F/SIX4/ARHGAP4/WNT7B/NLGN3/SEMA3A/RDH10/SEMA4A/TWF2/SMURF1/KIAA0319/SYT17/SEMA4G/MAP1B/SEMA3B/BMP4/DBN1/MAGI2/SEMA4C/ITGB1/NRP2/MACF1/SEMA7A/SEMA4F/RNF157/TNC/UNC13A/PAK6/NOTCH1/L1CAM/TRIM46/RND2	46
	BP	GO:0033627	cell adhesion mediated by integrin	20/1994	71/18866	3.04905e-05	0.00300333	0.00253329	ITGB7/TGFB2/NPNT/PODXL/ITGA5/ITGB6/EPHA2/ADAM9/PDE3B/EFNA1/FERMT1/ITGB1/JAM3/ACER2/ICAM1/CCN3/ITGB2/ITGB8/FBN1/PLAU	20
	BP	GO:0032967	positive regulation of collagen biosynthetic process	11/1994	26/18866	3.05455e-05	0.00300333	0.00253329	CCN2/ENG/ARRB2/TGFB3/MYB/WNT4/BMP4/RGCC/CREB3L1/VIM/F2R	11
	BP	GO:0006805	xenobiotic metabolic process	28/1994	118/18866	3.05824e-05	0.00300333	0.00253329	UGT1A10/AADAC/UGT1A7/UGT1A9/UGT1A5/UGT1A3/UGT1A4/UGT1A6/CYB5R3/CRYZ/CYB5B/UGT1A8/CYP2E1/ACY1/UGT1A1/NAT1/MGST1/RORC/GSTA1/CYP2J2/NQO1/AKR7L/AOC1/CES3/CYP26B1/PTGS1/GSTM1/CYP2S1	28
	BP	GO:0033559	unsaturated fatty acid metabolic process	28/1994	118/18866	3.05824e-05	0.00300333	0.00253329	MGLL/EDN1/CYP2E1/SCD/CD74/FADS3/SCD5/FADS1/FABP5/AKR1C4/GSTA1/TBXAS1/CYP2J2/ACOX1/AKR1C3/PLA2G4A/CYP4F11/PTGES/PTGS1/ELOVL6/SIRT1/ALOX5/ELOVL7/EPHX2/PLA2G4F/FADS2/GSTM1/CYP2S1	28
	BP	GO:0030072	peptide hormone secretion	49/1994	257/18866	3.09463e-05	0.00300492	0.00253463	CACNA1D/PTPRN2/HIF1A/PAX8/BAIAP3/EFNA5/LRP1/EDN1/KLF7/ICA1/INHBB/ADCY5/NR1D1/CPT1A/ILDR1/RAB8B/CAMK2G/SLC9B2/GLUL/PDX1/KALRN/AACS/TCF7L2/MYO5A/HNF1A/ITPR2/PHPT1/HLA-DRB1/RAPGEF3/MIDN/ABAT/ACVR2B/STXBP4/ITPR1/STX1A/PRKCA/GPER1/ISL1/PFKFB2/SOX4/SMPD3/ALOX5/SIRT4/PER2/ACVR1C/BMP8A/SYT7/CCN3/CACNA2D2	49
	BP	GO:0042552	myelination	31/1994	137/18866	3.20093e-05	0.00306109	0.00258201	GNPAT/SH3TC2/EIF2B2/PLLP/MYRF/FA2H/CTSC/MARVELD1/GAL3ST1/NSUN5/ABCA2/CLU/PMP22/PRX/NAB1/XK/NTRK2/NDRG1/TMEM98/MYO5A/TYMP/SKI/WASF3/CMTM8/MAL2/FAM126A/KLK6/JAM3/EGR2/BCAS1/RARB	31
	BP	GO:0052695	cellular glucuronidation	9/1994	18/18866	3.22759e-05	0.00306109	0.00258201	UGT1A10/UGT1A7/UGT1A9/UGT1A5/UGT1A3/UGT1A4/UGT1A6/UGT1A8/UGT1A1	9
	BP	GO:0002089	lens morphogenesis in camera-type eye	10/1994	22/18866	3.31911e-05	0.00306109	0.00258201	ATF4/TDRD7/PROX1/EPHA2/BCAR3/SHROOM2/MEIS1/HIPK2/SKI/BMP4	10
	BP	GO:0046058	cAMP metabolic process	10/1994	22/18866	3.31911e-05	0.00306109	0.00258201	PDE4B/PDE4A/ADCY4/PDE4C/ADCY5/EPHA2/ADCY9/ADCY3/PDE7B/PDE4D	10
	BP	GO:0009187	cyclic nucleotide metabolic process	14/1994	40/18866	3.365e-05	0.00306109	0.00258201	GUCY1B1/PDE4B/PDE4A/ADCY4/PDE4C/ADCY5/EPHA2/ADCY9/ADCY3/GUCY2C/PDE5A/PDE7B/PDE4D/NPPA	14
	BP	GO:0071526	semaphorin-plexin signaling pathway	14/1994	40/18866	3.365e-05	0.00306109	0.00258201	SEMA4B/PLXNA2/SEMA3F/PLXNB3/SEMA3A/SEMA4A/SEMA4G/PLXNB2/SEMA3B/SEMA4C/NRP2/SEMA7A/SEMA4F/FLNA	14
	BP	GO:0099177	regulation of trans-synaptic signaling	76/1994	455/18866	3.61506e-05	0.00325431	0.00274499	AGT/NTSR1/PLAT/TMEM25/SYNPO/ADRB2/CACNA1D/ATF4/SLC7A11/BAIAP3/GUCY1B1/BAIAP2/EDN1/WNT7A/CALB2/SQSTM1/AKAP5/CNIH2/BDNF/PINK1/TPRG1L/MAPT/VAMP1/DNM1/ADORA1/LRP8/PLK2/SYT1/PTPRS/BTBD9/CLSTN3/GLUL/FABP5/NTRK2/GNAI1/NLGN3/DKK1/ARRB2/NFATC4/CACNG4/EGLN1/RAB3A/PRKAR2B/ABAT/FYN/NSMF/MAP1B/DBN1/SYNGAP1/ITGB1/EPHA4/CPEB3/STX1A/OPHN1/RAB3B/MPP2/STXBP1/GPER1/PPFIA3/OXTR/LAMA2/UNC13A/SYT12/MAP1A/CSPG5/ACHE/EG…	76
	BP	GO:0045765	regulation of angiogenesis	69/1994	403/18866	3.67366e-05	0.00327296	0.00276072	PGF/AGT/ADM2/HSPG2/FGF18/PPARG/HMOX1/CXCL8/HDAC5/ATP2B4/HIF1A/FBLN5/SRPX2/PTPRM/VEGFB/ANXA3/ADAMTS9/HMGA2/C3/EMP2/THBS1/TGFB2/KLF4/VEGFA/DDAH1/PLK2/ITGA5/EPHA2/SP1/LRG1/GLUL/EMC10/ECM1/ENG/DAB2IP/SEMA4A/TNFAIP3/HTATIP2/EMILIN1/EGLN1/AMOT/PDE3B/CTSH/EFNA1/HIPK2/RAPGEF3/ADAMTS1/RGCC/HYAL1/S100A1/ITGB1/JCAD/GADD45A/CEMIP2/PRKCA/ISL1/ETS1/SIRT1/FUT1/ALOX5/HLA-G/COL4A3/ADGRB2/CREB3L1/NOTCH1/ITGB2/STAB…	69
	BP	GO:0002791	regulation of peptide secretion	66/1994	381/18866	3.71747e-05	0.0032782	0.00276514	MYOM1/CACNA1D/HIF1A/PAX8/BAIAP3/EFNA5/LRP1/PTGER4/KLF7/ICA1/TGFB2/ABCG1/ATP13A2/ADORA1/INHBB/NR1H3/EZR/ADCY5/NR1D1/CPT1A/ILDR1/ADAM8/ADAM9/RAB8B/SLC9B2/CD74/GLUL/PDX1/KALRN/AACS/BTN2A2/RAB11FIP3/TCF7L2/TLR9/TGFB3/P3H1/ITPR2/PHPT1/CADM1/HLA-DRB1/RAPGEF3/MIDN/ABAT/STXBP4/ITPR1/RGCC/RSAD2/MIR93/STX1A/PRKCA/EXPH5/GPER1/ISL1/PFKFB2/SOX4/ALOX5/SIRT4/PER2/ACVR1C/ACHE/BMP8A/SYT7/F2R/CCN3/CACNA2D2/TLR4	66
	BP	GO:0061041	regulation of wound healing	33/1994	151/18866	3.82561e-05	0.00333948	0.00281683	PLAT/VIL1/CLDN4/EDN1/DUOX2/THBS1/OCLN/UBASH3B/THBD/CADM4/DUOX1/MYLK/PROS1/INSL3/TSPAN8/TNFAIP3/PHLDB2/PDGFB/WNT4/RAB3A/PLA2G4A/ABAT/CLDN3/ITGB1/PRKCA/TFPI/ALOX5/F12/DUSP10/F2R/TLR4/PLAU/PROC	33
	BP	GO:0032147	activation of protein kinase activity	59/1994	331/18866	4.0887e-05	0.00350076	0.00295287	AGT/GAS6/IRAK2/ADRB2/CSPG4/TNFSF15/BMP2/EFNA5/AGAP2/PAK1/MAPK11/PINK1/CXCL17/EMP2/THBS1/TGFB2/MALT1/ADORA1/VEGFA/ADCY4/ADCY5/ADAM9/ADCY9/IGFBP6/CD74/ITGA1/WNT7B/MAP2K1/CD81/TGFBR1/DAB2IP/SHC2/MAP4K4/ADCY3/TGFB3/PDGFB/MAP3K9/TGFA/NOD1/PILRB/PRKACB/PRKAR2B/GPRC5B/ACVR2B/BMP4/RGCC/TP73/DUSP5/KSR1/GADD45A/MLKL/PLCE1/TPX2/MAP3K8/MAP3K10/PAK6/F2R/TLR4/CHRNA3	59
	BP	GO:0001755	neural crest cell migration	17/1994	56/18866	4.15553e-05	0.00350076	0.00295287	HIF1A/FOLR1/SEMA4B/FN1/SEMA3F/SEMA3A/SEMA4A/ANXA6/SEMA4G/SEMA3B/BMP4/SEMA4C/NRP2/ISL1/SEMA7A/SEMA4F/LAMA5	17
	BP	GO:0048638	regulation of developmental growth	62/1994	353/18866	4.1569e-05	0.00350076	0.00295287	WNT3/ADRB2/VIL1/STC2/CSF1/NRCAM/PIM1/EFNA5/LRP1/SEMA4B/PAK1/FN1/EDN1/YBX3/TLL2/BDNF/MAPK11/MAPT/CDKN1B/VEGFA/SYT1/EZR/PROX1/PTPRS/SEMA3F/SIX4/AGRN/FGFR3/ARHGAP4/MEIS1/SEMA3A/TGFBR1/MTM1/SEMA4A/TWF2/SMURF1/KIAA0319/SYT17/SEMA4G/SMAD7/MAP1B/SEMA3B/BMP4/DBN1/SEMA4C/TP73/MACF1/BCL2L11/SEMA7A/SEMA4F/RNF157/UNC13A/NOTCH1/DUSP10/RGS2/L1CAM/CACNA2D2/TRIM46/RND2/AKAP6/MIR25/DLL1	62
	BP	GO:0007272	ensheathment of neurons	31/1994	139/18866	4.30625e-05	0.00350076	0.00295287	GNPAT/SH3TC2/EIF2B2/PLLP/MYRF/FA2H/CTSC/MARVELD1/GAL3ST1/NSUN5/ABCA2/CLU/PMP22/PRX/NAB1/XK/NTRK2/NDRG1/TMEM98/MYO5A/TYMP/SKI/WASF3/CMTM8/MAL2/FAM126A/KLK6/JAM3/EGR2/BCAS1/RARB	31
	BP	GO:0008366	axon ensheathment	31/1994	139/18866	4.30625e-05	0.00350076	0.00295287	GNPAT/SH3TC2/EIF2B2/PLLP/MYRF/FA2H/CTSC/MARVELD1/GAL3ST1/NSUN5/ABCA2/CLU/PMP22/PRX/NAB1/XK/NTRK2/NDRG1/TMEM98/MYO5A/TYMP/SKI/WASF3/CMTM8/MAL2/FAM126A/KLK6/JAM3/EGR2/BCAS1/RARB	31
	BP	GO:0014031	mesenchymal cell development	22/1994	84/18866	4.30812e-05	0.00350076	0.00295287	ALDH1A2/HIF1A/FOLR1/SEMA4B/FN1/EDN1/SEMA3F/SEMA3A/RDH10/SEMA4A/ANXA6/SEMA4G/SEMA3B/BMP4/SEMA4C/NRP2/ISL1/SEMA7A/SEMA4F/NOTCH1/LAMA5/KBTBD8	22
	BP	GO:0048864	stem cell development	22/1994	84/18866	4.30812e-05	0.00350076	0.00295287	ALDH1A2/HIF1A/FOLR1/SEMA4B/FN1/EDN1/WNT7A/SEMA3F/SEMA3A/RDH10/SEMA4A/ANXA6/SEMA4G/SEMA3B/BMP4/SEMA4C/NRP2/ISL1/SEMA7A/SEMA4F/LAMA5/KBTBD8	22
	BP	GO:0090287	regulation of cellular response to growth factor stimulus	56/1994	310/18866	4.33443e-05	0.00350076	0.00295287	AGT/GATA3/GRB10/FGF18/ONECUT2/PCSK6/CCN1/PRDM16/ATP2B4/HIF1A/FOLR1/SMAD4/THBS1/SKIL/NPNT/ITGA5/XDH/CADM4/GOT1/LRG1/VASN/TOB1/FAM20C/RUNX2/DKK1/ELAPOR2/ENG/TGFBR1/DAB2IP/FSTL3/SMURF1/CFLAR/EMILIN1/TGFB3/ROBO1/RBPMS2/WNT4/FERMT1/HIPK2/SKI/ING2/VEPH1/SMAD7/PPP2R5B/CAV2/BMP4/BCL9L/JCAD/FGFBP3/SIRT1/DAB2/CREB3L1/NOTCH1/WFIKKN1/FBN1/DLL1	56
	BP	GO:0002062	chondrocyte differentiation	26/1994	108/18866	4.45116e-05	0.00356176	0.00300432	FGF18/BMP2/TGFBI/EFEMP1/WNT7A/HMGA2/CCN2/FGFR3/RUNX2/ECM1/POC1A/TGFBR1/BMPR1B/ANXA6/SOX6/LTBP3/SMAD7/BMP4/AXIN2/COL27A1/SMPD3/CCN3/GLI2/ADAMTS7/SCIN/RARB	26
	BP	GO:0010714	positive regulation of collagen metabolic process	11/1994	27/18866	4.6634e-05	0.00364747	0.00307662	CCN2/ENG/ARRB2/TGFB3/MYB/WNT4/BMP4/RGCC/CREB3L1/VIM/F2R	11
	BP	GO:0001894	tissue homeostasis	49/1994	261/18866	4.67555e-05	0.00364747	0.00307662	MUC4/SNX10/ADRB2/CSF1/ESAM/IL20RB/PIGR/IL20RA/CCN2/OCLN/VEGFA/USH1C/INPP5D/UBASH3B/TMEM64/B2M/ADAM8/MUC6/SLC1A1/SPATA7/SLC22A5/CIB2/TNFAIP3/TUB/DMD/TLR9/ADGRV1/TNFRSF11A/IQCB1/PPARGC1B/MAK/CTSH/LTBP3/MUC13/CLDN3/ITGB1/CUBN/PRKCA/JAM3/ZG16B/TFF1/LAMA2/CRACD/CROCC/BARD1/NOTCH1/F2R/TP53INP2/TLR4	49
	BP	GO:0090092	regulation of transmembrane receptor protein serine/threonine kinase signaling pathway	48/1994	254/18866	4.6849e-05	0.00364747	0.00307662	ONECUT2/PCSK6/CCN1/PRDM16/BMP2/FOLR1/SMAD4/THBS1/GDF11/TGFB2/SKIL/NPNT/INHBB/GOT1/LRG1/VASN/TOB1/DKK1/ELAPOR2/ENG/TGFBR1/FSTL3/SMURF1/KIAA0319/EMILIN1/TGFB3/RBPMS2/FERMT1/HIPK2/SKI/ING2/VEPH1/SMAD7/ACVR2B/CAV2/BMP8B/BMP4/MAGI2/BCL9L/SIRT1/DAB2/INHA/INHBE/NOTCH1/BMP8A/CCN3/WFIKKN1/FBN1	48
	BP	GO:0090276	regulation of peptide hormone secretion	42/1994	213/18866	4.97481e-05	0.00382174	0.00322361	CACNA1D/HIF1A/PAX8/BAIAP3/EFNA5/LRP1/KLF7/ICA1/INHBB/ADCY5/NR1D1/CPT1A/ILDR1/RAB8B/SLC9B2/GLUL/PDX1/KALRN/AACS/TCF7L2/ITPR2/PHPT1/HLA-DRB1/RAPGEF3/MIDN/ABAT/STXBP4/ITPR1/STX1A/PRKCA/GPER1/ISL1/PFKFB2/SOX4/ALOX5/SIRT4/PER2/ACVR1C/BMP8A/SYT7/CCN3/CACNA2D2	42
	BP	GO:0071496	cellular response to external stimulus	58/1994	326/18866	4.99718e-05	0.00382174	0.00322361	AGT/GAS6/CBS/MMP7/PPARG/HMOX1/ATF4/AQP3/ASNS/FOLR1/PIM1/RRAGD/CASP1/MARS1/UPP1/PTGER4/TBL2/SZT2/TMEM150C/RRAGB/ZFYVE1/INHBB/DNAJC15/KCNJ2/GOT1/ATF3/GLUL/FADS1/NUDT1/KANK2/ENG/FOXA3/SESN3/GCLC/WNT4/AKR1C3/GSDMD/AOC1/TFEB/LAMP2/AXL/GADD45A/BNIP3/SIK1/ELAPOR1/PRKAA2/ICAM1/HDAC4/SIRT1/PHEX/TNC/FNIP1/RNF152/PMAIP1/NUAK2/TLR4/NPPA/SLC39A5	58
	BP	GO:0007517	muscle organ development	69/1994	407/18866	5.05807e-05	0.00382417	0.00322566	ASS1/MYOM1/BMP2/PIM1/PAK1/EDN1/YBX3/TLL2/SFMBT1/MAPK11/MRAS/SMAD4/TGFB2/HEG1/NR2F2/POU6F1/PROX1/ERBB3/MYLK/ATF3/MYORG/ZFPM1/SIX4/XK/SGCB/MEIS1/MYOM2/CDON/DKK1/ENG/TGFBR1/ARRB2/MTM1/ZBTB18/DMD/SRPK3/CFLAR/FLNB/IGSF8/EGLN1/SOX6/SKI/SMAD7/PITX1/CAV2/BMP4/BCL9L/CYP26B1/TP73/FZD2/ISL1/SAP30/HDAC4/SIRT1/TCAP/LAMA2/STRA6/NOTCH1/ADARB1/EGR2/ARID5B/LAMA5/TNNT2/RGS2/UTRN/AKAP6/MIR25/TNNC1/DLL1	69
	BP	GO:0048640	negative regulation of developmental growth	27/1994	115/18866	5.12913e-05	0.00382417	0.00322566	WNT3/ADRB2/STC2/SEMA4B/PAK1/TLL2/MAPK11/CDKN1B/PTPRS/SEMA3F/FGFR3/ARHGAP4/MEIS1/SEMA3A/SEMA4A/KIAA0319/SEMA4G/SEMA3B/BMP4/SEMA4C/TP73/SEMA7A/SEMA4F/DUSP10/RGS2/TRIM46/MIR25	27
	BP	GO:0090596	sensory organ morphogenesis	50/1994	269/18866	5.1415e-05	0.00382417	0.00322566	PAX6/GATA3/TSKU/ATF4/ALDH1A3/HIF1A/PAX8/TFAP2A/EFEMP1/EDN1/PTPRM/BDNF/GDF11/VEGFA/TDRD7/USH1C/PROX1/EPHA2/BCAR3/SHROOM2/SLITRK6/SIX4/MYO7A/RPGRIP1L/NTRK2/MEIS1/CDON/MYO15A/PDZD7/PRDM1/IFT172/HIPK2/SKI/FZD3/BMP4/CYP26B1/FAT1/OBSL1/FZD2/FSCN2/TCAP/LRIG1/STRA6/OTX1/GLI2/KCNQ4/COL5A2/FBN1/RARB/DLL1	50
	BP	GO:0006937	regulation of muscle contraction	36/1994	173/18866	5.24829e-05	0.00382417	0.00322566	TMEM38A/ADRB2/ACE2/EDN1/CALCRL/PDE4B/BIN1/CCN2/ADORA1/NPNT/TNNI2/PTAFR/KCNJ2/DAPK3/ATP2A1/DMD/ANXA6/STC1/ABAT/SMAD7/ARHGAP42/EHD3/PDE5A/GPER1/PLCE1/OXTR/HDAC4/PDE4D/FLNA/F2R/TNNT2/RGS2/MYL9/TNNC1/CHRNA3/NPPA	36
	BP	GO:0006063	uronic acid metabolic process	10/1994	23/18866	5.31669e-05	0.00382417	0.00322566	UGT1A10/UGT1A7/UGT1A9/UGT1A5/UGT1A3/UGT1A4/UGT1A6/UGT1A8/UGT1A1/XYLB	10
	BP	GO:0019585	glucuronate metabolic process	10/1994	23/18866	5.31669e-05	0.00382417	0.00322566	UGT1A10/UGT1A7/UGT1A9/UGT1A5/UGT1A3/UGT1A4/UGT1A6/UGT1A8/UGT1A1/XYLB	10
	BP	GO:0051952	regulation of amine transport	23/1994	91/18866	5.35436e-05	0.00382417	0.00322566	AGT/NTSR1/ACE2/SYT13/PINK1/SLC43A1/ADORA1/SYT1/SLC43A2/SYT17/RAB3A/ABAT/SYT8/ITGB1/STX1A/RAB3B/STXBP1/OXTR/PER2/SYT12/SYT7/RGS2/CHRNA3	23
	BP	GO:0060021	roof of mouth development	23/1994	91/18866	5.35436e-05	0.00382417	0.00322566	PRDM16/FRAS1/TFAP2A/WNT7A/COL11A2/SMAD4/GDF11/TGFB2/EPHB3/JAG2/TGFBR1/TGFB3/CPLANE1/IFT172/SKI/SATB2/ACVR2B/BBS7/FZD2/GABRB3/TBX3/ARID5B/WFIKKN1	23
	BP	GO:0043405	regulation of MAP kinase activity	60/1994	342/18866	5.67368e-05	0.0040077	0.00338047	AGT/TRIB3/IRAK2/FGF18/CSPG4/BMP2/PDGFD/PAK1/EDN1/MAPK11/CXCL17/THBS1/DUSP1/ADORA1/VEGFA/SMPD1/IGF1R/ADAM8/ADAM9/IGFBP6/CD74/ITGA1/PAQR3/WNT7B/MAP2K1/CD81/DKK1/TGFBR1/DAB2IP/SHC2/TLR9/TRIB1/TGFB3/TNFRSF11A/PDGFB/MAP3K9/ROBO1/TGFA/NOD1/BMP4/HYAL2/AJUBA/TP73/DUSP5/EPHA4/KSR1/GADD45A/DUSP16/MAPK8IP1/PDE5A/MLKL/PTPRJ/PLCE1/MAP3K8/MAP3K10/DUSP10/F2R/RGS2/TLR4/NPPA	60
	BP	GO:1903532	positive regulation of secretion by cell	56/1994	313/18866	5.70408e-05	0.0040077	0.00338047	AGT/NTSR1/MYOM1/CACNA1D/HIF1A/NKX3-1/BAIAP3/LRP1/EDN1/PTGER4/PINK1/SMAD4/TGFB2/ABCG1/ATP13A2/NMB/INHBB/SYT1/EZR/PTAFR/ILDR1/ADAM8/ADAM9/RAB8B/GLUL/PDX1/AACS/TCF7L2/HYAL3/TGFB3/MYB/TNFRSF11A/PHPT1/CADM1/RAB3A/HLA-DRB1/ABAT/RAB15/RGCC/VAMP7/STX1A/EXPH5/STXBP1/GPER1/ISL1/PFKFB2/SOX4/OXTR/SMPD3/UNC13A/INHA/ACHE/SYT7/ITGB2/TLR4/NPPA	56
	BP	GO:0050804	modulation of chemical synaptic transmission	75/1994	454/18866	5.89117e-05	0.00410577	0.00346319	AGT/NTSR1/PLAT/TMEM25/SYNPO/ADRB2/CACNA1D/ATF4/SLC7A11/BAIAP3/GUCY1B1/BAIAP2/EDN1/WNT7A/CALB2/SQSTM1/AKAP5/CNIH2/BDNF/PINK1/TPRG1L/MAPT/VAMP1/DNM1/ADORA1/LRP8/PLK2/SYT1/PTPRS/BTBD9/CLSTN3/GLUL/NTRK2/GNAI1/NLGN3/DKK1/ARRB2/NFATC4/CACNG4/EGLN1/RAB3A/PRKAR2B/ABAT/FYN/NSMF/MAP1B/DBN1/SYNGAP1/ITGB1/EPHA4/CPEB3/STX1A/OPHN1/RAB3B/MPP2/STXBP1/GPER1/PPFIA3/OXTR/LAMA2/UNC13A/SYT12/MAP1A/CSPG5/ACHE/EGR2/SYT…	75
	BP	GO:0014032	neural crest cell development	21/1994	80/18866	6.15244e-05	0.00425355	0.00358785	ALDH1A2/HIF1A/FOLR1/SEMA4B/FN1/EDN1/SEMA3F/SEMA3A/RDH10/SEMA4A/ANXA6/SEMA4G/SEMA3B/BMP4/SEMA4C/NRP2/ISL1/SEMA7A/SEMA4F/LAMA5/KBTBD8	21
	BP	GO:0090100	positive regulation of transmembrane receptor protein serine/threonine kinase signaling pathway	26/1994	110/18866	6.21153e-05	0.00426032	0.00359356	CCN1/BMP2/SMAD4/THBS1/GDF11/TGFB2/NPNT/INHBB/GOT1/LRG1/ELAPOR2/ENG/TGFBR1/KIAA0319/TGFB3/FERMT1/HIPK2/ING2/ACVR2B/BMP8B/BMP4/DAB2/INHA/INHBE/NOTCH1/BMP8A	26
	BP	GO:0050772	positive regulation of axonogenesis	22/1994	86/18866	6.34574e-05	0.0043181	0.00364229	WNT3/EFNA5/LRP1/PAK1/FN1/BDNF/MAPT/VEGFA/SKIL/PLXNA2/NTRK2/PLXNB3/MAP2K1/TWF2/PLXNB2/ROBO1/MAP1B/DBN1/MACF1/SEMA7A/L1CAM/RND2	22
	BP	GO:0051552	flavone metabolic process	5/1994	6/18866	7.18589e-05	0.0048516	0.00409229	UGT1A10/UGT1A7/UGT1A9/UGT1A8/UGT1A1	5
	BP	GO:0055001	muscle cell development	37/1994	183/18866	7.89582e-05	0.00528959	0.00446174	AGT/PAK1/EDN1/SMAD4/BIN1/FHOD3/KRT8/VEGFA/MYH11/PROX1/MYORG/SIX4/XK/SGCB/ENG/NFATC4/DMD/CFLAR/ALPK3/SKI/TMOD4/TMOD2/CAV2/BMP4/ITGB1/OBSL1/HDAC4/TCAP/TBX3/FLNC/NOTCH1/TNNT2/RGS2/WFIKKN1/CACNA2D2/AKAP6/NPPA	37
	BP	GO:0042573	retinoic acid metabolic process	12/1994	33/18866	7.96323e-05	0.00529371	0.00446521	ALDH1A2/ALDH1A3/UGT1A7/UGT1A9/UGT1A3/UGT1A8/UGT1A1/RDH10/AKR1C3/CYP26B1/DHRS9/CYP2S1	12
	BP	GO:0052547	regulation of peptidase activity	76/1994	466/18866	8.11481e-05	0.00535329	0.00451547	AGT/LXN/TIMP3/RARRES1/GAS6/VIL1/PPARG/CCN1/TNFSF15/SOX7/NKX3-1/CLDN4/LRP1/WFDC2/CASP1/FN1/PAPLN/CSTB/PINK1/SERPINB8/BIN1/MAPT/C3/THBS1/TIMP2/CCN2/KLF4/MALT1/ATP13A2/VEGFA/TFAP4/COL7A1/XDH/ABCA2/PROS1/RPS27L/CARD9/USP14/IFI6/SPINK1/ECM1/DAPK1/HERPUD1/ARRB2/HMSD/SERPINA1/CFLAR/ROBO1/DLC1/CTSH/EFNA1/NOD1/FYN/SERPINA5/SPOCK2/TIMP1/CLDN3/EPHA4/ITIH2/GPER1/TFPI/ACER2/BCL2L11/SIRT1/COL4A3/SSPOP/TIMP4/AC…	76
	BP	GO:0030900	forebrain development	66/1994	391/18866	8.33613e-05	0.00544387	0.00459187	ALDH1A2/PAX6/TSKU/BMP2/LAMB1/ALDH1A3/SLC7A11/ATP2B4/HIF1A/NOTCH3/NDE1/LRP1/SUN2/WNT7A/TACC1/ANXA3/SZT2/LRP8/NR2F2/PROX1/AKNA/NSUN5/PTPRS/B2M/EPHB3/MBOAT7/NF2/NDST1/RPGRIP1L/NTRK2/WNT7B/DYNC2H1/WDR47/SEMA3A/CDON/DKK1/DAB2IP/CDK6/GNG12/DOCK7/ADGRG1/ROBO1/DLC1/WNT4/SKI/SATB2/FYN/PITX1/MYO1D/AXL/BMP4/NRP2/BNIP3/OPHN1/ISL1/ETS1/OXTR/SEMA7A/FUT1/BCAN/TBX3/NOTCH1/FLNA/OTX1/GLI2/RARB	66
	BP	GO:0030517	negative regulation of axon extension	14/1994	43/18866	8.37809e-05	0.00544387	0.00459187	WNT3/SEMA4B/PTPRS/SEMA3F/ARHGAP4/SEMA3A/SEMA4A/KIAA0319/SEMA4G/SEMA3B/SEMA4C/SEMA7A/SEMA4F/TRIM46	14
	BP	GO:0060541	respiratory system development	40/1994	204/18866	8.45043e-05	0.0054499	0.00459696	ALDH1A2/ASS1/FGF18/SIM2/ALDH1A3/SLC7A11/CCN2/HEG1/AIMP2/VEGFA/GRHL2/FOXA1/PROX1/PHF14/SIX4/ESRP2/RPGRIP1L/WNT7B/MAP2K1/SPDEF/RDH10/FSTL3/HS6ST1/TGFB3/DLG5/CTSH/RAB3A/SKI/LTBP3/ACVR2B/BMP4/EIF4EBP1/RC3H2/SMPD3/PHEX/TNC/STRA6/NOTCH1/LAMA5/GLI2	40
	BP	GO:0010770	positive regulation of cell morphogenesis involved in differentiation	33/1994	157/18866	8.60681e-05	0.00546912	0.00461317	WNT3/EFNA5/LRP1/PAK1/FN1/BAIAP2/BDNF/MAPT/VEGFA/LRP8/SKIL/PLXNA2/ANKRD27/NTRK2/KALRN/PLXNB3/MAP2K1/CAPRIN2/FBXW8/TWF2/PLXNB2/ROBO1/MAP1B/DBN1/VAMP7/OBSL1/EPHA4/MACF1/SEMA7A/CSPG5/FLNA/L1CAM/RND2	33
	BP	GO:0098739	import across plasma membrane	33/1994	157/18866	8.60681e-05	0.00546912	0.00461317	AGT/NTSR1/ACE2/SLC7A11/ATP2B4/FOLR1/SLC3A2/SLC43A1/THBS1/SLC1A4/SLC6A9/SLC9A3/KCNJ2/KCNK5/SLC1A1/SLC19A1/SLC1A5/TRPV6/SLC43A2/SLC7A1/WNK4/SLC15A1/SLC47A1/SLC5A1/FYN/WNK2/ITGB1/SLC7A5/CACNA2D1/PER2/ATP1B3/RGS2/SLC39A5	33
	BP	GO:0003012	muscle system process	76/1994	467/18866	8.71181e-05	0.00549544	0.00463537	TMEM38A/AGT/STAC/MYOM1/ADRB2/HMOX1/CACNA1D/ACE2/GJC1/ATP2B4/PAK1/EDN1/CALCRL/TPM4/PDE4B/VEGFB/SSPN/SMAD4/BIN1/CCN2/KLF4/ADORA1/NPNT/MYH11/TNNI2/PTAFR/KCNJ2/TLN1/MYLK/CAMK2G/ITGA1/DAPK3/MYOM2/GTF2IRD1/ATP2A1/FBXO32/DMD/CFLAR/ANXA6/STC1/SCN1B/GPD1L/KLF15/TPM2/TMOD4/ABAT/TMOD2/SMAD7/ARHGAP42/SLC6A8/EHD3/PDE5A/PRKCA/GPER1/PLCE1/OXTR/HDAC4/IL6ST/TCAP/SCN3B/PDE4D/CACNA2D1/NOTCH1/FLNA/VIM/F2R/FGF12/TNNT…	76
	BP	GO:0006936	muscle contraction	62/1994	362/18866	8.83431e-05	0.00553233	0.00466648	TMEM38A/AGT/STAC/MYOM1/ADRB2/CACNA1D/ACE2/GJC1/ATP2B4/EDN1/CALCRL/TPM4/PDE4B/VEGFB/SSPN/BIN1/CCN2/ADORA1/NPNT/MYH11/TNNI2/PTAFR/KCNJ2/TLN1/MYLK/ITGA1/DAPK3/MYOM2/ATP2A1/DMD/ANXA6/STC1/SCN1B/GPD1L/TPM2/TMOD4/ABAT/TMOD2/SMAD7/ARHGAP42/SLC6A8/EHD3/PDE5A/GPER1/PLCE1/OXTR/HDAC4/TCAP/SCN3B/PDE4D/CACNA2D1/FLNA/VIM/F2R/FGF12/TNNT2/RGS2/UTRN/MYL9/TNNC1/CHRNA3/NPPA	62
	BP	GO:0051047	positive regulation of secretion	59/1994	340/18866	8.92636e-05	0.00554975	0.00468118	AGT/NTSR1/MYOM1/CACNA1D/HIF1A/NKX3-1/BAIAP3/LRP1/EDN1/PTGER4/PINK1/SMAD4/TGFB2/ABCG1/ATP13A2/NMB/ADORA1/INHBB/SYT1/EZR/PTAFR/ILDR1/ADAM8/ADAM9/RAB8B/GLUL/PDX1/AACS/TCF7L2/HYAL3/TGFB3/MYB/TNFRSF11A/PHPT1/CADM1/RAB3A/HLA-DRB1/ABAT/RAB15/SYTL2/RGCC/VAMP7/STX1A/EXPH5/STXBP1/GPER1/ISL1/PFKFB2/SOX4/OXTR/SMPD3/UNC13A/INHA/ACHE/SYT7/ITGB2/SCIN/TLR4/NPPA	59
	BP	GO:0003014	renal system process	28/1994	125/18866	9.12148e-05	0.00563056	0.00474934	AGT/GAS6/AQP3/CLDN4/EDN1/SLC4A5/PCSK5/EMP2/ADORA1/ADCY4/ADCY5/ADCY9/MAGED2/ADCY3/WNK4/HNF1A/STC1/PDGFB/AKR1C3/PRKACB/PRKAR2B/BMP4/HYAL2/MCAM/TBC1D8B/KLHL3/F2R/CHRNA3	28
	BP	GO:0016331	morphogenesis of embryonic epithelium	32/1994	151/18866	9.28952e-05	0.00569362	0.00480253	ALDH1A2/GATA3/ALDH1A3/HIF1A/FOLR1/PAX8/TFAP2A/TGFB2/GRHL2/LUZP1/JAG2/SIX4/PDX1/WNT7B/TBX18/RDH10/PLXNB2/SHROOM3/DLC1/WNT4/IFT172/SKI/FZD3/PRKACB/BMP4/SEMA4C/FZD2/SOX4/SALL4/LAMA5/GLI2/TEAD2	32
	BP	GO:0030278	regulation of ossification	41/1994	212/18866	9.55232e-05	0.00578575	0.00488024	ADRB2/CCN1/ATF4/CSF1/BMP2/HIF1A/TFAP2A/PTGER4/IFITM1/TGFB2/NPNT/TMEM64/PBX1/TOB1/BMP2K/CEBPB/FAM20C/RUNX2/ECM1/WNT7B/DKK1/BMPR1B/CDK6/SMURF1/ADGRV1/TGFB3/WNT4/SKI/LTBP3/SMAD7/ACVR2B/BMP4/AXIN2/HDAC4/IL6ST/ALOX5/SMOC1/NOTCH1/EGR2/ENPP1/LRP3	41
	BP	GO:0017156	calcium-ion regulated exocytosis	18/1994	65/18866	9.57426e-05	0.00578575	0.00488024	BAIAP3/SYT13/SYT1/TRPV6/HYAL3/SYT17/RAB3A/SYT8/VAMP7/STX1A/STXBP1/UNC13A/SYT12/NOTCH1/SYT7/SCIN/RIMS3/TRIM9	18
	BP	GO:0050803	regulation of synapse structure or activity	45/1994	240/18866	9.64068e-05	0.00578575	0.00488024	ARHGAP44/NRCAM/DNM3/SLC7A11/AMIGO2/EFNA5/BAIAP2/WNT7A/SRPX2/BDNF/DNM1/ABHD17C/LRP8/PTPRS/EPHB3/CLSTN3/SEMA3F/VSTM5/SLITRK6/SIX4/AGRN/GPC4/NTRK2/KALRN/NLGN3/CAPRIN2/DKK1/DAB2IP/NFATC4/MX1/SEMA4A/EGLN1/DLG5/EFNA1/FYN/DBN1/SYNGAP1/EPHA4/NRP2/NGEF/OXTR/TUBA1A/ADGRB2/MX2/LRFN4	45
	BP	GO:0060485	mesenchyme development	52/1994	290/18866	9.72878e-05	0.00579835	0.00489088	ALDH1A2/GATA3/BMP2/HIF1A/FOLR1/S100A4/SEMA4B/FN1/EDN1/SMAD4/HMGA2/TGFB2/FOXA1/AKNA/ERBB3/ADAM15/SEMA3F/SIX4/VASN/SEMA3A/ENG/TGFBR1/DAB2IP/TCF7L2/RDH10/SEMA4A/ANXA6/SEMA4G/TGFB3/PHLDB2/ROBO1/DLG5/EFNA1/WNT4/PKD2/SMAD7/SEMA3B/BMP4/RGCC/SEMA4C/BCL9L/AXIN2/GLIPR2/NRP2/ISL1/SEMA7A/SEMA4F/DAB2/NOTCH1/LAMA5/KBTBD8/TEAD2	52
	BP	GO:0001101	response to acid chemical	29/1994	132/18866	9.95448e-05	0.00588136	0.00496089	ASS1/ASNS/GLRB/ATP2B4/BCL2L1/RRAGD/PDGFD/BAIAP2/EDN1/COL6A1/CCN2/CDKN1B/KRT8/VEGFA/RRAGB/CRLS1/COL18A1/PDX1/NTRK2/CEBPB/SESN3/GCLC/PKD2/FYN/NSMF/CPS1/CPEB3/ICAM1/COL5A2	29
	BP	GO:0032963	collagen metabolic process	26/1994	113/18866	0.000100317	0.00588136	0.00496089	MMP1/MMP7/PPARG/HIF1A/MMP24/CCN2/ADAM15/GOT1/CTSL/PEPD/ENG/ARRB2/EMILIN1/TGFB3/MYB/P3H1/WNT4/BMP4/RGCC/ITGB1/KLK6/SMPD3/CREB3L1/VIM/F2R/CTSS	26
	BP	GO:1904062	regulation of cation transmembrane transport	60/1994	349/18866	0.000102217	0.00588136	0.00496089	TMEM38A/AGT/NTSR1/FXYD5/STAC/PLCG2/ADRB2/CACNA1D/ACE2/ATP2B4/PDE4B/CNIH2/CRACR2A/PINK1/BIN1/SLC43A1/FGF11/SLC6A9/UBASH3B/NETO2/KCNJ2/HSPA2/GNB5/SLC43A2/NLGN3/DAPK1/ATP2A1/CACNG4/MYO5A/DMD/TLR9/WNK4/SLC31A2/SCN1B/GPD1L/PKD2/FYN/WNK2/GPR35/S100A1/ITGB1/EHD3/KCNAB2/CACNB1/GPER1/SCN3B/PDE4D/CACNA2D1/FLNA/TRPC1/F2R/FGF12/ATP1B3/RGS2/CTSS/UTRN/AKAP6/CEMIP/NPPA/CACNB4	60
	BP	GO:0006692	prostanoid metabolic process	15/1994	49/18866	0.000104568	0.00588136	0.00496089	EDN1/CD74/FABP5/AKR1C4/GSTA1/TBXAS1/ACOX1/AKR1C3/PLA2G4A/PTGES/PTGS1/SIRT1/PLA2G4F/GSTM1/CYP2S1	15
	BP	GO:0006693	prostaglandin metabolic process	15/1994	49/18866	0.000104568	0.00588136	0.00496089	EDN1/CD74/FABP5/AKR1C4/GSTA1/TBXAS1/ACOX1/AKR1C3/PLA2G4A/PTGES/PTGS1/SIRT1/PLA2G4F/GSTM1/CYP2S1	15
	BP	GO:0010712	regulation of collagen metabolic process	15/1994	49/18866	0.000104568	0.00588136	0.00496089	PPARG/CCN2/GOT1/ENG/ARRB2/EMILIN1/TGFB3/MYB/WNT4/BMP4/RGCC/ITGB1/CREB3L1/VIM/F2R	15
	BP	GO:0009306	protein secretion	75/1994	462/18866	0.000104801	0.00588136	0.00496089	AGT/MYOM1/CACNA1D/PTPRN2/CAVIN1/HIF1A/BAIAP3/EFNA5/LRP1/PTGER4/KLF7/PCSK5/ICA1/TGFB2/ABCG1/ATP13A2/INHBB/NR1H3/EZR/ADCY5/NR1D1/CPT1A/ADAM8/ADAM9/RAB8B/CAMK2G/SLC9B2/GLUL/PDX1/AACS/BTN2A2/RAB11FIP3/TMEM106A/TCF7L2/MYO5A/TLR9/TGFB3/P3H1/HNF1A/ITPR2/LTBP2/PHPT1/CADM1/RAB3A/HLA-DRB1/RAPGEF3/MIDN/ABAT/BTN3A1/RAB15/ACVR2B/STXBP4/ITPR1/RGCC/RSAD2/MIR93/STX1A/RAB3B/PRKCA/EXPH5/GPER1/ISL1/PFKFB2/SOX4/ALOX…	75
	BP	GO:0031346	positive regulation of cell projection organization	66/1994	394/18866	0.000105144	0.00588136	0.00496089	AGT/WNT3/VIL1/ZMYND10/DNM3/EFNA5/LRP1/TRIM67/PAK1/FN1/BAIAP2/BDNF/MAPT/OCLN/VEGFA/LRP8/SKIL/SYT1/PLXNA2/NCK1/RAB8B/ANKRD27/AGRN/NTRK2/KALRN/PLXNB3/MAP2K1/CAPRIN2/FBXW8/TGFBR1/DAB2IP/ESPN/EPS8L3/TWF2/SMURF1/CFLAR/PROM2/SYT17/TGFB3/P3H1/PLXNB2/ROBO1/DLG5/SCN1B/NDRG4/FYN/PPP2R5B/MAP1B/CDC42EP5/DBN1/MAGI2/VAMP7/OBSL1/EPHA4/CPEB3/MACF1/PLCE1/SEMA7A/HDAC4/RNF157/UNC13A/CROCC/SCARF1/RGS2/L1CAM/RND2	66
	BP	GO:0050769	positive regulation of neurogenesis	78/1994	485/18866	0.000105295	0.00588136	0.00496089	AGT/PAX6/WNT3/PPARG/CSF1/BMP2/NRCAM/HIF1A/EFNA5/LRP1/TRIM67/PAK1/FN1/BAIAP2/BDNF/BIN1/MAPT/TIMP2/VEGFA/LRP8/FOXA1/SKIL/SYT1/PLXNA2/NCK1/PROX1/ANKRD27/NTRK2/KALRN/PLXNB3/MAP2K1/SEMA3A/DUOXA1/CDON/CAPRIN2/DKK1/FBXW8/DAB2IP/TWF2/SMURF1/CFLAR/SYT17/MYB/P3H1/PLXNB2/ROBO1/DLG5/SCN1B/NDRG4/FZD3/GPRC5B/FYN/PPP2R5B/NSMF/MAP1B/BMP4/DBN1/MAGI2/VAMP7/TP73/OBSL1/EPHA4/CPEB3/MACF1/GPER1/SEMA7A/RNF157/IL6ST/UNC…	78
	BP	GO:0042594	response to starvation	40/1994	206/18866	0.000105486	0.00588136	0.00496089	GAS6/GNPAT/PCK2/PPARG/ATF4/ASNS/DDIT3/RRAGD/MARS1/UPP1/TBL2/SZT2/RRAGB/ZFYVE1/INHBB/UGT1A1/EIF2A/DNAJC15/ATF3/GLUL/FADS1/AACS/FOXA3/SESN3/WNT4/AKR1C3/AOC1/TFEB/LAMP2/CPS1/EIF4EBP1/SIK1/ELAPOR1/PRKAA2/SIRT1/FNIP1/RNF152/PMAIP1/NUAK2/SLC39A5	40
	BP	GO:1990138	neuron projection extension	35/1994	172/18866	0.000106303	0.00588893	0.00496728	WNT3/NRCAM/LRP1/SEMA4B/PAK1/FN1/BDNF/MAPT/VEGFA/SYT1/PTPRS/SEMA3F/ARHGAP4/NLGN3/SEMA3A/SEMA4A/TWF2/SMURF1/KIAA0319/SYT17/SEMA4G/MAP1B/SEMA3B/DBN1/SEMA4C/ITGB1/NRP2/MACF1/SEMA7A/SEMA4F/RNF157/UNC13A/PAK6/L1CAM/TRIM46	35
	BP	GO:0071692	protein localization to extracellular region	76/1994	470/18866	0.000107531	0.00591899	0.00499263	AGT/MYOM1/CACNA1D/PTPRN2/CAVIN1/HIF1A/BAIAP3/EFNA5/LRP1/PTGER4/KLF7/PCSK5/ICA1/TGFB2/ABCG1/ATP13A2/INHBB/NR1H3/EZR/ADCY5/NR1D1/CPT1A/ADAM8/ADAM9/RAB8B/CAMK2G/SLC9B2/GLUL/PDX1/AACS/BTN2A2/RAB11FIP3/TMEM106A/TCF7L2/MYO5A/TLR9/TGFB3/P3H1/HNF1A/ITPR2/LTBP2/PHPT1/CADM1/RAB3A/HLA-DRB1/RAPGEF3/MIDN/ABAT/BTN3A1/RAB15/ACVR2B/STXBP4/ITPR1/RGCC/RSAD2/MIR93/STX1A/RAB3B/PRKCA/EXPH5/GPER1/ISL1/PFKFB2/SOX4/ALOX…	76
	BP	GO:0043270	positive regulation of ion transport	51/1994	284/18866	0.000108673	0.005944	0.00501373	AGT/NTSR1/STAC/PLCG2/ADRB2/CACNA1D/ATF4/ACE2/EDN1/ABCA7/CRACR2A/PINK1/ADORA1/SYT1/PTAFR/KCNJ2/HSPA2/MYLK/CEBPB/NLGN3/ARRB2/ATP2A1/CACNG4/DMD/WNK4/STC1/TNFRSF11A/PDGFB/SCN1B/GPD1L/PKD2/ABAT/WNK2/VAMP7/S100A1/ITGB1/EHD3/RAB3B/STXBP1/GPER1/SCN3B/CACNA2D1/FLNA/TRPC1/F2R/FGF12/ATP1B3/CTSS/AKAP6/CEMIP/NPPA	51
	BP	GO:0007389	pattern specification process	74/1994	455/18866	0.000109486	0.00595079	0.00501946	BICC1/ALDH1A2/PAX6/WNT3/HOXB3/PCSK6/BHLHE41/BMP2/DDIT3/SIM2/HIF1A/FOLR1/PAX8/NKX3-1/EDN1/WNT7A/BHLHE40/PCSK5/SMAD4/C3/GDF11/DZIP1L/FOXA1/PLXNA2/NR2F2/DNAH11/PBX1/MEIS2/SEMA3F/TBX6/RPGRIP1L/GALNT11/MEIS1/WNT7B/DYNC2H1/SEMA3A/CDON/DKK1/TBX18/ENG/TGFBR1/BMPR1B/CELSR2/SENP2/MFNG/STC1/ADGRG1/SHROOM3/ROBO1/NDRG4/IFT172/HIPK2/SKI/SATB2/PRKACB/PKD2/ETS2/ACVR2B/BMP4/LFNG/BBS7/CYP26B1/AXIN2/SYNGAP1/NRP2/IS…	74
	BP	GO:0014033	neural crest cell differentiation	22/1994	89/18866	0.000110194	0.00595187	0.00502036	ALDH1A2/HIF1A/FOLR1/SEMA4B/FN1/EDN1/SMAD4/SEMA3F/SEMA3A/RDH10/SEMA4A/ANXA6/SEMA4G/SEMA3B/BMP4/SEMA4C/NRP2/ISL1/SEMA7A/SEMA4F/LAMA5/KBTBD8	22
	BP	GO:0032965	regulation of collagen biosynthetic process	14/1994	44/18866	0.000111018	0.00595914	0.0050265	PPARG/CCN2/GOT1/ENG/ARRB2/EMILIN1/TGFB3/MYB/WNT4/BMP4/RGCC/CREB3L1/VIM/F2R	14
	BP	GO:0035592	establishment of protein localization to extracellular region	75/1994	463/18866	0.000112414	0.00599678	0.00505825	AGT/MYOM1/CACNA1D/PTPRN2/CAVIN1/HIF1A/BAIAP3/EFNA5/LRP1/PTGER4/KLF7/PCSK5/ICA1/TGFB2/ABCG1/ATP13A2/INHBB/NR1H3/EZR/ADCY5/NR1D1/CPT1A/ADAM8/ADAM9/RAB8B/CAMK2G/SLC9B2/GLUL/PDX1/AACS/BTN2A2/RAB11FIP3/TMEM106A/TCF7L2/MYO5A/TLR9/TGFB3/P3H1/HNF1A/ITPR2/LTBP2/PHPT1/CADM1/RAB3A/HLA-DRB1/RAPGEF3/MIDN/ABAT/BTN3A1/RAB15/ACVR2B/STXBP4/ITPR1/RGCC/RSAD2/MIR93/STX1A/RAB3B/PRKCA/EXPH5/GPER1/ISL1/PFKFB2/SOX4/ALOX…	75
	BP	GO:1901654	response to ketone	39/1994	200/18866	0.000116394	0.00617104	0.00520523	ASS1/PCK2/PPARG/CCND1/NKX3-1/BCL2L1/EFNA5/CLDN4/EDN1/PTGER4/THBS1/DUSP1/TGFB2/KLF4/PSPH/NR1H3/ADCY5/TFAP4/PTAFR/ADAM15/AACS/GNAI1/FBXO32/CFLAR/ADCY3/TGFB3/MSN/AKR1C3/CPS1/TRERF1/EIF4EBP1/PRKAA2/OXTR/ICAM1/SIRT1/TNC/NCOA2/DDIT4/FOSB	39
	BP	GO:0006633	fatty acid biosynthetic process	35/1994	173/18866	0.000119953	0.00631677	0.00532816	ACSM3/TRIB3/MGLL/EDN1/FA2H/CYP2E1/NR1H3/SCD/CD74/FADS3/SCD5/FADS1/FABP5/SLC45A3/ACSS1/TBXAS1/MYO5A/LIPH/ACOT7/AKR1C3/ASAH2/PLA2G4A/CYP4F11/PTGES/PTGS1/ELOVL6/PRKAA2/SIRT1/ALOX5/ELOVL7/MLXIPL/EPHX2/PLA2G4F/FADS2/GSTM1	35
	BP	GO:0030048	actin filament-based movement	32/1994	153/18866	0.000120605	0.00631677	0.00532816	VIL1/CACNA1D/GJC1/SUN2/TPM4/PDE4B/BIN1/WIPF1/EMP2/ADORA1/TNNI2/KCNJ2/MYO7A/ATP2A1/MYO5A/MYO15A/DMD/STC1/SCN1B/GPD1L/TPM2/MYO1B/MYO1D/TCAP/SCN3B/PDE4D/CACNA2D1/FLNA/VIM/FGF12/TNNT2/TNNC1	32
	BP	GO:0060048	cardiac muscle contraction	30/1994	140/18866	0.000122927	0.0063996	0.00539802	TMEM38A/CACNA1D/ACE2/GJC1/PDE4B/VEGFB/BIN1/CCN2/ADORA1/TNNI2/KCNJ2/ATP2A1/DMD/STC1/SCN1B/GPD1L/SMAD7/EHD3/PDE5A/HDAC4/TCAP/SCN3B/PDE4D/CACNA2D1/FLNA/FGF12/TNNT2/RGS2/TNNC1/NPPA	30
	BP	GO:0007015	actin filament organization	71/1994	434/18866	0.000124575	0.00644659	0.00543766	LCP1/SYNPO/VIL1/FAM171A1/IQANK1/ESAM/PAK1/BAIAP2/TPM4/PTGER4/BIN1/FHOD3/WIPF1/EMP2/CCN2/HAX1/ARHGEF10L/BAIAP2L2/ARPC1A/USH1C/RHOBTB1/SPIRE2/EZR/NCK1/TNFAIP1/PROX1/NF2/SHROOM2/MYO7A/SPTB/ARHGEF18/TGFBR1/ESPN/MYO5A/MYO15A/TWF2/TGFB3/PHLDB2/SHROOM3/PPARGC1B/DLC1/WNT4/EVL/RAPGEF3/TPM2/TMOD4/GAS7/TMOD2/WASF3/MYO1B/MYO1D/CDC42EP5/DBN1/ACTN1/RGCC/FAT1/BCAR1/ARPIN/CAP2/GMFB/ICAM1/FSCN2/TCAP/CRACD/FLNA/AI…	71
	BP	GO:0061035	regulation of cartilage development	19/1994	72/18866	0.000125701	0.00644951	0.00544012	FGF18/CCN1/BMP2/EFEMP1/CCN2/BMP1/RUNX2/TGFBR1/BMPR1B/SOX6/LTBP3/SMAD7/BMP4/AXIN2/SMPD3/GLI2/ADAMTS7/SCIN/RARB	19
	BP	GO:0061138	morphogenesis of a branching epithelium	37/1994	187/18866	0.000126124	0.00644951	0.00544012	PGF/AGT/TGM2/CSF1/BMP2/PAX8/NKX3-1/SOCS3/PAK1/EDN1/RASIP1/SMAD4/VEGFA/GRHL2/FOXA1/NPNT/PROX1/PBX1/EPHA2/BTRC/SIX4/ESRP2/SEMA3A/ENG/NFATC4/RDH10/NTN4/DLG5/CTSH/WNT4/PKD2/BMP4/TNC/TBX3/NOTCH1/LAMA5/GLI2	37
	BP	GO:0051403	stress-activated MAPK cascade	51/1994	286/18866	0.000130297	0.0065897	0.00555837	AGT/IRAK2/BMP2/MECOM/PAK1/EDN1/WNT7A/CYLD/PTGER4/MAPK11/PINK1/QARS1/SIRPA/DUSP1/CCN2/TGFB2/VEGFA/EZR/IGF1R/XDH/BTRC/CARD9/EMC10/WNT7B/MAP2K1/SEMA3A/DKK1/DAB2IP/TLR9/TRIB1/MAP4K4/TNFRSF11A/MAP3K9/NOD1/HIPK2/UNC5CL/ANKRD6/CDC42EP5/MTURN/TRAF1/SEMA4C/EPHA4/GADD45A/MAPK8IP1/MLKL/FOXM1/MAP3K8/MAP3K10/DUSP10/TLR4/NPPA	51
	BP	GO:0050708	regulation of protein secretion	60/1994	352/18866	0.000130391	0.0065897	0.00555837	MYOM1/CACNA1D/HIF1A/BAIAP3/EFNA5/LRP1/PTGER4/KLF7/ICA1/TGFB2/ABCG1/ATP13A2/INHBB/NR1H3/EZR/ADCY5/NR1D1/CPT1A/ADAM8/ADAM9/SLC9B2/GLUL/PDX1/AACS/BTN2A2/RAB11FIP3/TCF7L2/TLR9/TGFB3/P3H1/ITPR2/PHPT1/CADM1/HLA-DRB1/RAPGEF3/MIDN/ABAT/STXBP4/ITPR1/RGCC/RSAD2/MIR93/STX1A/PRKCA/EXPH5/GPER1/ISL1/PFKFB2/SOX4/ALOX5/SIRT4/PER2/ACVR1C/ACHE/BMP8A/SYT7/F2R/CCN3/CACNA2D2/TLR4	60
	BP	GO:0010718	positive regulation of epithelial to mesenchymal transition	15/1994	50/18866	0.000134917	0.00670693	0.00565725	BMP2/SMAD4/TGFB2/ENG/TGFBR1/TCF7L2/TGFB3/BMP4/RGCC/BCL9L/AXIN2/GLIPR2/ISL1/DAB2/NOTCH1	15
	BP	GO:0003205	cardiac chamber development	35/1994	174/18866	0.000135162	0.00670693	0.00565725	GATA3/CCN1/HIF1A/PAX8/PCSK5/SMAD4/TGFB2/HEG1/GRHL2/PROX1/DNAH11/LUZP1/ZFPM1/NDST1/TBX6/ENG/TGFBR1/PRDM1/EGLN1/CPLANE1/ROBO1/SMAD7/ADAMTS1/BMP4/NRP2/FZD2/ISL1/SOX4/TBX3/SALL4/STRA6/NOTCH1/TNNT2/RARB/TNNC1	35
	BP	GO:0001558	regulation of cell growth	69/1994	420/18866	0.000135519	0.00670693	0.00565725	AGT/WNT3/PPARG/CDA/NRCAM/IGFBP4/EFNA5/LRP1/SEMA4B/FBLN5/PAK1/FN1/EDN1/BDNF/SMAD4/MAPT/EXTL3/TGFB2/CDKN1B/VEGFA/SYT1/PTPRS/ADAM15/IGFBP3/CLSTN3/SEMA3F/ARHGAP4/SEMA3A/KAZALD1/CAPRIN2/TGFBR1/SEMA4A/TWF2/SMURF1/KIAA0319/SYT17/SEMA4G/FAM122A/SMAD7/DCBLD2/MAP1B/SEMA3B/DBN1/HYAL2/HYAL1/SEMA4C/PSRC1/BCAR1/JADE1/MACF1/CDKN2C/PTPRJ/EAF2/PLCE1/SEMA7A/SEMA4F/RNF157/SIRT1/KRT17/UNC13A/TMC8/CCN3/RGS2/L1CAM/ENP…	69
	BP	GO:0010977	negative regulation of neuron projection development	32/1994	154/18866	0.00013707	0.00670693	0.00565725	WNT3/DNM3/LRP1/SEMA4B/PLK2/PTPRS/B2M/PMP22/SEMA3F/TBX6/ARHGAP4/PAQR3/NLGN3/SEMA3A/DKK1/NFATC4/SEMA4A/MYLIP/KIAA0319/SEMA4G/EFNA1/SEMA3B/SEMA4C/SYNGAP1/EPHA4/LGALS1/NGEF/SEMA7A/SEMA4F/VIM/PTPRG/TRIM46	32
	BP	GO:0030323	respiratory tube development	36/1994	181/18866	0.000138583	0.00670693	0.00565725	ALDH1A2/FGF18/SIM2/SLC7A11/PCSK5/CCN2/HEG1/AIMP2/VEGFA/GRHL2/FOXA1/PROX1/PHF14/ESRP2/WNT7B/MAP2K1/SPDEF/RDH10/FSTL3/HS6ST1/TGFB3/DLG5/CTSH/RAB3A/LTBP3/ACVR2B/BMP4/EIF4EBP1/RC3H2/SMPD3/PHEX/TNC/STRA6/NOTCH1/LAMA5/GLI2	36
	BP	GO:0048736	appendage development	36/1994	181/18866	0.000138583	0.00670693	0.00565725	ALDH1A2/WNT3/SLC7A11/FRAS1/TFAP2A/WNT7A/ZNRF3/PCSK5/SMAD4/TGFB2/GRHL2/PLXNA2/NR2F2/PBX1/RPGRIP1L/RUNX2/DYNC2H1/DKK1/RDH10/BMPR1B/CPLANE1/IFT172/SKI/PITX1/BMP4/BBS7/CYP26B1/RC3H2/SOX4/BCL2L11/TBX3/SALL4/SMOC1/NOTCH1/GLI2/RARB	36
	BP	GO:0060173	limb development	36/1994	181/18866	0.000138583	0.00670693	0.00565725	ALDH1A2/WNT3/SLC7A11/FRAS1/TFAP2A/WNT7A/ZNRF3/PCSK5/SMAD4/TGFB2/GRHL2/PLXNA2/NR2F2/PBX1/RPGRIP1L/RUNX2/DYNC2H1/DKK1/RDH10/BMPR1B/CPLANE1/IFT172/SKI/PITX1/BMP4/BBS7/CYP26B1/RC3H2/SOX4/BCL2L11/TBX3/SALL4/SMOC1/NOTCH1/GLI2/RARB	36
	BP	GO:0010958	regulation of amino acid import across plasma membrane	7/1994	13/18866	0.000140529	0.00670693	0.00565725	AGT/ACE2/SLC43A1/SLC43A2/ITGB1/PER2/RGS2	7
	BP	GO:0032530	regulation of microvillus organization	7/1994	13/18866	0.000140529	0.00670693	0.00565725	VIL1/USH1C/PODXL/EZR/RAP1GAP/TWF2/CDHR5	7
	BP	GO:1903789	regulation of amino acid transmembrane transport	7/1994	13/18866	0.000140529	0.00670693	0.00565725	AGT/ACE2/SLC43A1/SLC43A2/ITGB1/PER2/RGS2	7
	BP	GO:0048568	embryonic organ development	73/1994	451/18866	0.000141247	0.00670693	0.00565725	ALDH1A2/PAX6/GATA3/HOXB3/CCN1/ATF4/CXCL8/ALDH1A3/HIF1A/FOLR1/PAX8/SOCS3/TFAP2A/EFEMP1/EDN1/PCSK5/TGFB2/KRT8/VEGFA/GRHL2/USH1C/NR2F2/PROX1/PBX1/EPHA2/ZFPM1/SLITRK6/NDST1/SIX4/MYO7A/TBX6/CEBPB/RUNX2/WNT7B/MAP2K1/FBXW8/ENG/TGFBR1/RDH10/MYO15A/PDZD7/HS6ST1/PRDM1/TGFB3/EGLN1/SENP2/PDGFB/RBPMS2/EFNA1/NDRG4/IFT172/HIPK2/FZD3/SATB2/PKD2/TFEB/BMP4/MBD3/BBS7/HYAL1/FZD2/TCAP/LRIG1/TBX3/STRA6/NOTCH1/OTX1/GLI…	73
	BP	GO:1901890	positive regulation of cell junction assembly	24/1994	103/18866	0.000148472	0.00701147	0.00591413	AGT/ACE2/AMIGO2/EFNA5/WNT7A/SRPX2/BDNF/VEGFA/EPHB3/EPHA2/CLSTN3/VSTM5/SLITRK6/AGRN/NTRK2/NLGN3/SEMA4A/MAP4K4/DLG5/WNT4/CLDN3/PTPRJ/OXTR/ADGRB2	24
	BP	GO:1901655	cellular response to ketone	23/1994	97/18866	0.000153111	0.00719124	0.00606576	ASS1/PCK2/PPARG/EFNA5/PTGER4/KLF4/ADCY5/TFAP4/ADAM15/AACS/GNAI1/FBXO32/CFLAR/ADCY3/MSN/AKR1C3/TRERF1/EIF4EBP1/PRKAA2/ICAM1/SIRT1/TNC/DDIT4	23
	BP	GO:0043010	camera-type eye development	57/1994	332/18866	0.000156061	0.00729016	0.0061492	ALDH1A2/PAX6/GATA3/MYOM1/TSKU/ATF4/ALDH1A3/SLC7A11/ATP2B4/HIF1A/TFAP2A/EFEMP1/WNT7A/SLC4A5/PTPRM/TTLL5/GDF11/TGFB2/KLF4/CDKN1B/VEGFA/TDRD7/GRHL2/SKIL/USH1C/PROX1/EPHA2/MITF/BCAR3/NF2/SHROOM2/SLITRK6/RPGRIP1L/NTRK2/MEIS1/MYOM2/WNT7B/CDON/TGFBR1/RDH10/BMPR1B/TUB/IFT172/HIPK2/SKI/ACVR2B/BMP4/FAT1/OBSL1/HSF4/GPD2/NHS/STRA6/ACHE/VIM/FBN1/DLL1	57
	BP	GO:0110110	positive regulation of animal organ morphogenesis	21/1994	85/18866	0.000157732	0.00732858	0.00618161	AGT/GATA3/CSF1/BMP2/PAX8/PIM1/TFAP2A/EDN1/SMAD4/TGFB2/VEGFA/SIX4/DKK1/ENG/TGFBR1/TNFAIP3/CFLAR/ROBO1/WNT4/BMP4/NOTCH1	21
	BP	GO:0072073	kidney epithelium development	30/1994	142/18866	0.000160557	0.00736409	0.00621157	KIF26B/PGF/AGT/GATA3/BMP2/PAX8/BDNF/SMAD4/GDF11/VEGFA/NPNT/PODXL/PBX1/SIX4/KANK2/WNT7B/WNK4/WNT4/KLF15/PKD2/SMAD7/BMP4/MAGI2/EPHA4/KLHL3/NOTCH1/LAMA5/CRLF1/RARB/DLL1	30
	BP	GO:0070371	ERK1 and ERK2 cascade	56/1994	325/18866	0.000161058	0.00736409	0.00621157	AGT/TIMP3/GAS6/PSCA/FGF18/CCN1/BMP2/PKHD1/LRP1/PDGFD/FN1/ABCA7/PTGER4/NDRG2/SMAD4/SIRPA/DUSP1/CCN2/KLF4/DENND2B/NPNT/EZR/EPHA2/ATF3/CD74/FGFR3/RPS6KA6/BTN2A2/CCL20/GAREM1/MAP2K1/ARRB2/DAB2IP/CFLAR/EMILIN1/TNFRSF11A/PDGFB/CTSH/NDRG4/NOD1/HLA-DRB1/WNK2/MTURN/APIP/BMP4/GLIPR2/PRKCA/GPER1/OXTR/ICAM1/SEMA7A/NOTCH1/DUSP10/F2R/TLR4/AKAP12	56
	BP	GO:1903844	regulation of cellular response to transforming growth factor beta stimulus	28/1994	129/18866	0.00016189	0.00736409	0.00621157	ONECUT2/PRDM16/FOLR1/SMAD4/THBS1/SKIL/NPNT/GOT1/LRG1/VASN/ENG/TGFBR1/SMURF1/CFLAR/EMILIN1/TGFB3/FERMT1/HIPK2/SKI/ING2/VEPH1/SMAD7/CAV2/BCL9L/SIRT1/DAB2/WFIKKN1/FBN1	28
	BP	GO:0043583	ear development	42/1994	224/18866	0.000161904	0.00736409	0.00621157	LGR5/GATA3/BMP2/ALDH1A3/PAX8/TFAP2A/EDN1/ESRP1/BDNF/TGFB2/IFT88/CDKN1B/USH1C/PROX1/JAG2/SHROOM2/MYCL/SLITRK6/SIX4/MYO7A/RPGRIP1L/MCM2/RDH10/MYO15A/PDZD7/ADGRV1/TGFB3/FZD3/BMP4/EPHA4/FZD2/GABRB3/SLC4A7/BCL2L11/TCAP/LRIG1/STRA6/NOTCH1/OTX1/GLI2/KCNQ4/DLL1	42
	BP	GO:0060393	regulation of pathway-restricted SMAD protein phosphorylation	17/1994	62/18866	0.000169475	0.00766808	0.00646798	BMP2/SMAD4/GDF11/TGFB2/INHBB/DKK1/ENG/TGFBR1/EMILIN1/TGFB3/SMAD7/BMP8B/BMP4/DAB2/INHA/INHBE/BMP8A	17
	BP	GO:0010634	positive regulation of epithelial cell migration	35/1994	176/18866	0.000170883	0.00769152	0.00648775	AGT/GATA3/PLCG2/FGF18/VIL1/HMOX1/HIF1A/EDN1/WNT7A/SRPX2/MAPRE2/ANXA3/THBS1/TGFB2/VEGFA/PLK2/PROX1/SP1/ADAM9/EPB41L4B/EMC10/INSL3/MAP4K4/PDGFB/CTSH/BMP4/HYAL1/BCAR1/JCAD/GLIPR2/NRP2/PRKCA/ETS1/SIRT1/FUT1	35
	BP	GO:0045665	negative regulation of neuron differentiation	42/1994	225/18866	0.000179111	0.00801197	0.00675805	PAX6/WNT3/DNM3/NOTCH3/LRP1/SEMA4B/GDF11/PLK2/PTPRS/B2M/PBX1/PMP22/SEMA3F/TBX6/ARHGAP4/PAQR3/MEIS1/NLGN3/SEMA3A/DKK1/NFATC4/SEMA4A/MYLIP/KIAA0319/SEMA4G/FUOM/EFNA1/SEMA3B/SEMA4C/TP73/SYNGAP1/EPHA4/LGALS1/NGEF/ISL1/SEMA7A/SEMA4F/NOTCH1/VIM/PTPRG/TRIM46/DLL1	42
	BP	GO:0051148	negative regulation of muscle cell differentiation	18/1994	68/18866	0.000179857	0.00801197	0.00675805	CEACAM5/NFATC1/BHLHE41/BMP2/HDAC5/PAK1/BDNF/SMAD4/DKK1/CFLAR/PDGFB/SOX6/RBPMS2/HDAC4/NOTCH1/CCN3/RGS2/DLL1	18
	BP	GO:0072006	nephron development	30/1994	143/18866	0.000182983	0.00808299	0.00681795	KIF26B/PGF/AGT/GATA3/BMP2/PAX8/NOTCH3/PDGFD/SMAD4/VEGFA/NPNT/PODXL/PBX1/SIX4/WNT7B/CFLAR/WNK4/PDGFB/WNT4/COL4A4/KLF15/PKD2/BMP4/MAGI2/KLHL3/PLCE1/COL4A3/NOTCH1/LAMA5/DLL1	30
	BP	GO:0048843	negative regulation of axon extension involved in axon guidance	10/1994	26/18866	0.000183322	0.00808299	0.00681795	WNT3/SEMA4B/SEMA3F/SEMA3A/SEMA4A/SEMA4G/SEMA3B/SEMA4C/SEMA7A/SEMA4F	10
	BP	GO:0010976	positive regulation of neuron projection development	51/1994	290/18866	0.00018565	0.00814408	0.00686948	AGT/WNT3/EFNA5/LRP1/TRIM67/PAK1/FN1/BAIAP2/BDNF/MAPT/VEGFA/LRP8/SKIL/SYT1/PLXNA2/NCK1/ANKRD27/NTRK2/KALRN/PLXNB3/MAP2K1/CAPRIN2/FBXW8/DAB2IP/TWF2/SMURF1/CFLAR/SYT17/P3H1/PLXNB2/ROBO1/DLG5/SCN1B/NDRG4/FYN/PPP2R5B/MAP1B/DBN1/MAGI2/VAMP7/OBSL1/EPHA4/CPEB3/MACF1/SEMA7A/RNF157/UNC13A/SCARF1/RGS2/L1CAM/RND2	51
	BP	GO:0009791	post-embryonic development	21/1994	86/18866	0.000188189	0.0082138	0.00692829	GATA3/SCUBE1/ALDH5A1/EFEMP1/PLAGL2/SZT2/KLF4/HEG1/VEGFA/MYO7A/TGFBR1/PRDM1/SOX6/RAB3A/ACVR2B/ITPR1/BMP4/RC3H2/BCL2L11/ARID5B/FBN1	21
	BP	GO:0030324	lung development	35/1994	177/18866	0.000191742	0.00832683	0.00702363	ALDH1A2/FGF18/SIM2/SLC7A11/CCN2/HEG1/AIMP2/VEGFA/GRHL2/FOXA1/PROX1/PHF14/ESRP2/WNT7B/MAP2K1/SPDEF/RDH10/FSTL3/HS6ST1/TGFB3/DLG5/CTSH/RAB3A/LTBP3/ACVR2B/BMP4/EIF4EBP1/RC3H2/SMPD3/PHEX/TNC/STRA6/NOTCH1/LAMA5/GLI2	35
	BP	GO:0022612	gland morphogenesis	27/1994	124/18866	0.000198884	0.00858382	0.0072404	PAX6/TGM2/CSF1/POLB/NKX3-1/TGFB2/FOXA1/PROX1/EPHA2/BTRC/ESRP2/CEBPB/SEMA3A/CRIP1/TNFAIP3/CFLAR/TGFB3/NTN4/MSN/WNT4/BMP4/TNC/TBX3/NOTCH1/LAMA5/GLI2/SERPINB5	27
	BP	GO:0045666	positive regulation of neuron differentiation	63/1994	380/18866	0.000200622	0.00858382	0.0072404	AGT/WNT3/BMP2/NRCAM/EFNA5/LRP1/TRIM67/PAK1/FN1/BAIAP2/BDNF/MAPT/TIMP2/VEGFA/LRP8/FOXA1/SKIL/SYT1/PLXNA2/NCK1/PROX1/ANKRD27/NTRK2/KALRN/PLXNB3/MAP2K1/DUOXA1/CDON/CAPRIN2/DKK1/FBXW8/DAB2IP/TWF2/SMURF1/CFLAR/SYT17/P3H1/PLXNB2/ROBO1/DLG5/SCN1B/NDRG4/GPRC5B/FYN/PPP2R5B/MAP1B/BMP4/DBN1/MAGI2/VAMP7/OBSL1/EPHA4/CPEB3/MACF1/SEMA7A/RNF157/UNC13A/SCARF1/GLI2/RGS2/L1CAM/RND2/RARB	63
	BP	GO:0030336	negative regulation of cell migration	59/1994	350/18866	0.00020064	0.00858382	0.0072404	DNAJA4/PPARG/HMOX1/CCL28/HDAC5/ATP2B4/RAP2B/LRP1/IL27RA/PTPRM/PTGER4/ADAMTS9/IFITM1/THBS1/DUSP1/KLF4/ADORA1/NR2F2/ARHGDIB/ADAM15/IGFBP3/MITF/CD74/NF2/ARHGAP4/PLXNB3/SEMA3A/ENG/DAB2IP/TRIB1/EMILIN1/PHLDB2/MAPK15/STC1/ADGRG1/ROBO1/DLG5/DLC1/GCSAM/NDRG4/WNT4/EVL/SMAD7/TIMP1/HYAL2/RGCC/MAGI2/CLDN3/GADD45A/MIR93/ARPIN/PTPRJ/NOTCH1/ACVR1C/ADARB1/DUSP10/PTPRG/CCN3/MCC	59
	BP	GO:0015837	amine transport	23/1994	99/18866	0.000211769	0.0090153	0.00760435	AGT/NTSR1/ACE2/SYT13/PINK1/SLC43A1/ADORA1/SYT1/SLC43A2/SYT17/RAB3A/ABAT/SYT8/ITGB1/STX1A/RAB3B/STXBP1/OXTR/PER2/SYT12/SYT7/RGS2/CHRNA3	23
	BP	GO:0003231	cardiac ventricle development	28/1994	131/18866	0.000212938	0.00902063	0.00760885	GATA3/CCN1/HIF1A/PAX8/SMAD4/TGFB2/HEG1/GRHL2/PROX1/LUZP1/ZFPM1/ENG/TGFBR1/PRDM1/EGLN1/CPLANE1/ROBO1/SMAD7/BMP4/FZD2/ISL1/SOX4/TBX3/SALL4/STRA6/NOTCH1/TNNT2/TNNC1	28
	BP	GO:0003179	heart valve morphogenesis	15/1994	52/18866	0.000219158	0.009194	0.00775509	NFATC1/GATA3/CCN1/BMP2/SMAD4/ADAMTS9/TGFB2/ZFPM1/EMILIN1/ROBO1/EFNA1/BMP4/SOX4/STRA6/NOTCH1	15
	BP	GO:0032330	regulation of chondrocyte differentiation	15/1994	52/18866	0.000219158	0.009194	0.00775509	FGF18/EFEMP1/CCN2/RUNX2/TGFBR1/BMPR1B/SOX6/LTBP3/SMAD7/BMP4/AXIN2/GLI2/ADAMTS7/SCIN/RARB	15
	BP	GO:0009064	glutamine family amino acid metabolic process	19/1994	75/18866	0.000224832	0.00937212	0.00790532	ASS1/ADHFE1/PHGDH/ASNS/SLC7A11/ATP2B4/ALDH5A1/PYCR1/DDAH1/GOT1/DDAH2/GLUL/GLUD2/GCLC/ALDH4A1/ASRGL1/ASL/CPS1/SIRT4	19
	BP	GO:0007178	transmembrane receptor protein serine/threonine kinase signaling pathway	60/1994	359/18866	0.000225573	0.00937212	0.00790532	ONECUT2/PCSK6/CCN1/PRDM16/BMP2/FOLR1/SMAD4/THBS1/GDF11/TGFB2/SKIL/NPNT/INHBB/FNTA/GOT1/ADAM9/LRG1/VASN/TOB1/RUNX2/ARHGEF18/DKK1/ELAPOR2/ENG/TGFBR1/ARRB2/BMPR1B/FSTL3/SMURF1/KIAA0319/EMILIN1/TGFB3/LTBP2/RBPMS2/FERMT1/HIPK2/SKI/ING2/VEPH1/LTBP3/SMAD7/ACVR2B/CAV2/BMP8B/BMP4/MAGI2/BCL9L/SIRT1/DAB2/SMPD3/INHA/INHBE/NOTCH1/ACVR1C/VIM/BMP8A/CCN3/WFIKKN1/FBN1/SLC39A5	60
	BP	GO:0048593	camera-type eye morphogenesis	27/1994	125/18866	0.000228548	0.00944298	0.00796509	PAX6/TSKU/ATF4/ALDH1A3/HIF1A/TFAP2A/PTPRM/GDF11/VEGFA/TDRD7/USH1C/PROX1/EPHA2/BCAR3/SHROOM2/RPGRIP1L/NTRK2/MEIS1/CDON/IFT172/HIPK2/SKI/BMP4/FAT1/OBSL1/STRA6/DLL1	27
	BP	GO:0032532	regulation of microvillus length	5/1994	7/18866	0.000229464	0.00944298	0.00796509	VIL1/USH1C/EZR/TWF2/CDHR5	5
	BP	GO:0031098	stress-activated protein kinase signaling cascade	52/1994	300/18866	0.000233422	0.00954181	0.00804846	AGT/IRAK2/BMP2/MECOM/PAK1/EDN1/WNT7A/CYLD/PTGER4/MAPK11/PINK1/QARS1/SIRPA/DUSP1/CCN2/TGFB2/VEGFA/EZR/IGF1R/XDH/BTRC/CARD9/EMC10/WNT7B/MAP2K1/SEMA3A/DKK1/DAB2IP/TLR9/TRIB1/MAP4K4/TNFRSF11A/MAP3K9/NOD1/HIPK2/UNC5CL/ANKRD6/CDC42EP5/MTURN/TRAF1/SEMA4C/EPHA4/GADD45A/MAPK8IP1/MLKL/FOXM1/MAP3K8/MAP3K10/PAK6/DUSP10/TLR4/NPPA	52
	BP	GO:0051098	regulation of binding	61/1994	367/18866	0.000234074	0.00954181	0.00804846	PAX6/TRIB3/GATA3/ADRB2/PPARG/HMOX1/BMP2/DDIT3/EIF3C/HDAC5/NKX3-1/PINX1/LRP1/CEBPG/CYLD/H1-0/BDNF/SMAD4/ZNF462/ZBTB7C/HMGA2/PBXIP1/KLF4/UBASH3B/PLK2/TFAP4/ADAM15/B2M/HJURP/ZFPM1/EIF3D/PDX1/CDON/CAPRIN2/DKK1/TGFBR1/ARRB2/NFATC4/TCF7L2/CDCA5/SENP2/MFNG/PDGFB/HIPK2/SKI/BMP4/LFNG/AURKB/GPSM1/HMGB2/EPHA4/NEK2/ISL1/HDAC4/PLK1/DAB2/PER2/TMC8/ACE/CDT1/WFIKKN1	61
	BP	GO:1904018	positive regulation of vasculature development	43/1994	235/18866	0.000238259	0.00966684	0.00815392	PGF/ADM2/FGF18/HMOX1/CXCL8/HIF1A/PDGFD/SRPX2/CTH/VEGFB/ANXA3/HMGA2/C3/THBS1/KLF4/VEGFA/DDAH1/PLK2/ITGA5/SP1/LRG1/EMC10/ECM1/ENG/CFLAR/PDGFB/CTSH/HIPK2/RAPGEF3/HYAL1/S100A1/ITGB1/JCAD/PRKCA/GPER1/ISL1/ETS1/SIRT1/FUT1/NOTCH1/ITGB2/ITGB8/DLL1	43
	BP	GO:0042692	muscle cell differentiation	64/1994	390/18866	0.000240208	0.00970035	0.00818218	CEACAM5/NFATC1/AGT/BHLHE41/BMP2/HDAC5/SYNE1/PAK1/EDN1/CTH/BDNF/MAPK11/SMAD4/BIN1/FHOD3/KRT8/VEGFA/NPNT/MYH11/PROX1/MYORG/SIX4/XK/SGCB/CD81/CDON/DKK1/ENG/ARRB2/NFATC4/DMD/CFLAR/PDGFB/SOX6/RBPMS2/WNT4/ALPK3/SKI/TMOD4/TMOD2/CAV2/BMP4/SEMA4C/CYP26B1/ITGB1/OBSL1/SIK1/MYEF2/GPER1/HDAC4/SIRT1/TCAP/TBX3/FLNC/NOTCH1/CCN3/TNNT2/RGS2/WFIKKN1/CACNA2D2/AKAP6/RARB/DLL1/NPPA	64
	BP	GO:0043406	positive regulation of MAP kinase activity	47/1994	264/18866	0.000243634	0.00979295	0.00826029	AGT/IRAK2/FGF18/CSPG4/BMP2/PDGFD/PAK1/EDN1/MAPK11/CXCL17/THBS1/ADORA1/VEGFA/ADAM8/ADAM9/IGFBP6/CD74/ITGA1/WNT7B/MAP2K1/CD81/DKK1/TGFBR1/DAB2IP/SHC2/TLR9/TGFB3/TNFRSF11A/PDGFB/MAP3K9/ROBO1/TGFA/NOD1/BMP4/AJUBA/TP73/DUSP5/EPHA4/KSR1/GADD45A/PDE5A/MLKL/PLCE1/MAP3K8/MAP3K10/F2R/TLR4	47
	BP	GO:1901888	regulation of cell junction assembly	38/1994	200/18866	0.000245821	0.00983511	0.00829586	AGT/ACE2/AMIGO2/EFNA5/LRP1/WNT7A/SRPX2/BDNF/THBS1/OCLN/VEGFA/PTPRS/EPHB3/EPHA2/CLSTN3/VSTM5/SLITRK6/SIX4/DAPK3/AGRN/GPC4/NTRK2/NLGN3/DKK1/SEMA4A/MAP4K4/PHLDB2/DLG5/DLC1/WNT4/CLDN3/MACF1/PTPRJ/CAMSAP3/OXTR/ADGRB2/ACE/LRFN4	38
	BP	GO:0043542	endothelial cell migration	50/1994	286/18866	0.000247049	0.0098387	0.00829888	AGT/S100P/GATA3/DNAJA4/FGF18/PPARG/HMOX1/HDAC5/ATP2B4/HIF1A/EDN1/WNT7A/SRPX2/PTPRM/ANXA3/ADAMTS9/S100A2/EMP2/THBS1/KLF4/VEGFA/PLK2/NR2F2/PROX1/EPHA2/SP1/GLUL/EMC10/TGFBR1/DAB2IP/SEMA4A/STC1/PDGFB/AMOT/ROBO1/EFNA1/BMP4/RGCC/BCAR1/ITGB1/JCAD/GADD45A/NRP2/PRKCA/ETS1/SIRT1/FUT1/NOTCH1/CCN3/ITGB2	50
	BP	GO:0010832	negative regulation of myotube differentiation	8/1994	18/18866	0.000253354	0.00999765	0.00843296	CEACAM5/BHLHE41/HDAC5/BDNF/CFLAR/HDAC4/NOTCH1/CCN3	8
	BP	GO:0050961	detection of temperature stimulus involved in sensory perception	8/1994	18/18866	0.000253354	0.00999765	0.00843296	NTSR1/LXN/MMP24/ASIC3/ADORA1/WDR47/NR2F6/ARRB2	8
	BP	GO:0010935	regulation of macrophage cytokine production	7/1994	14/18866	0.000255402	0.0100327	0.00846249	TGFB2/CD74/TGFB3/GPRC5B/SEMA7A/HLA-G/TLR4	7
	BP	GO:0051898	negative regulation of protein kinase B signaling	17/1994	64/18866	0.000257545	0.0100711	0.00849488	TRIB3/DDIT3/PKHD1/KLF4/XDH/EPHA2/BTN2A2/BANK1/ARRB2/MTM1/PPP2R5B/HYAL2/MAGI2/PTPRJ/GPER1/SIRT1/HLA-G	17
	BP	GO:0060047	heart contraction	50/1994	287/18866	0.000269103	0.0104756	0.00883613	TMEM38A/AGT/CACNA1D/ACE2/GJC1/ATP2B4/EDN1/PDE4B/VEGFB/BIN1/CCN2/TGFB2/ADORA1/TNNI2/KCNJ2/SLC1A1/SEMA3A/ATP2A1/CACNG4/DMD/STC1/ITPR2/CYP2J2/SCN1B/GPD1L/SMAD7/ITPR1/S100A1/EHD3/PDE5A/KCND1/CACNB1/CACNA2D4/HDAC4/TCAP/SCN3B/PDE4D/CACNA2D1/FLNA/ACE/TRPC1/FGF12/ATP1B3/TNNT2/RGS2/SLC4A3/CACNA2D2/TNNC1/NPPA/CACNB4	50
	BP	GO:0043409	negative regulation of MAPK cascade	36/1994	187/18866	0.000271164	0.0104828	0.00884217	AGT/TIMP3/PSCA/MECOM/CYLD/NDRG2/PINK1/SMAD4/QARS1/SIRPA/DUSP1/KLF4/SMPD1/EZR/IGF1R/ATF3/NF2/RPS6KA6/BTN2A2/PAQR3/DAB2IP/EMILIN1/EFNA1/WNK2/BMP4/HYAL2/DUSP5/DUSP16/MAPK8IP1/PTPRJ/GPER1/FOXM1/DUSP10/RGS2/TLR4/NPPA	36
	BP	GO:0001763	morphogenesis of a branching structure	38/1994	201/18866	0.000272832	0.0104828	0.00884217	PGF/AGT/TGM2/CSF1/BMP2/PAX8/NKX3-1/SOCS3/PAK1/EDN1/RASIP1/SMAD4/VEGFA/GRHL2/FOXA1/NPNT/PROX1/PBX1/EPHA2/BTRC/SIX4/ESRP2/SEMA3A/ENG/NFATC4/RDH10/PRDM1/NTN4/DLG5/CTSH/WNT4/PKD2/BMP4/TNC/TBX3/NOTCH1/LAMA5/GLI2	38
[truncated: 497 more rows]

## Sheet: Table S6
Table S6. P68 specific signatures.
[truncated: 67 more rows]

## Sheet: Table S7
Table S7. The overlap non-synonymous variants in P68 organoids and the parental tumor.
[truncated: 54 more rows]

[truncated: 1 more sheets: Table S8]
